# Supplementary material for: Strategies to Deimplement Opioid Prescribing in Primary Care: A Cluster Randomized Clinical Trial
Source: PubMed Central journal article supplement (PMC11581553; doi:10.1001/jamanetworkopen.2024.38325), 2024-10-10
Supplement: jamanetwopen-e2438325-s001.pdf [file jamanetwopen-e2438325-s001.pdf]

**Promoting the implementation of clinical guidelines for opioid prescribing in primary care using systems consultation**

**Principal Investigator:**

**Andrew R. Quanbeck, PhD.**  
University of Wisconsin – Madison  
Department of Family Medicine and Community Health  
800 University Bay Drive  
Madison, WI 53705  
Phone: 608.262.7385  
Email: [arquambe@wisc.edu](mailto:arquambe@wisc.edu)

**Co-Investigators:**

**Randall Brown, M.D.**  
University of Wisconsin – Madison  
Department of Family Medicine and Community Health  
1100 Delaplaine Court  
Madison, WI 53715  
Phone: 608.263.6558  
Email: [randy.brown@fammed.wisc.edu](mailto:randy.brown@fammed.wisc.edu)

**Jillian Landeck, M.D.**  
University of Wisconsin – Madison  
Department of Family Medicine and Community Health  
1100 Delaplaine Court  
Madison, WI 53715  
Phone: 608.424.3384  
Email: [jillian.landeck@fammed.wisc.edu](mailto:jillian.landeck@fammed.wisc.edu)

**Nora Jacobson, PhD.**  
University of Wisconsin – Madison  
School of Nursing  
701 Highland Avenue  
Madison, WI 53705  
Phone: 608.262.8034  
Email: [najacobson@wisc.edu](mailto:najacobson@wisc.edu)

**Paul Hunter, M.D.**  
University of Wisconsin – Madison  
Department of Family Medicine and Community Health  
1100 Delaplaine Court  
Madison, WI 53715  
Phone: 608.265.0477  
Email: [phunter@wisc.edu](mailto:p hunter@wisc.edu)

**David H. Gustafson, PhD.**  
University of Wisconsin – Madison  
College of Engineering – Industrial & Systems Engineering  
1513 University Avenue  
Madison, WI 53706  
Phone: 608.263.4882

Email: [dhgustafson@wisc.edu](mailto:dhgustafson@wisc.edu)

**Daniel Almirall, PhD.**  
University of Michigan  
Institute for Social Research  
426 Thompson Street  
Ann Arbor, MI 48104  
Phone: 734.936.3077  
Email: [dalmiral@umich.edu](mailto:dalmiral@umich.edu)

**Consultants:**

**Lynn Madden, PhD.**  
University of Wisconsin – Madison  
College of Engineering – Industrial & Systems Engineering  
1513 University Avenue  
Madison, WI 53706  
Phone: NA  
Email: [lmadden3@wisc.edu](mailto:lmadden3@wisc.edu)

**Funder:**

**National Institute of Health: NIDA**

**Coordinating Center:**

**Implementation and Engineering Science Lab**  
University of Wisconsin – Madison

**IRB Serving of Record:**

**University of Wisconsin – Madison IRB**

**Participating Institutions:**

**Bellin Health**  
Andrew Cohen  
Site Principal Investigator  
744 South Webster Avenue  
Green Bay, WI 54305  
Phone: 920-433-3642  
Email: [andrew.cohen@bellin.org](mailto:andrew.cohen@bellin.org)

**University of Michigan**  
500 S State Street  
Ann Arbor, MI 48109

**UW Health**  
600 Highland Avenue  
Madison, WI 53792

**Table of Contents**

|     |                                      |
|-----|--------------------------------------|
| 90  |                                      |
| 91  |                                      |
| 92  | Abstract                             |
| 93  | 1. Introduction/Background           |
| 94  | 2. Objectives                        |
| 95  | 3. Selection of Clinics and Subjects |
| 96  | 4. Registration Procedures           |
| 97  | 5. Treatment Plan                    |
| 98  | 6. Measurement of Effect             |
| 99  | 7. Study Parameters                  |
| 100 | 8. Statistical Considerations        |
| 101 | 9. Records to be Kept                |
| 102 | 10. References                       |
| 103 |                                      |

**Abstract**

The proposed study uses a sequential, multiple assignment randomized trial (SMART)<sup>1,2</sup> to test an adaptive version of systems consultation<sup>3</sup> consisting of academic detailing, practice facilitation, and physician peer coaching to increase the uptake of safer opioid prescribing practices at three levels of primary care (health system, clinic, prescriber). Academic detailing will be provided to all clinics and prescribers to inform prescribers on the goals of the study, the importance of improving opioid prescribing in primary care, and a review of the latest standards of prescribing guidelines. After three months, clinics will be randomized to receive nothing or receive practice facilitation where clinics will get an in-person or online visit and proceed with monthly teleconferences to improve clinic workflow related to opioid prescribing. Six months later, clinics will receive physician peer coaching that will employ two experienced addiction specialists who will provide guidance to prescribers dealing with tough patient panels. Additionally, this study aims to capture and analyze contextual factors that influence implementation in order to create a simple tool that will guide quality improvement in opioid prescribing. This SMART will deliver these three strategies to 40 primary care clinics from three health systems to compare the effect on average morphine milligram dose of an adaptive systems consultation implementation strategy compared to academic detailing alone over a 21 month time period. To our knowledge, this study would be the first to randomize at two levels to test the efficacy of the implementation of system consultation to improve opioid prescribing in primary care.

## **1. Background & Significance**

### **Importance of improving prescribing practices in primary care**

Opioids are commonly prescribed in primary care to relieve chronic pain. Although potentially effective for this purpose, accompanying burdens have become clear and widespread. In 2017, drug overdose was the leading cause of accidental death in the United States. Although the volume of opioids prescribed in the US declined each year from 2010 to 2015, about 3 times more opioids were prescribed per person in 2015 as in 1999, and prescribing rates still vary greatly, with the highest-prescribing counties prescribing 6 times more opioids per person than the lowest-prescribing counties.<sup>4</sup> In 2015, 63.1% of drug-overdose deaths involved an opioid,<sup>5</sup> and approximately half of opioid-related deaths involved prescription opioids.<sup>6</sup> About half of opioid prescriptions are written in primary care.<sup>7,8</sup> Clinical guidelines for opioid prescribing in primary care have been advanced, most notably the guidelines issued by the Centers for Disease Control and Prevention in 2016.<sup>8</sup> Clinical guidelines have established consensus around a few basic ideas: (1) Physicians should discuss the risks and benefits of opioid therapy with patients by reviewing and signing formal treatment agreements before initiating the first opioid dose and throughout treatment.<sup>8</sup> (2) Clinicians should avoid prescribing opioids in doses higher than 90-100 morphine milligram equivalent (MME) daily; evidence shows that patients with a dose of 100 MME or greater are 11 times more likely to die from overdose than patients taking doses less than 20 MME.<sup>9-11</sup> (3) patients at increased risk for misuse (i.e., those with mental health or substance use disorders) are more likely to receive opioid prescriptions and higher doses; thus, screening for mental health and substance use disorders should be in place.<sup>9,12-14</sup> (4) Opioid-benzodiazepine co-prescribing in any combination of doses should be avoided to reduce the risk of overdose.<sup>15</sup> (5) Monitoring via urine drug testing should be instituted to ensure appropriate use of opioid medications.<sup>16</sup>

### **Strategies for implementing evidence-based practices**

Despite the promotion of evidence-based practices (EBPs) related to opioid prescribing (and many other conditions), the healthcare system is notoriously slow in adopting EBPs.<sup>17</sup> Lau et al. conducted a 2015 review<sup>18</sup> of 91 studies aimed at determining the effectiveness of strategies for implementation of complex interventions in primary care settings. The most commonly used strategies were targeted at individual providers, generally demonstrating small to modest effects, with considerable variability between studies. The authors found little use of implementation strategies targeted at organizations or a wider context (e.g., health systems). Finally, the review found very limited data on the costs and cost-effectiveness of different implementation strategies should be used under what conditions, and that future research should study implementation strategies targeted at levels more broadly defined than individual providers. According to a systematic review focused specifically on the role of external change agents (e.g., coaches, facilitators, academic detailers, etc.) in primary care settings, the more successful implementation strategies tended to be those that offered regular, context-specific follow-up.<sup>19</sup>

### **Systems consultation**

Systems consultation is a theoretically and empirically grounded,<sup>3</sup> blended implementation strategy<sup>20,21</sup> consisting of a bundle of 3 discrete strategies: (1) Academic detailing, in which an experienced physician provides recommendations and advice on how to improve clinical practice; (2) Practice facilitation, a team-based advising approach designed to tailor implementation to specific

178 clinical contexts; and (3) Physician peer coaching, in which an experienced physician provides one-  
179 on-one clinical advice on managing patient panels to other physicians (who may be less experienced  
180 with the selected clinical issue). Several other discrete strategies are also integrated into the systems  
181 consultation model, as categorized by Powell et al.'s (2015)<sup>20</sup> taxonomy of implementation strategies,  
182 including: use of community-academic partnership, where leaders from an academic medical center  
183 work with community- based care clinics to improve the health of their communities; audit and  
184 feedback , which consists of providing performance feedback to clinics; conducting local assessments  
185 to determine the need for implementation; and tailoring implementation strategies to address potential  
186 barriers and facilitators.

### 187 **Adapting implementation strategies to specific contexts**

188 Primary care clinics vary in their opioid prescribing practices and in their capacity to carry out  
189 implementation efforts. Clinics and prescribers are influenced by factors such as funding, regulations,  
190 geography, and policies. These considerations suggest that strategies for implementing EBPs will  
191 work differently in different clinics; moreover, different strategies might work best for different  
192 prescribers, depending on the prescriber's patient panel, experience in prescribing opioids, and other  
193 influences. Previous implementation research<sup>22</sup> suggests that implementation strategies tailored to  
194 specific clinics are the most effective, although evidence also suggests that the effect of tailoring  
195 varies, and tends to be small to moderate.<sup>23</sup> The literature does not specify the most effective  
196 approaches to adaptation or the cost-effectiveness of tailored strategies (compared with non-tailored  
197 strategies).<sup>18,23</sup>

## 198 **2. Study Objectives**

199 This study aims to understand the optimal sequencing and combination of implementation strategies  
200 that specific types of clinics and prescribers need to adopt clinical guidelines for opioid prescribing.  
201 The pragmatic goal is to give health systems a tool they can use to predict which clinics and  
202 prescribers will benefit most from which sequence and combination of implementation strategies. The  
203 bundle of strategies systems consultation consists of include academic detailing, practice facilitation,  
204 and physician peer coaching. We propose to recruit 40 clinics and 152 prescribers from 2 health  
205 systems for a sequential, multiple assignment randomized trial to receive academic detailing only,  
206 academic detailing + practice facilitation, academic detailing + practice facilitation + physician peer  
207 coaching, or academic detailing + physician peer coaching. We will use quantitative and qualitative  
208 analyses to compare outcomes of sequences and combinations with data collected every 3 months  
209 over the 21-month intervention period.

### 210 **Primary Aim:**

211 Compare the effect of an adaptive systems consultation implementation strategy vs. academic  
212 detailing alone on average morphine milligram equivalent dose over 21 months.

### 213 **Secondary Aims:**

- 214 • Develop an assessment of contextual factors that influence the effectiveness of different  
215 implementation strategies.

- Test 4 moderators and assess other factors that affect implementation to use to predict which implementation strategies will be most effective in different settings.
- Estimate the costs of delivering 4 different sequences and combinations of strategies, including the incremental cost effectiveness of adding facilitation and physician peer coaching.

## Study Coordination

The UW-Madison Implementation Science and Engineering Lab is the coordinating site for this study. The UW study coordinator will oversee all activities at the 40 clinics which include:

- developing site specific recruitment and data collection processes that meet study objectives;
- training site staff prior to the study on protocol procedures to maintain compliance with the protocol and human subjects regulation;
- communicating with site staff via monthly correspondence to monitor progress, inform of protocol changes/distribute new version of protocol, and address unanticipated issues or challenges;
- and manage all study data.

## 3. Selection of Subjects

Patients are not the subject of the study. The subjects of study will be the clinic prescribers.

Prescriber panel data will be aggregated to the clinic and prescriber levels. To be included in the aggregated, de-identified prescriber panel data, patients must:

1. have a primary care provider at the clinic;
2. prescriptions for opioid therapy for at least 3 consecutive months;
3. and no cancer diagnosis or reception of hospice care.

**Clinics:** A total of 40 clinics will be recruited from primary care clinics of the two health systems: UW Health and Bellin Health. This protocol will detail the process at UW Health primary care clinics for which the HS IRB is the IRB of record. Bellin Health will follow similar procedures with oversight from the UW study coordinator.

Clinics will be eligible for the study if they:

1. are a primary care clinic (non-pediatric primary care, internal medicine, or family medicine);
2. have not received the systems consultation intervention; and
3. do not explicitly prohibit initiating opioid therapy.

**Change team:** Up to 7 team members will be recruited and consented to participate in practice facilitation. Change teams include a change team leader (likely a clinic medical director or other clinician) and supporting clinic staff such as nurse practitioners, physician assistants, registered nurses, lab technicians, and medical assistants.

**Prescribers:** de-identified patient data will be aggregated at the level of the prescriber and clinic. In this context, prescribers will be known to the study team only by the code number assigned to them by HIP. Data will be obtained only from those clinicians who:

1. are primary care physicians or other providers with prescribing privileges;
2. are not temporary providers who do not manage stable panels or patients;

## **4. Registration Procedures**

### **Clinic Recruitment**

The study team will discuss the study with health system leaders who gave letters of support and identify clinics that may be interested in participating. The study team will present the study to clinicians at an all-provider meeting to build awareness and inform clinics that this study is available to join. Health care leaders will send an email on behalf of the study team to clinic medical directors of the health system. The email will notify medical directors that research is being done at clinics of their health system and instruct them how to opt-out if they wish to decline participation in the study and future contact from the study team. The email will instruct medical directors to direct any questions they have to the study team.

Medical directors who choose not to opt-out of the study will be invited via email to attend the regional academic detailing meetings. Medical directors will be asked to forward the email to any clinic staff who may be interested in participating in the academic detailing meeting. The email will instruct interested medical directors and clinic staff to call the study team if they are interested in attending or have any questions. Clinics will be asked to allow medical directors and interested clinic staff to attend regional academic detailing meetings on clinic time where the study team will explain the study objectives and participation expectations. Medical directors and clinicians will sign consent forms and will be handed information sheets after the study is explained, but before further information about opioid prescribing is presented. Those attending the academic detailing meeting via webinar will be sent the consent form electronically and sign and return the consent form before the meeting. All signed consent forms will be sent via email, fax, or postal service to the study team. Medical directors will be assured that there is no obligation to participate in the study and that their decision is voluntary. The study team will explain to medical directors that the clinic and clinicians can drop out from study participation at any time and that their clinical practice will in no way be affected by their choice to participate or not.

### **Staff Recruitment**

Following the academic detailing meeting an email will be sent out to all clinic staff by the medical director of behalf of the study team. The email will inform clinic staff that research may be conducted at their clinic, what the research activities they may be asked to participate in include, and that they should contact the study team if they have any questions. While clinicians have the opportunity to opt-out of individual-level activities, they still may be involved in the research by virtue of doing their jobs in a clinic where the study is occurring. In a separate email the study team will provide the clinicians who could not make the academic detailing meeting with a link to a webinar. The study team will ask prescribers and clinicians who may participate on the change team who are interested in participating in the study to watch the webinar and sign the consent form. All signed consent forms will be sent via email, fax, or postal service to the study team.

The study team will call medical directors of clinics that have been randomized to receive practice facilitation to schedule the online or in-person clinic visit and ask the medical director to identify individuals who might be interested in participating on a change team. The medical director will



298 identify an appropriate individual who might be interested in being a change team leader, and up to 5  
299 additional clinicians to serve as change team members. At the online or in-person clinic visit the study  
300 team will provide change team members with a virtual or hard copy information sheet about practice  
301 facilitation. The information sheet will inform change team members what is required of them and that  
302 their participation is voluntary. The change team will be told that there is no obligation to participate  
303 and that their clinical practice will in no way be affected by their choice to participate or not. The study  
304 team will assure clinicians that they can take their time to think about their participation and may  
305 leave the practice facilitation at any time. While most future meetings are anticipated to be virtual, any  
306 face-to-face contacts with clinician subjects will take place at the regional meeting, in the clinician  
307 subject's office or in a private room in the clinic at a convenient time for the clinician subject. Virtual  
308 meetings will be held securely over WebEx. Online practice facilitation sessions will be recorded to  
309 review for notes and accuracy. Notes will be kept securely on Box and recorded sessions will be  
310 destroyed.

### 311 **Consent**

312 A request for a waiver of informed consent will be made for health system leaders and for clinic staff  
313 in clinic-level interventions. The study team will ask health system leaders to send out an email on  
314 behalf of the study team, informing medical directors about the research and the ability to opt-out of  
315 future communication with the study team. Medical directors who do not opt-out by a specified date  
316 on the email will be invited to the academic detailing meetings and have the ability to forward the  
317 email to other interested clinicians. These subjects will sign consent forms and receive a study  
318 information sheet at the academic detailing meeting. Those attending the meeting via webinar will be  
319 asked to read, sign, and return consent forms prior to the meeting. Webinar attendees will send the  
320 signed consent form to the study team via email, fax, or mail.

321 After the academic detailing meetings, the medical director will send out an email on behalf of the  
322 study team to notify clinic employees that research may be done at their clinic and that they have the  
323 option to opt-out of the study activities. The study team will consent any prescriber and clinic staff  
324 who did not attend the academic detailing meeting, but wish to participate in the study via email.  
325 Prescribers will be sent an email with a link to the webinar of the academic detailing meeting and a  
326 consent form to read and sign. Prescribers will send the signed consent form to the study team via  
327 email, fax, or mail.

328 If participants decide to no longer participate in the study they will contact the PI, Andrew Quanbeck,  
329 to rescind their consent. Data that is already collected will be retained for analyses, but no further  
330 data of that participant will be provided to the study team.

331 A waiver of signed consent will be requested for qualitative interviews. Participants will be invited over  
332 email to participate in interviews. After a week, if the participant does not respond to the email the  
333 study team will call the participant to invite them to the study. The study team will call once. If there is  
334 no answer a new invite will be sent to a different participant. Participants who agree to be interviewed  
335 will be sent information sheets to read. This consent process is supplemental from the consent  
336 process participants went through at or before the educational meeting.

### 337 **Randomization**

338 Randomization will take place at the clinic level at month 3 (practice facilitation) and month 9  
339 (physician peer coaching). A research team member will conduct the randomization using the urn  
340 randomization program.

341 Randomization of clinics will take place at intervention month 3 on a 1:1 ratio to assign clinics that will  
342 receive practice facilitation plus academic detailing or academic detailing only. At intervention month  
343 9 all clinics will be randomized on a 1:1 ratio to assign clinics who will receive the current intervention  
344 strategy plus physician peer coaching or continue the current intervention strategy for 12 months.  
345 Randomizations will be stratified on clinic's 1) health system, 2) number of patients, and 3) average  
346 MME being greater or equal to the health system's clinic average.

## 347 **5. Intervention Plan**

348 While the intervention plan is continuing as intended, due to the COVID-19 pandemic, study  
349 intervention activities were put on hold between March 25<sup>th</sup> and July 15<sup>th</sup>. Study activities have since  
350 resumed as intended.

351 Subjects will receive a combination of the following strategies:

352 **Academic detailing.** Clinicians from participating clinics will be invited to a regionally hosted, in-  
353 person training session where they will be provided lunch. The study team will also have a webinar  
354 option (such as WebEx) for clinicians who cannot travel to the regional in-person meeting. The  
355 session will be designed to both inform and engage clinic staff in the study. The session will be led by  
356 Dr. Randall Brown and Jillian Landeck, who are experts in addiction medicine with extensive  
357 experience managing the care of long-term opioid patients. Invitees will be medical directors and  
358 prescribers (physicians, nurse practitioners, physician assistants), nurses, and staff directly involved  
359 in clinic workflows related to opioid prescribing (e.g., medical assistants, lab techs, etc.). We will ask  
360 each clinic to designate the clinic medical director to serve as contacts for the research team. The  
361 training will cover the goals of the study, the importance of improving opioid prescribing in primary  
362 care, a review of the latest standards of guidelines concordant care, how improvements in clinic  
363 workflows can affect patient outcomes, clinical topics such as how to address opioid-induced  
364 hyperalgesia and balancing patient-reported pain and function during dose reduction, and trainings on  
365 how to use electronic medical records to monitor key opioid prescribing outcomes. An assessment  
366 will be conducted during the session to elicit contextual characteristic that use the electronic health  
367 record to monitor key opioid prescribing outcomes. The assessment will be a survey given at  
368 meetings or online (for those joining via webinar)s. If clinicians are watching the academic detailing  
369 meeting on their own or via webinar, they can take the survey on REDCap. At the conclusion of the  
370 initial meeting, clinicians who attended the meeting will be asked to form change teams at their  
371 clinics.

372 A quarterly hour-long academic detailing meeting will be hosted via webinar (such as WebEx) to  
373 provide clinics and clinicians further information about the CDC opioid prescribing guidelines.  
374 Quarterly webinar meetings will be separate for each study arm.

376 Following the academic detailing meeting, the health systems will create and deliver audit & feedback reports  
377 to clinicians. Health systems are already doing this and will customize the reports to fit the study. These reports  
378 will let clinicians know about their clinic's opioid prescribing metrics such as average MME, % of patients with  
379 urine drug testing, treatment agreements, and mental health screens, and % of patients co-prescribed  
380 benzodiazepines. Reports will only be at the clinic level.

381 **Practice facilitation.** Research staff trained in practice facilitation and/or study team members will  
382 meet virtually with clinics using WebEx (or visit clinics in-person) and follow up over the course of up  
383 to 5 monthly then 4 quarterly videoconferences or teleconferences to help clinics improve processes  
384 related to opioid prescribing, such as ensuring that treatment agreements are signed by prescribers  
385 and patients at least once a year, and integrating urine drug testing into clinic workflows. Clinic  
386 medical directors will create change teams consisting of the clinic medical director and a physician  
387 change leader and up to 5 clinic staff. The online or in-person visit will begin with a meeting with the  
388 clinic medical director and the change team leader. At the meeting the facilitator will set a plan for the  
389 day and answer any questions about the meeting. The facilitator will tour the clinic in-person or  
390 virtually over WebEx.<sup>24</sup> The facilitator will then meet (in-person or virtually) with the change team for  
391 an hour to cover how to make workflow changes such as integrating treatment agreements and urine  
392 drug tests into clinic processes. The change team will be educated about the nominal group  
393 technique<sup>25</sup> and Plan-Do-Study-Act cycles<sup>26</sup> (PDSA cycles) to select the area of improvement for the  
394 first PDSA cycle. The practice facilitator will assist the change team in filling out the PDSA cycle and  
395 the practice facilitator will enter the info into the Change cycle data table for reference for the follow-  
396 up conference call. Then the facilitator will debrief with the medical director and change team leader  
397 to discuss the next steps for follow-up discussions. Over the next 18 months clinics will be able to call  
398 in or meet over WebEx for up to 5 monthly, 60 minute-long meetings, followed by 4 quarterly hour-  
399 long follow-up discussions about the workflow changes. Sessions will be recorded using encrypted  
400 audio recorders or WebEx's recording feature. Recordings will be used to ensure accurate note  
401 taking. Recordings from audio recorders will be stored on the facilitator's password-protected  
402 computer or laptop. Once note taking is completed the recordings will be destroyed.

403 **Physician peer coaching.** At UW Health, physician peer coaches will be Drs. Brown and Landeck.  
404 At Bellin Health, physicians with relevant experience in opioid prescribing will be nominated by health  
405 system leaders to become each systems' physician peer coaches. These coaches will become  
406 members of the research team. Drs. Brown and Landeck help their peers manage their patients on  
407 opioid therapy. Participating clinics randomized to physician peer coaching will receive up to 4  
408 quarterly coaching sessions over 12 months. Physician peer coaches will provide help to prescribers  
409 to assist with tough panels through up to four quarterly coaching sessions over 12 months. Coaching  
410 consultations will occur in sessions via videoconference (WebEx) or teleconference. Participants  
411 attending the physician peer coaching sessions will be asked to take a survey before each session to  
412 let the coach know what topics the group needs help with. After each physician peer consulting  
413 session, participants will be asked to complete a post-session survey to assess how the session was  
414 received and how confident the participant feels about addressing the session topic with patients.  
415 After the fourth and last session, participants in the physician peer consultation interventions will be  
416 asked to take a final survey to evaluate how the intervention impacted their confidence and  
417 experiences treating patients prescribed opioids for chronic pain, and feedback on the intervention  
418 itself.

419 **Data collection**

420 *Quantitative data.* Evaluation data extracted from the electronic health records of patients on  
421 prescriber panels will be constructed and delivered by the Health Innovation Program (HIP) on behalf  
422 of the Wisconsin Collaborative for Healthcare Quality (WCHQ). All members of the collaborative  
423 (including UW Health) and other specially invited members (Bellin) submit patient level data extracted  
424 from health records to a central data repository (called RBS, or “Repository Based Data  
425 Submission”), which HIP is able to access through their Business Associate agreement with WCHQ.  
426 The electronic data from the WCHQ is accessed by HIP through a secure File Transfer Protocol  
427 (FTP) site that is set up by WCHQ. An FTP is a secure way of moving data from WCHQ to an outside  
428 organization such as HIP. Datasets for researchers are constructed from these identifiable datasets  
429 that have been transformed into de-identified datasets by HIP Programmers, who are not part of the  
430 study team. Patient-level data will be grouped by prescriber and clinic for this project, and prescribers  
431 and clinics will be coded so that the Programmers are able to deliver longitudinal data at the  
432 prescriber and clinic levels. The study team will not have access to a crosswalk or any other code that  
433 would allow re-identification of the de-identified dataset delivered by HIP to the research team.  
434 Datasets will be extracted and delivered from the start of the intervention to the end of the 6-month  
435 follow-up at intervention month 27. No sensitive information will be included in the analysis dataset.  
436 No individual PHI will be collected in the course of this study. Only aggregate statistical output  
437 representing groups of subjects will be released.

438  
439 *Qualitative data.* The study team will conduct two sets of semi-structured interviews (exact questions  
440 will vary based on answers to other questions) using the UW sponsored HIPPA compliant WebEx.  
441 Semi-structured interviews will be conducted with two change team leaders or their designees (a total  
442 of 8 participants) selected randomly from each intervention group at each participating health system.  
443 The interviews will take place at intervention month 18 to better understand what practice facilitation  
444 activities were done at clinics, what worked and did not work, and feedback on the intervention. A  
445 second set of semi-structured interviews will be conducted with one prescriber (a total of 8  
446 participants) selected randomly from each intervention group at each participating health system.  
447 These interviews will take place between intervention months 18-21 to better understand what peer  
448 support activities were done at clinics, what worked and did not work, what prescribers find  
449 problematic, how peer support groups helped prescribers address these issues, and feedback on the  
450 intervention. Qualitative interviews will be recorded and transcribed for analysis using WebEx’s  
451 recording and transcription feature. All identifying information will be coded and transcripts will be  
452 stored securely on a Box folder (no PHI will be uploaded to the Box folder). The recording will be  
453 destroyed after it is transcribed.

454 *Assessments.* This study has developed a tailoring assessment based on pilot data to test 4  
455 moderators (existence of an opioid prescribing policy at the system level, experience of quality  
456 improvement at the clinic level, size of the clinic, and number of high dose patients) and assess other  
457 factors that affect implementation through open and closed-ended questions. At 0, 5, 9, and 21  
458 months assessments will be administered online (via REDCap) and online or in-person surveys. If in-

459 person visits occur, participants will be asked to complete a hardcopy assessment. In-person  
460 assessment data will be entered into ICTR's REDCap.

461 *Detailed contact logs.* Research team members responsible for delivering the implementation  
462 strategies will keep detailed logs of contact with clinics and prescribers to estimate measures of  
463 adoption and implementation. All identifiable information will be de-identified by a research team  
464 member.

465 In the event that subjects (clinic or prescriber) choose to withdraw from the study, data that is already  
466 collected will be kept for analyses. No further data will be collected from that subject. If the clinic  
467 withdraws, all prescribers at that clinic will not have further data collected.

#### 468 Physician peer consulting surveys

469 The study team will ask participants in the physician peer consulting intervention to take a pre- and  
470 post-session survey for each session and a final, post-session survey using UW Madison's version of  
471 Qualtrics. Surveys will ask questions about the topics prescribers want to discuss at the upcoming  
472 consultation session, how confident they are in addressing the issues discussed at the past session,  
473 and their experience with their consultant and the intervention. The surveys will only ask the  
474 participant to provide their health system and clinic they practice at so the study team will know which  
475 topics to discuss at each clinic's consulting session, understand how the consulting session was  
476 receive, and make any adaptations to future consulting sessions. For this reason, health system and  
477 clinic information will not be coded or de-identified. However, the research coordinator will code  
478 health system and clinic for the analysis.

#### 479 **Privacy and Confidentiality**

480 To mitigate the risk of breaches of confidentiality, all subjects and clinics will be assigned a code  
481 number. A list of subject and clinic code numbers will be maintained by a research team member and  
482 stored in a password-protected spreadsheet. This data will be kept on a secure, limited access,  
483 password-protected file service on ICTR's REDCap and UW's Qualtrics.

484 **Potential Risks:** This research is aimed at improving clinical practice related to opioid prescribing,  
485 and falls ultimately under the context of increasing patient safety. As such, the study team believes  
486 the risks to clinician subjects and individual patients are minimal, and the intervention will improve  
487 patient safety. The potential risks of participation are:

- 488 1. Staff members could feel pressured to participate in the study. Opioid prescribing is a  
489 potentially controversial topic.
- 490 2. Prescribers may be uncomfortable discussing their prescribing practices and may resist  
491 attempts to change clinical practice. To mitigate any perceived pressure to participate in the  
492 study, the research team will make it clear, through written materials and oral instructions, that  
493 staff participation in the research is completely voluntary.
- 494 3. There could be a breach of confidentiality that could result in disclosure of research data  
495 outside the study team. To prevent this, all subjects will be assigned a code number. The lists  
496 will be kept in a locked file at HIP, and will not be shown to staff. Data collected will have the

names removed and the code attached by a research team member. Project staff who have access to data will not have access to subject names.

We have taken the following measures to reduce potential risk to subjects:

1. The primary units of analysis will be the clinic and prescribers; no staff members will ever be identified in presentations or publications.
2. The research team will emphasize the idea that the current implementation study is intended to improve opioid prescribing practices.
3. To address the risk of breach of confidentiality the research team will be provided only de-identified datasets and no individual provider will be able to be ascertained from these datasets nor will any member of the study team attempt to identify providers. Any qualitative data collected will be protected as well. Hard copy data will be kept in a locked cabinet and digital data will be stored on ICTR's REDCap.

#### *UW-ICTR's Data Monitoring Committee.*

This study will use UW-ICTR's Data Monitoring Committee. UW-ICTR has established a Data Monitoring Committee (DMC) to provide a key resource for UW-Madison investigators conducting clinical research. This DMC will provide investigators services to ensure appropriate measures are in place to promote subject safety, research integrity and compliance with federal regulations and local policies for individual clinical research protocols in need of DMC review (as determined by the Principal Investigator (PI), the funding agency, the local Scientific Review Committee, or the local IRB, and for which no DMC exists). For these studies, the UW ICTR DMC will be the primary data and safety advisory group for the Principal Investigator.

The DMC is supported in its mission of safety and compliance by experienced ICTR staff to provide administrative assistance, experienced members representing a diversity of backgrounds, skills and knowledge, and the use of the Research Electronic Data Capture (REDCap) tool which provides data management functionality by allowing the development of eCRFs and surveys to support data capture. In providing oversight for the conduct of this study, the ICTR DMC will meet every 12 months during the 5-year study. Additional meetings may be scheduled as determined by the DMC or as requested by the PI. The DMC members will review protocol-specific reports created by statisticians that serve a non-voting member role on the DMC using data pulled from REDCap. These standard reports will include an overview of study objectives, a review of actual and projected accrual rates, an evaluation of patient demographics for balance of randomization, and a summary of the number and seriousness of adverse events. An interim analysis of study results may be performed and source documents may be reviewed to allow the DMC to independently judge whether the overall integrity and conduct of the protocol remain acceptable based on data provided and reported by the Principal Investigator. The DMC will make recommendations to the Principal Investigator that could include actions of continuation, modification, suspension, or termination.

This study may be temporarily suspended or prematurely terminated if there is sufficient reasonable cause. Written notification, documenting the reason for study suspension or termination, will be provided by the suspending or terminating party to The National Institute on Drug Abuse. If the study

is prematurely terminated or suspended, the PI will promptly inform the IRB and will provide the reason(s) for the termination or suspension.

Circumstances that may warrant termination or suspension include, but are not limited to:

- Determination of unexpected, significant, or unacceptable risk to subjects
- Demonstration of efficacy that would warrant stopping
- Insufficient compliance to protocol requirements
- Data that are not sufficiently complete and/or evaluable
- Determination of futility

Study may resume once concerns about safety, protocol compliance, or data quality are addressed and satisfy the applicable federal and institutional regulatory authorities.

**6. Measurement of Effect**

This proposal uses the Reach, Effectiveness, Adoption, Implementation, and Maintenance (RE-AIM) model as an organizing evaluation framework<sup>27</sup> to examine the quality, speed, and impact of implementing the adaptive system consultation strategies. RE-AIM is a comprehensive evaluation framework that assesses implementation in five dimensions. While RE-AIM has been used to evaluate many diseases of fidelity.<sup>28</sup> Specific measures for each RE-AIM dimension are presented in Table 1.

**7. Study Parameters**

| <b>Domain</b>                                                                                                                                                                | <b>Source</b> | <b>Pertains to aim:</b> | <b>Months* collected</b> |
|------------------------------------------------------------------------------------------------------------------------------------------------------------------------------|---------------|-------------------------|--------------------------|
| <b>Reach:</b> # and % of patients excluded vs. participating (incl. characteristics)                                                                                         | EHR           | PA, SA1                 | 1-21                     |
| <b>Effectiveness:</b> Overall rate of opioid prescribing and average MME per clinic and provider                                                                             | EHR           | PA                      | 1-21                     |
| # and % of patients completing urine drug testing (past 12 mo.)                                                                                                              | EHR           | PA                      | 1-21                     |
| # and % of patients screened for mental health using PHQ-2 (past 12 mo.)                                                                                                     | EHR           | PA                      | 1-21                     |
| Mental health (PHQ-9) scores for patients screening positive on PHQ-2 (past 12 mo.)                                                                                          | EHR           | PA                      | 1-21                     |
| Overall rate and dose of opioid-benzodiazepine co-prescribing                                                                                                                | EHR           | PA                      | 1-21                     |
| # and % of patients with treatment agreements (past 12 mo.)                                                                                                                  | EHR           | PA                      | 1-21                     |
| # and % of opioid prescriptions above 90 MME                                                                                                                                 | EHR           | PA, SA1                 | 1-21                     |
| Patient attendance at scheduled clinic visits                                                                                                                                | EHR           | PA, SA2                 | 1-21                     |
| # and % of patients prescribed buprenorphine                                                                                                                                 | EHR           | PA                      | 1-21                     |
| # and % of patients with PEG-3 score (past 12 mo.)                                                                                                                           | EHR           | PA                      | 1-21                     |
| PEG-3 scores (past 12 mo.)                                                                                                                                                   | EHR           | PA                      | 1-21                     |
| <b>Adoption (setting):</b> # and % of participating clinics vs. all clinics (incl. characteristics)                                                                          | HS            | SA1                     | 1-21                     |
| <b>Adoption (staff):</b> # and % of participating staff vs. all eligible clinic staff (incl. characteristics)                                                                | Clinic        | SA1                     | 1-21                     |
| Clinician attendance at intervention meetings                                                                                                                                | RT            | SA1                     | 1-21                     |
| <b>Implementation:</b> Hours of intervention received per clinic & prescriber                                                                                                | RT            | SA1                     | 1-21                     |
| Adaptations made to protocols during intervention period                                                                                                                     | RT            | SA1                     | 1-21                     |
| Assessment of 4 moderators: system-level opioid prescribing policy, clinic-level experience in QI, size of clinic (# patients), # and % of patients on opioid doses > 90 MME | RT; EHR       | SA1                     | 0, 5, 9, 21              |
| Qualitative assessment of mechanisms of action & factors influencing implementation                                                                                          | RT            | SA1                     | 1-21                     |
| Cost of each different implementation sequence & combination                                                                                                                 | RT            | SA2                     | 1-21                     |

|                                                                                                                                                                               |     |          |       |
|-------------------------------------------------------------------------------------------------------------------------------------------------------------------------------|-----|----------|-------|
| <b>Maintenance:</b> 6-mo. Follow-up on all effectiveness outcomes                                                                                                             | EHR | All aims | 22-27 |
| *Months correspond to intervention months<br>PA: Primary aim; SA1, Secondary aim 1; SA2, Secondary aim 2; RT: Research team; HS: Health system; EHR: Electronic health record |     |          |       |

Clinics will be randomized on a 1:1 ratio to either receive practice facilitation plus academic detailing or academic detailing alone at month 3. At month 9, all clinics will be randomized on a 1:1 ratio to either continue the current intervention or add physician peer coaching to the bundle of strategies. It is anticipated that up to 152 prescribers will be recruited from 40 primary care clinics among 2 healthcare systems. The intervention will last for 21 months followed by a 6 month follow-up period.

**8. Statistical Considerations**

**Research Design**

Analyses will be conducted at two levels, (1) at the clinic level and (2) at the prescriber level. UW Health and Bellin Health primary care clinics will be recruited for participation in the intervention and data collection activities. All clinics and all prescribers within clinics, once randomized, will be included in the intent-to-treat sample. The primary research outcome is morphine milligram equivalent (MME) and will be available for all prescribers within all clinics that consent, regardless of intervention engagement or drop-out.

This study will use a sequential, multiple assignment randomized trial (SMART), which is a factorial design (see Figure 1).<sup>1,2</sup> This SMART has 4 implementation strategies embedded within it.

Figure 2. Study design

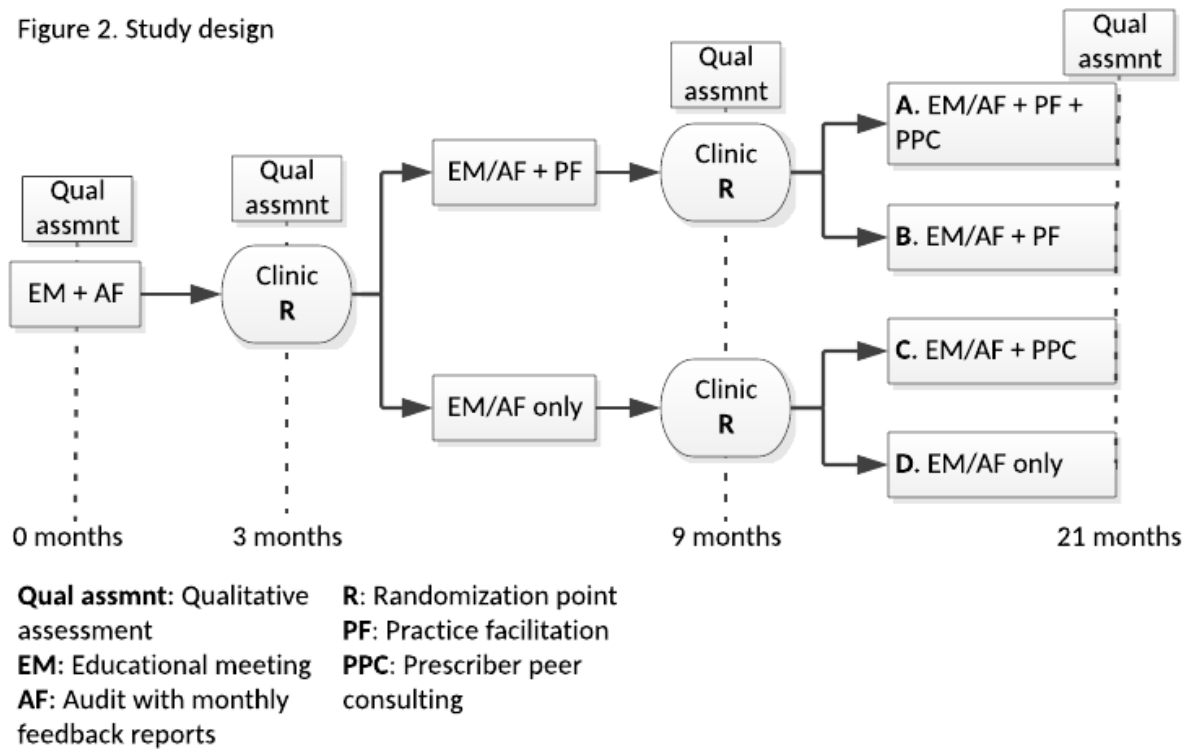



571 **Quantitative data collection and analysis**

572 Data are available for many study measures, allowing for time-series analysis of repeated measures  
573 to detect changes in a clinic over time (pre-intervention vs. post-intervention). Clinics and prescribers  
574 will be compared to clinics and prescribers receiving only academic detailing by accessing measures  
575 through the Wisconsin Collaborative Healthcare Quality system-wide data warehouse at Health  
576 Innovation Program (HIP). Programmers and compliance officers at HIP will prepare a de-identified  
577 dataset analysis purposes by the study statistician. The dataset will remain on HIP's secure data  
578 servers at all times.

579 The quantitative analysis of data from the electronic health record (EHR) will focus primarily on  
580 average daily morphine milligram equivalent for chronic pain patients at the clinic and prescriber  
581 levels. Changes in outcomes will be assessed through repeated monthly observations assessed  
582 retrospectively post-intervention. Data will be collected every three months throughout the 21 month  
583 intervention and 6 month follow-up period.

584 The study team will analyze the de-identified dataset delivered by HIP for evaluation purposes. The  
585 research team will not have access to any individual patient data or PHI. Prescriber identities will be  
586 protected; identifying information (such as staff names) will be replaced with code numbers by the  
587 HIP Programmers. The de-identified dataset will be coded by prescriber and clinic and the code key  
588 will be kept by HIP Programmers and not provided to the study team.

589 Due to delays in the data delivery from the Wisconsin Collaborative Healthcare Quality the research  
590 team will also receive and analyze data that the UW Clinical Research Data Services (CRDS)  
591 provides for the clinic feedback reports. The purpose for this is to speed up data analysis. CRDS will  
592 act as an honest broker and will not provide the research team with patient-level identifiable data.  
593 CRDS will provide data to the research team through ICTR REDCap's file repository feature.

594 **Qualitative data collection and analysis**

595 Interviews over WebEx for practice facilitation and physician peer coaching will be recorded and  
596 transcribed. Subjects will be reminded that calls are recorded. The recordings will be transcribed and  
597 coded by the study team. Qualitative analyses will be done using Nvivo.

598 Qualitative assessments will be conducted to assess contextual factors of systems consultation.  
599 These assessments will be coded to group data at the clinic level for analysis and take place at  
600 months 0, 5, 9, and 21 of the intervention.

601 Qualitative data will be collected via REDCap at the prescriber levels will be stored REDCap for  
602 analysis purposes. Any publication that results from the study data will not include the names of  
603 clinics or staff members where data were collected. All other results will be presented in anonymous  
604 aggregated form.

605 **Statistical analysis**

606 Statistical analysis will be conducted by Daniel Almirall at the University of Michigan. Dr. Almirall will  
607 be provided a secure, remote login to the password-protected servers at the Health Innovation  
608 Program to access the de-identified datasets.

609 The analysis will use a longitudinal (repeated-measures) analysis. Time will be coded such that  $t=0$   
610 denotes month 3 of the intervention period (the initial randomization); in the following text, data  
611 collected prior to  $t=0$  is considered baseline data (including the MME prior to month 3). The primary  
612 outcome (MME) is a continuous measure and is collected at  $t=0$  (at month 3, prior to randomization)  
613 and every 3 months up to  $t=18$  (intervention month 21) for a total of 7 measurement occasions. (Note  
614 that the primary outcome is clustered: repeated measures, within prescribers, within clinics.)  
615 Longitudinal regression models, adapted for the analysis of a longitudinal SMART<sup>29,30</sup> and further  
616 extended for use with data arising from a cluster-randomized SMART,<sup>31</sup> will be used to contrast the 4  
617 sequences and combinations of implementation strategies in terms of the average change in MME.

618 A piecewise-linear model with a knot at  $t=6$  (MME collected immediately before the second  
619 randomization at intervention month 9) will be used to model the temporal trajectories over the course  
620 of months 10-21. The model the study plans to use has a linear trend from  $t=0$  to  $t=3$  for prescribers  
621 in academic detailing plus practice facilitation and academic detailing only clinics, and a linear trend  
622 from  $t=3$  to month  $t=18$  for each of the 4 sequences and combinations of implementation strategies.  
623 We allow for changes in the mean trajectory (i.e., deflections) at intervention month 9 ( $t=6$ ) since this  
624 is the point at which prescribers may begin receiving physician peer coaching.

## 625 **Cost analysis**

626 This study will estimate the cost of delivering the four different sequences and combinations of  
627 strategies, including incremental cost effectiveness of adding practice facilitation and physician peer  
628 coaching. Methods and instruments used for cost data collection in the Systems Consultation R34<sup>3</sup>  
629 will be used. Detailed logs of call contacts between members of the research team and the clinic  
630 change teams will be kept to estimate the number of hours spent delivering the implementation  
631 strategy. The consultants will document the date and duration of each contact they have with clinic  
632 staff members, role of the staff member, and a summary of topics discussed. Cost estimates of the  
633 intervention will be calculated by multiplying hourly wage rates for physician peer coaches and  
634 practice facilitators. Costs for non-personnel may include travel to site visits, the cost of  
635 teleconferencing services for follow-up calls, etc.

## 636 **Power**

637 The estimated sample size for this study is based on the primary aim: a comparison on change in  
638 morphine milligram equivalent (MME) between implementation sequences of all three strategies vs.  
639 academic detailing only. Based on the pilot data, the inter-clinic correlation coefficient was 0.14.  
640 Assuming the average prescribers per clinic is 4, a type-1 error rate of 5%, and an early adoption rate  
641 of 50% gives a total of 40 primary care clinics at 80% power to detect an effect size of  $d=0.66$   
642 between the two implementation sequences on change in MME. In the pilot data we found a standard  
643 deviation of 35 MME, which is estimated to detect differences on MME as small as 18 MME.  
644

**9. Records to be Kept**

| Data to be collected                                | Storage                                                            | Type of Data  |
|-----------------------------------------------------|--------------------------------------------------------------------|---------------|
| Clinician subject intake                            | REDCap/ Locked cabinet                                             | Coded         |
| Clinician subject demographics                      | REDCap/ Locked cabinet                                             | Coded         |
| Qualitative assessment data                         | REDCap/ Locked cabinet                                             | Coded         |
| Prescriber consent form                             | REDCap/ Locked cabinet                                             | Coded         |
| Systems consultation coaching log                   | Box folder/ Locked cabinet                                         | Coded         |
| De-identified patient electronic health record data | HIP                                                                | De-identified |
| Practice facilitation notes                         | Box folder                                                         | Coded         |
| Audio recordings from PF/PPC sessions               | Facilitator computer/laptop (audio) or WebEx cloud storage (video) | Recording     |
| Audio recordings from interviews                    | WebEx secure cloud storage                                         | Recording     |
| Transcriptions of interviews                        | Box folder                                                         | De-identified |
| Physician peer consulting survey                    | UW Qualtrics                                                       | Coded         |

**10. References**

1. Murphy SA, Bingham D. Screening experiments for developing dynamic treatment regimes. *J Am Stat Assoc.* 2009;104(458):391-408. PMID: PMC2892819.
2. Lei H, Nahum-Shani I, Lynch K, Oslin D, Murphy SA. A "SMART" design for building individualized treatment sequences. *Annu Rev Clin Psychol.* 2012;8:21-48. PMID: PMC3887122.
3. Quanbeck AB, Brown RT, Zgierska AE, Jacobson N, Robinson JM, Johnson RA, et al. A randomized matched-pairs study of feasibility, acceptability, and effectiveness of systems consultation: a novel implementation strategy for adopting clinical guidelines for opioid prescribing in primary care. *Implement Sci.* 2018;13:21.
4. Centers for Disease Control and Prevention (CDC). Vital Signs: Opioid Prescribing. Atlanta, GA: U.S. Department of Health & Health Services. Sept 26, 2017. Accessed on: Jan 25, 2018. Available at: <https://www.cdc.gov/vitalsigns/opioids/index.html>.
5. Rudd RA, Seth P, David F, Scholl L. Increases in drug and opioid-involved overdose deaths - United States, 2010-2015. *MMWR Morb Mortal Wkly Rep.* 2016;65(5051):1445-52.
6. Centers for Disease Control and Prevention (CDC). CDC WONDER. Atlanta, GA: U.S. Department of Health & Human Services. Jan 10, 2018. Accessed on: Jan 25, 2018. Available at: <https://wonder.cdc.gov/>.

- 665 7. Daubresse M, Chang HY, Yu Y, Viswanathan S, Shah ND, Stafford RS, et al. Ambulatory  
666 diagnosis and treatment of nonmalignant pain in the United States, 2000-2010. *Med Care*.  
667 2013;51(10):870-8. PMID:PMC3845222.
- 668 8. Dowell D HT, Chou R. CDC guideline for prescribing opioids for chronic pain — United States,  
669 2016. *MMWR Recomm Rep*. 2016;65(RR-1):1-49.
- 670 9. Edlund MJ, Martin BC, Fan MY, Devries A, Braden JB, Sullivan MD. Risks for opioid abuse and  
671 dependence among recipients of chronic opioid therapy: Results from the TROUP Study. *Drug*  
672 *Alcohol Depen*. 2010;112(1-2):90-8. PMID: PMC2967631.
- 673 10. Bohnert ASB, Valenstein M, Bair MJ, Ganoczy D, McCarthy JF, Ilgen MA, et al. Association  
674 between opioid prescribing patterns and opioid overdose-related deaths. *JAMA*. 2011;305(13):1315-  
675 21.
- 676 11. Dunn KM, Saunders KW, Rutter CM, Banta-Green CJ, Merrill JO, Sullivan MD, et al. Opioid  
677 prescriptions for chronic pain and overdose: a cohort study. *Ann Intern Med*. 2010;152(2):85-92.  
678 PMID: PMC3000551.
- 679 12. Edlund MJ, Martin BC, Devries A, Fan MY, Braden JB, Sullivan MD. Trends in use of opioids for  
680 chronic noncancer pain among individuals with mental health and substance use disorders: the  
681 TROUP study. *Clin J Pain*. 2010;26(1):1-8. PMID: PMC2917238.
- 682 13. Weisner CM, Campbell CI, Ray GT, Saunders K, Merrill JO, Banta-Green C, et al. Trends in  
683 prescribed opioid therapy for non-cancer pain for individuals with prior substance use disorders. *Pain*.  
684 2009;145(3):287-93. PMID: PMC2929845.
- 685 14. Banta-Green CJ, Merrill JO, Doyle SR, Boudreau DM, Calsyn DA. Opioid use behaviors, mental  
686 health and pain--development of a typology of chronic pain patients. *Drug Alcohol Depend*.  
687 2009;104(1-2):34-42. PMID: PMC2716214.
- 688 15. Gandam Venkata H, Gaurav C, Ram S, Talari G. Co-prescription of opioids and benzodiazepines.  
689 *BMJ*. 2017;356(j760).
- 690 16. Chou R, Fanciullo GJ, Fine PG, Adler JA, Ballantyne JC, Davies P, et al. Clinical guidelines for  
691 the use of chronic opioid therapy in chronic noncancer pain. *J Pain*. 2009;10(2):113-30. PMID:  
692 PMC4043401.
- 693 17. Levine DM, Linder JA, Landon BE. The quality of outpatient care delivered to adults in the United  
694 States, 2002 to 2013. *JAMA Intern Med*. 2016;176(12):1778-90. .
- 695 18. Lau R, Stevenson F, Ong BN, Dziedzic K, Treweek S, Eldridge S, et al. Achieving change in  
696 primary care—effectiveness of strategies for improving implementation of complex interventions:  
697 systematic review of reviews. *BMJ Open*. 2015;5(12):e009993. PMID: PMC4802575.

- 698 19. Alagoz E, Chih MY, Hitchcock M, Brown RT, Quanbeck A. The use of external change agents to  
699 promote quality improvement and organizational change in healthcare organizations: A systematic  
700 review. *BMC Health Serv Res.* 2018;18:42. PMC Journal- In Process.
- 701 20. Powell BJ, Waltz TJ, Chinman MJ, Damschroder LJ, Smith JL, Matthieu MM, et al. A refined  
702 compilation of implementation strategies: results from the Expert Recommendations for Implementing  
703 Change (ERIC) project. *Implement Sci.* 2015;10:21. PMID: PMC4328074.
- 704 21. Proctor EK, Powell BJ, McMillen JC. Implementation strategies: recommendations for specifying  
705 and reporting. *Implement Sci.* 2013;8:139. PMID: PMC3882890.
- 706 22. Wensing M, Bosch M, Grol R. Developing and selecting interventions for translating knowledge to  
707 action. *CMAJ.* 2010;182(2):E85-8. PMID: PMC2817342.
- 708 23. Baker R, Camosso-Stefinovic J, Gillies C, Shaw EJ, Cheater F, Flottorp S, et al. Tailored  
709 interventions to address determinants of practice. *Cochrane Database Syst Rev.* 2015(4):CD005470.  
710 PMID: PMC4164371.
- 711 24. Gustafson DH, Johnson KA, Capoccia V, Cotter F, Ford II JH, et al. The NIATx model: process  
712 improvement in behavioral health. Madison, WI: University of Wisconsin-Madison; 2011.
- 713 25. Delbecq AL, Van de Ven AH, Gustafson DH. Group techniques for program planning: a guide to  
714 nominal group and Delphi processes. Glenview, Ill: Scott Foresman Company; 1975.
- 715 26. Deming WE. *Out of the crisis.* Cambridge, Mass.: Massachusetts Institute of Technology, Center  
716 for Advanced Engineering Study; 1986.
- 717 27. Glasgow RE, Vogt TM, Boles SM. Evaluating the public health impact of health promotion  
718 interventions: the RE-AIM framework. *Am J Public Health.* 1999;89(9):1322-7. PMID: PMC1508772.
- 719 28. Gaglio B, Shoup JA, Glasgow RE. The RE-AIM Framework: A systematic review of use over time.  
720 *Am J Public Health.* 2013; 103:e38-e46.
- 721 29. Lu X, Nahum-Shani I, Kasari C, Lynch KG, Oslin DW, Pelham WE, et al. Comparing dynamic  
722 treatment regimes using repeated-measures outcomes: modeling considerations in SMART studies.  
723 *Stat Med.* 2016;35(10):1595-615. PMID: PMC4876020.
- 724 30. Almirall D, DiStefano C, Chang YC, Shire S, Kaiser A, Lu X, et al. Longitudinal effects of adaptive  
725 interventions with a speech-generating device in minimally verbal children with ASD. *J Clin Child  
726 Adolesc Psychol.* 2016;45(4):442-56. PMID: PMC4930379.
- 727 31. NeCamp T, Kilbourne A, Almirall D. Comparing cluster-level dynamic treatment regimens using  
728 sequential, multiple assignment, randomized trials: Regression estimation and sample size  
729 considerations. *Stat Methods Med Res.* 2017;26(4):1572-89.
