# Supplementary material for: Strategies to Deimplement Opioid Prescribing in Primary Care: A Cluster Randomized Clinical Trial
Source: PubMed Central journal article supplement (PMC11581553; doi:10.1001/jamanetworkopen.2024.38325), 2024-10-10
Supplement: jamanetwopen-e2438325-s002.pdf [file jamanetwopen-e2438325-s002.pdf]

## Supplementary Online Content

Quanbeck A, Robinson J, Jacobson N, et al. Strategies to deimplement opioid prescribing in primary care: a cluster randomized clinical trial. *JAMA Netw Open*. 2024;7(10):e2438325.  
doi:10.1001/jamanetworkopen.2024.38325

**eMethods.** Opioid Study Primary Analysis—Statistical Modeling  
**eReferences.**

This supplementary material has been provided by the authors to give readers additional information about their work.

# eMethods. Opioid Study Primary Analysis—Statistical Modeling

- Overview

This outline provides statistical modeling results for the opioid study primary analysis. These building blocks can be filtered, rearranged and modified as necessary for creation of a journal submission. Some aspects may be held in reserve to address questions from reviewers or to flesh out conference presentations. The tables and graphs below were copied from an Excel spreadsheet that may be easily modified to adjust fonts, colors, headings, etc.

- Sample Outcomes by PCP and Study Month for a Randomly Selected Clinic

The first three graphs below provide examples of the progression of observed quarterly outcomes for a typical study clinic over the 18-month study intervention period. The sample clinic has seven primary care physicians (PCPs, labeled A through F) responsible for opioid prescriptions to clinic patients. The graphs display three of the seven primary analysis outcomes, i.e., average opioid patient morphine milligram equivalent (MME) daily doses for the quarter, the percent of opioid patients with average MME values at or above 90 mg per day, and the percent of opioid patients with a urine drug screen in the last 12 months. The fourth graph displays the number of opioid patients associated with each PCP over the 18-month period.

These graphs are intended to give the audience a sense of the data layout and the level of outcome variation between PCPs and quarter to quarter for each PCP. Similar graphs at the study arm level contain too many PCP lines to track the progression of values for individual PCPs.

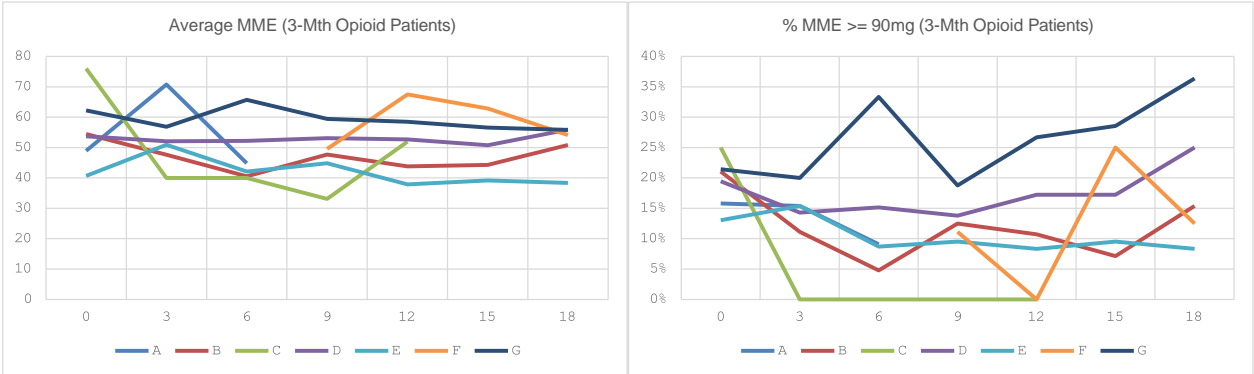

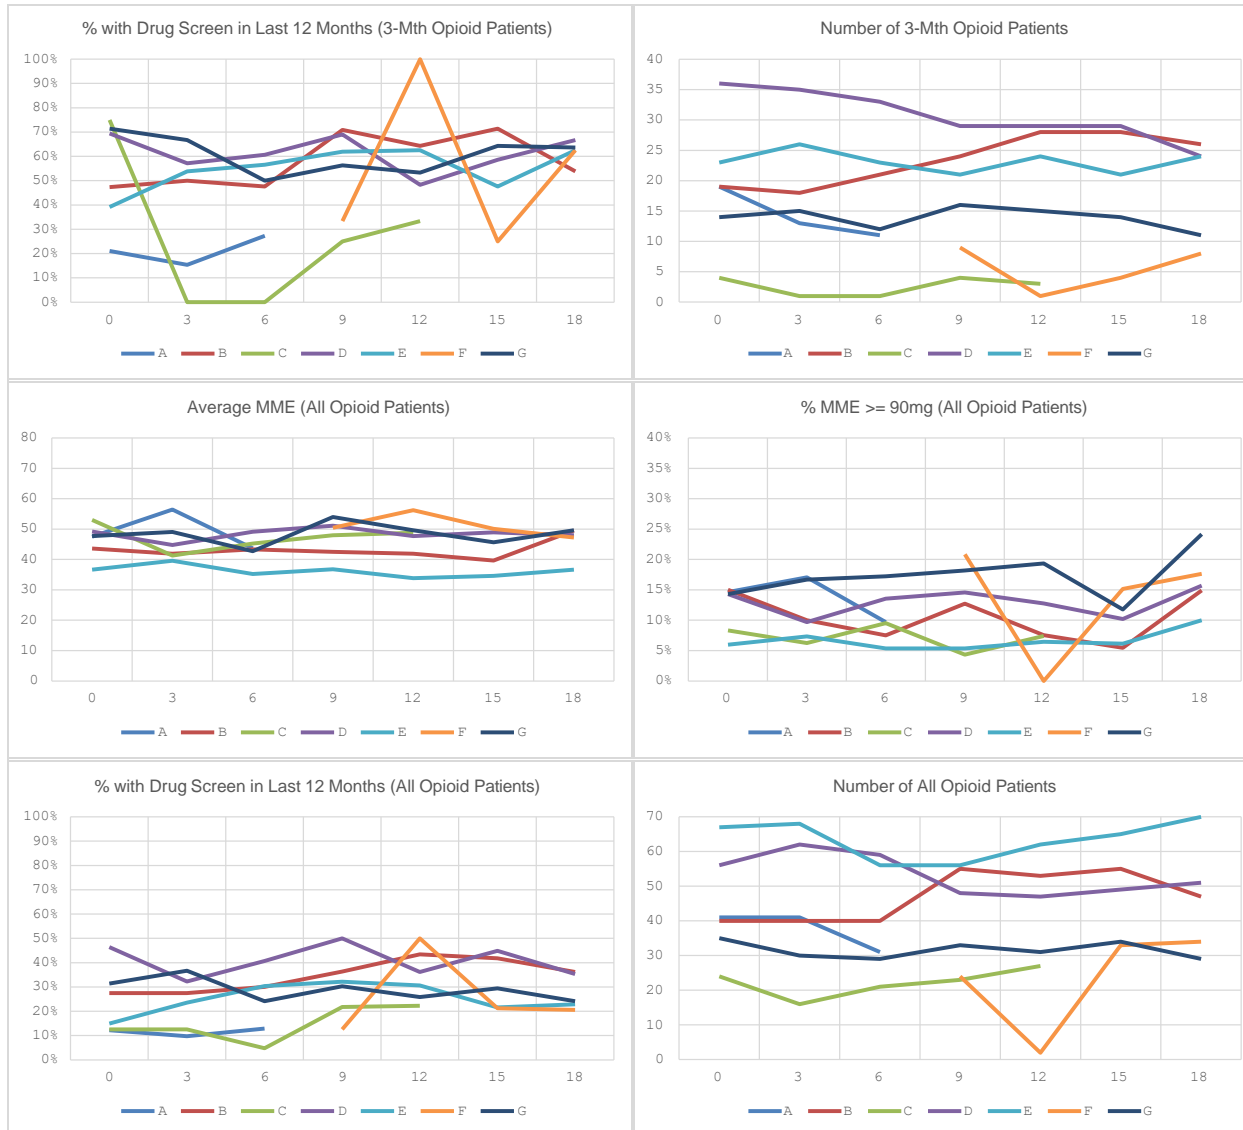

- The number of qualifying opioid patients varies significantly from PCP to PCP. The number of patients over time for a PCP varies to a lesser degree.
- Variance in outcomes over time is greater for PCPs with fewer patients.
- Variance in outcomes is greater for 3-Mth Opioid Patients than for All Opioid Patients – again due to smaller patient counts.
- Such large variations in outcomes over time may make it difficult to monitor/manage outcomes for PCPs with few opioid patients.

- Note that some PCPs have missing observations at the end of the study (i.e., they have no qualifying opioid patients after a certain point) – see PCP C above.
- Note that some PCPs have missing observations at the start of the study (i.e., they have no qualifying opioid patients before a certain point, but are engaged with the clinic) – see PCP F above.

- Baseline Descriptive Profile by Health System and Study Arm

This table provides basic descriptive information at baseline, without delving into initial outcome levels. The columns highlighted in light green show “All Opioid Patient” counts, i.e., in-scope opioid patients satisfying all of the study criteria (e.g., non-cancer, adult, etc.) except for the requirement of opioid use in each of the most recent three calendar months. In-scope patients meeting the 3-month use requirement are referred to as “3-Mth Opioid Patients” and are displayed in the last four light blue columns. The intent is to indicate the impact of applying the 3-month recent use criteria on the number of patients used in the primary analysis. The light green columns can be easily hidden if not needed for the initial paper submission.

### Baseline Profile by Study Arm

| System                 | PF | PPC | Clinics   | PCPs       | PCPs w/ Opioid Patients | All Opioid Patients | All Opioid Patients w/MME | All Opioid Patients w/o MME | %           | 3-Mth Opioid Patients | 3-Mth Opioid Patients w/MME | 3-Mth Opioid Patients w/o MME | %           | <3-Mth Opioid Patients | <3-Mth Opioid Patients w/MME | <3-Mth Opioid Patients w/o MME | %           |
|------------------------|----|-----|-----------|------------|-------------------------|---------------------|---------------------------|-----------------------------|-------------|-----------------------|-----------------------------|-------------------------------|-------------|------------------------|------------------------------|--------------------------------|-------------|
| Bellin                 | 0  | 0   | 5         | 20         | 19                      | 951                 | 893                       | 58                          | 6.1%        | 478                   | 457                         | 21                            | 4.4%        | 473                    | 436                          | 37                             | 7.8%        |
| Bellin                 | 0  | 1   | 4         | 11         | 11                      | 384                 | 357                       | 27                          | 7.0%        | 112                   | 101                         | 11                            | 9.8%        | 272                    | 256                          | 16                             | 5.9%        |
| Bellin                 | 1  | 0   | 4         | 16         | 15                      | 613                 | 581                       | 32                          | 5.2%        | 188                   | 178                         | 10                            | 5.3%        | 425                    | 403                          | 22                             | 5.2%        |
| Bellin                 | 1  | 1   | 5         | 37         | 34                      | 1,367               | 1,287                     | 80                          | 5.9%        | 370                   | 358                         | 12                            | 3.2%        | 997                    | 929                          | 68                             | 6.8%        |
| <b>Bellin Total</b>    |    |     | <b>18</b> | <b>84</b>  | <b>79</b>               | <b>3,315</b>        | <b>3,118</b>              | <b>197</b>                  | <b>5.9%</b> | <b>1,148</b>          | <b>1,094</b>                | <b>54</b>                     | <b>4.7%</b> | <b>2,167</b>           | <b>2,024</b>                 | <b>143</b>                     | <b>6.6%</b> |
| UW Health              | 0  | 0   | 3         | 40         | 39                      | 1,476               | 1,396                     | 80                          | 5.4%        | 697                   | 669                         | 28                            | 4.0%        | 779                    | 727                          | 52                             | 6.7%        |
| UW Health              | 0  | 1   | 4         | 66         | 64                      | 1,637               | 1,542                     | 95                          | 5.8%        | 813                   | 789                         | 24                            | 3.0%        | 824                    | 753                          | 71                             | 8.6%        |
| UW Health              | 1  | 0   | 4         | 49         | 46                      | 1,873               | 1,781                     | 92                          | 4.9%        | 797                   | 784                         | 13                            | 1.6%        | 1,076                  | 997                          | 79                             | 7.3%        |
| UW Health              | 1  | 1   | 3         | 29         | 28                      | 677                 | 636                       | 41                          | 6.1%        | 311                   | 300                         | 11                            | 3.5%        | 366                    | 336                          | 30                             | 8.2%        |
| <b>UW Health Total</b> |    |     | <b>14</b> | <b>184</b> | <b>177</b>              | <b>5,663</b>        | <b>5,355</b>              | <b>308</b>                  | <b>5.4%</b> | <b>2,618</b>          | <b>2,542</b>                | <b>76</b>                     | <b>2.9%</b> | <b>3,045</b>           | <b>2,813</b>                 | <b>232</b>                     | <b>7.6%</b> |
| <b>Grand Total</b>     |    |     | <b>32</b> | <b>268</b> | <b>256</b>              | <b>8,978</b>        | <b>8,473</b>              | <b>505</b>                  | <b>5.6%</b> | <b>3,766</b>          | <b>3,636</b>                | <b>130</b>                    | <b>3.5%</b> | <b>5,212</b>           | <b>4,837</b>                 | <b>375</b>                     | <b>7.2%</b> |

- While Bellin has more study clinics (18) than UW Health (14), the number of Bellin PCPs (84) is less than half of that for UW Health (184). Similarly, the number of Bellin opioid patients (1,148 with three consecutive months of opioid use) is less than half that for UW Health (2,618).

- Despite randomly assigning clinics within each health system to the study arms, the large variation in clinic size (even within size strata) resulted in significant variation in average clinic size by study arm. This is true whether size is measured in number of PCPs or number of opioid patients.
- This contributes to the uneven distribution by health system of study PCPs within each study arm. For example, the no-intervention arm has 33% of PCPs from Bellin, while the PF/PPC arm has 56% of PCPs from Bellin. To the extent that the two health systems might react to the study interventions differently, such uneven distributions within each arm will likely affect the relative observed changes in outcomes by study arm for the combined data. Note that the primary model includes a fixed effect term allowing the two health systems to have different outcome levels, but does not include any system-specific terms related to the change in outcomes over time associated with the study interventions.
- The requirement that study patients have used opioids for three consecutive months reduces the number of qualifying patients by 65% for Bellin and by 54% for UW Health.
- The percent of 3-month opioid patients with missing opioid MME values ranges from 1.6% to 9.8% by health system and study arm.
- Note that all of these variations by study arm resulted despite the random assignment of clinics to each arm. Other randomizations would likely have resulted in similar levels of variation by arm, but with different arms being “high” or “low” with respect to a given characteristic. The RCT

nature of the study obliges us to use the clinic data as assigned to each study arm in the primary model analysis. Secondary post-hoc analyses can be employed to explore the possible impacts of these uneven characteristics by study arm.

- Ending Descriptive Profile by Health System and Study Arm

This table provides the same information as the previous baseline table, but as of the final month of the 18-month study intervention period. The intent is to determine which baseline characteristics, if any, have changed significantly over the intervention period. Since the primary analysis uses a fixed PCP cohort, the total number of PCPs remains constant at 268, but the number of PCPs with opioid patients is expected to drop as some PCPs leave the clinic or health system.

### Ending Profile by Study Arm

| System                 | P<br>F | PP<br>C | Clini<br>cs | PCPs       | PCPs w/<br>Opioid<br>Patients | All<br>Opioid<br>Patients | All<br>Opioid<br>Patients<br>w/MME | All<br>Opioid<br>Patients<br>w/o<br>MME | %           | 3-Mth<br>Opioid<br>Patients | 3-Mth<br>Opioid<br>Patients<br>w/MME | 3-Mth<br>Opioid<br>Patients<br>w/o<br>MME | %           | <3-Mth<br>Opioid<br>Patients | <3-Mth<br>Opioid<br>Patients<br>w/MME | <3-Mth<br>Opioid<br>Patients<br>w/o<br>MME | %           |
|------------------------|--------|---------|-------------|------------|-------------------------------|---------------------------|------------------------------------|-----------------------------------------|-------------|-----------------------------|--------------------------------------|-------------------------------------------|-------------|------------------------------|---------------------------------------|--------------------------------------------|-------------|
| Bellin                 | 0      | 0       | 5           | 20         | 19                            | 832                       | 764                                | 68                                      | 8.2%        | 343                         | 333                                  | 10                                        | 2.9%        | 489                          | 431                                   | 58                                         | 11.9%       |
| Bellin                 | 0      | 1       | 4           | 11         | 10                            | 347                       | 332                                | 15                                      | 4.3%        | 81                          | 80                                   | 1                                         | 1.2%        | 266                          | 252                                   | 14                                         | 5.3%        |
| Bellin                 | 1      | 0       | 4           | 16         | 14                            | 526                       | 494                                | 32                                      | 6.1%        | 165                         | 160                                  | 5                                         | 3.0%        | 361                          | 334                                   | 27                                         | 7.5%        |
| Bellin                 | 1      | 1       | 5           | 37         | 33                            | 1,266                     | 1,190                              | 76                                      | 6.0%        | 359                         | 346                                  | 13                                        | 3.6%        | 907                          | 844                                   | 63                                         | 6.9%        |
| <b>Bellin Total</b>    |        |         | <b>18</b>   | <b>84</b>  | <b>76</b>                     | <b>2,971</b>              | <b>2,780</b>                       | <b>191</b>                              | <b>6.4%</b> | <b>948</b>                  | <b>919</b>                           | <b>29</b>                                 | <b>3.1%</b> | <b>2,023</b>                 | <b>1,861</b>                          | <b>162</b>                                 | <b>8.0%</b> |
| UW Health              | 0      | 0       | 3           | 40         | 32                            | 1,332                     | 1,273                              | 59                                      | 4.4%        | 625                         | 614                                  | 11                                        | 1.8%        | 707                          | 659                                   | 48                                         | 6.8%        |
| UW Health              | 0      | 1       | 4           | 66         | 45                            | 1,502                     | 1,440                              | 62                                      | 4.1%        | 728                         | 718                                  | 10                                        | 1.4%        | 774                          | 722                                   | 52                                         | 6.7%        |
| UW Health              | 1      | 0       | 4           | 49         | 35                            | 1,722                     | 1,646                              | 76                                      | 4.4%        | 681                         | 675                                  | 6                                         | 0.9%        | 1,041                        | 971                                   | 70                                         | 6.7%        |
| UW Health              | 1      | 1       | 3           | 29         | 23                            | 698                       | 670                                | 28                                      | 4.0%        | 313                         | 304                                  | 9                                         | 2.9%        | 385                          | 366                                   | 19                                         | 4.9%        |
| <b>UW Health Total</b> |        |         | <b>14</b>   | <b>184</b> | <b>135</b>                    | <b>5,254</b>              | <b>5,029</b>                       | <b>225</b>                              | <b>4.3%</b> | <b>2,347</b>                | <b>2,311</b>                         | <b>36</b>                                 | <b>1.5%</b> | <b>2,907</b>                 | <b>2,718</b>                          | <b>189</b>                                 | <b>6.5%</b> |
| <b>Grand Total</b>     |        |         | <b>32</b>   | <b>268</b> | <b>211</b>                    | <b>8,225</b>              | <b>7,809</b>                       | <b>416</b>                              | <b>5.1%</b> | <b>3,295</b>                | <b>3,230</b>                         | <b>65</b>                                 | <b>2.0%</b> | <b>4,930</b>                 | <b>4,579</b>                          | <b>351</b>                                 | <b>7.1%</b> |

- The ending profile is based on data at the end of the 18-month intervention period.
- The number of study PCPs with any opioid patients drops from 248 at baseline to 201 by the end of the intervention period.
- The percent of patients with missing opioid MME values drops from 3.5% at baseline to 2% at the end of the intervention period.
- Other characteristics by arm seem to remain reasonably constant (proportionally) over the study period.



- Baseline outcome measures

This table summarizes baseline outcome levels, i.e., those observed in study month t=0, the last calendar month prior to implementation of the Practice Facilitation (PF) intervention.

| Baseline Outcomes by Study Arm         |                        |         | Bellin     |          |         |          |       | UW Health  |          |         |          |       | Grand Total |
|----------------------------------------|------------------------|---------|------------|----------|---------|----------|-------|------------|----------|---------|----------|-------|-------------|
|                                        |                        |         | No Interv. | PPC Only | PF Only | PF & PPC | Total | No Interv. | PPC Only | PF Only | PF & PPC | Total |             |
| Average MME Prescribed in Last Quarter | All Opioid Patients    | Wgt Avg | 32.8       | 31.7     | 31.4    | 31.0     | 31.7  | 45.8       | 44.1     | 39.4    | 43.0     | 42.9  | 38.7        |
|                                        |                        | Wgt SD  | 8.5        | 4.2      | 4.4     | 7.7      | 7.2   | 15.3       | 13.5     | 10.3    | 9.8      | 12.9  | 12.4        |
|                                        | 3-Mth Opioid Patients  | Wgt Avg | 34.8       | 29.8     | 28.4    | 26.0     | 30.4  | 51.9       | 51.4     | 43.4    | 49.3     | 48.8  | 43.3        |
|                                        |                        | Wgt SD  | 12.0       | 11.9     | 8.0     | 6.2      | 10.6  | 25.1       | 19.7     | 16.5    | 14.3     | 20.2  | 19.7        |
|                                        | <3-Mth Opioid Patients | Wgt Avg | 30.6       | 32.4     | 32.8    | 33.0     | 32.4  | 40.2       | 36.5     | 38.1    | 37.4     | 38.1  | 35.7        |
|                                        |                        | Wgt SD  | 5.3        | 3.7      | 4.4     | 9.0      | 7.0   | 7.8        | 8.6      | 5.4     | 11.8     | 8.0   | 8.2         |
| Percent w/ MME ≥ 90 mg/day             | All Opioid Patients    | Wgt Avg | 5.3%       | 5.8%     | 5.5%    | 4.2%     | 4.9%  | 12.5%      | 11.4%    | 9.3%    | 10.6%    | 10.9% | 8.7%        |
|                                        |                        | Wgt SD  | 4.2%       | 3.5%     | 3.9%    | 3.5%     | 3.9%  | 8.2%       | 7.8%     | 5.2%    | 7.1%     | 7.2%  | 6.8%        |
|                                        | 3-Mth Opioid Patients  | Wgt Avg | 4.8%       | 3.8%     | 3.3%    | 2.7%     | 3.8%  | 15.9%      | 14.5%    | 12.0%   | 13.0%    | 13.9% | 10.9%       |
|                                        |                        | Wgt SD  | 4.8%       | 5.5%     | 4.2%    | 3.2%     | 4.4%  | 12.9%      | 10.7%    | 10.4%   | 11.3%    | 11.4% | 10.9%       |
|                                        | <3-Mth Opioid Patients | Wgt Avg | 5.8%       | 6.6%     | 6.5%    | 4.7%     | 5.6%  | 9.4%       | 8.1%     | 7.3%    | 8.4%     | 8.2%  | 7.1%        |
|                                        |                        | Wgt SD  | 4.8%       | 3.6%     | 4.7%    | 4.2%     | 4.5%  | 6.6%       | 8.9%     | 4.5%    | 10.6%    | 7.3%  | 6.4%        |
| Percent w/ Benzo in Last Quarter       | All Opioid Patients    | Wgt Avg | 12.1%      | 4.7%     | 5.2%    | 8.2%     | 8.4%  | 12.8%      | 11.0%    | 10.8%   | 11.2%    | 11.4% | 10.3%       |
|                                        |                        | Wgt SD  | 7.1%       | 2.7%     | 5.1%    | 6.9%     | 6.9%  | 5.6%       | 7.3%     | 4.5%    | 4.7%     | 5.8%  | 6.4%        |
|                                        | 3-Mth Opioid Patients  | Wgt Avg | 16.3%      | 4.5%     | 4.8%    | 13.5%    | 12.4% | 15.8%      | 12.8%    | 12.5%   | 13.5%    | 13.6% | 13.2%       |
|                                        |                        | Wgt SD  | 9.3%       | 5.0%     | 6.4%    | 12.6%    | 10.9% | 9.2%       | 11.2%    | 7.9%    | 8.7%     | 9.5%  | 10.0%       |
|                                        | <3-Mth Opioid Patients | Wgt Avg | 7.8%       | 4.8%     | 5.4%    | 6.2%     | 6.2%  | 10.1%      | 9.2%     | 9.1%    | 9.3%     | 9.4%  | 8.1%        |
|                                        |                        | Wgt SD  | 5.7%       | 3.6%     | 6.0%    | 5.6%     | 5.6%  | 4.8%       | 8.2%     | 5.8%    | 5.7%     | 6.3%  | 6.2%        |
| Percent w/ Urine Screen in Last Year   | All Opioid Patients    | Wgt Avg | 12.7%      | 15.6%    | 19.1%   | 7.8%     | 12.2% | 23.0%      | 18.5%    | 10.6%   | 20.5%    | 17.3% | 15.4%       |
|                                        |                        | Wgt SD  | 18.5%      | 14.2%    | 18.4%   | 5.0%     | 14.6% | 12.9%      | 14.7%    | 10.6%   | 12.2%    | 13.6% | 14.2%       |

|                                             |                        |         |       |       |       |       |       |       |       |       |       |       |       |
|---------------------------------------------|------------------------|---------|-------|-------|-------|-------|-------|-------|-------|-------|-------|-------|-------|
|                                             | 3-Mth Opioid Patients  | Wgt Avg | 21.8% | 33.9% | 42.0% | 16.8% | 24.7% | 40.7% | 32.6% | 21.8% | 37.6% | 32.1% | 29.8% |
|                                             |                        | Wgt SD  | 27.9% | 19.5% | 28.0% | 14.9% | 25.4% | 20.9% | 21.0% | 20.3% | 21.3% | 22.1% | 23.4% |
|                                             | <3-Mth Opioid Patients | Wgt Avg | 3.6%  | 8.1%  | 8.9%  | 4.5%  | 5.6%  | 7.1%  | 4.6%  | 2.1%  | 6.0%  | 4.5%  | 5.0%  |
|                                             |                        | Wgt SD  | 4.5%  | 9.8%  | 10.7% | 4.0%  | 7.1%  | 7.3%  | 7.7%  | 2.7%  | 8.4%  | 6.7%  | 6.9%  |
| Percent w/ Treatment Agreement in Last Year | All Opioid Patients    | Wgt Avg | 21.5% | 17.7% | 19.6% | 9.8%  | 15.9% | 6.0%  | 5.5%  | 3.7%  | 11.2% | 5.7%  | 9.5%  |
|                                             |                        | Wgt SD  | 14.2% | 10.6% | 19.9% | 8.6%  | 14.2% | 8.7%  | 8.2%  | 3.8%  | 9.0%  | 7.7%  | 11.6% |
|                                             | 3-Mth Opioid Patients  | Wgt Avg | 31.8% | 42.0% | 41.5% | 20.3% | 30.7% | 9.0%  | 9.5%  | 6.1%  | 19.3% | 9.5%  | 16.0% |
|                                             |                        | Wgt SD  | 17.4% | 14.3% | 30.7% | 16.7% | 21.4% | 14.8% | 13.3% | 7.9%  | 15.0% | 13.2% | 18.8% |
|                                             | <3-Mth Opioid Patients | Wgt Avg | 11.0% | 7.7%  | 9.9%  | 5.9%  | 8.0%  | 3.2%  | 1.6%  | 1.3%  | 4.4%  | 2.2%  | 4.6%  |
|                                             |                        | Wgt SD  | 11.3% | 6.0%  | 10.7% | 5.7%  | 8.6%  | 5.4%  | 3.1%  | 1.7%  | 7.0%  | 4.3%  | 7.1%  |
| Percent w/ PHQ-8/9 in Last Year             | All Opioid Patients    | Wgt Avg | 19.0% | 24.2% | 24.3% | 31.8% | 25.9% | 28.9% | 22.2% | 23.2% | 19.5% | 23.9% | 24.7% |
|                                             |                        | Wgt SD  | 12.8% | 12.1% | 19.6% | 18.9% | 17.6% | 14.5% | 11.7% | 10.3% | 9.3%  | 12.2% | 14.5% |
|                                             | 3-Mth Opioid Patients  | Wgt Avg | 17.8% | 23.2% | 21.8% | 31.4% | 23.3% | 34.9% | 23.5% | 25.6% | 21.2% | 26.9% | 25.8% |
|                                             |                        | Wgt SD  | 13.2% | 18.5% | 22.6% | 24.2% | 20.3% | 19.8% | 15.2% | 13.6% | 14.5% | 16.8% | 18.0% |
|                                             | <3-Mth Opioid Patients | Wgt Avg | 20.3% | 24.6% | 25.4% | 32.0% | 27.2% | 23.5% | 20.9% | 22.1% | 18.0% | 21.6% | 24.0% |
|                                             |                        | Wgt SD  | 13.5% | 10.3% | 20.6% | 18.5% | 17.8% | 13.1% | 13.5% | 12.0% | 12.1% | 12.8% | 15.3% |
| Percent w/ PEG3 in Last Year                | All Opioid Patients    | Wgt Avg | 0.0%  | 0.0%  | 0.0%  | 0.1%  | 0.1%  | 12.1% | 6.4%  | 2.1%  | 0.9%  | 5.8%  | 3.7%  |
|                                             |                        | Wgt SD  | 0.0%  | 0.0%  | 0.0%  | 0.6%  | 0.4%  | 13.7% | 11.3% | 4.0%  | 1.7%  | 10.5% | 8.8%  |
|                                             | 3-Mth Opioid Patients  | Wgt Avg | 0.0%  | 0.0%  | 0.0%  | 0.3%  | 0.1%  | 20.8% | 10.5% | 3.3%  | 1.3%  | 9.9%  | 6.9%  |
|                                             |                        | Wgt SD  | 0.0%  | 0.0%  | 0.0%  | 0.8%  | 0.5%  | 23.4% | 16.7% | 6.2%  | 2.0%  | 17.3% | 15.1% |
|                                             | <3-Mth Opioid Patients | Wgt Avg | 0.0%  | 0.0%  | 0.0%  | 0.1%  | 0.0%  | 4.2%  | 2.3%  | 0.7%  | 0.5%  | 2.0%  | 1.2%  |
|                                             |                        | Wgt SD  | 0.0%  | 0.0%  | 0.0%  | 0.5%  | 0.4%  | 7.3%  | 4.6%  | 1.7%  | 1.7%  | 4.8%  | 3.8%  |

- The “Wgt Avg” rows display average PCP baseline outcomes, weighted by the number of opioid patients associated with each PCP. The “Wgt SD” rows display the weighted PCP-to-PCP standard deviation of outcomes. These standard deviations indicate wide variation in outcomes from PCP to PCP.

- Bellin has consistently lower prescribed levels of opioids than UW Health, both in terms of average MME and the percent of patients with MME greater than or equal to 90 mg per day.
- For UW Health, average MME and percent of patients with MME  $\geq$  90 mg/day are somewhat greater for 3-month opioid patients than for all in-scope opioid patients. The reverse is the case for Bellin. Note that some in-scope opioid patients that do not satisfy the 3-month opioid use criteria may not have any opioid prescriptions in the 3-month period used to compute the MME values for these two outcomes. For these patients, the measures are treated as missing (i.e., the values are not set to zero) and the patients are excluded from the outcome calculations. So, the MME-based “All Opioid Patient” outcomes might better be described as “All Opioid Patients w/ At Least 1 Opioid Order in the Last 3 Months”. Ditto for the Benzo co-prescribing outcome.
- As expected, urine drug screening, PEG-3 pain screening, and treatment agreements rates are greater for 3-month opioid patients than for all in-scope opioid patients. PHQ-8/9 depression screening rates are about the same for 3-month and all opioid patients.
- Treatment agreement rates are higher for Bellin than for UW Health opioid patients.
- PEG-3 pain screening rates for Bellin are nearly zero at baseline, while UW Health rates vary significantly from arm to arm.
- Other baseline outcomes are similar for Bellin and UW Health.
- The variation in baseline outcomes by health system is accommodated in the primary model by a fixed effect intercept adjustment.
- There is also variation in baseline outcomes within each health system by study arm. As with other baseline characteristics, this variation occurs, despite the random assignment of clinics to study arms, due to the high levels or variation in baseline outcome levels from clinic to clinic and, within clinic, from PCP to PCP. The primary model includes clinic-level and PCP-level random intercept effects to accommodate these baseline differences.

## Primary Data Model

$$Y(ijkt) = \text{outcome value for study month } t, \text{ health system } i, \text{ clinic } j, \text{ PCP } k$$
$$= \eta(i) + \alpha x(ij) + \beta_1 t_7 + \beta_2 \text{PF}(ij) t_7 + \beta_3 t_{13} + \beta_4 \text{PF}(ij) t_{13} + \beta_5 \text{PPC}(ij) t_{13} + \beta_6 \text{PF}(ij) \text{PPC}(ij) t_{13}$$
$$+ u(ij) + v_0(ijk) + v_1(ijk) t_7 + v_2(ijk) t_{13} + \varepsilon(ijkt),$$

where,

$\eta(i)$  = baseline fixed effect intercept for health system  $i$ , where  $i = 1$  (UW Health) or  $2$  (Bellin)

$\alpha$  = fixed effect coefficient for impact of baseline clinic size

$x(ij)$  = baseline clinic size, i.e., opioid patient count for clinic  $ij$  minus statewide average opioid patient count

$t_7 = \max(0, t-7)$ , i.e., months from study month 7 (month of clinic PF randomization)

$t_{13} = \max(0, t-13)$ , i.e., months from study month 13 (month of clinic PPC randomization)

$\text{PF}(ij) = 1$ , if clinic  $ij$  is randomized to receive PF

$\text{PPC}(ij) = 1$ , if clinic  $ij$  is randomized to receive PPC

$\beta_1, \dots, \beta_6$  = fixed effect monthly slopes

$u(ij)$  = random effect intercept for clinic  $ij$  and  $u(ij) \sim \text{iid } N(0, \sigma_u^2)$

$v_0(ijk), v_1(ijk)$  and  $v_2(ijk)$  = random effect intercept and slopes for PCP  $ijk$ , and,

$\underline{v}(ijk) \sim \text{iid } N(0, \Sigma_v)$ , where vector  $\underline{v}(ijk) = [v_0(ijk), v_1(ijk), v_2(ijk)]'$

$\varepsilon(ijkt)$  = random error for PCP  $ijk$  at time  $t$ , where  $\varepsilon(ijkt) \sim \text{iid } N(0, \sigma_\varepsilon^2/n(ijkt))$  and

$n(ijkt)$  = opioid patient count associated with  $Y(ijkt)$

- Comments on model structure
  - Assumes a fixed effect piecewise linear spline with knots at  $t=7$  and  $t=13$ , where the slopes depend on the interventions (PF and/or PPC) applicable to the clinic
    - The knots correspond to the advent of study interventions.
    - An interaction term is included to facilitate testing the hypothesis of additive intervention effects on/after  $t=13$ .
  - Includes baseline fixed effect intercept adjustments for the health system and the clinic size

- The health system intercept impact is modeled as a fixed effect rather than a random effect, since there are only two health systems in the study.
- The clinic size term was included because clinic size was a stratification variable that might have an impact on outcomes.
- Note that these terms cancel when considering changes in outcome values over time. So, these terms have no direct role in explaining the impact of the study interventions.

- The random effects determine the correlation structure of the observed values
  - As with the health-system-level adjustments, the clinic-level random effects are limited to intercept adjustments. Given the presence of PCP-level random intercept and slope effects, it was found that clinic-level intercept effects were modest and clinic-level slope effects were not needed. Again, the clinic-level random intercept effects cancel when considering changes in outcomes over time.
  - The PCP-level random intercept effect and two slope effects are assumed to be iid Normal with variance-covariance matrix  $\Sigma_v$ , where the intercept and slope effects for a specific PCP are allowed to be correlated, as determined by the data in the model fitting. For example, the intercept and slope effects might be negatively correlated so that a positive deviation in the outcome level for a PCP level would generally be associated with a negative deviation in one or both of the slopes.
  - The random PCP-level intercept generates positive correlation among the outcome observations over time from the same PCP. Without the random PCP-level slope effects, this correlation would be roughly constant regardless of the time interval between the observations. The random PCP-level slope effects generally cause the positive correlation to shrink as the time interval increases.
  - The random PCP-level slope effects also model the variation in intervention impact from PCP to PCP. As with the system-level and clinic-level intercept effects, the PCP-level intercept effects cancel out when considering any changes in outcomes over time.
  - The fixed effect slope estimates are based, in large part, on the observed quarterly changes in outcomes for each PCP. Without the random slope effects, such quarterly changes would each be viewed by the model (after accounting for the differences in independent error terms) as an independent estimator of the underlying fixed effect slope. The random slope structure introduces positive correlation among quarterly changes from the same PCP (again, as determined by the data in model fitting), reducing the effective sample size (power) of the resulting slope estimates, resulting in larger p-values for tests of intervention impact.
- Note that all random effects are assumed to have variances unaffected by the number of patients associated with the clinic or PCP. This structure could be generalized in future modeling to allow the variance, in whole or part, to be inversely proportional to the number of opioid patients managed by the clinic or PCP. This could be accomplished by dividing the spline component (i.e., the constant 1 column or the  $t_7$  and/or  $t_{13}$  columns in the design matrix) by the square root of the number of opioid patients for the clinic or PCP.

So,  $u(ij) + v_0(ijk) + v_1(ijk) t_7 + v_2(ijk) t_{13}$  might become,

$$u(ij)/n(ij)^{1/2} + [v_0(ijk) + v_1(ijk) t_7 + v_2(ijk) t_{13}]/n(ijk)^{1/2},$$

where  $n(ij)$  is the average opioid patient count for clinic  $ij$ , and,  
 $n(ijk)$  is the average opioid patient count for PCP  $ijk$ , and,  
 the variances of  $u()$  and  $v()$  are constant wrt  $n(ij)$  and  $n(ijk)$ .

- The model error term does assume the variance is inversely proportional to the number of opioid patients underlying each observation. All of the outcome measures are averages of values for each underlying opioid patient. If the patient-to-patient outcome variation from the model fixed and random effects are assumed independent, then this variance structure is appropriate. In the absence of random effects, this would result in fixed effect estimates based on weighted averages of system/clinic/PCP outcomes, where the weight assigned to each value would be the opioid patient count in the denominator of the measure. With the random effects having variances that don't vary by clinic or PCP, the model uses a blend of unweighted and weighted averages.



- Model Estimation
  - SAS Proc Mixed was used to estimate the model for each outcome measure
    - Average MME per day for most recent 3 months
    - Percent of patients with average MME greater than or equal to 90 mg/day
    - Percent of patients with urine drug screen in last 12 months
    - Percent of patients with treatment in last 12 months
    - Percent of patients with PHQ-9 depression screen in last 12 months
    - Percent of patients with PEG-3 pain screen in last 12 months
  - The same model structure was employed with each outcome measure
    - See model structure above
    - Method = REML, residual/restricted maximum likelihood estimation, which produces less biased variance/covariance parameter estimates than conventional maximum likelihood estimation
    - Intervention interaction term was retained throughout, even if found to be statistically insignificant
  - Best Linear Unbiased Predictors (BLUPs) can be generated for each PCP, if needed for secondary analyses. This might be a useful basis for obtaining estimates for missing values.



- Table of Intervention Effect Estimates

| Estimated Impact of Study Interventions (3-Mth Opioid Patients) |          |         |                  |           |                 |                     |                 |                 | Aggregated p-values |                         |                    |
|-----------------------------------------------------------------|----------|---------|------------------|-----------|-----------------|---------------------|-----------------|-----------------|---------------------|-------------------------|--------------------|
| Contrast                                                        | Item     | Avg MME | MME >= 90 mg/day | Benzo Use | Urine Screening | Treatment Agreement | PHQ-9 Screening | PEG-3 Screening | Min p-value         | Number of p-values ≤ 5% | Geom. Mean p-value |
| No-Intervention 18-Mth Chg                                      | Estimate | -1.50   | -1.9%            | -1.1%     | 13.3%           | 16.2%               | 16.5%           | 4.5%            | 0.07%               | 0.02%                   | 0.00%              |
|                                                                 | Std Dev  | 1.28    | 0.9%             | 1.0%      | 2.8%            | 3.1%                | 3.0%            | 2.3%            |                     |                         |                    |
|                                                                 | p-value  | 0.2425  | 0.0249           | 0.2936    | <.0001          | <.0001              | <.0001          | 0.0547          |                     |                         |                    |
| PF Only 18-Mth Chg                                              | Estimate | -1.30   | -1.3%            | -0.5%     | 2.3%            | 11.3%               | 13.3%           | 17.7%           | 0.07%               | 0.38%                   | 0.00%              |
|                                                                 | Std Dev  | 1.36    | 0.9%             | 1.1%      | 2.9%            | 3.2%                | 3.1%            | 2.4%            |                     |                         |                    |
|                                                                 | p-value  | 0.3380  | 0.1605           | 0.6505    | 0.4226          | 0.0004              | <.0001          | <.0001          |                     |                         |                    |
| PF Only vs No-Intervention                                      | Estimate | 0.20    | 0.7%             | 0.6%      | -11.0%          | -4.9%               | -3.2%           | 13.2%           | 0.07%               | 4.44%                   | 0.16%              |
|                                                                 | Std Dev  | 1.83    | 1.2%             | 1.5%      | 4.0%            | 4.3%                | 4.2%            | 3.3%            |                     |                         |                    |
|                                                                 | p-value  | 0.9145  | 0.5899           | 0.6962    | 0.0064          | 0.2576              | 0.4502          | <.0001          |                     |                         |                    |
| PPC Only 18-Mth Chg                                             | Estimate | -0.35   | -0.5%            | -1.1%     | 8.2%            | 3.5%                | 1.3%            | -0.3%           | 2.36%               | 30.17%                  | 17.08%             |
|                                                                 | Std Dev  | 1.32    | 0.9%             | 1.1%      | 2.8%            | 3.0%                | 3.0%            | 2.3%            |                     |                         |                    |
|                                                                 | p-value  | 0.7924  | 0.5993           | 0.3298    | 0.0034          | 0.2528              | 0.6606          | 0.9082          |                     |                         |                    |
| PPC Only vs No-Intervention                                     | Estimate | 1.15    | 1.5%             | 0.0%      | -5.1%           | -12.7%              | -15.2%          | -4.8%           | 0.07%               | 4.44%                   | 0.00%              |
|                                                                 | Std Dev  | 1.60    | 1.2%             | 1.4%      | 3.7%            | 3.7%                | 3.8%            | 2.8%            |                     |                         |                    |
|                                                                 | p-value  | 0.4721  | 0.1999           | 0.9943    | 0.1648          | 0.0007              | <.0001          | 0.0869          |                     |                         |                    |
| PF Only (18 mths) vs PPC Only (12 mths)                         | Estimate | -0.96   | -0.8%            | 0.6%      | -5.9%           | 7.8%                | 12.0%           | 17.9%           | 0.07%               | 4.44%                   | 0.02%              |
|                                                                 | Std Dev  | 1.85    | 1.2%             | 1.5%      | 4.0%            | 4.3%                | 4.2%            | 3.3%            |                     |                         |                    |
|                                                                 | p-value  | 0.6065  | 0.5118           | 0.7100    | 0.1431          | 0.0689              | 0.0046          | <.0001          |                     |                         |                    |
| PF Only (12 mths) vs PPC Only (12 mths)                         | Estimate | -0.18   | -0.4%            | -0.2%     | -6.8%           | 11.1%               | 12.6%           | 12.9%           | 0.07%               | 0.38%                   | 0.00%              |
|                                                                 | Std Dev  | 1.68    | 1.2%             | 1.6%      | 3.8%            | 3.9%                | 3.9%            | 2.8%            |                     |                         |                    |
|                                                                 | p-value  | 0.9153  | 0.7369           | 0.9228    | 0.0790          | 0.0044              | 0.0012          | <.0001          |                     |                         |                    |
| PF & PPC 18-Mth Chg                                             | Estimate | -2.42   | -1.3%            | -0.3%     | -1.1%           | 2.3%                | 11.2%           | 8.6%            | 0.21%               | 4.44%                   | 0.01%              |
|                                                                 | Std Dev  | 1.40    | 0.9%             | 1.2%      | 2.9%            | 3.2%                | 3.1%            | 2.4%            |                     |                         |                    |
|                                                                 | p-value  | 0.0847  | 0.1541           | 0.7872    | 0.7053          | 0.4586              | 0.0004          | 0.0003          |                     |                         |                    |
| PF & PPC vs No-Intervention                                     | Estimate | -0.93   | 0.6%             | 0.8%      | -14.4%          | -13.8%              | -5.3%           | 4.1%            | 0.28%               | 4.44%                   | 0.06%              |
|                                                                 | Std Dev  | 1.86    | 1.3%             | 1.5%      | 4.0%            | 4.3%                | 4.3%            | 3.3%            |                     |                         |                    |
|                                                                 | p-value  | 0.6195  | 0.6339           | 0.6180    | 0.0004          | 0.0014              | 0.2133          | 0.2178          |                     |                         |                    |
| PF & PPC Interaction                                            | Estimate | -2.27   | -1.5%            | 0.2%      | 1.6%            | 3.7%                | 13.1%           | -4.3%           | 11.12%              | 30.17%                  | 25.20%             |
|                                                                 | Std Dev  | 2.35    | 1.7%             | 2.1%      | 5.3%            | 5.4%                | 5.5%            | 4.0%            |                     |                         |                    |
|                                                                 | p-value  | 0.3332  | 0.3584           | 0.9331    | 0.7571          | 0.4871              | 0.0167          | 0.2850          |                     |                         |                    |

- The row categories within the table correspond to the estimated change in the fixed effect curve from baseline to the end of the intervention period (18 months later) within and between the four study arms. Each category includes three detail rows, showing the estimated 18-month change (or the difference in 18-month changes from one arm to another), the standard deviation of the estimated value, and the p-value of the estimate (i.e., testing the null hypothesis that the true value is zero). Significant p-values (i.e., those less than or equal to 5%) are highlighted in gray and the corresponding estimated changes (or differences in changes) are highlighted in green (if the direction of the change is favorable) or orange (if the direction of the change is unfavorable).
- Note that the final row category focuses on the magnitude and statistical significance of the model interaction term. If this term can be taken to be zero, the two intervention effects are considered additive.
- The columns of the table focus on each of the seven primary model outcomes. The final columns provide three different aggregate p-values that can be used to assess the null hypothesis that the true changes (or differences in changes) for all seven of the row category outcomes are

uniformly zero.

- Although the PHQ-9 screening outcome has an interaction term p-value less than 5% (i.e., 1.67%), all three of the aggregated p-values for the test that all interaction effects are zero are greater than 10%. That is, observing one of seven outcome p-values below 5% is not unexpected even if all seven of the true effects are zero. So, we can't reject the assumption that the PF and PPC intervention effects, if any, are additive.
- Note that each of the other row categories (other than the interaction term category) have at least one significant aggregate p-value, indicating that at least one of the outcomes has a statistically significant estimated change (or difference in change). We now consider each of the seven outcomes for the "3-Mth Opioid Patient" population.

- Average MME
  - There are no statistically significant changes in average MME levels from baseline to the end of the intervention period for any study arm or difference in study arms.
  - All four study arms had estimated changes that were negative (but not statistically significant).
- Percent of patients with MME less than or equal to 90 mg per day
  - Only the baseline arm had a statistically significant reduction (-1.9% with p-value of 2.5%).
  - The remaining three arms had insignificant reductions.
- Percent of patients with co-prescribed Benzodiazepine in the last quarter
  - Similar to average MME levels, there were estimated reductions for all four arms, but none of these reductions were statistically significant.
- Percent of patients with urine drug screening in the last 12 months
  - The no-intervention arm and the PPC-only arm both had significant increases in drug screening rates (13.3% and 8.2%, respectively). The PF-only and PF&PPC arms had no significant change.
  - Consequently, the difference between the PF-only arm and the no-intervention arm changes was negative (-11.0%) and significant (p-value of 0.6%).
  - Similarly, the difference between the PF&PPC arm and the no-intervention arm changes was negative (-14.4%) and significant (p-value of 0.04%).
- Percent of patients with a treatment agreement in the last 12 months
  - The no-intervention arm and the PF-only arm both had significant increases in treatment agreement rates (16.2% and 11.3%, respectively). The PPC-only and PF&PPC arms had no significant change.
  - Consequently, the difference between the PPC-only arm and the no-intervention arm changes was negative (-12.7%) and significant (p-value of 0.07%).
  - Similarly, the difference between the PF&PPC arm and the no-intervention arm changes was negative (-13.8%) and significant (p-value of 0.14%).
- Percent of patients with a PHQ-8/9 depression screening in last 12 months
  - The no-intervention arm, the PF-only arm and the PF&PPC arms all had significant increases in depression screening rates (16.5%, 13.3% and 11.2%, respectively). The PPC-only arm had no significant change.
  - Consequently, the difference between the PPC-only arm and the no-intervention arm changes was negative (-15.2%) and significant (p-value < 0.01%).
  - The differences between the PF-only, PF&PPC and the no-intervention arm changes were not statistically significant.
- Percent of patients with a PEG-3 pain screening in the last 12 months
  - The PF-only and PF&PPC arms had significant improvements (17.7% and 8.6%, respectively) in pain screening rates.
  - The no-intervention arm had an insignificant improvement and the PPC-only arm had an insignificant decrease.
  - The PF-only arm improvement was significantly greater than the no-intervention arm (13.2% with a p-value < 0.01%).

- The PF&PPC arm improvement was not significantly greater than the no-intervention arm improvement (4.1% with a p-value of 22%).

| Estimated Impact of Study Interventions (All Opioid Patients) |          |         |                  |           |                 |                     |                 |                 | Aggregated p-values |                         |                    |
|---------------------------------------------------------------|----------|---------|------------------|-----------|-----------------|---------------------|-----------------|-----------------|---------------------|-------------------------|--------------------|
| Contrast                                                      | Item     | Avg MME | MME >= 90 mg/day | Benzo Use | Urine Screening | Treatment Agreement | PHQ-9 Screening | PEG-3 Screening | Min p-value         | Number of p-values ≤ 5% | Geom. Mean p-value |
| No-Intervention 18-Mth Chg                                    | Estimate | -1.09   | -0.9%            | -0.8%     | 6.8%            | 7.7%                | 13.6%           | 2.0%            | 0.07%               | 0.38%                   | 0.00%              |
|                                                               | Std Dev  | 0.71    | 0.6%             | 0.6%      | 1.6%            | 1.6%                | 2.1%            | 1.8%            |                     |                         |                    |
|                                                               | p-value  | 0.1276  | 0.1214           | 0.1806    | <.0001          | <.0001              | <.0001          | 0.2682          |                     |                         |                    |
| PF Only 18-Mth Chg                                            | Estimate | -2.39   | -1.2%            | -0.6%     | 0.5%            | 4.6%                | 11.8%           | 12.3%           | 0.07%               | 0.00%                   | 0.00%              |
|                                                               | Std Dev  | 0.70    | 0.5%             | 0.6%      | 1.5%            | 1.6%                | 2.1%            | 1.8%            |                     |                         |                    |
|                                                               | p-value  | 0.0007  | 0.0229           | 0.3052    | 0.7319          | 0.0049              | <.0001          | <.0001          |                     |                         |                    |
| PF Only vs No-Intervention                                    | Estimate | -1.31   | -0.4%            | 0.2%      | -6.3%           | -3.1%               | -1.9%           | 10.2%           | 0.07%               | 4.44%                   | 0.03%              |
|                                                               | Std Dev  | 0.96    | 0.7%             | 0.8%      | 2.2%            | 2.3%                | 3.0%            | 2.6%            |                     |                         |                    |
|                                                               | p-value  | 0.1757  | 0.6028           | 0.8160    | 0.0037          | 0.1668              | 0.5304          | <.0001          |                     |                         |                    |
| PPC Only 18-Mth Chg                                           | Estimate | -2.72   | -2.0%            | -0.9%     | 4.2%            | 1.7%                | 5.4%            | -0.1%           | 0.21%               | 0.02%                   | 0.00%              |
|                                                               | Std Dev  | 0.74    | 0.6%             | 0.7%      | 1.5%            | 1.6%                | 2.1%            | 1.8%            |                     |                         |                    |
|                                                               | p-value  | 0.0003  | 0.0006           | 0.1626    | 0.0061          | 0.2973              | 0.0102          | 0.9751          |                     |                         |                    |
| PPC Only vs No-Intervention                                   | Estimate | -1.64   | -1.1%            | -0.1%     | -2.7%           | -6.1%               | -8.2%           | -2.1%           | 0.98%               | 4.44%                   | 0.02%              |
|                                                               | Std Dev  | 0.92    | 0.7%             | 0.8%      | 2.0%            | 1.9%                | 2.6%            | 1.9%            |                     |                         |                    |
|                                                               | p-value  | 0.0766  | 0.1254           | 0.9138    | 0.1834          | 0.0018              | 0.0014          | 0.2673          |                     |                         |                    |
| PF Only (18 mths) vs PPC Only (12 mths)                       | Estimate | 0.33    | 0.8%             | 0.3%      | -3.7%           | 2.9%                | 6.3%            | 12.3%           | 0.07%               | 4.44%                   | 0.07%              |
|                                                               | Std Dev  | 0.99    | 0.8%             | 0.9%      | 2.1%            | 2.2%                | 3.0%            | 2.6%            |                     |                         |                    |
|                                                               | p-value  | 0.7380  | 0.3179           | 0.7416    | 0.0888          | 0.1883              | 0.0321          | <.0001          |                     |                         |                    |
| PF Only (12 mths) vs PPC Only (12 mths)                       | Estimate | 0.52    | 0.4%             | 0.8%      | -4.6%           | 5.2%                | 6.5%            | 8.5%            | 0.07%               | 0.02%                   | 0.00%              |
|                                                               | Std Dev  | 0.97    | 0.8%             | 0.9%      | 2.0%            | 1.9%                | 2.6%            | 1.9%            |                     |                         |                    |
|                                                               | p-value  | 0.5948  | 0.5976           | 0.3578    | 0.0227          | 0.0077              | 0.0113          | <.0001          |                     |                         |                    |
| PF & PPC 18-Mth Chg                                           | Estimate | -3.49   | -1.4%            | -0.2%     | -0.4%           | 1.1%                | 13.5%           | 7.4%            | 0.07%               | 0.02%                   | 0.00%              |
|                                                               | Std Dev  | 0.73    | 0.6%             | 0.6%      | 1.5%            | 1.6%                | 2.1%            | 1.8%            |                     |                         |                    |
|                                                               | p-value  | <.0001  | 0.0131           | 0.7715    | 0.7840          | 0.5087              | <.0001          | <.0001          |                     |                         |                    |
| PF & PPC vs No-Intervention                                   | Estimate | -2.40   | -0.6%            | 0.6%      | -7.3%           | -6.7%               | -0.1%           | 5.4%            | 0.56%               | 0.02%                   | 0.01%              |
|                                                               | Std Dev  | 0.99    | 0.8%             | 0.9%      | 2.2%            | 2.2%                | 3.0%            | 2.6%            |                     |                         |                    |
|                                                               | p-value  | 0.0152  | 0.4536           | 0.4607    | 0.0008          | 0.0031              | 0.9753          | 0.0350          |                     |                         |                    |
| PF & PPC Interaction                                          | Estimate | 0.54    | 1.0%             | 0.5%      | 1.7%            | 2.5%                | 10.0%           | -2.7%           | 4.06%               | 30.17%                  | 14.45%             |
|                                                               | Std Dev  | 1.30    | 1.0%             | 1.2%      | 2.8%            | 2.7%                | 3.6%            | 2.7%            |                     |                         |                    |
|                                                               | p-value  | 0.6756  | 0.3601           | 0.6522    | 0.5462          | 0.3582              | 0.0059          | 0.3081          |                     |                         |                    |

- Note that each of row categories (including the interaction term category) have at least one significant aggregate p-value, indicating that at least one of the outcomes has a statistically significant estimated change (or difference in change). We now consider each of the seven outcomes for the “All Opioid Patient population”.
  - Average MME
    - There is a negative, but not statistically significant, change in average MME level from baseline to the end of the intervention period for the no-intervention study arm. All three of the intervention study arms have statistically significant reductions in average MME. Only the difference between the PF & PPC arm reduction and the no-intervention arm reduction is statistically significant.
  - Percent of patients with MME less than or equal to 90 mg per day
    - There is a negative, but not statistically significant, change in the percent of patients with MME above 90 mg per day from baseline to the end of the intervention period for the no-intervention study arm. All three of the intervention study arms have

statistically significant reductions in the percent of patients above 90 mg/day. However, none of the differences between the intervention arm reductions and the no-intervention arm reduction are statistically significant.

- The remaining three arms had insignificant reductions.
- Percent of patients with co-prescribed Benzodiazepine in the last quarter
  - There are estimated reductions for all four arms, but none of these reductions are statistically significant.
- Percent of patients with urine drug screening in the last 12 months
  - The no-intervention arm and the PPC-only arm both had significant increases in drug screening rates (6.8% and 4.2%, respectively). The PF-only and PF&PPC arms had no significant change.
  - The difference between the PPC-only arm and the no-intervention arm was negative, but statistically insignificant.
  - The difference between the PF-only arm and the no-intervention arm changes was negative (-6.3%) and significant (p-value of 0.4%).
  - Similarly, the difference between the PF&PPC arm and the no-intervention arm changes was negative (-7.3%) and significant (p-value of 0.08%).
- Percent of patients with a treatment agreement in the last 12 months
  - The no-intervention arm and the PF-only arm both had significant increases in treatment agreement rates (7.7% and 4.6%, respectively). The PPC-only and PF&PPC arms had no significant change.
  - The difference between the PF-only arm and the no-intervention arm was negative, but statistically insignificant.
  - Consequently, the difference between the PPC-only arm and the no-intervention arm changes was negative (-6.1%) and significant (p-value of 0.18%).
  - Similarly, the difference between the PF&PPC arm and the no-intervention arm changes was negative (-6.7%) and significant (p-value of 0.31%).
- Percent of patients with a PHQ-8/9 depression screening in last 12 months
  - The no-intervention arm, the PF-only arm, the PPC-only, and the PF&PPC arms all had significant increases in depression screening rates (13.6%, 11.8%, 5.4% and 13.5%, respectively).
  - The difference between the PPC-only arm and the no-intervention arm was negative (-8.2%) and statistically significant (p-value of 0.14%).
  - The differences between the PF-only, PF&PPC and the no-intervention arm changes were not statistically significant.
- Percent of patients with a PEG-3 pain screening in the last 12 months
  - The PF-only and PF&PPC arms had significant improvements (12.3% and 7.4%, respectively) in pain screening rates.
  - The no-intervention arm had an insignificant improvement and the PPC-only arm had an insignificant decrease.
  - The PF-only arm improvement was significantly greater than the no-intervention arm (10.2% with a p-value < 0.01%).
  - The PF&PPC arm improvement was also significantly greater than the no-intervention arm improvement (5.4% with a p-value of 3.5%).

## Appendix A – Primary Model Results (3-Mth Opioid Patients)

- This appendix summarizes key model results for each outcome measure
  - Graphs of PCP outcome changes over the 18-month intervention period by study arm
    - Outcome change for each PCP vs. number of opioid patients for PCP
    - Cumulative distribution function of PCP outcome change, weighted by number of opioid patients for each PCP
  - Time series plot of weighted average quarterly outcomes by study arm
    - Average plus/minus 1 standard deviation (standard deviation of weighted average assuming independent patients within PCP) This provides some sense of the reliability (or lack thereof) of any exhibited trends without requiring any model assumptions
    - Note that the four study arms are grouped into two arms (PF vs. non-PF) in the first six months when only the PF intervention is being applied.
    - Baseline values for each PCP are subtracted to display changes from baseline to each quarterly observation date.
  - Table and time series plot of fitted fixed effect trends (again, changes from baseline)
    - Table includes standard deviation of quarterly fixed effect estimates
    - Table includes differences between intervention arm results and the no-intervention arm, including standard deviations and t-ratios for the differences
    - Time series plot only shows fitted fixed-effect spline for each study arm
  - SAS Proc Mixed output tables and graphs
    - Random effect and error term variance/covariance estimates
    - Fixed effect estimates
    - Variety of fixed effect contrasts relating to the significance of intervention effects
    - Residual plots (marginal and conditional)
      - Marginal residuals are estimates of  $u(ij) + v_0(ijk) + v_1(ijk) t_7 + v_2(ijk) t_{13} + \varepsilon(ijkt)$ .
      - Conditional residuals are estimates of  $\varepsilon(ijkt)$ .



## Appendix A1 – Average MME Prescribed in Last 3 Months

The first graph below shows a scatter plot of study PCP values. The horizontal axis is the observed (not fitted) change in the outcome (average MME in this case) from baseline to the end of the 18-month intervention period. Values on this axis range from a decrease of 50 mg/day to an increase of 50 mg/day. The vertical axis displays the number of opioid patients associated with the PCP. The color of the plotted points indicates the study arm to which the PCP is assigned. The intent is to provide a visual sense of the variation of outcome changes observed by PCP and how that variation is affected by study arm and the size of the PCP's opioid patient cohort.

Note that the arms are labeled “00” for the no-intercept arm, “01” for the PPC-only arm, “10” for the PF-only arm and “11” for the PF & PPC arm.

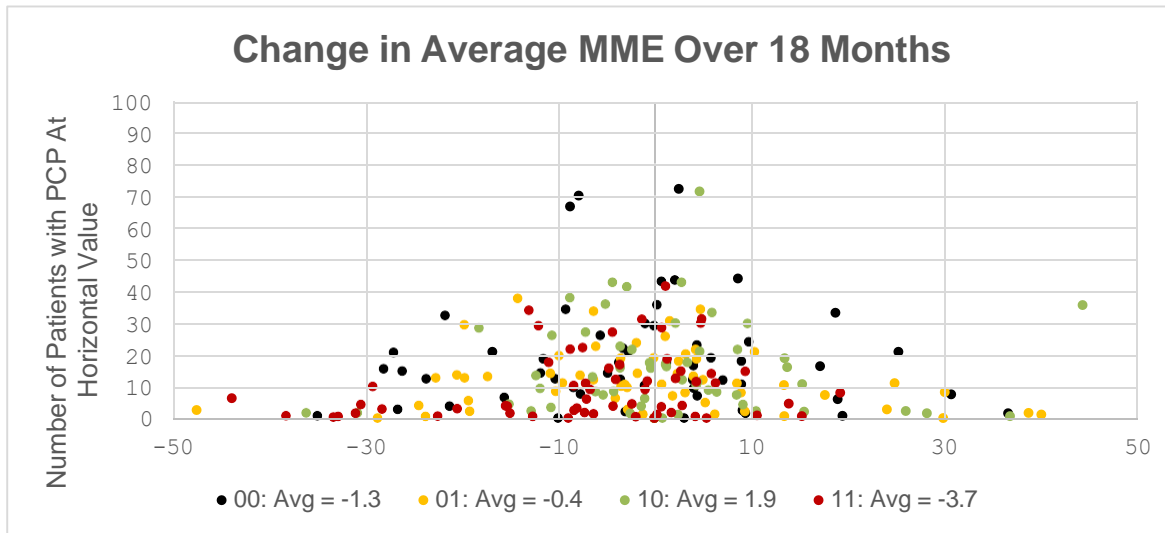

To provide a better sense of the difference in the distribution of PCP outcome changes, the following graph shows the cumulative distribution function for each of the four study arms.

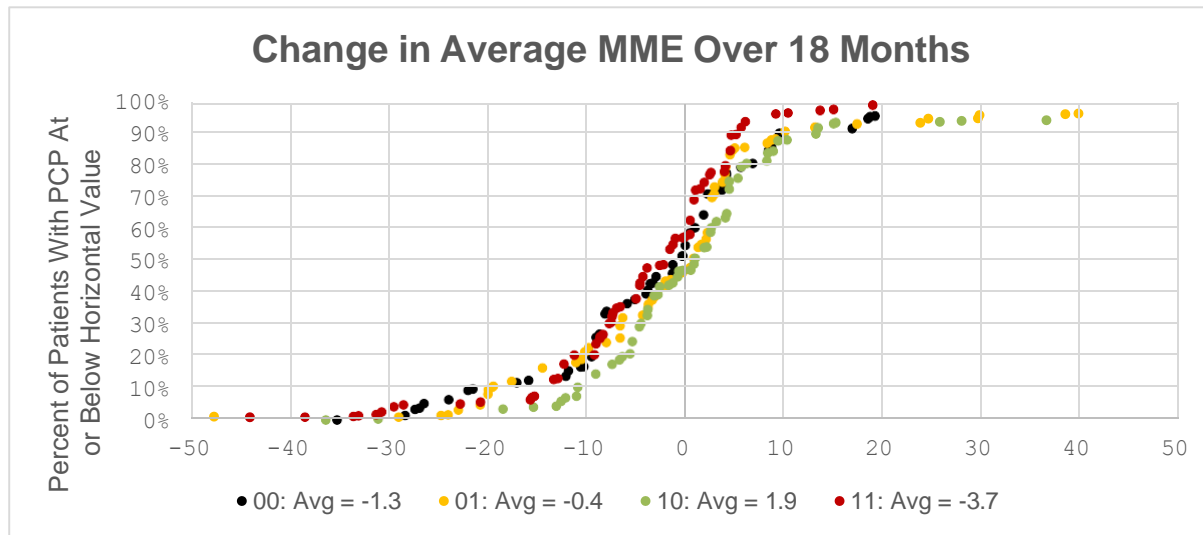

All four arms exhibit a similar wide-ranging distribution of average MME changes from t=0 to t=18. Nevertheless, there are some modest differences. For example, the red dots tends to be further to the left, indicating that the PF & PPC arm has slightly smaller (more negative) changes in average MME compared to PCPs in other study arms.

The graph below displays the progression of changes in observed average MME values by arm over time. There are two lines for each arm, representing the arm average observed change in MME plus or minus one standard deviation. So, for example, the two red lines indicate that at t=3 roughly 2/3 of the observed changes in average MME for PCPs in the PF & PPC study arm were in the range from -1.2 mg/day to 0.5 mg/day. By t=18, this 2/3 capture band shifted to a range from -4.5 mg/day to -0.5 mg/day. The average result for each arm is the mid-point of the band. The intent is to convey the trend for each arm while also showing the overlapping range of PCP-specific values.

Note that the no-intervention and PPC-only bands are combined through t=6, since no intervention implemented for either during this period. Similarly, the PF-only and PF & PPC arms are combined through t=6, since both are subject to only the PF intervention during this period.

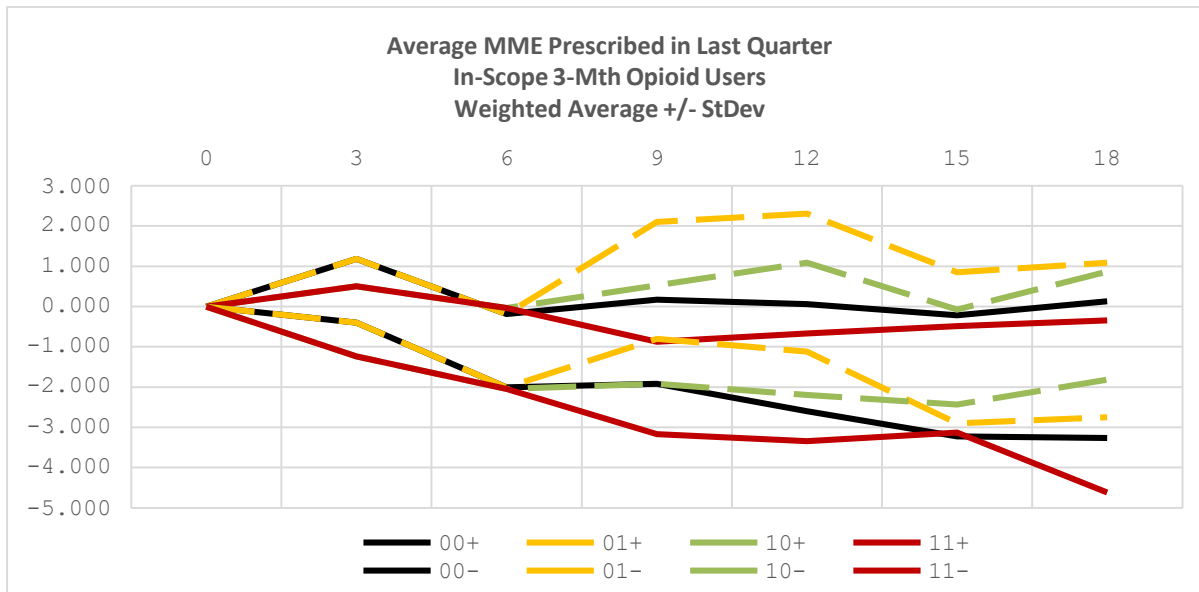

The graph below shows the fitted model estimates for the change in outcome by arm. These fitted curves can be compared to the progression of observed outcomes in the previous graph to provide a sense of the variation of the PCP-level source data to which the estimated curves are fitted.

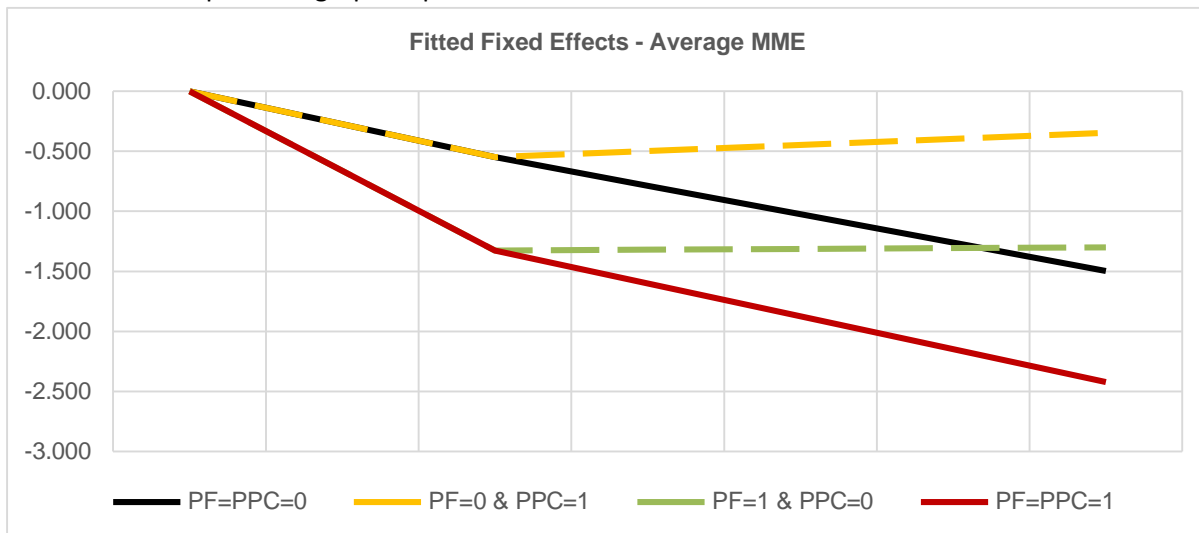

The table below provides additional model output related to the previous graph of fitted changes to outcomes (average MME in this case). The top portion of second through fifth columns show the numerical values of the estimated changes in the previous graph. The next portion below shows the estimated standard deviation related to each of the estimated outcome changes in the top portion. The final portion at the bottom shows the corresponding t-ratios associated with testing the null hypothesis that the true change from baseline is zero. So, for example, the PF & PPC arm shows an estimated change from t=0 to t=18 in average MME of -2.422 mg/day. This value has an estimated standard deviation of 1.404 mg/day. This implies the estimated values is -1.73 standard deviations from zero (the t-ratio). Roughly speaking, t-ratios greater than 2.00 in absolute value might be considered statistically significant and providing support to reject the null hypothesis of a zero true change in the outcome.

The three columns on the right side of the table show the differences between the estimated changes for each of the three intervention arms and the no-intervention arm. The appropriate standard deviations and t-ratios for these differences in changes are included. So, for example, the PF & PPC arm has an estimated 18-month decrease in average MME from baseline that is 0.925 mg/day greater than the change for the no-intervention arm. The corresponding standard deviation is 1.863 mg/day and the resulting t-ratio is only 0.5 standard deviations from zero. So, while there is some evidence that the PF & PPC arm experienced a greater drop in average MME than the no-intervention arm, that difference is not statistically significant.

| <b>Average MME</b>                  |                               |              |              |          |                             |                             |                         |
|-------------------------------------|-------------------------------|--------------|--------------|----------|-----------------------------|-----------------------------|-------------------------|
| Study Month                         | Estimated Fixed Effect Curves |              |              |          | Differences                 |                             |                         |
|                                     | PF=PPC=0                      | PF=0 & PPC=1 | PF=1 & PPC=0 | PF=PPC=1 | PF=0 & PPC=1 minus PF=PPC=0 | PF=1 & PPC=0 minus PF=PPC=0 | PF=PPC=1 minus PF=PPC=0 |
| 0                                   | 0.000                         | 0.000        | 0.000        | 0.000    | 0.000                       | 0.000                       | 0.000                   |
| 3                                   | -0.275                        | -0.275       | -0.663       | -0.663   | 0.000                       | -0.388                      | -0.388                  |
| 6                                   | -0.550                        | -0.550       | -1.326       | -1.326   | 0.000                       | -0.776                      | -0.776                  |
| 9                                   | -0.787                        | -0.499       | -1.320       | -1.600   | 0.288                       | -0.533                      | -0.813                  |
| 12                                  | -1.024                        | -0.448       | -1.313       | -1.874   | 0.576                       | -0.290                      | -0.851                  |
| 15                                  | -1.261                        | -0.397       | -1.307       | -2.148   | 0.863                       | -0.047                      | -0.888                  |
| 18                                  | -1.498                        | -0.346       | -1.301       | -2.422   | 1.151                       | 0.197                       | -0.925                  |
| <b>Std Dev of Estimated Values</b>  |                               |              |              |          |                             |                             |                         |
| 0                                   | 0.000                         | 0.000        | 0.000        | 0.000    | 0.000                       | 0.000                       | 0.000                   |
| 3                                   | 0.393                         | 0.393        | 0.423        | 0.423    | 0.000                       | 0.561                       | 0.561                   |
| 6                                   | 0.785                         | 0.785        | 0.845        | 0.845    | 0.000                       | 1.122                       | 1.122                   |
| 9                                   | 0.802                         | 0.795        | 0.855        | 0.849    | 0.400                       | 1.134                       | 1.130                   |
| 12                                  | 0.907                         | 0.907        | 0.961        | 0.965    | 0.800                       | 1.282                       | 1.285                   |
| 15                                  | 1.074                         | 1.090        | 1.138        | 1.161    | 1.200                       | 1.526                       | 1.543                   |
| 18                                  | 1.280                         | 1.315        | 1.357        | 1.404    | 1.600                       | 1.829                       | 1.863                   |
| <b>t-ratios of Estimated Values</b> |                               |              |              |          |                             |                             |                         |
| 0                                   |                               |              |              |          |                             |                             |                         |

|    |       |       |       |       |       |       |
|----|-------|-------|-------|-------|-------|-------|
| 3  | -0.70 | -0.70 | -1.57 | -1.57 | -0.69 | -0.69 |
| 6  | -0.70 | -0.70 | -1.57 | -1.57 | -0.69 | -0.69 |
| 9  | -0.98 | -0.63 | -1.54 | -1.89 | 0.72  | -0.47 |
| 12 | -1.13 | -0.49 | -1.37 | -1.94 | 0.72  | -0.23 |
| 15 | -1.17 | -0.36 | -1.15 | -1.85 | 0.72  | -0.03 |
| 18 | -1.17 | -0.26 | -0.96 | -1.73 | 0.72  | 0.11  |

The tables below are taken directly from the SAS PROC Mixed output.

The first table below summarizes the estimated model variances/covariances associated with the random effects and the model error term. The values on the right side show the corresponding standard deviations and correlation coefficients. In this case, for example, the clinic-level intercept random effect has a standard deviation of 1.63 mg/day, while the PCP-level intercept random effect has a standard deviation of 19.47 mg/day. That is, much of the observed variation arises at the PCP level. The PCP-level slope random effect standard deviations are 0.66 mg/day and 0.48 mg/day (both per month of intervention duration) for the first 6 months and the last 12 months of the intervention period, respectively. Note also that the PCP-level random effects are correlated. For example, the two slope effects are 85% negatively correlated, meaning that when the first slope effect is positive(negative), the second tends to be negative(positive).

The model error term has an estimated standard deviation of 22.92 mg/day. Recall, however, that this value must be adjusted by the number of opioid patients in the denominator of the observed outcome measure. So, if a PCP has 10 opioid patients, this residual standard deviation will be  $22.92/10^{1/2}$ , or 7.25 mg/day.

| Covariance Parameter Estimates |         |          |          |                       |  |        |
|--------------------------------|---------|----------|----------|-----------------------|--|--------|
| Cov Parm                       | Subject | Estimate |          | Std Dev & Correlation |  |        |
| Intercept                      | Clinic  | 2.7      | Clinic   | 1.63                  |  |        |
| UN(1,1)                        | PCP     | 379.2    |          |                       |  |        |
| UN(2,1)                        | PCP     | (3.71)   | PCP      | 19.47                 |  |        |
| UN(2,2)                        | PCP     | 0.432    |          | -29.0%                |  | 0.66   |
| UN(3,1)                        | PCP     | 1.78     |          | 19.0%                 |  | -85.3% |
| UN(3,2)                        | PCP     | (0.27)   |          | 0.48                  |  |        |
| UN(3,3)                        | PCP     | 0.232    |          |                       |  |        |
| Residual                       |         | 525.1    | Residual | 22.92                 |  |        |

The next table shows the estimated fixed effect coefficients. Here we can see the estimated health system intercept effects, i.e., 29.769 mg/day for Bellin and 46.526 mg/day for UW Health. We also see the estimated coefficient applied to the standardized clinic size. This clinic size effect is found to be insignificant for all study outcomes.

| Solution for Fixed Effects |           |          |                |     |         |         |
|----------------------------|-----------|----------|----------------|-----|---------|---------|
| Effect                     | system    | Estimate | Standard Error | DF  | t Value | Pr >  t |
| system                     | Bellin    | 29.769   | 2.251          | 802 | 13.23   | <.0001  |
| system                     | UW Health | 46.526   | 1.754          | 802 | 26.53   | <.0001  |
| clinic_size                |           | 0.000    | 0.000          | 802 | 0.10    | 0.919   |
| t7                         |           | -0.092   | 0.131          | 256 | -0.70   | 0.485   |
| PF_t7                      |           | -0.129   | 0.187          | 802 | -0.69   | 0.489   |
| t13                        |           | 0.013    | 0.169          | 204 | 0.07    | 0.940   |
| PF_t13                     |           | 0.211    | 0.247          | 802 | 0.85    | 0.393   |
| PPC_t13                    |           | 0.096    | 0.133          | 802 | 0.72    | 0.472   |
| PFandPPC_t13               |           | -0.189   | 0.196          | 802 | -0.97   | 0.333   |

The next table shows estimates for various 18-month changes in outcomes by study arm and differences among these changes. The p-value column indicates which of these changes or differences in changes are significant given the volume of data underlying the estimates. Note that the estimates, standard errors and t-values correspond to the 18-month values presented in the table above.

| <b>Estimates</b>                |                 |                       |           |                |                    |
|---------------------------------|-----------------|-----------------------|-----------|----------------|--------------------|
| <b>Label</b>                    | <b>Estimate</b> | <b>Standard Error</b> | <b>DF</b> | <b>t Value</b> | <b>Pr &gt;  t </b> |
| <b>NOINT Chg</b>                | -1.4976         | 1.2805                | 802       | -1.17          | 0.2425             |
| <b>PF Only Chg</b>              | -1.3013         | 1.3575                | 802       | -0.96          | 0.3380             |
| <b>PPC Only Chg</b>             | -0.3463         | 1.3150                | 802       | -0.26          | 0.7924             |
| <b>PF &amp; PPC Chg</b>         | -2.4232         | 1.4036                | 802       | -1.73          | 0.0847             |
| <b>PF Only vs NOINT</b>         | 0.1963          | 1.8287                | 802       | 0.11           | 0.9145             |
| <b>PPC Only vs NOINT</b>        | 1.1513          | 1.6002                | 802       | 0.72           | 0.4721             |
| <b>PF Only vs PPC Only 1</b>    | -0.9550         | 1.8534                | 802       | -0.52          | 0.6065             |
| <b>PF Only vs PPC Only 2</b>    | -0.1785         | 1.6768                | 802       | -0.11          | 0.9153             |
| <b>PF &amp; PPC Interaction</b> | -2.2732         | 2.3477                | 802       | -0.97          | 0.3332             |
| <b>PF &amp; PPC vs NOINT</b>    | -0.9255         | 1.8634                | 802       | -0.50          | 0.6195             |

The next two sets of plots display the behavior of the fitted model residuals. The first set focuses on marginal residuals, i.e., estimates of  $u(ij) + v_0(ijk) + v_1(ijk) t_7 + v_2(ijk) t_{13} + \varepsilon(ijkt)$ , the difference between the observed outcome and the fixed effect estimate. These residuals include estimated random effects together with the model error term. Since these random components have differing variances and are blended with varying weights, we don't expect these to necessarily have stable variances or to be distributed normally. Indeed, we see some heavy-tailed behavior in these plots.

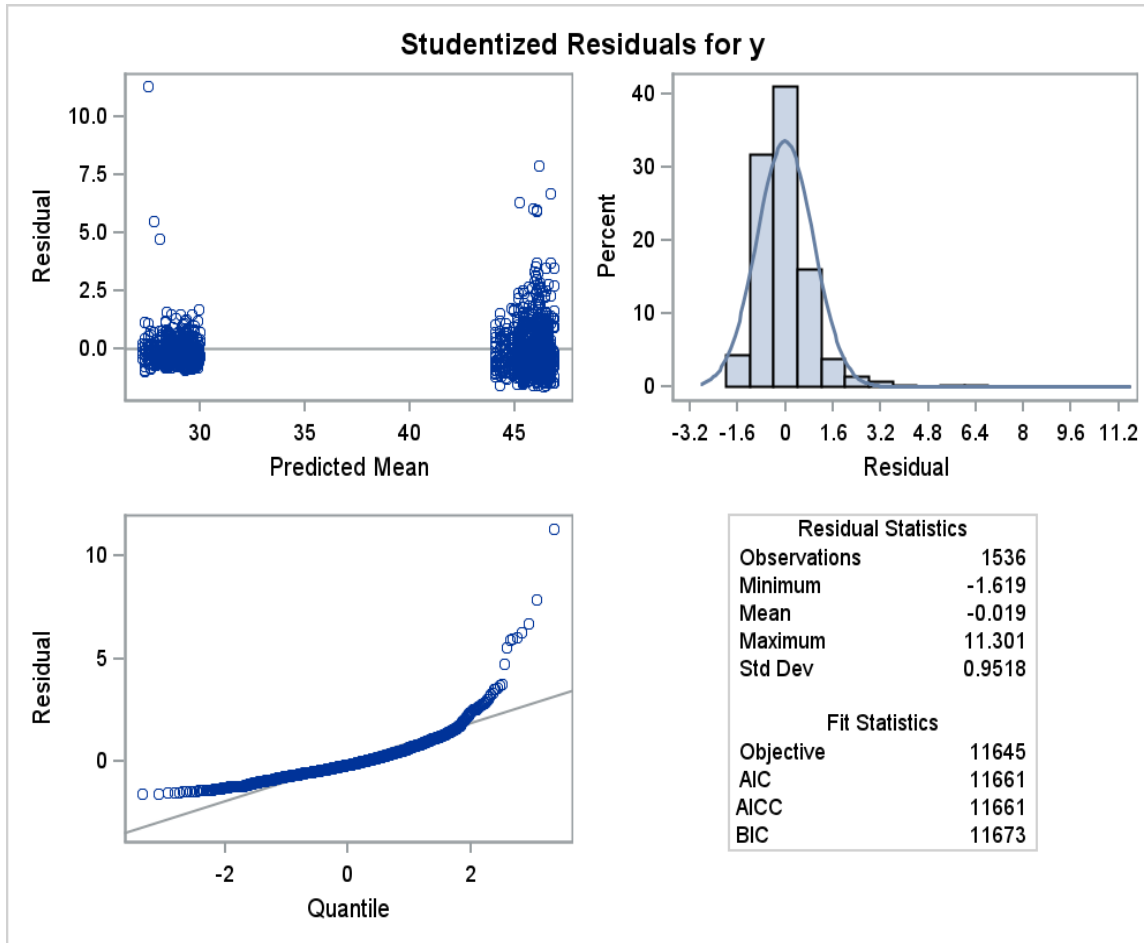



The second set of plots focuses on conditional residuals, i.e., estimates of the model error term  $\epsilon(ijkt)$  alone. These values are standardized, so provision has been made for the assumption that the error variance is inversely proportional to the number of opioid patients in the measure denominator. While the distribution appears more symmetric than the marginal residual plots, the tails appear heavier than would be expected with a Normal distribution. This indicates that the estimated model p-values may be under-stated (i.e., the significance of estimated effects may over-estimated). The increasing residual variance with increasing predicted values shown in the first plot below also suggests that a variance stabilizing transformation (such as a log) of the outcome variable might be appropriate (if we continued with additional model building steps).

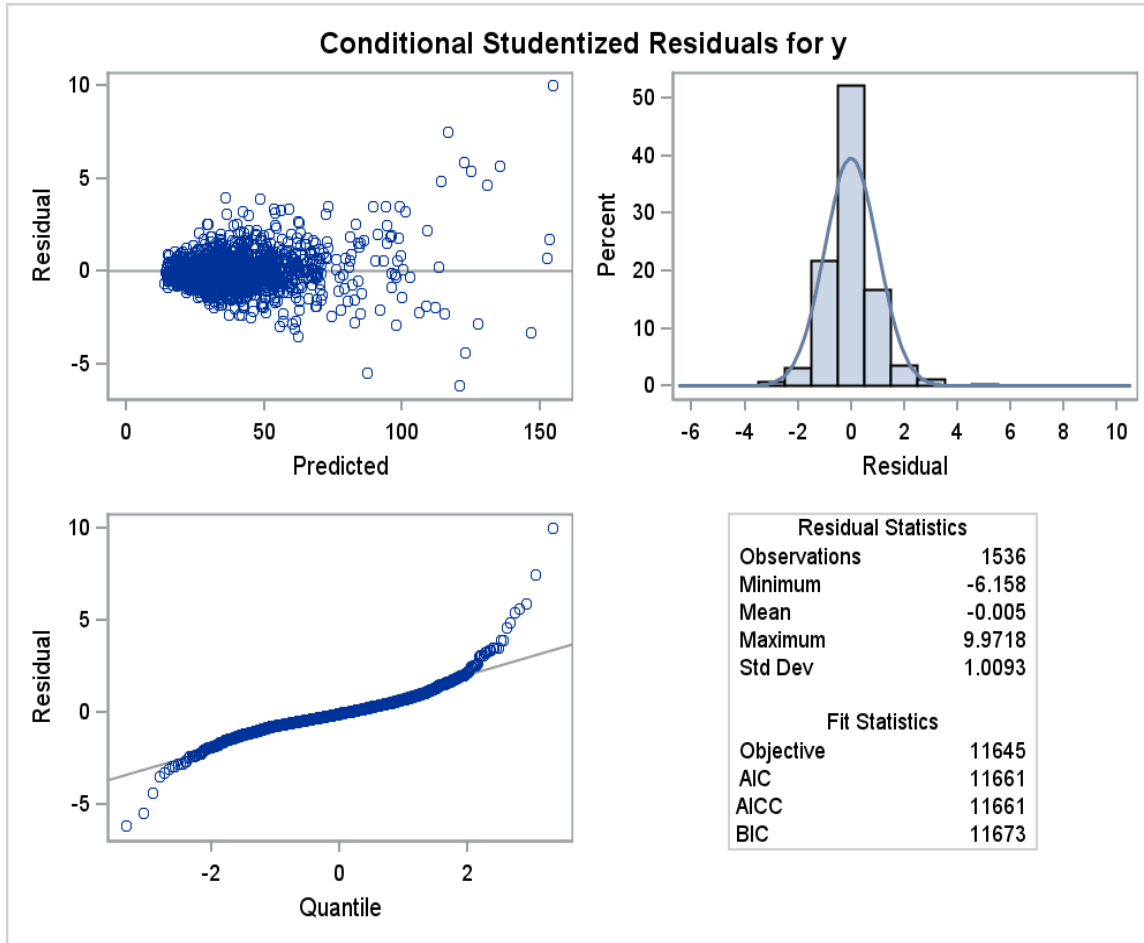

Appendix A2 – Percent of Opioid Patients with Average MME  $\geq$  90 mg/day

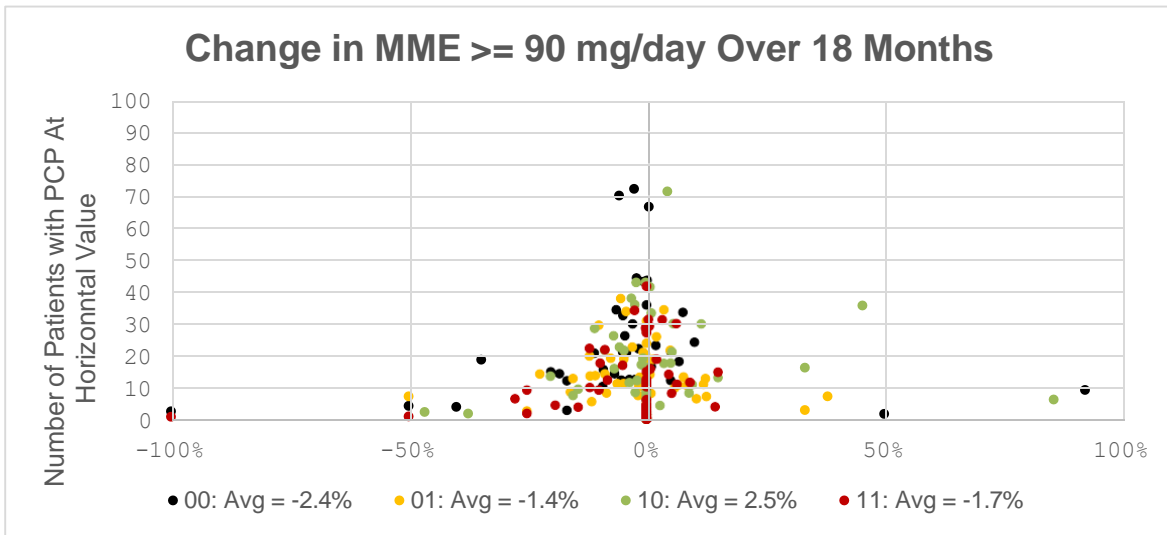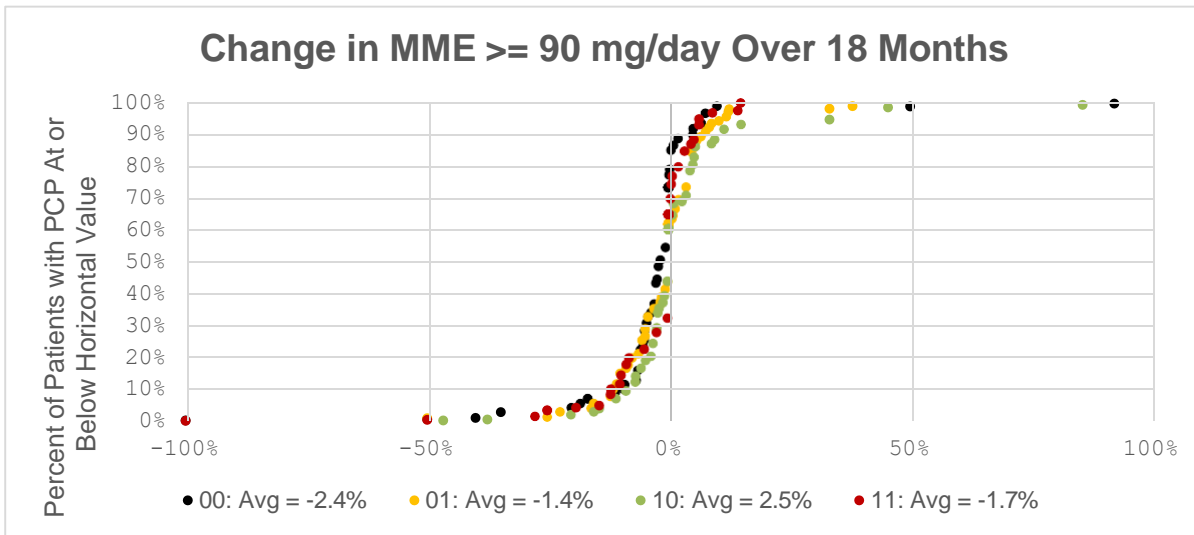

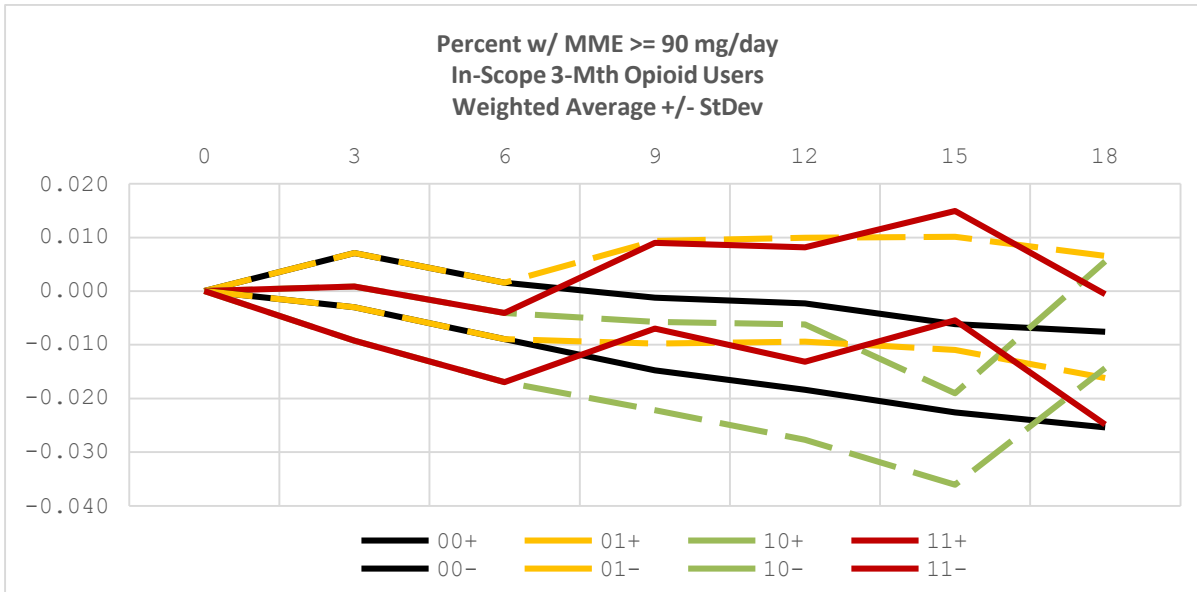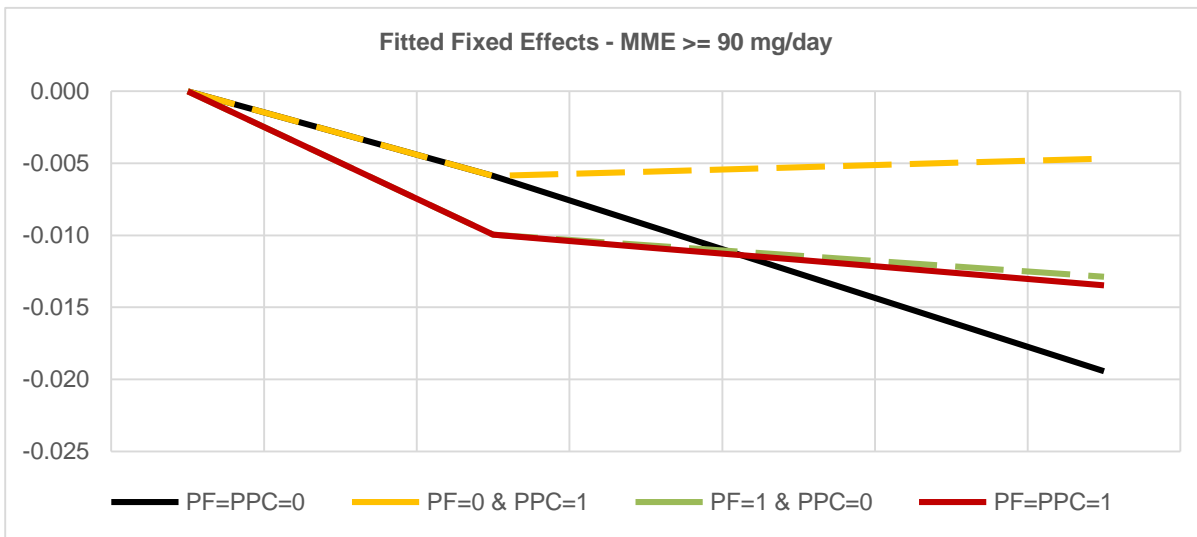

| <b>MME <math>\geq</math> 90 mg/day</b> |                               |             |
|----------------------------------------|-------------------------------|-------------|
|                                        | Estimated Fixed Effect Curves | Differences |
|                                        |                               |             |

| Study Month                         | PF=PPC=0 | PF=0 & PPC=1 | PF=1 & PPC=0 | PF=PPC=1 | PF=0 & PPC=1 minus PF=PPC=0 | PF=1 & PPC=0 minus PF=PPC=0 | PF=PPC=1 minus PF=PPC=0 |
|-------------------------------------|----------|--------------|--------------|----------|-----------------------------|-----------------------------|-------------------------|
| 0                                   | 0.000    | 0.000        | 0.000        | 0.000    | 0.000                       | 0.000                       | 0.000                   |
| 3                                   | -0.003   | -0.003       | -0.005       | -0.005   | 0.000                       | -0.002                      | -0.002                  |
| 6                                   | -0.006   | -0.006       | -0.010       | -0.010   | 0.000                       | -0.004                      | -0.004                  |
| 9                                   | -0.009   | -0.006       | -0.011       | -0.011   | 0.004                       | -0.001                      | -0.002                  |
| 12                                  | -0.013   | -0.005       | -0.011       | -0.012   | 0.007                       | 0.001                       | 0.001                   |
| 15                                  | -0.016   | -0.005       | -0.012       | -0.013   | 0.011                       | 0.004                       | 0.003                   |
| 18                                  | -0.019   | -0.005       | -0.013       | -0.013   | 0.015                       | 0.007                       | 0.006                   |
| <b>Std Dev of Estimated Values</b>  |          |              |              |          |                             |                             |                         |
| 0                                   | 0.000    | 0.000        | 0.000        | 0.000    | 0.000                       | 0.000                       | 0.000                   |
| 3                                   | 0.002    | 0.002        | 0.003        | 0.003    | 0.000                       | 0.003                       | 0.003                   |
| 6                                   | 0.005    | 0.005        | 0.005        | 0.005    | 0.000                       | 0.007                       | 0.007                   |
| 9                                   | 0.005    | 0.005        | 0.005        | 0.005    | 0.003                       | 0.007                       | 0.007                   |
| 12                                  | 0.006    | 0.006        | 0.006        | 0.006    | 0.006                       | 0.008                       | 0.008                   |
| 15                                  | 0.007    | 0.007        | 0.007        | 0.007    | 0.009                       | 0.010                       | 0.010                   |
| 18                                  | 0.009    | 0.009        | 0.009        | 0.009    | 0.012                       | 0.012                       | 0.012                   |
| <b>t-ratios of Estimated Values</b> |          |              |              |          |                             |                             |                         |
| 0                                   |          |              |              |          |                             |                             |                         |
| 3                                   | -1.25    | -1.25        | -1.95        | -1.95    |                             | -0.60                       | -0.60                   |
| 6                                   | -1.25    | -1.25        | -1.95        | -1.95    |                             | -0.60                       | -0.60                   |
| 9                                   | -1.96    | -1.18        | -2.10        | -2.14    | 1.28                        | -0.21                       | -0.23                   |
| 12                                  | -2.26    | -0.94        | -1.93        | -1.96    | 1.28                        | 0.16                        | 0.12                    |
| 15                                  | -2.30    | -0.70        | -1.67        | -1.68    | 1.28                        | 0.40                        | 0.35                    |
| 18                                  | -2.25    | -0.53        | -1.43        | -1.45    | 1.28                        | 0.54                        | 0.48                    |

| Covariance Parameter Estimates |         |          |          |                       |  |        |
|--------------------------------|---------|----------|----------|-----------------------|--|--------|
| Cov Parm                       | Subject | Estimate |          | Std Dev & Correlation |  |        |
| Intercept                      | Clinic  | 0.0002   | Clinic   | 0.0123                |  |        |
| UN(1,1)                        | PCP     | 0.0091   |          |                       |  |        |
| UN(2,1)                        | PCP     | 0.0000   | PCP      |                       |  |        |
| UN(2,2)                        | PCP     | 0.0000   |          | 0.0953                |  |        |
| UN(3,1)                        | PCP     | (0.0002) |          | 16.8%                 |  | 0.0023 |
| UN(3,2)                        | PCP     | (0.0000) |          | -73.2%                |  | -18.4% |
| UN(3,3)                        | PCP     | 0.0000   |          | 0.0029                |  |        |
| Residual                       |         | 0.0234   | Residual | 0.1530                |  |        |

| Solution for Fixed Effects |           |          |                |     |         |         |
|----------------------------|-----------|----------|----------------|-----|---------|---------|
| Effect                     | system    | Estimate | Standard Error | DF  | t Value | Pr >  t |
| system                     | Bellin    | 0.0369   | 0.0118         | 802 | 3.14    | 0.0018  |
| system                     | UW Health | 0.1269   | 0.0094         | 802 | 13.49   | <.0001  |
| clinic_size                |           | 0.0000   | 0.0000         | 802 | -Inf    | <.0001  |
| t7                         |           | -0.0010  | 0.0008         | 256 | -1.26   | 0.211   |
| PF_t7                      |           | -0.0007  | 0.0011         | 802 | -0.59   | 0.553   |
| t13                        |           | -0.0002  | 0.0011         | 204 | -0.13   | 0.897   |
| PF_t13                     |           | 0.0016   | 0.0017         | 802 | 0.93    | 0.350   |
| PPC_t13                    |           | 0.0012   | 0.0010         | 802 | 1.28    | 0.200   |
| PFandPPC_t13               |           | -0.0013  | 0.0014         | 802 | -0.92   | 0.358   |

| Estimates        |          |                |     |         |         |
|------------------|----------|----------------|-----|---------|---------|
| Label            | Estimate | Standard Error | DF  | t Value | Pr >  t |
| NOINT Chg        | -0.0194  | 0.0086         | 802 | -2.25   | 0.025   |
| PF Only Chg      | -0.0128  | 0.0091         | 802 | -1.40   | 0.161   |
| PPC Only Chg     | -0.0047  | 0.0089         | 802 | -0.53   | 0.599   |
| PF & PPC Chg     | -0.0135  | 0.0094         | 802 | -1.43   | 0.154   |
| PF Only vs NOINT | 0.0066   | 0.0123         | 802 | 0.54    | 0.590   |

|                                 |         |        |     |       |       |
|---------------------------------|---------|--------|-----|-------|-------|
| <b>PPC Only vs NOINT</b>        | 0.0148  | 0.0115 | 802 | 1.28  | 0.200 |
| <b>PF Only vs PPC Only 1</b>    | -0.0082 | 0.0124 | 802 | -0.66 | 0.512 |
| <b>PF Only vs PPC Only 2</b>    | -0.0041 | 0.0122 | 802 | -0.34 | 0.737 |
| <b>PF &amp; PPC Interaction</b> | -0.0154 | 0.0168 | 802 | -0.92 | 0.358 |
| <b>PF &amp; PPC vs NOINT</b>    | 0.0060  | 0.0125 | 802 | 0.48  | 0.634 |

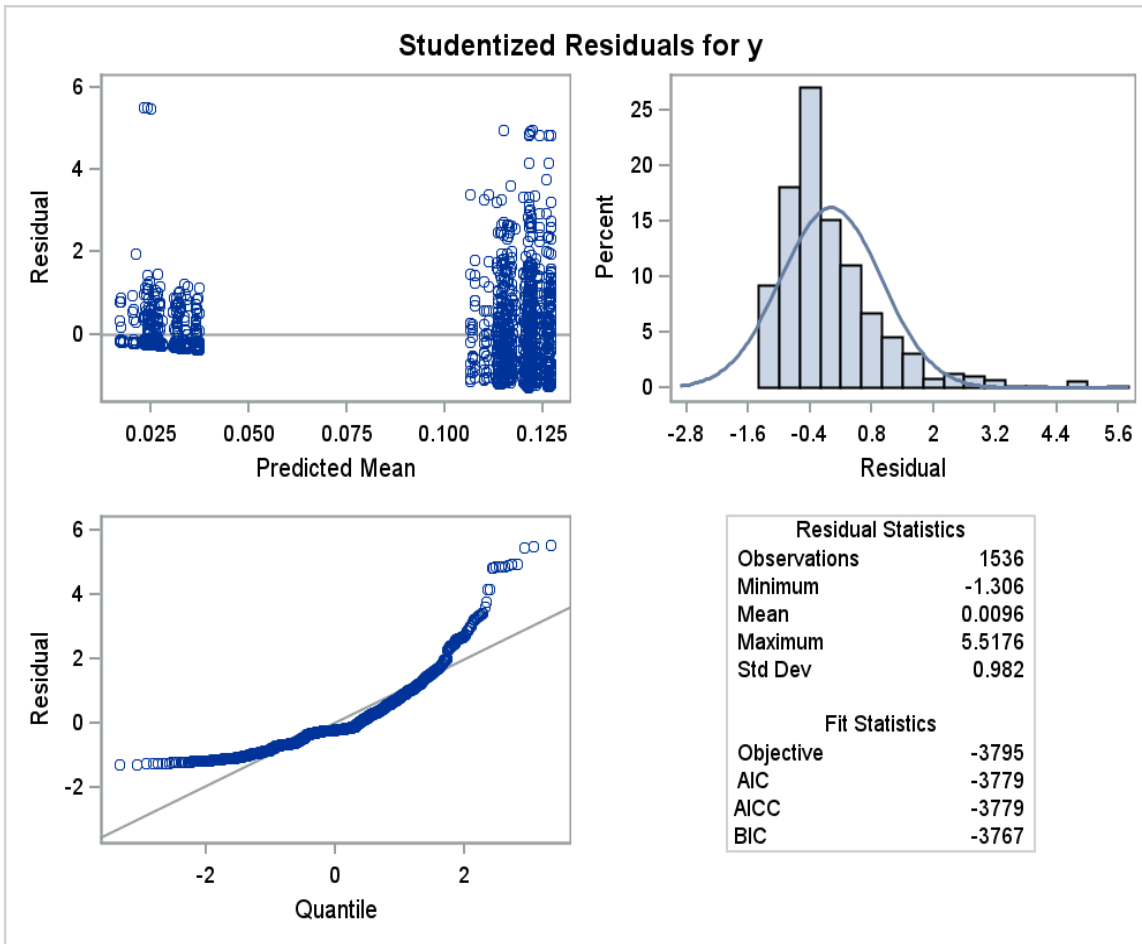

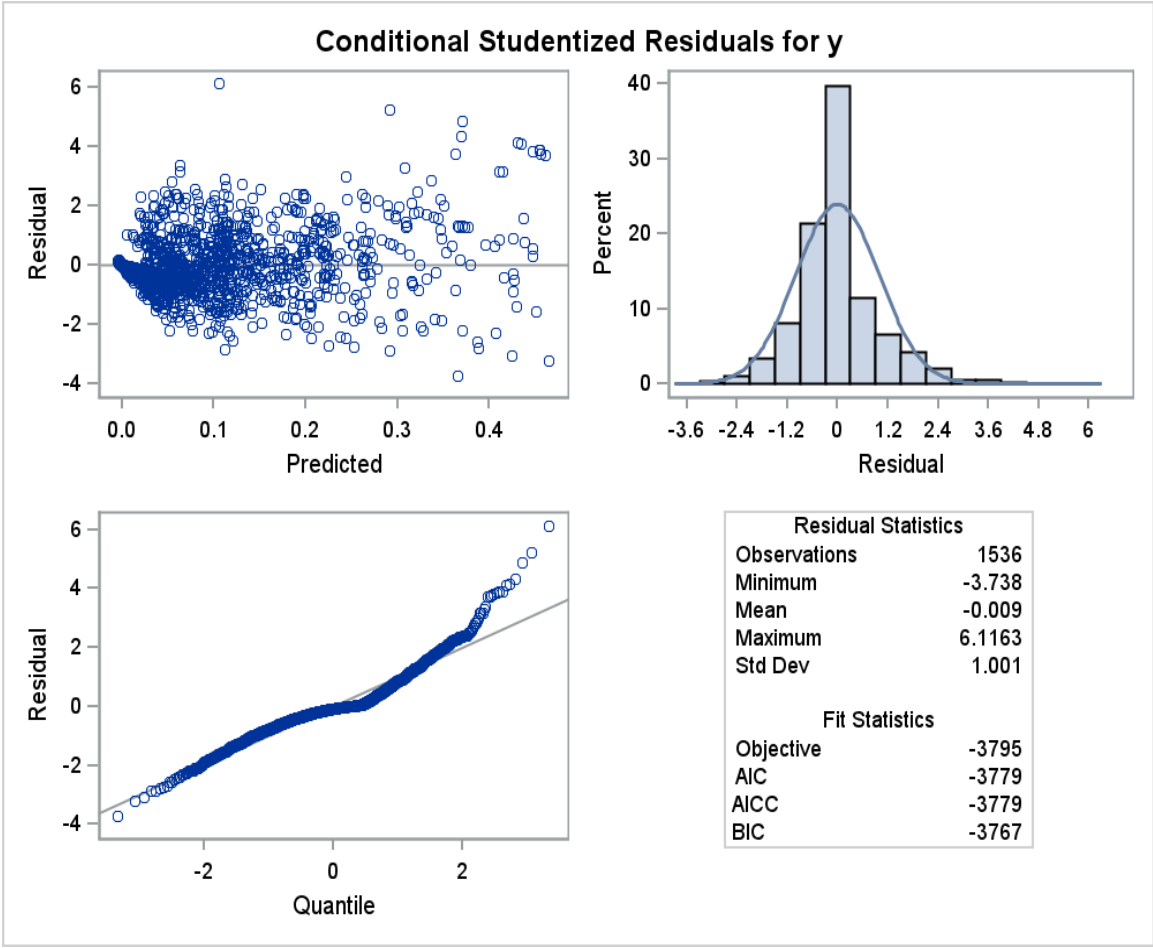

Appendix A3 – Percent of Opioid Patients with Benzo's in Last 3 Months

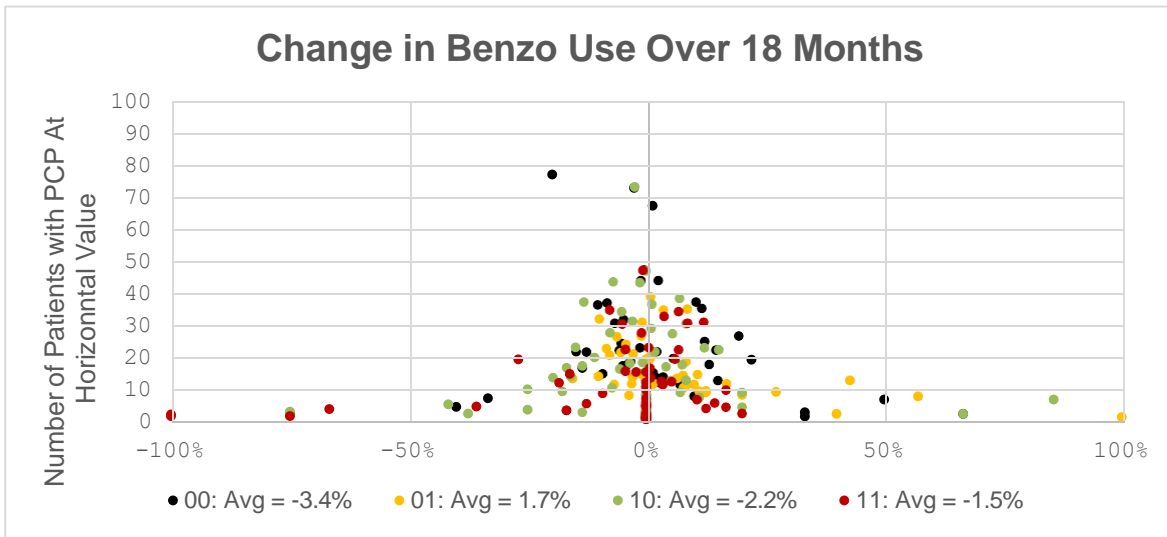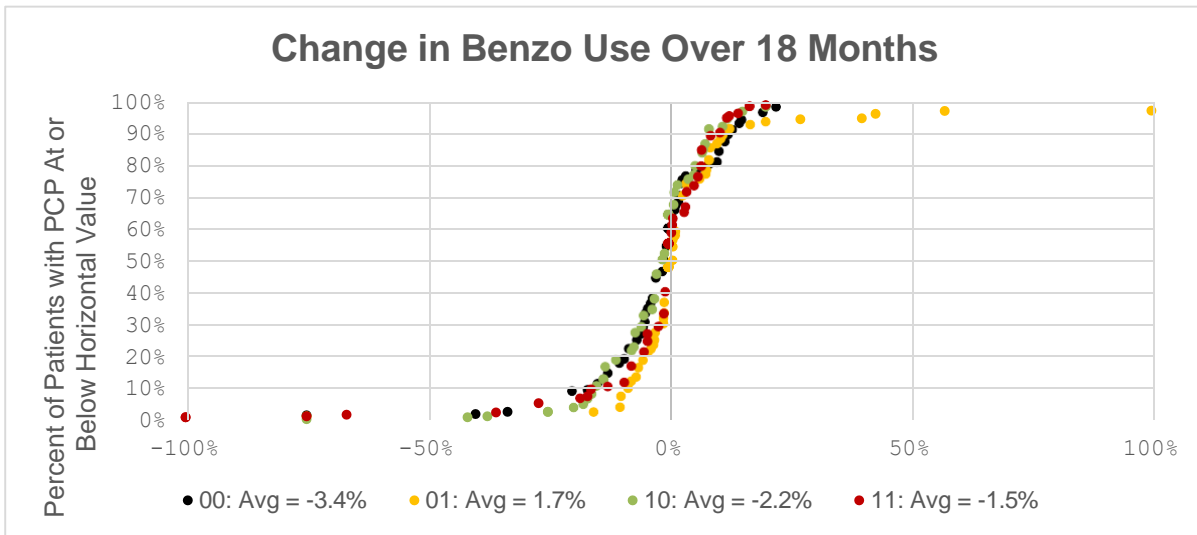



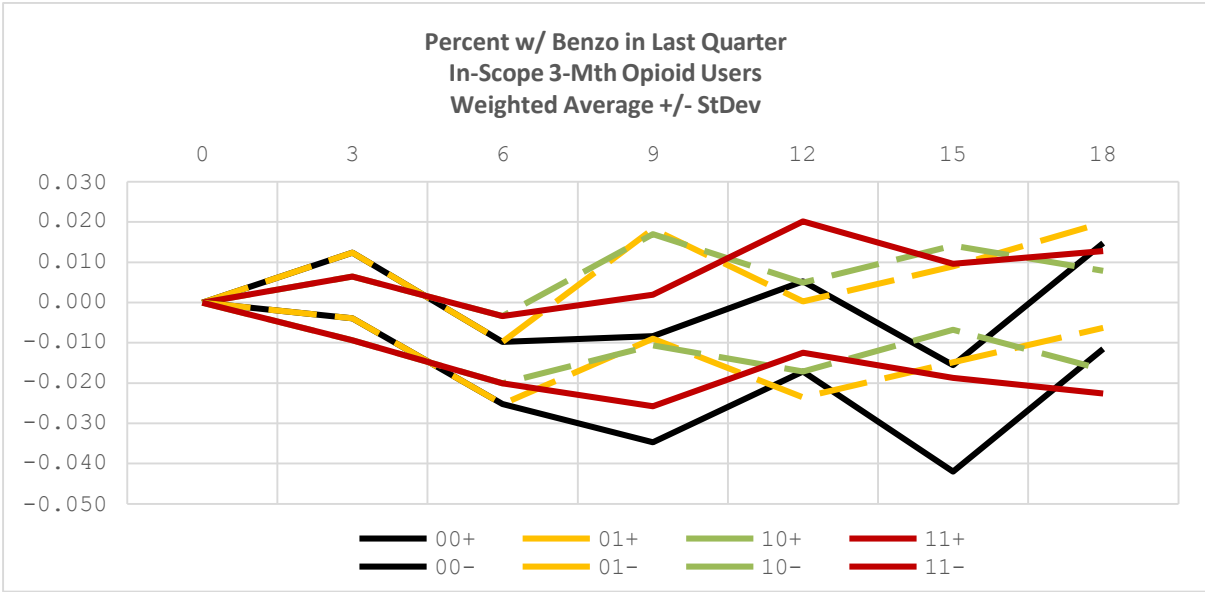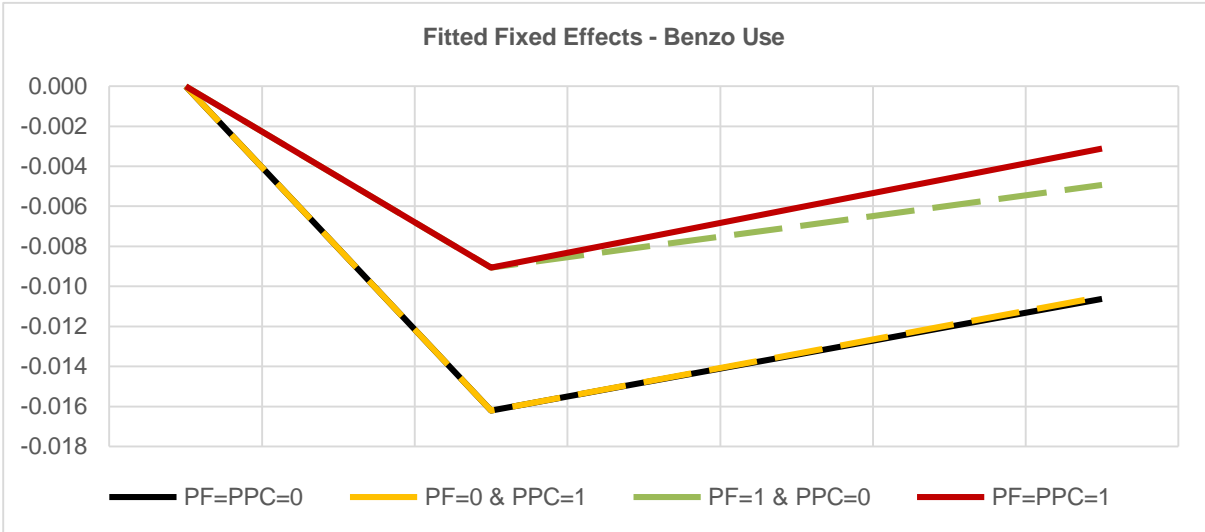

| <b>Benzo Use</b>              |             |  |
|-------------------------------|-------------|--|
| Estimated Fixed Effect Curves | Differences |  |
|                               |             |  |

| Study Month                         | PF=PPC=0 | PF=0 & PPC=1 | PF=1 & PPC=0 | PF=PPC=1 | PF=0 & PPC=1 minus PF=PPC=0 | PF=1 & PPC=0 minus PF=PPC=0 | PF=PPC=1 minus PF=PPC=0 |
|-------------------------------------|----------|--------------|--------------|----------|-----------------------------|-----------------------------|-------------------------|
| 0                                   | 0.000    | 0.000        | 0.000        | 0.000    | 0.000                       | 0.000                       | 0.000                   |
| 3                                   | -0.008   | -0.008       | -0.005       | -0.005   | 0.000                       | 0.004                       | 0.004                   |
| 6                                   | -0.016   | -0.016       | -0.009       | -0.009   | 0.000                       | 0.007                       | 0.007                   |
| 9                                   | -0.015   | -0.015       | -0.008       | -0.008   | 0.000                       | 0.007                       | 0.007                   |
| 12                                  | -0.013   | -0.013       | -0.007       | -0.006   | 0.000                       | 0.006                       | 0.007                   |
| 15                                  | -0.012   | -0.012       | -0.006       | -0.005   | 0.000                       | 0.006                       | 0.007                   |
| 18                                  | -0.011   | -0.011       | -0.005       | -0.003   | 0.000                       | 0.006                       | 0.008                   |
| <b>Std Dev of Estimated Values</b>  |          |              |              |          |                             |                             |                         |
| 0                                   | 0.000    | 0.000        | 0.000        | 0.000    | 0.000                       | 0.000                       | 0.000                   |
| 3                                   | 0.004    | 0.004        | 0.004        | 0.004    | 0.000                       | 0.005                       | 0.005                   |
| 6                                   | 0.007    | 0.007        | 0.008        | 0.008    | 0.000                       | 0.010                       | 0.010                   |
| 9                                   | 0.007    | 0.007        | 0.007        | 0.007    | 0.004                       | 0.009                       | 0.009                   |
| 12                                  | 0.007    | 0.007        | 0.008        | 0.008    | 0.007                       | 0.010                       | 0.010                   |
| 15                                  | 0.008    | 0.009        | 0.009        | 0.010    | 0.011                       | 0.012                       | 0.012                   |
| 18                                  | 0.010    | 0.011        | 0.011        | 0.012    | 0.014                       | 0.015                       | 0.015                   |
| <b>t-ratios of Estimated Values</b> |          |              |              |          |                             |                             |                         |
| 0                                   |          |              |              |          |                             |                             |                         |
| 3                                   | -2.29    | -2.29        | -1.18        | -1.18    |                             | 0.72                        | 0.72                    |
| 6                                   | -2.29    | -2.29        | -1.18        | -1.18    |                             | 0.72                        | 0.72                    |
| 9                                   | -2.23    | -2.22        | -1.12        | -1.05    | 0.01                        | 0.74                        | 0.78                    |
| 12                                  | -1.88    | -1.82        | -0.91        | -0.77    | 0.01                        | 0.64                        | 0.72                    |
| 15                                  | -1.42    | -1.34        | -0.66        | -0.48    | 0.01                        | 0.51                        | 0.60                    |
| 18                                  | -1.04    | -0.96        | -0.45        | -0.27    | 0.01                        | 0.39                        | 0.50                    |

| Covariance Parameter Estimates |         |          |                       |        |         |
|--------------------------------|---------|----------|-----------------------|--------|---------|
| Cov Parm                       | Subject | Estimate | Std Dev & Correlation |        |         |
| Intercept                      | Clinic  | 0.0003   | Clinic                | 0.0182 |         |
| UN(1,1)                        | PCP     | 0.0065   |                       |        |         |
| UN(2,1)                        | PCP     | (0.0001) |                       |        |         |
| UN(2,2)                        | PCP     | 0.0000   | PCP                   | 0.0806 |         |
| UN(3,1)                        | PCP     | 0.0001   |                       | -31.0% | 0.0040  |
| UN(3,2)                        | PCP     | (0.0000) |                       | 29.3%  | -100.0% |
| UN(3,3)                        | PCP     | 0.0000   |                       |        | 0.0050  |
| Residual                       |         | 0.0569   | Residual              | 0.2386 |         |

| Solution for Fixed Effects |           |          |                |     |         |         |
|----------------------------|-----------|----------|----------------|-----|---------|---------|
| Effect                     | system    | Estimate | Standard Error | DF  | t Value | Pr >  t |
| system                     | Bellin    | 0.1156   | 0.0119         | 805 | 9.69    | <.0001  |
| system                     | UW Health | 0.1290   | 0.0101         | 805 | 12.84   | <.0001  |
| clinic_size                |           | 0.0000   | 0.0000         | 805 | Infty   | <.0001  |
| t7                         |           | -0.0027  | 0.0012         | 256 | -2.29   | 0.023   |
| PF_t7                      |           | 0.0012   | 0.0016         | 805 | 0.72    | 0.470   |
| t13                        |           | 0.0032   | 0.0017         | 204 | 1.88    | 0.061   |
| PF_t13                     |           | -0.0013  | 0.0024         | 805 | -0.54   | 0.588   |
| PPC_t13                    |           | 0.0000   | 0.0012         | 805 | 0.01    | 0.994   |
| PFandPPC_t13               |           | 0.0001   | 0.0017         | 805 | 0.08    | 0.933   |

| Estimates         |          |                |     |         |         |
|-------------------|----------|----------------|-----|---------|---------|
| Label             | Estimate | Standard Error | DF  | t Value | Pr >  t |
| NOINT Chg         | -0.0107  | 0.0102         | 805 | -1.05   | 0.294   |
| PF Only Chg       | -0.0050  | 0.0109         | 805 | -0.45   | 0.651   |
| PPC Only Chg      | -0.0106  | 0.0108         | 805 | -0.98   | 0.330   |
| PF & PPC Chg      | -0.0031  | 0.0116         | 805 | -0.27   | 0.787   |
| PF Only vs NOINT  | 0.0057   | 0.0147         | 805 | 0.39    | 0.696   |
| PPC Only vs NOINT | 0.0001   | 0.0140         | 805 | 0.01    | 0.994   |

|                       |         |        |     |       |       |
|-----------------------|---------|--------|-----|-------|-------|
| PF Only vs PPC Only 1 | 0.0056  | 0.0151 | 805 | 0.37  | 0.710 |
| PF Only vs PPC Only 2 | -0.0015 | 0.0156 | 805 | -0.10 | 0.923 |
| PF & PPC Interaction  | 0.0017  | 0.0205 | 805 | 0.08  | 0.933 |
| PF & PPC vs NOINT     | 0.0075  | 0.0151 | 805 | 0.50  | 0.618 |

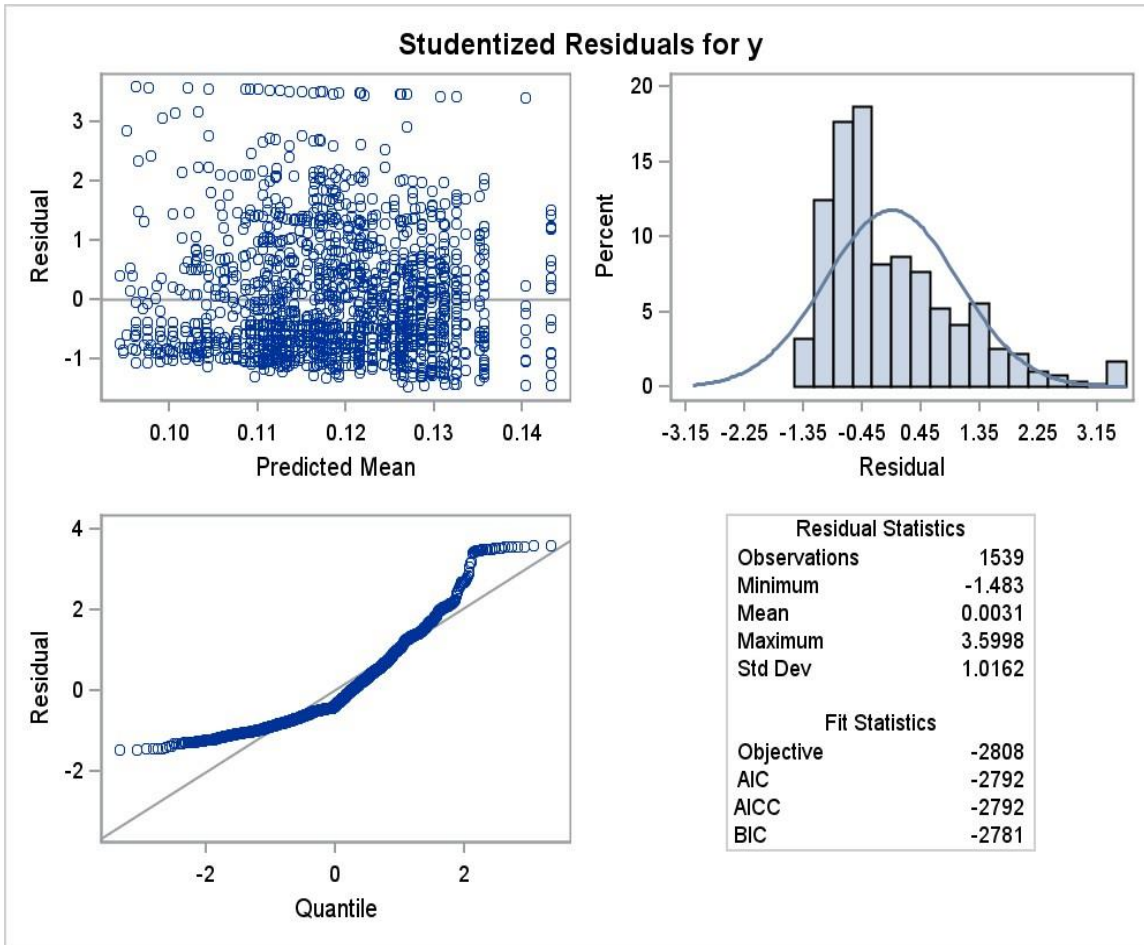

### Conditional Studentized Residuals for y

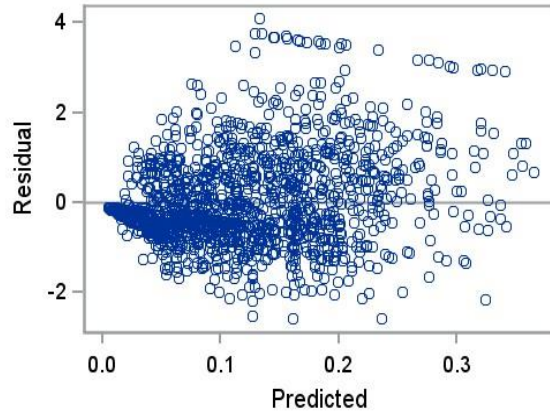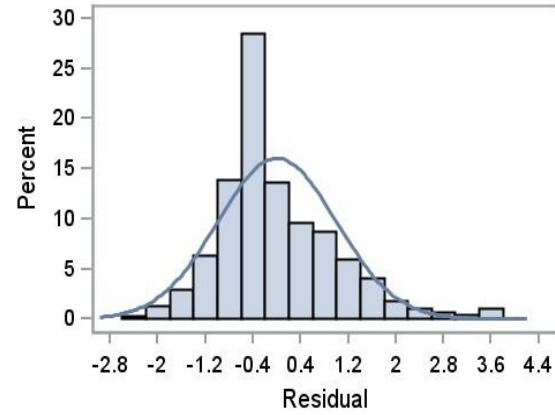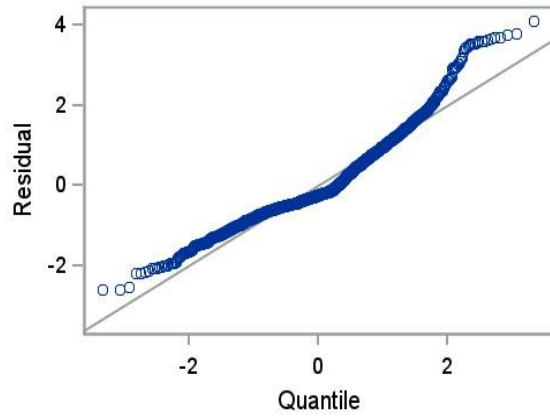

| Residual Statistics |        |
|---------------------|--------|
| Observations        | 1539   |
| Minimum             | -2.598 |
| Mean                | 159E-8 |
| Maximum             | 4.0978 |
| Std Dev             | 0.994  |
| Fit Statistics      |        |
| Objective           | -2808  |
| AIC                 | -2792  |
| AICC                | -2792  |
| BIC                 | -2781  |

Appendix A4 – Percent of Opioid Patients with Urine Drug Screen in Last 12 Months

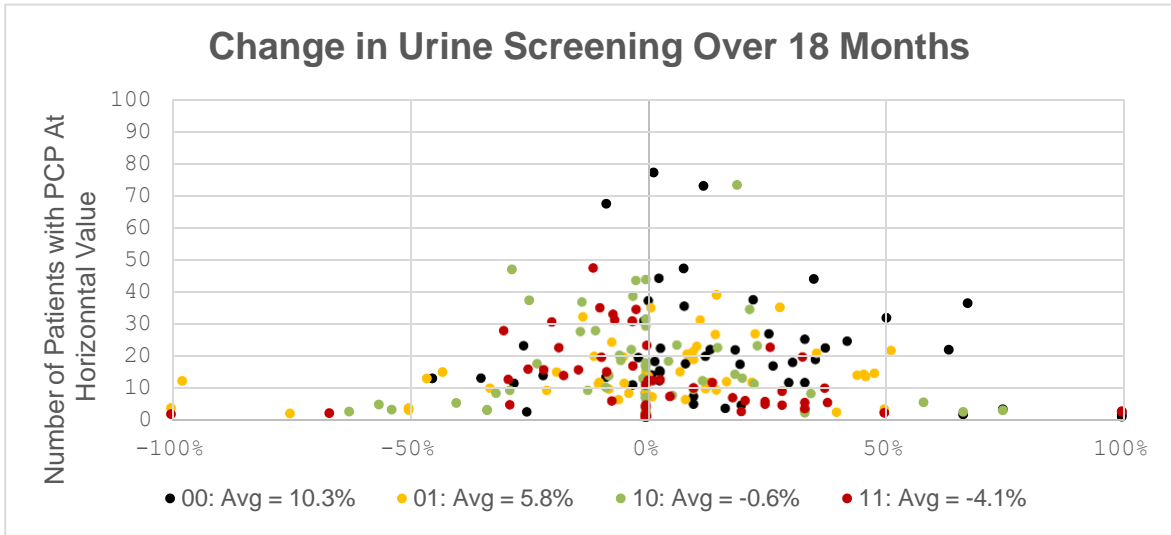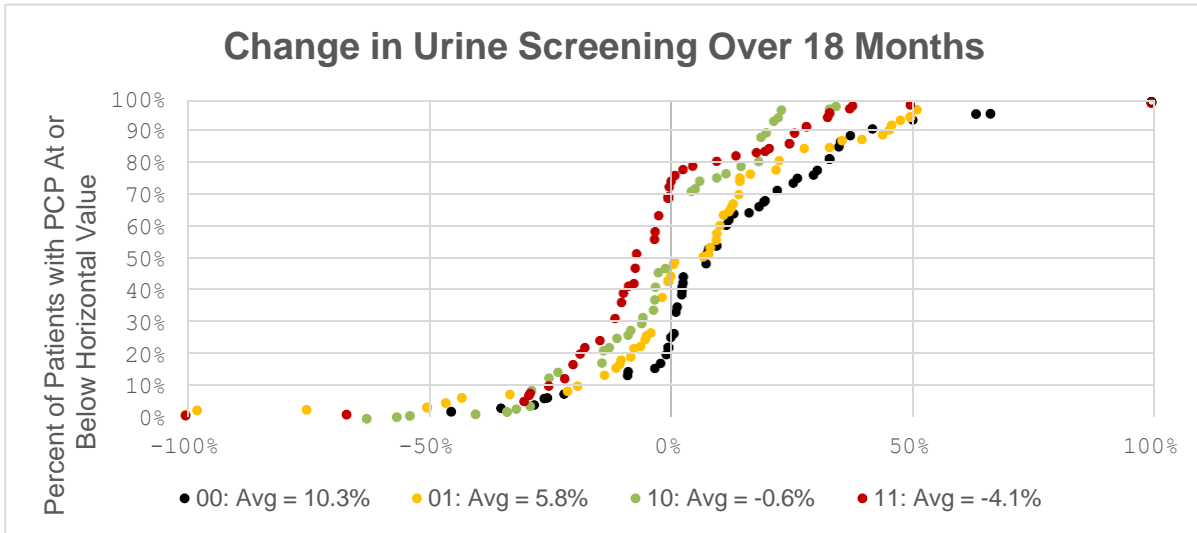

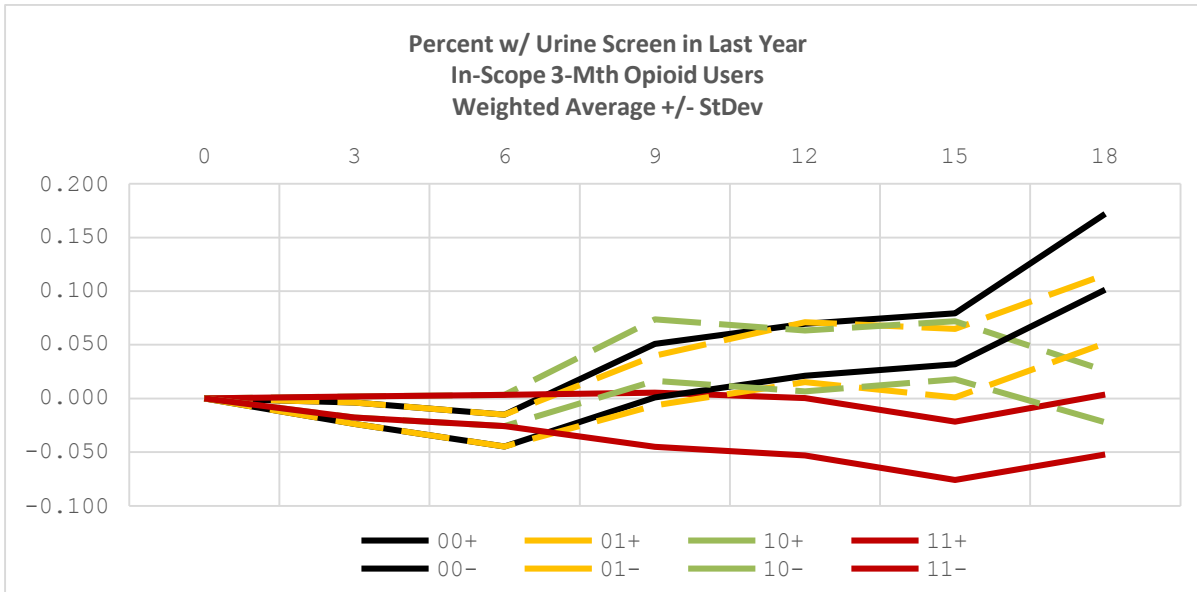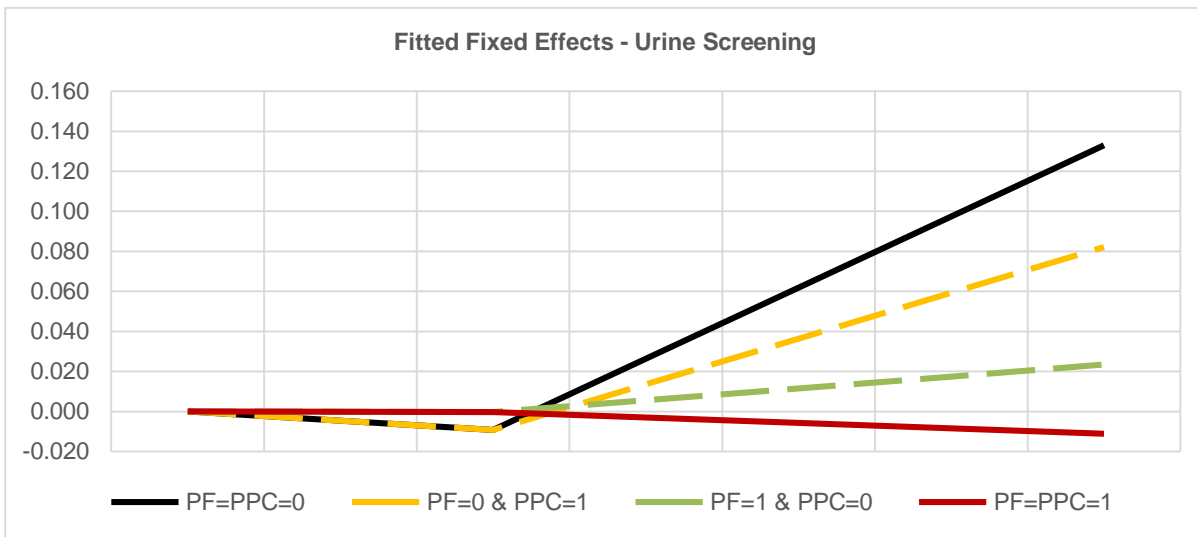

| <b>Urine Screening</b> |                               |             |
|------------------------|-------------------------------|-------------|
|                        | Estimated Fixed Effect Curves | Differences |

| Study Month                         | PF=PPC=0 | PF=0 & PPC=1 | PF=1 & PPC=0 | PF=PPC=1 | PF=0 & PPC=1 minus PF=PPC=0 | PF=1 & PPC=0 minus PF=PPC=0 | PF=PPC=1 minus PF=PPC=0 |
|-------------------------------------|----------|--------------|--------------|----------|-----------------------------|-----------------------------|-------------------------|
| 0                                   | 0.000    | 0.000        | 0.000        | 0.000    | 0.000                       | 0.000                       | 0.000                   |
| 3                                   | -0.005   | -0.005       | 0.000        | 0.000    | 0.000                       | 0.004                       | 0.004                   |
| 6                                   | -0.009   | -0.009       | 0.000        | 0.000    | 0.000                       | 0.009                       | 0.009                   |
| 9                                   | 0.026    | 0.014        | 0.006        | -0.003   | -0.013                      | -0.021                      | -0.029                  |
| 12                                  | 0.062    | 0.036        | 0.012        | -0.006   | -0.025                      | -0.050                      | -0.068                  |
| 15                                  | 0.097    | 0.059        | 0.017        | -0.008   | -0.038                      | -0.080                      | -0.106                  |
| 18                                  | 0.133    | 0.082        | 0.023        | -0.011   | -0.051                      | -0.110                      | -0.144                  |
| <b>Std Dev of Estimated Values</b>  |          |              |              |          |                             |                             |                         |
| 0                                   | 0.000    | 0.000        | 0.000        | 0.000    | 0.000                       | 0.000                       | 0.000                   |
| 3                                   | 0.008    | 0.008        | 0.009        | 0.009    | 0.000                       | 0.012                       | 0.012                   |
| 6                                   | 0.016    | 0.016        | 0.017        | 0.017    | 0.000                       | 0.023                       | 0.023                   |
| 9                                   | 0.016    | 0.016        | 0.016        | 0.016    | 0.009                       | 0.020                       | 0.020                   |
| 12                                  | 0.019    | 0.019        | 0.020        | 0.020    | 0.018                       | 0.020                       | 0.019                   |
| 15                                  | 0.023    | 0.023        | 0.027        | 0.027    | 0.027                       | 0.022                       | 0.021                   |
| 18                                  | 0.029    | 0.029        | 0.036        | 0.035    | 0.037                       | 0.026                       | 0.025                   |
| <b>t-ratios of Estimated Values</b> |          |              |              |          |                             |                             |                         |
| 0                                   |          |              |              |          |                             |                             |                         |
| 3                                   | -0.57    | -0.57        | -0.02        | -0.02    |                             | 0.38                        | 0.38                    |
| 6                                   | -0.57    | -0.57        | -0.02        | -0.02    |                             | 0.38                        | 0.38                    |
| 9                                   | 1.61     | 0.84         | 0.35         | -0.19    | -1.39                       | -1.02                       | -1.45                   |
| 12                                  | 3.25     | 1.93         | 0.57         | -0.29    | -1.39                       | -2.53                       | -3.47                   |
| 15                                  | 4.15     | 2.54         | 0.64         | -0.32    | -1.39                       | -3.63                       | -4.98                   |
| 18                                  | 4.61     | 2.86         | 0.66         | -0.32    | -1.39                       | -4.19                       | -5.75                   |



| Covariance Parameter Estimates |         |          |                       |  |  |
|--------------------------------|---------|----------|-----------------------|--|--|
| Cov Parm                       | Subject | Estimate | Std Dev & Correlation |  |  |
| Intercept                      | Clinic  | 0.0157   | Clinic 0.1253         |  |  |
| UN(1,1)                        | PCP     | 0.0320   |                       |  |  |
| UN(2,1)                        | PCP     | (0.0018) |                       |  |  |
| UN(2,2)                        | PCP     | 0.0004   | PCP 0.1789            |  |  |
| UN(3,1)                        | PCP     | 0.0013   | -47.8% 0.0208         |  |  |
| UN(3,2)                        | PCP     | (0.0005) | 28.2% -86.0% 0.0257   |  |  |
| UN(3,3)                        | PCP     | 0.0007   |                       |  |  |
| Residual                       |         | 0.1129   | Residual 0.3360       |  |  |

| Solution for Fixed Effects |           |          |                |     |         |         |
|----------------------------|-----------|----------|----------------|-----|---------|---------|
| Effect                     | system    | Estimate | Standard Error | DF  | t Value | Pr >  t |
| system                     | Bellin    | 0.2485   | 0.0392         | 805 | 6.35    | <.0001  |
| system                     | UW Health | 0.3536   | 0.0399         | 805 | 8.86    | <.0001  |
| clinic_size                |           | 0.0000   | 0.0000         | 805 | -2.05   | 0.040   |
| t7                         |           | -0.0015  | 0.0027         | 256 | -0.57   | 0.571   |
| PF_t7                      |           | 0.0015   | 0.0039         | 805 | 0.38    | 0.703   |
| t13                        |           | 0.0134   | 0.0038         | 204 | 3.49    | 0.001   |
| PF_t13                     |           | -0.0114  | 0.0055         | 805 | -2.05   | 0.041   |
| PPC_t13                    |           | -0.0042  | 0.0030         | 805 | -1.39   | 0.165   |
| PFandPPC_t13               |           | 0.0014   | 0.0044         | 805 | 0.31    | 0.757   |

| Estimates         |          |                |     |         |         |
|-------------------|----------|----------------|-----|---------|---------|
| Label             | Estimate | Standard Error | DF  | t Value | Pr >  t |
| NOINT Chg         | 0.1330   | 0.0281         | 805 | 4.73    | <.0001  |
| PF Only Chg       | 0.0234   | 0.0292         | 805 | 0.80    | 0.423   |
| PPC Only Chg      | 0.0821   | 0.0280         | 805 | 2.93    | 0.003   |
| PF & PPC Chg      | -0.0111  | 0.0293         | 805 | -0.38   | 0.705   |
| PF Only vs NOINT  | -0.1095  | 0.0401         | 805 | -2.73   | 0.006   |
| PPC Only vs NOINT | -0.0509  | 0.0366         | 805 | -1.39   | 0.165   |

|                                 |         |        |     |       |       |
|---------------------------------|---------|--------|-----|-------|-------|
| <b>PF Only vs PPC Only 1</b>    | -0.0586 | 0.0400 | 805 | -1.47 | 0.143 |
| <b>PF Only vs PPC Only 2</b>    | -0.0675 | 0.0384 | 805 | -1.76 | 0.079 |
| <b>PF &amp; PPC Interaction</b> | 0.0164  | 0.0529 | 805 | 0.31  | 0.757 |
| <b>PF &amp; PPC vs NOINT</b>    | -0.1440 | 0.0402 | 805 | -3.59 | 0.000 |

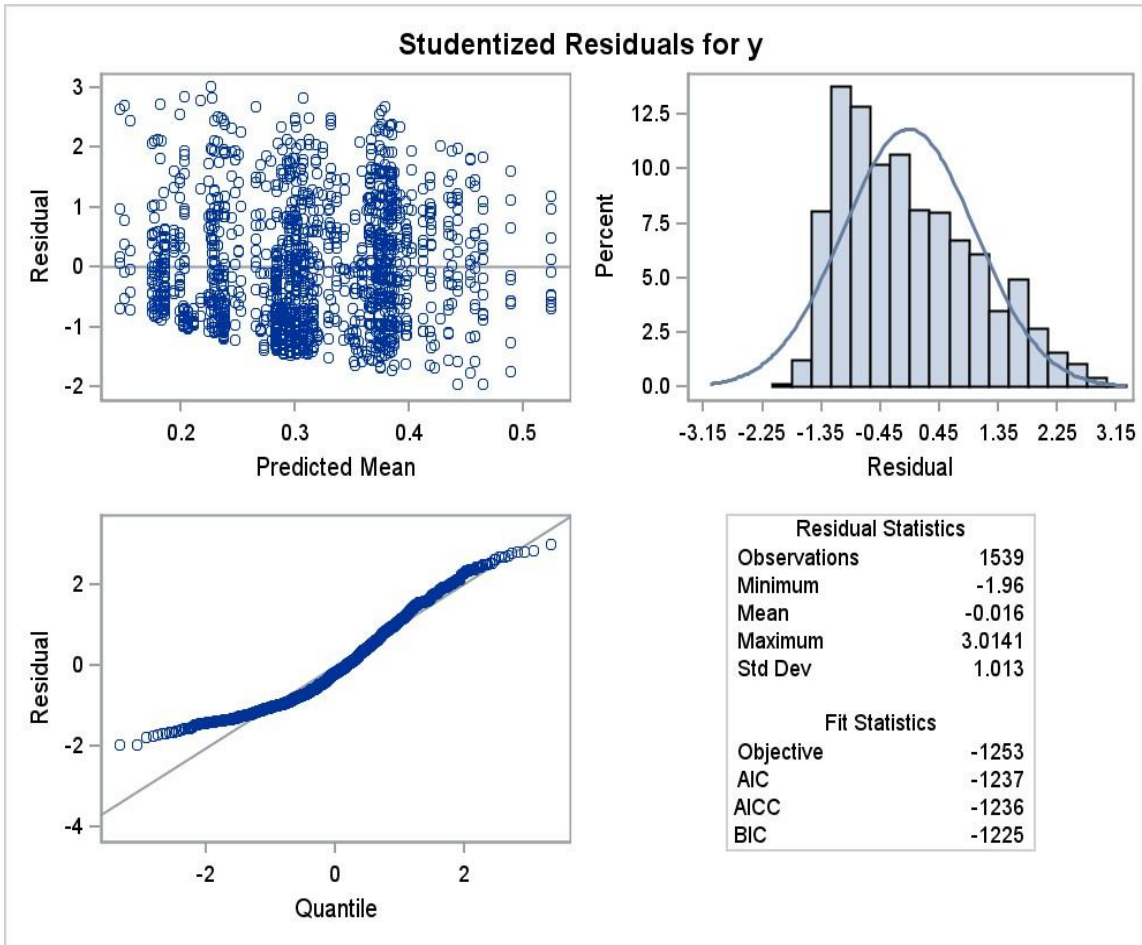

### Conditional Studentized Residuals for y

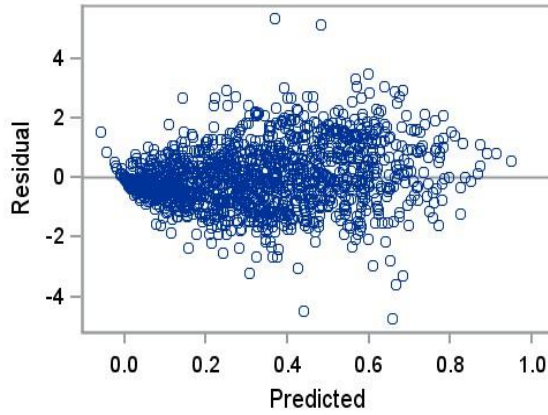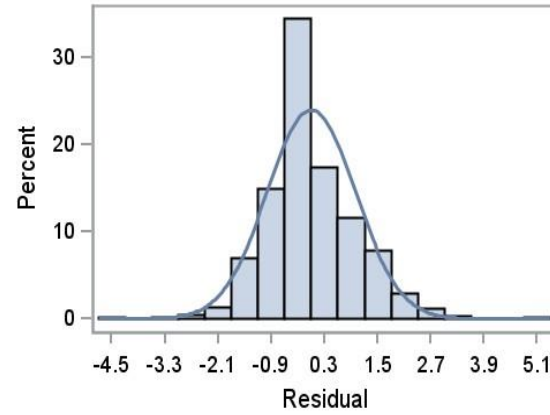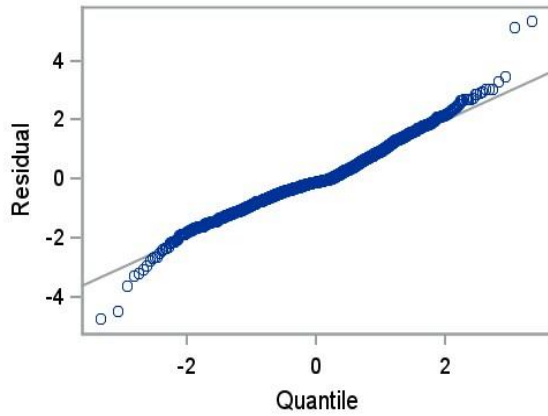

| Residual Statistics |        |
|---------------------|--------|
| Observations        | 1539   |
| Minimum             | -4.746 |
| Mean                | -66E-6 |
| Maximum             | 5.3511 |
| Std Dev             | 0.998  |

  

| Fit Statistics |       |
|----------------|-------|
| Objective      | -1253 |
| AIC            | -1237 |
| AICC           | -1236 |
| BIC            | -1225 |

Appendix A5 – Percent of Opioid Patients with Treatment Agreement in Last 12 Months

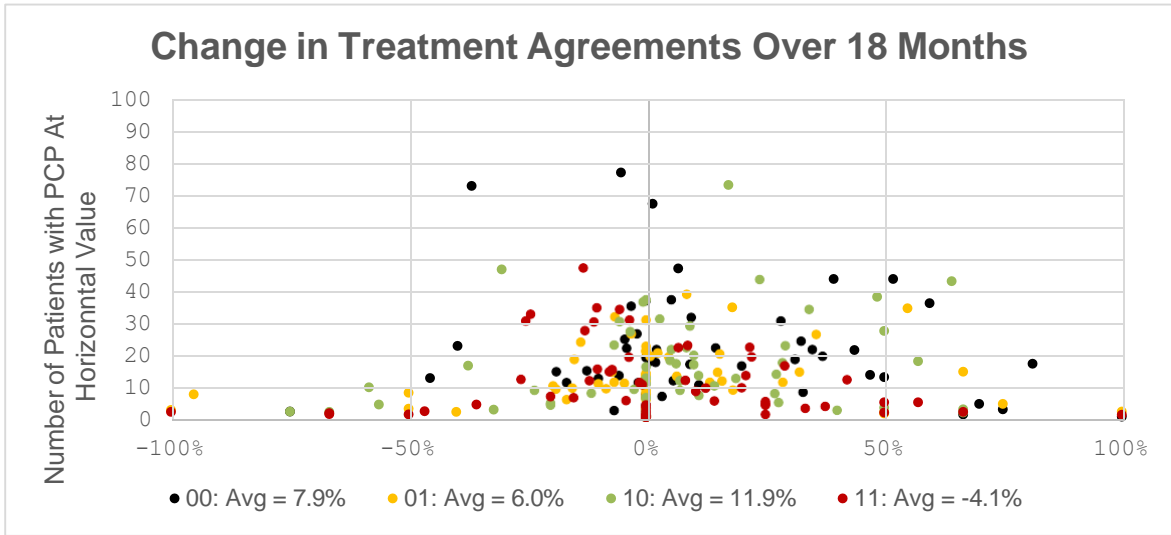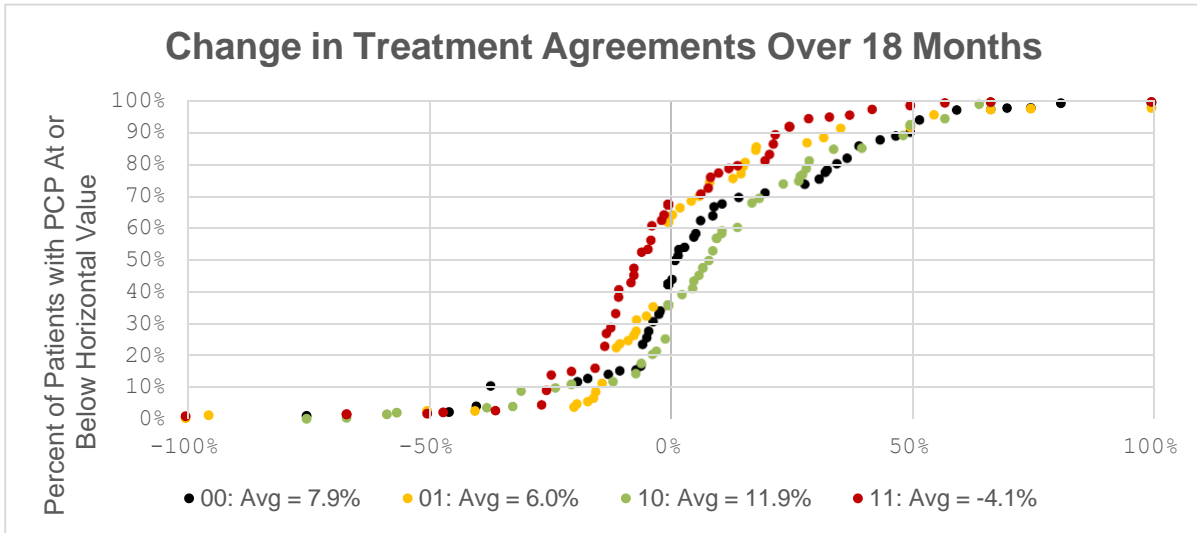

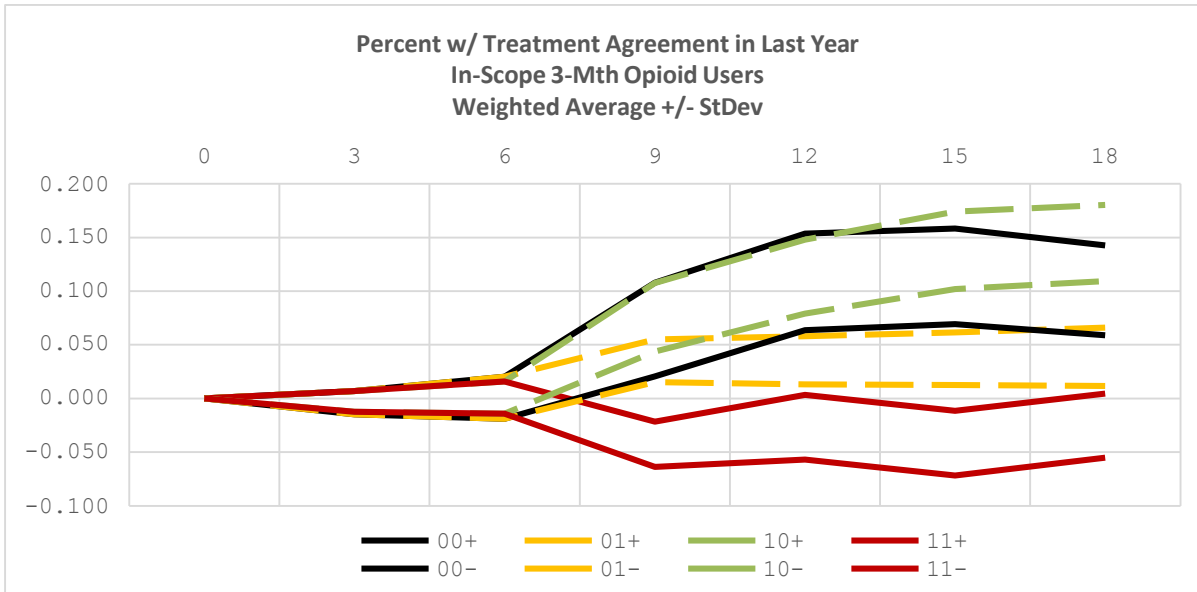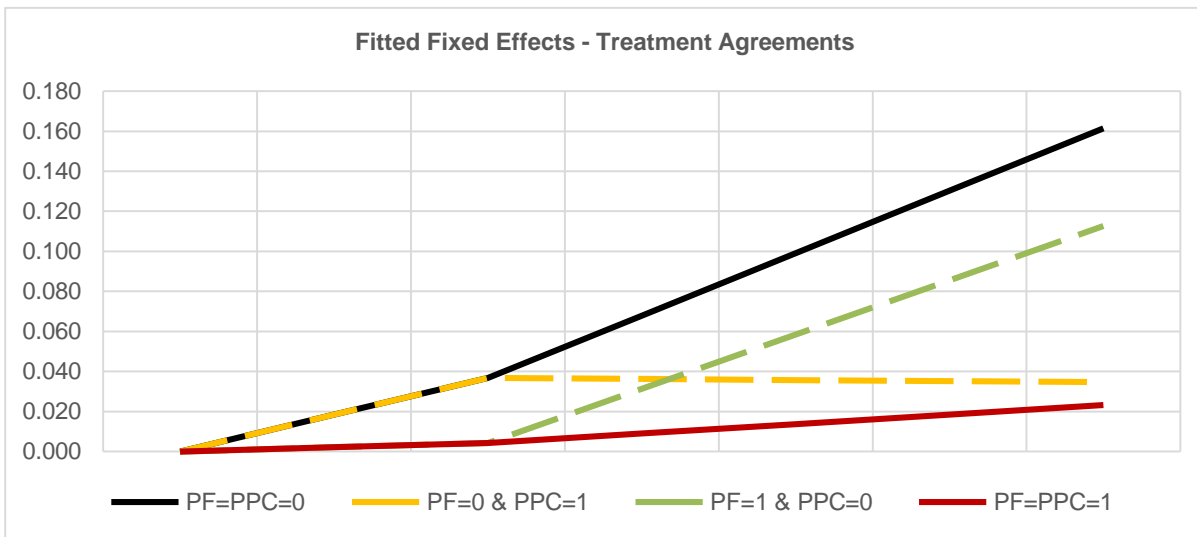

| <b>Treatment Agreements</b> |                                      |                    |
|-----------------------------|--------------------------------------|--------------------|
|                             | <b>Estimated Fixed Effect Curves</b> | <b>Differences</b> |

| Study Month                         | PF=PPC=0 | PF=0 & PPC=1 | PF=1 & PPC=0 | PF=PPC=1 | PF=0 & PPC=1 minus PF=PPC=0 | PF=1 & PPC=0 minus PF=PPC=0 | PF=PPC=1 minus PF=PPC=0 |
|-------------------------------------|----------|--------------|--------------|----------|-----------------------------|-----------------------------|-------------------------|
| 0                                   | 0.000    | 0.000        | 0.000        | 0.000    | 0.000                       | 0.000                       | 0.000                   |
| 3                                   | 0.018    | 0.018        | 0.002        | 0.002    | 0.000                       | -0.016                      | -0.016                  |
| 6                                   | 0.037    | 0.037        | 0.004        | 0.004    | 0.000                       | -0.033                      | -0.033                  |
| 9                                   | 0.068    | 0.036        | 0.031        | 0.009    | -0.032                      | -0.037                      | -0.059                  |
| 12                                  | 0.099    | 0.036        | 0.058        | 0.014    | -0.063                      | -0.041                      | -0.085                  |
| 15                                  | 0.130    | 0.035        | 0.086        | 0.018    | -0.095                      | -0.045                      | -0.112                  |
| 18                                  | 0.161    | 0.035        | 0.113        | 0.023    | -0.127                      | -0.049                      | -0.138                  |
| <b>Std Dev of Estimated Values</b>  |          |              |              |          |                             |                             |                         |
| 0                                   | 0.000    | 0.000        | 0.000        | 0.000    | 0.000                       | 0.000                       | 0.000                   |
| 3                                   | 0.009    | 0.009        | 0.010        | 0.010    | 0.000                       | 0.013                       | 0.013                   |
| 6                                   | 0.019    | 0.019        | 0.020        | 0.020    | 0.000                       | 0.027                       | 0.027                   |
| 9                                   | 0.021    | 0.020        | 0.023        | 0.023    | 0.009                       | 0.029                       | 0.029                   |
| 12                                  | 0.025    | 0.024        | 0.029        | 0.028    | 0.019                       | 0.035                       | 0.035                   |
| 15                                  | 0.030    | 0.030        | 0.035        | 0.035    | 0.028                       | 0.044                       | 0.044                   |
| 18                                  | 0.037    | 0.037        | 0.042        | 0.041    | 0.037                       | 0.054                       | 0.053                   |
| <b>t-ratios of Estimated Values</b> |          |              |              |          |                             |                             |                         |
| 0                                   |          |              |              |          |                             |                             |                         |
| 3                                   | 1.94     | 1.94         | 0.21         | 0.21     |                             | -1.21                       | -1.21                   |
| 6                                   | 1.94     | 1.94         | 0.21         | 0.21     |                             | -1.21                       | -1.21                   |
| 9                                   | 3.30     | 1.78         | 1.34         | 0.39     | -3.40                       | -1.25                       | -2.02                   |
| 12                                  | 4.01     | 1.46         | 2.04         | 0.48     | -3.40                       | -1.15                       | -2.42                   |
| 15                                  | 4.28     | 1.17         | 2.45         | 0.53     | -3.40                       | -1.02                       | -2.55                   |
| 18                                  | 4.37     | 0.94         | 2.70         | 0.56     | -3.40                       | -0.91                       | -2.59                   |

| Covariance Parameter Estimates |         |          |          |                       |  |        |        |
|--------------------------------|---------|----------|----------|-----------------------|--|--------|--------|
| Cov Parm                       | Subject | Estimate |          | Std Dev & Correlation |  |        |        |
| Intercept                      | Clinic  | 0.0072   | Clinic   | 0.0849                |  |        |        |
| UN(1,1)                        | PCP     | 0.0176   |          |                       |  |        |        |
| UN(2,1)                        | PCP     | (0.0022) | PCP      |                       |  |        |        |
| UN(2,2)                        | PCP     | 0.0008   |          | 0.1328                |  |        |        |
| UN(3,1)                        | PCP     | 0.0016   |          | -57.5%                |  | 0.0288 |        |
| UN(3,2)                        | PCP     | (0.0008) |          | 38.3%                 |  | -91.0% | 0.0320 |
| UN(3,3)                        | PCP     | 0.0010   |          |                       |  |        |        |
| Residual                       |         | 0.1026   | Residual | 0.3203                |  |        |        |

| Solution for Fixed Effects |           |          |                |     |         |         |
|----------------------------|-----------|----------|----------------|-----|---------|---------|
| Effect                     | system    | Estimate | Standard Error | DF  | t Value | Pr >  t |
| system                     | Bellin    | 0.3030   | 0.0277         | 805 | 10.94   | <.0001  |
| system                     | UW Health | 0.1238   | 0.0278         | 805 | 4.45    | <.0001  |
| clinic_size                |           | 0.0000   | 0.0000         | 805 | -1.24   | 0.215   |
| t7                         |           | 0.0061   | 0.0032         | 256 | 1.90    | 0.059   |
| PF_t7                      |           | -0.0054  | 0.0045         | 805 | -1.21   | 0.228   |
| t13                        |           | 0.0043   | 0.0042         | 204 | 1.02    | 0.307   |
| PF_t13                     |           | 0.0041   | 0.0060         | 805 | 0.68    | 0.496   |
| PPC_t13                    |           | -0.0106  | 0.0031         | 805 | -3.40   | 0.001   |
| PFandPPC_t13               |           | 0.0031   | 0.0045         | 805 | 0.70    | 0.487   |

| Estimates         |          |                |     |         |         |
|-------------------|----------|----------------|-----|---------|---------|
| Label             | Estimate | Standard Error | DF  | t Value | Pr >  t |
| NOINT Chg         | 0.1615   | 0.0307         | 805 | 5.26    | <.0001  |
| PF Only Chg       | 0.1127   | 0.0316         | 805 | 3.56    | 0.000   |
| PPC Only Chg      | 0.0347   | 0.0303         | 805 | 1.14    | 0.253   |
| PF & PPC Chg      | 0.0234   | 0.0315         | 805 | 0.74    | 0.459   |
| PF Only vs NOINT  | -0.0488  | 0.0431         | 805 | -1.13   | 0.258   |
| PPC Only vs NOINT | -0.1268  | 0.0373         | 805 | -3.40   | 0.001   |

|                                 |         |        |     |       |       |
|---------------------------------|---------|--------|-----|-------|-------|
| <b>PF Only vs PPC Only 1</b>    | 0.0780  | 0.0428 | 805 | 1.82  | 0.069 |
| <b>PF Only vs PPC Only 2</b>    | 0.1105  | 0.0387 | 805 | 2.86  | 0.004 |
| <b>PF &amp; PPC Interaction</b> | 0.0374  | 0.0538 | 805 | 0.70  | 0.487 |
| <b>PF &amp; PPC vs NOINT</b>    | -0.1381 | 0.0430 | 805 | -3.21 | 0.001 |

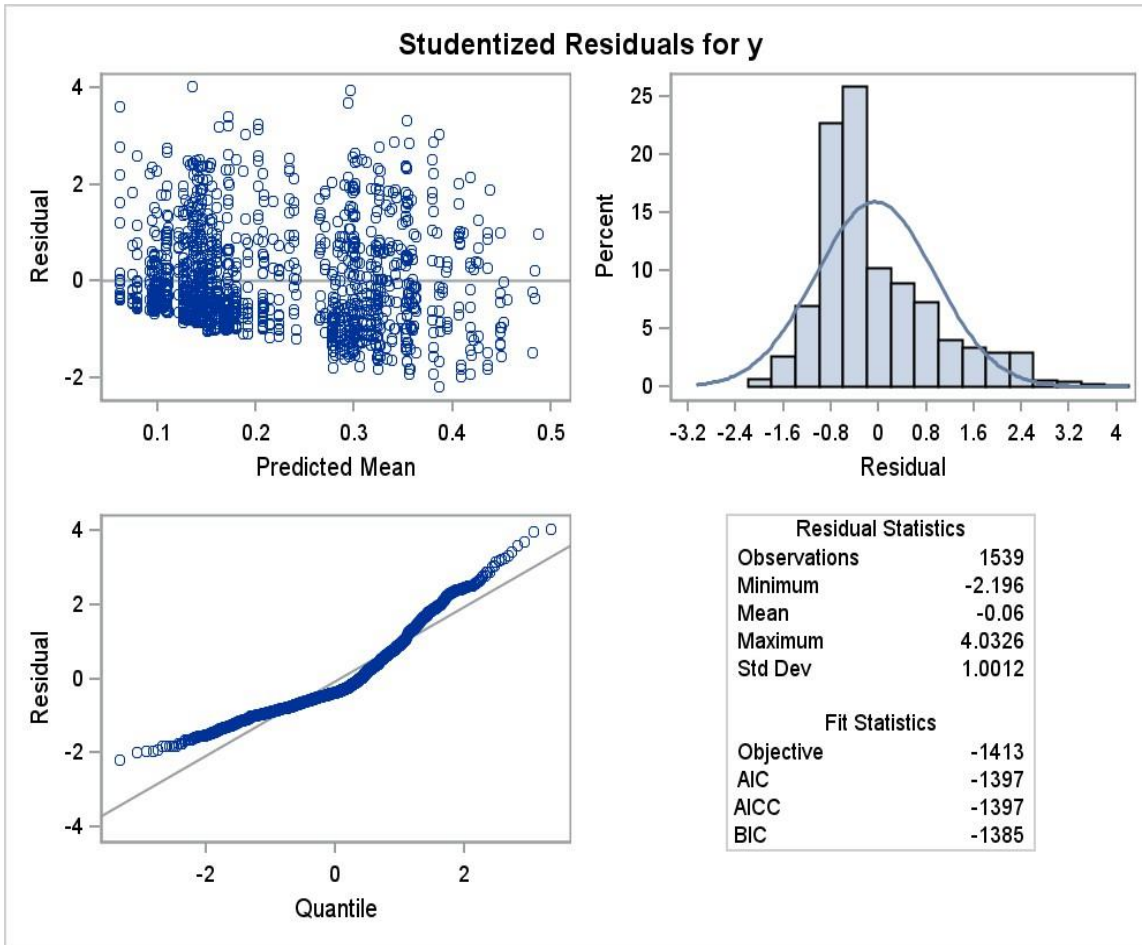



### Conditional Studentized Residuals for y

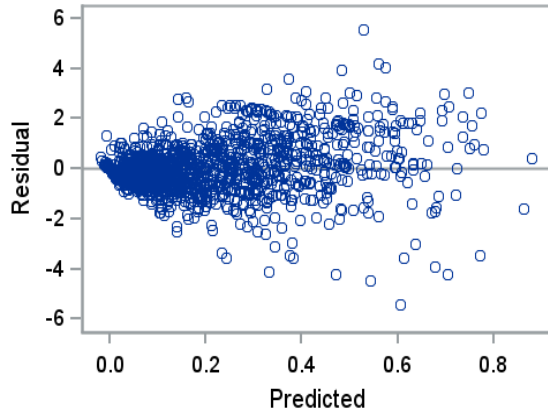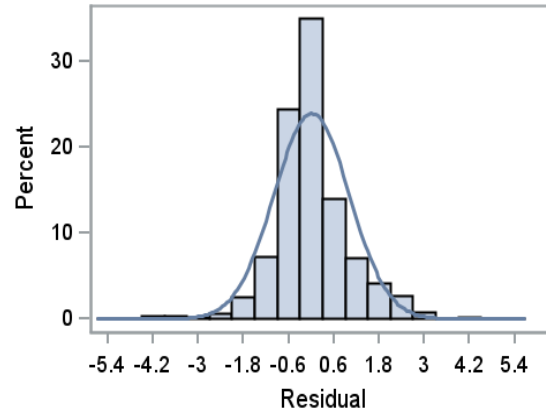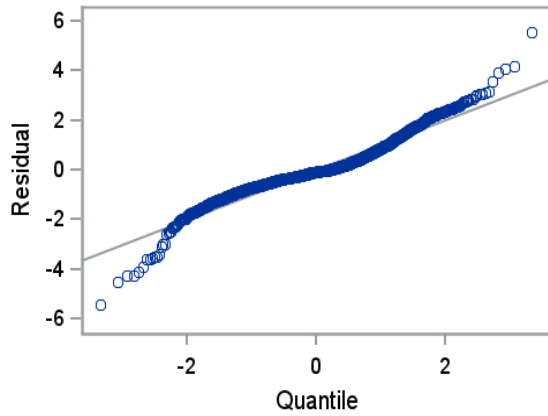

| Residual Statistics |        |
|---------------------|--------|
| Observations        | 1539   |
| Minimum             | -5.41  |
| Mean                | 0.0095 |
| Maximum             | 5.5572 |
| Std Dev             | 0.9997 |

  

| Fit Statistics |       |
|----------------|-------|
| Objective      | -1413 |
| AIC            | -1397 |
| AICC           | -1397 |
| BIC            | -1385 |

Appendix A6 – Percent of Opioid Patients with PHQ-9 Depression Screen in Last 12 Months

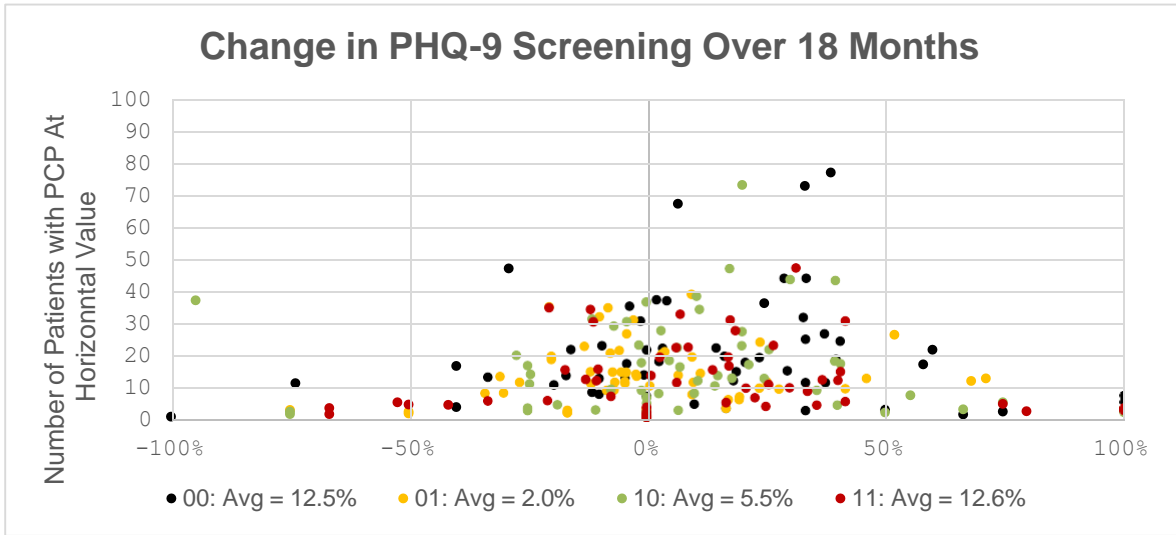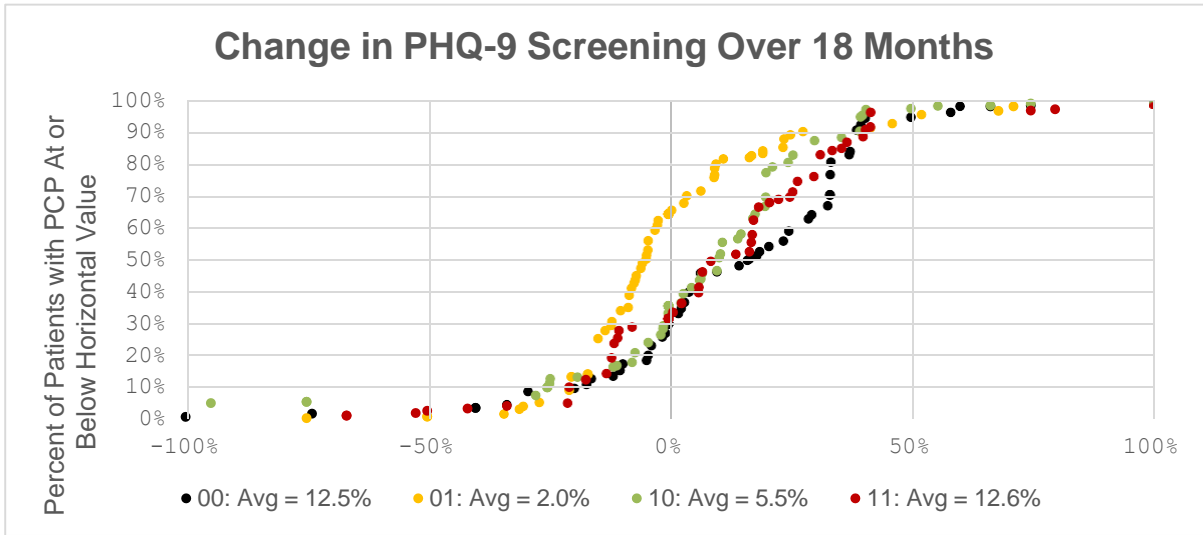

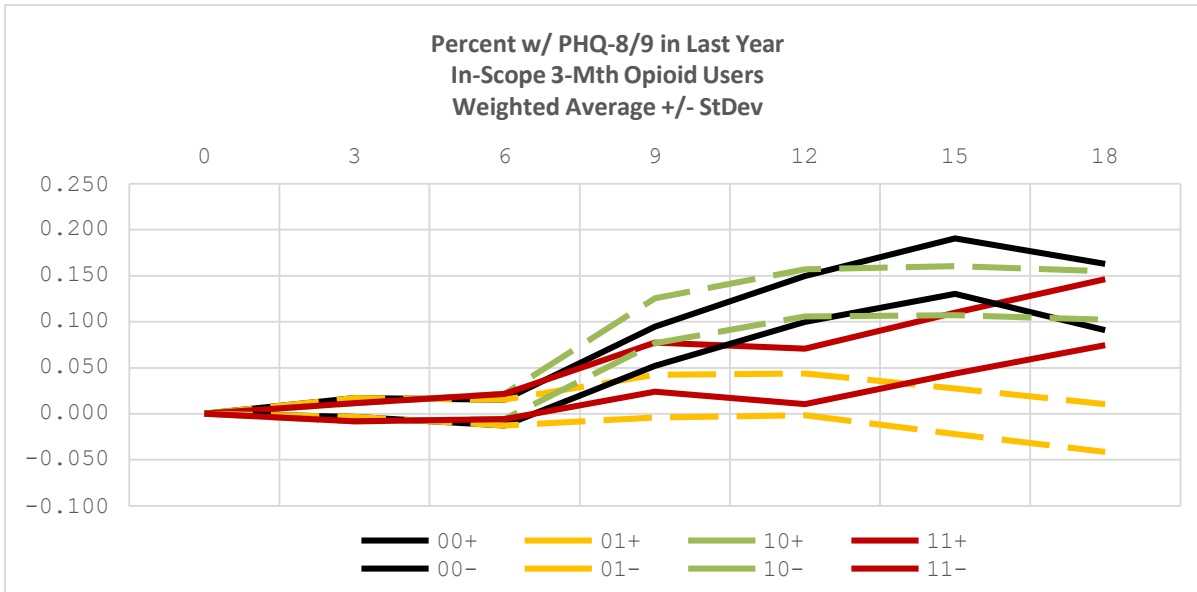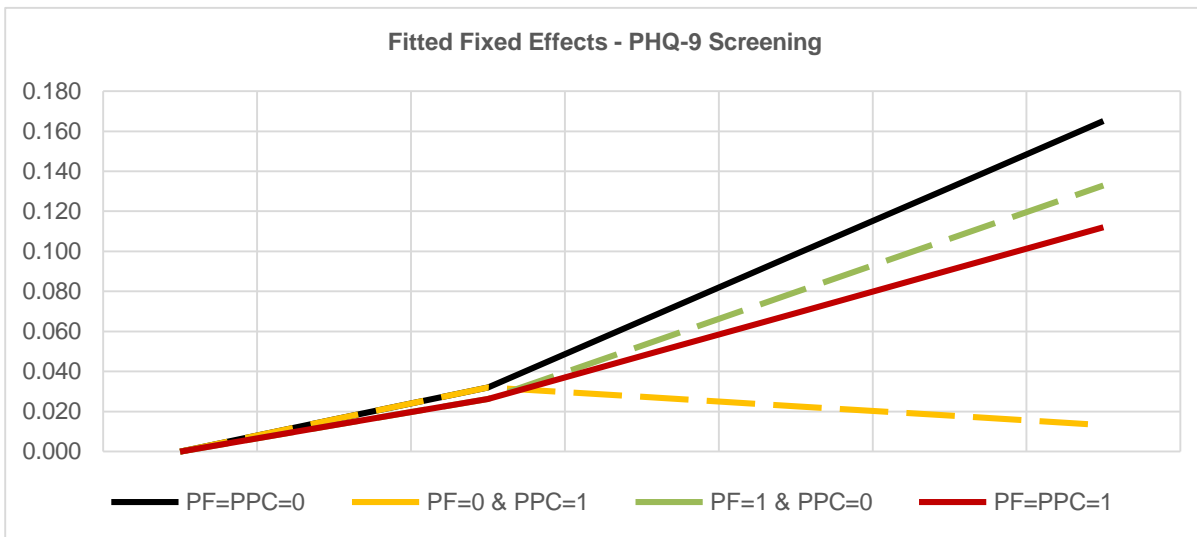

| <b>PHQ-9 Screening</b>        |             |
|-------------------------------|-------------|
| Estimated Fixed Effect Curves | Differences |

| Study Month                         | PF=PPC=0 | PF=0 & PPC=1 | PF=1 & PPC=0 | PF=PPC=1 | PF=0 & PPC=1 minus PF=PPC=0 | PF=1 & PPC=0 minus PF=PPC=0 | PF=PPC=1 minus PF=PPC=0 |
|-------------------------------------|----------|--------------|--------------|----------|-----------------------------|-----------------------------|-------------------------|
| 0                                   | 0.000    | 0.000        | 0.000        | 0.000    | 0.000                       | 0.000                       | 0.000                   |
| 3                                   | 0.016    | 0.016        | 0.013        | 0.013    | 0.000                       | -0.003                      | -0.003                  |
| 6                                   | 0.032    | 0.032        | 0.026        | 0.026    | 0.000                       | -0.006                      | -0.006                  |
| 9                                   | 0.065    | 0.027        | 0.053        | 0.048    | -0.038                      | -0.012                      | -0.018                  |
| 12                                  | 0.099    | 0.023        | 0.080        | 0.069    | -0.076                      | -0.019                      | -0.029                  |
| 15                                  | 0.132    | 0.018        | 0.106        | 0.091    | -0.114                      | -0.026                      | -0.041                  |
| 18                                  | 0.165    | 0.013        | 0.133        | 0.112    | -0.152                      | -0.032                      | -0.053                  |
| <b>Std Dev of Estimated Values</b>  |          |              |              |          |                             |                             |                         |
| 0                                   | 0.000    | 0.000        | 0.000        | 0.000    | 0.000                       | 0.000                       | 0.000                   |
| 3                                   | 0.007    | 0.007        | 0.008        | 0.008    | 0.000                       | 0.010                       | 0.010                   |
| 6                                   | 0.015    | 0.015        | 0.015        | 0.015    | 0.000                       | 0.021                       | 0.021                   |
| 9                                   | 0.016    | 0.016        | 0.021        | 0.021    | 0.009                       | 0.025                       | 0.025                   |
| 12                                  | 0.019    | 0.019        | 0.030        | 0.030    | 0.019                       | 0.034                       | 0.034                   |
| 15                                  | 0.024    | 0.023        | 0.040        | 0.040    | 0.028                       | 0.044                       | 0.044                   |
| 18                                  | 0.029    | 0.029        | 0.050        | 0.051    | 0.038                       | 0.055                       | 0.055                   |
| <b>t-ratios of Estimated Values</b> |          |              |              |          |                             |                             |                         |
| 0                                   |          |              |              |          |                             |                             |                         |
| 3                                   | 2.17     | 2.17         | 1.71         | 1.71     |                             | -0.28                       | -0.28                   |
| 6                                   | 2.17     | 2.17         | 1.71         | 1.71     |                             | -0.28                       | -0.28                   |
| 9                                   | 4.10     | 1.74         | 2.50         | 2.26     | -4.01                       | -0.49                       | -0.69                   |
| 12                                  | 5.10     | 1.20         | 2.65         | 2.30     | -4.01                       | -0.56                       | -0.86                   |
| 15                                  | 5.50     | 0.76         | 2.66         | 2.25     | -4.01                       | -0.58                       | -0.93                   |
| 18                                  | 5.63     | 0.46         | 2.64         | 2.21     | -4.01                       | -0.58                       | -0.96                   |

| Covariance Parameter Estimates |         |          |          |                       |  |        |
|--------------------------------|---------|----------|----------|-----------------------|--|--------|
| Cov Parm                       | Subject | Estimate |          | Std Dev & Correlation |  |        |
| Intercept                      | Clinic  | 0.0080   | Clinic   | 0.0892                |  |        |
| UN(1,1)                        | PCP     | 0.0289   |          |                       |  |        |
| UN(2,1)                        | PCP     | (0.0012) | PCP      |                       |  |        |
| UN(2,2)                        | PCP     | 0.0003   |          | 0.1699                |  |        |
| UN(3,1)                        | PCP     | (0.0003) |          | -37.7%                |  | 0.0184 |
| UN(3,2)                        | PCP     | (0.0003) |          | -9.8%                 |  | -73.7% |
| UN(3,3)                        | PCP     | 0.0004   |          | 0.0199                |  |        |
| Residual                       |         | 0.1029   | Residual | 0.3208                |  |        |

| Solution for Fixed Effects |           |          |                |     |         |         |
|----------------------------|-----------|----------|----------------|-----|---------|---------|
| Effect                     | system    | Estimate | Standard Error | DF  | t Value | Pr >  t |
| system                     | Bellin    | 0.3320   | 0.0308         | 805 | 10.77   | <.0001  |
| system                     | UW Health | 0.2539   | 0.0303         | 805 | 8.39    | <.0001  |
| clinic_size                |           | 0.0000   | 0.0000         | 805 | -0.36   | 0.719   |
| t7                         |           | 0.0053   | 0.0025         | 256 | 2.17    | 0.031   |
| PF_t7                      |           | -0.0010  | 0.0035         | 805 | -0.27   | 0.784   |
| t13                        |           | 0.0057   | 0.0034         | 204 | 1.70    | 0.091   |
| PF_t13                     |           | -0.0012  | 0.0049         | 805 | -0.25   | 0.801   |
| PPC_t13                    |           | -0.0127  | 0.0032         | 805 | -4.01   | <.0001  |
| PFandPPC_t13               |           | 0.0109   | 0.0046         | 805 | 2.40    | 0.017   |

| Estimates         |          |                |     |         |         |
|-------------------|----------|----------------|-----|---------|---------|
| Label             | Estimate | Standard Error | DF  | t Value | Pr >  t |
| NOINT Chg         | 0.1651   | 0.0304         | 805 | 5.42    | <.0001  |
| PF Only Chg       | 0.1330   | 0.0313         | 805 | 4.25    | <.0001  |
| PPC Only Chg      | 0.0132   | 0.0299         | 805 | 0.44    | 0.661   |
| PF & PPC Chg      | 0.1121   | 0.0313         | 805 | 3.58    | 0.000   |
| PF Only vs NOINT  | -0.0321  | 0.0425         | 805 | -0.76   | 0.450   |
| PPC Only vs NOINT | -0.1519  | 0.0379         | 805 | -4.01   | <.0001  |

|                       |         |        |     |       |       |
|-----------------------|---------|--------|-----|-------|-------|
| PF Only vs PPC Only 1 | 0.1199  | 0.0422 | 805 | 2.84  | 0.005 |
| PF Only vs PPC Only 2 | 0.1256  | 0.0387 | 805 | 3.25  | 0.001 |
| PF & PPC Interaction  | 0.1311  | 0.0547 | 805 | 2.40  | 0.017 |
| PF & PPC vs NOINT     | -0.0530 | 0.0425 | 805 | -1.25 | 0.213 |

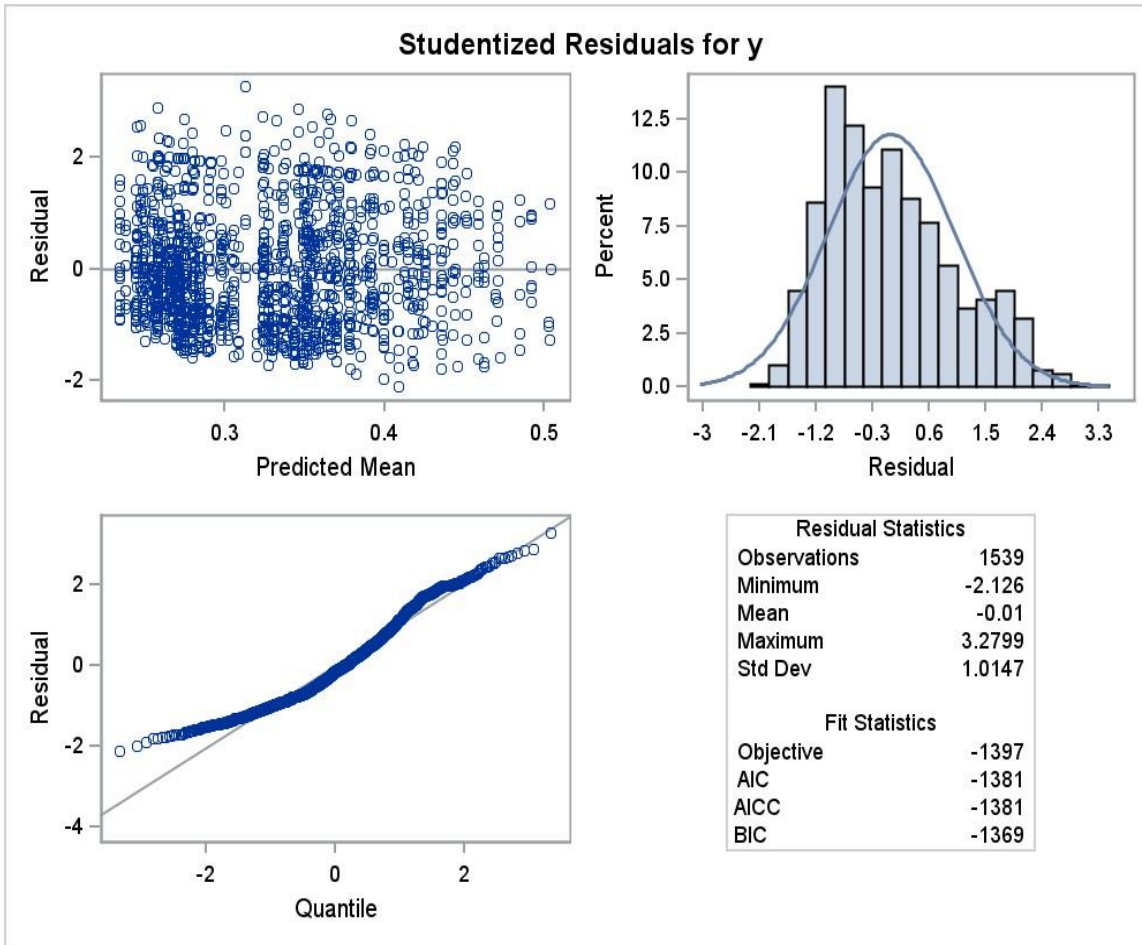

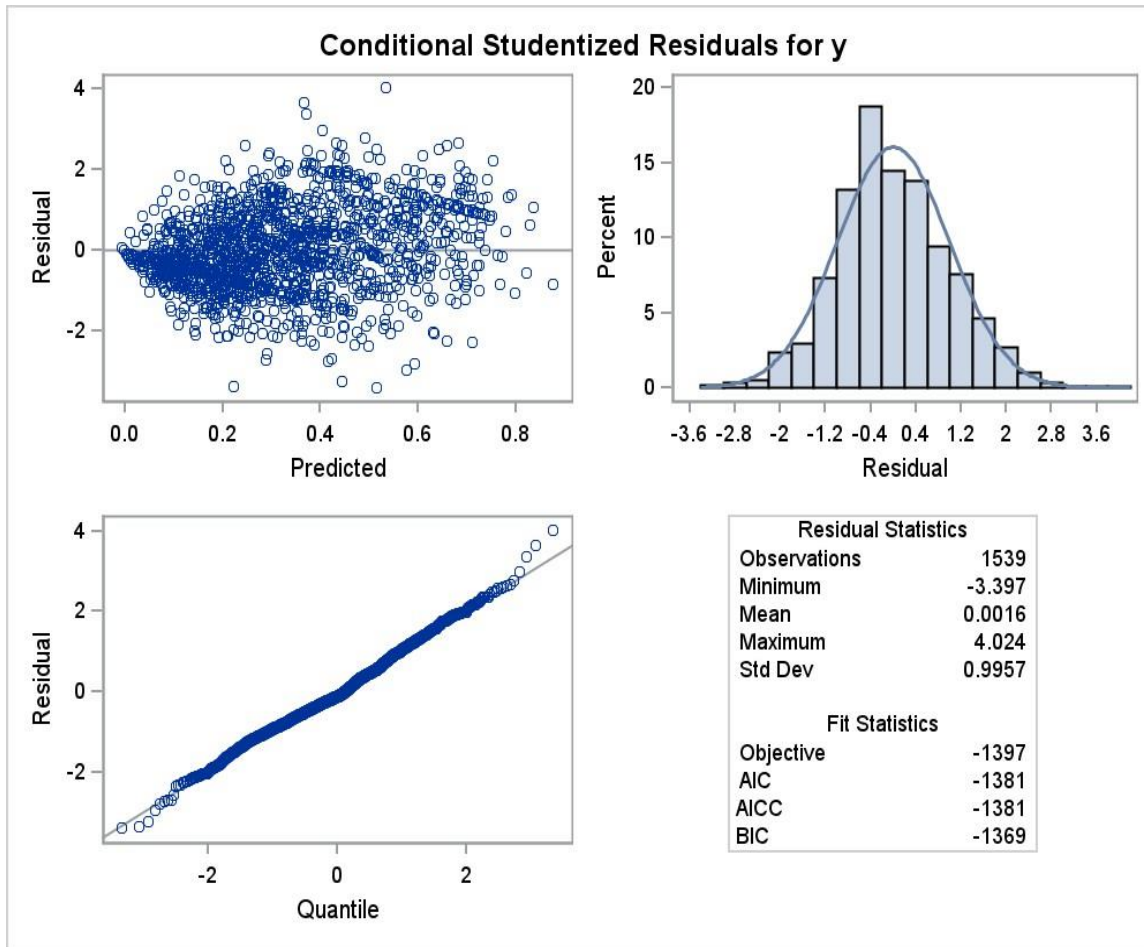

Appendix A7 – Percent of Opioid Patients with PEG-3 Pain Screen in Last 12 Months

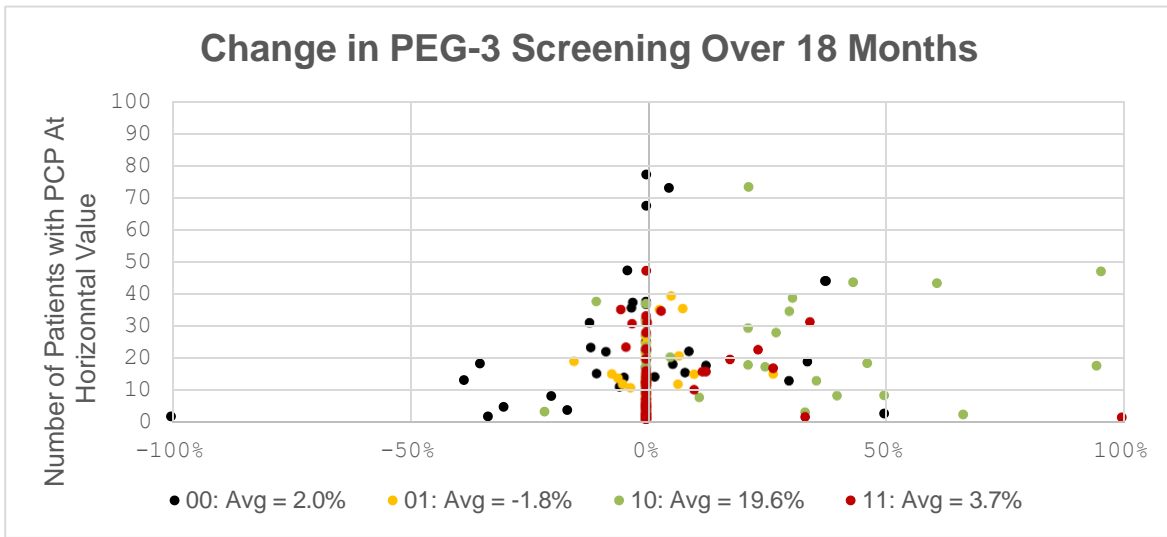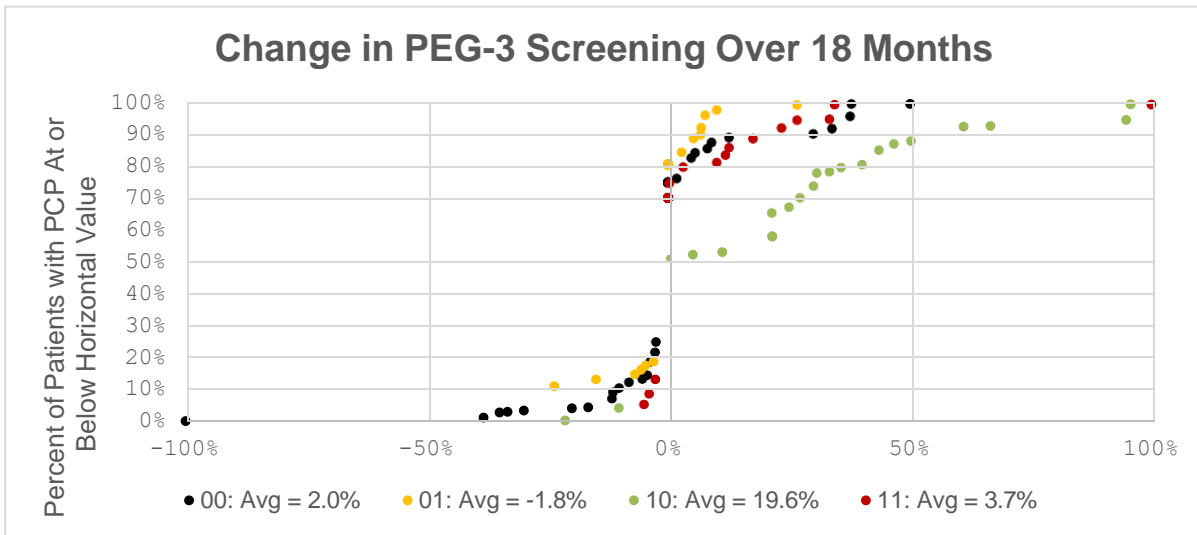



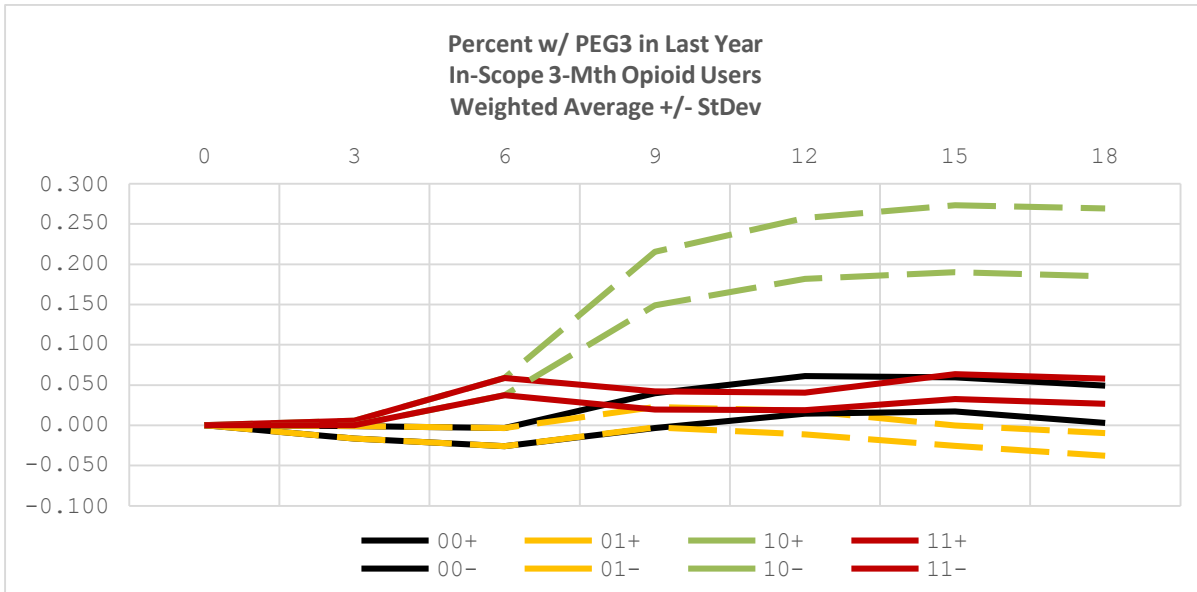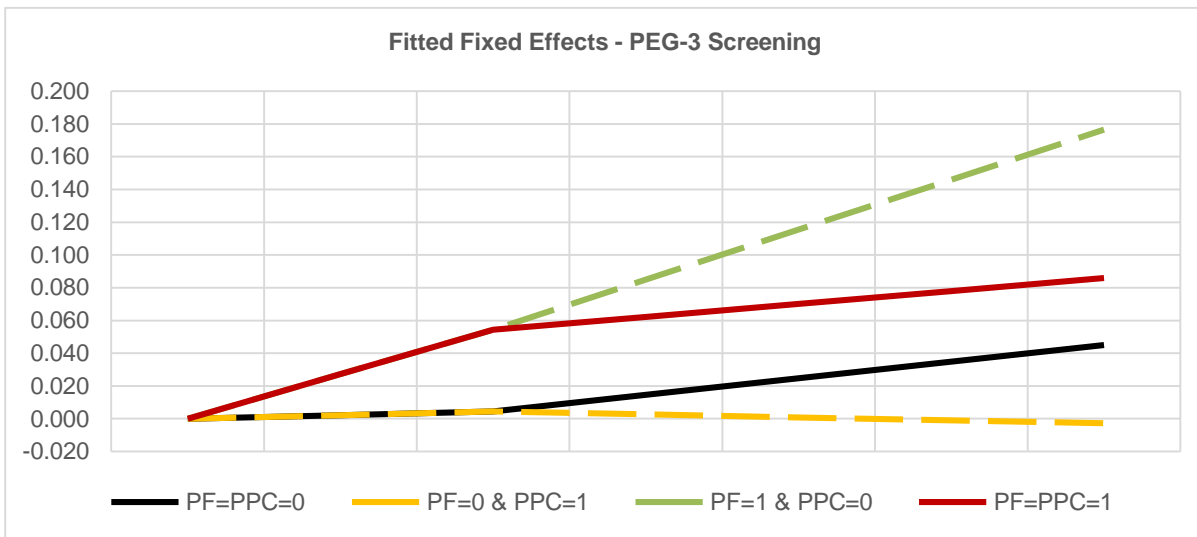

| <b>PEG-3 Screening</b> |                               |             |
|------------------------|-------------------------------|-------------|
|                        | Estimated Fixed Effect Curves | Differences |

| Study Month                         | PF=PPC=0 | PF=0 & PPC=1 | PF=1 & PPC=0 | PF=PPC=1 | PF=0 & PPC=1 minus PF=PPC=0 | PF=1 & PPC=0 minus PF=PPC=0 | PF=PPC=1 minus PF=PPC=0 |
|-------------------------------------|----------|--------------|--------------|----------|-----------------------------|-----------------------------|-------------------------|
| 0                                   | 0.000    | 0.000        | 0.000        | 0.000    | 0.000                       | 0.000                       | 0.000                   |
| 3                                   | 0.002    | 0.002        | 0.027        | 0.027    | 0.000                       | 0.025                       | 0.025                   |
| 6                                   | 0.004    | 0.004        | 0.054        | 0.054    | 0.000                       | 0.050                       | 0.050                   |
| 9                                   | 0.015    | 0.003        | 0.085        | 0.062    | -0.012                      | 0.070                       | 0.048                   |
| 12                                  | 0.025    | 0.001        | 0.115        | 0.070    | -0.024                      | 0.091                       | 0.045                   |
| 15                                  | 0.035    | -0.001       | 0.146        | 0.078    | -0.036                      | 0.111                       | 0.043                   |
| 18                                  | 0.045    | -0.003       | 0.177        | 0.086    | -0.048                      | 0.132                       | 0.041                   |
| <b>Std Dev of Estimated Values</b>  |          |              |              |          |                             |                             |                         |
| 0                                   | 0.000    | 0.000        | 0.000        | 0.000    | 0.000                       | 0.000                       | 0.000                   |
| 3                                   | 0.006    | 0.006        | 0.007        | 0.007    | 0.000                       | 0.009                       | 0.009                   |
| 6                                   | 0.013    | 0.013        | 0.013        | 0.013    | 0.000                       | 0.018                       | 0.018                   |
| 9                                   | 0.014    | 0.013        | 0.014        | 0.014    | 0.007                       | 0.019                       | 0.019                   |
| 12                                  | 0.016    | 0.016        | 0.017        | 0.016    | 0.014                       | 0.023                       | 0.023                   |
| 15                                  | 0.019    | 0.019        | 0.021        | 0.020    | 0.021                       | 0.028                       | 0.028                   |
| 18                                  | 0.023    | 0.023        | 0.025        | 0.024    | 0.028                       | 0.034                       | 0.033                   |
| <b>t-ratios of Estimated Values</b> |          |              |              |          |                             |                             |                         |
| 0                                   |          |              |              |          |                             |                             |                         |
| 3                                   | 0.35     | 0.35         | 4.14         | 4.14     |                             | 2.78                        | 2.78                    |
| 6                                   | 0.35     | 0.35         | 4.14         | 4.14     |                             | 2.78                        | 2.78                    |
| 9                                   | 1.08     | 0.20         | 6.02         | 4.48     | -1.72                       | 3.64                        | 2.49                    |
| 12                                  | 1.54     | 0.05         | 6.86         | 4.29     | -1.72                       | 3.94                        | 2.00                    |
| 15                                  | 1.79     | -0.05        | 7.08         | 3.91     | -1.72                       | 3.95                        | 1.56                    |
| 18                                  | 1.93     | -0.12        | 7.06         | 3.56     | -1.72                       | 3.86                        | 1.22                    |

| Covariance Parameter Estimates |         |          |          |                       |  |        |        |
|--------------------------------|---------|----------|----------|-----------------------|--|--------|--------|
| Cov Parm                       | Subject | Estimate |          | Std Dev & Correlation |  |        |        |
| Intercept                      | Clinic  | 0.0081   | Clinic   | 0.0902                |  |        |        |
| UN(1,1)                        | PCP     | 0.0107   |          |                       |  |        |        |
| UN(2,1)                        | PCP     | (0.0007) | PCP      |                       |  |        |        |
| UN(2,2)                        | PCP     | 0.0003   |          | 0.1035                |  |        |        |
| UN(3,1)                        | PCP     | 0.0006   |          | -35.9%                |  | 0.0177 |        |
| UN(3,2)                        | PCP     | (0.0003) |          | 30.3%                 |  | -86.5% | 0.0182 |
| UN(3,3)                        | PCP     | 0.0003   |          |                       |  |        |        |
| Residual                       |         | 0.0479   | Residual | 0.2189                |  |        |        |

| Solution for Fixed Effects |           |          |                |     |         |         |
|----------------------------|-----------|----------|----------------|-----|---------|---------|
| Effect                     | system    | Estimate | Standard Error | DF  | t Value | Pr >  t |
| system                     | Bellin    | 0.0124   | 0.0274         | 805 | 0.45    | 0.6505  |
| system                     | UW Health | 0.0577   | 0.0281         | 805 | 2.06    | 0.0401  |
| clinic_size                |           | 0.0000   | 0.0000         | 805 | 1.25    | 0.213   |
| t7                         |           | 0.0007   | 0.0021         | 256 | 0.35    | 0.726   |
| PF_t7                      |           | 0.0083   | 0.0030         | 805 | 2.78    | 0.006   |
| t13                        |           | 0.0027   | 0.0027         | 204 | 1.00    | 0.318   |
| PF_t13                     |           | -0.0015  | 0.0038         | 805 | -0.40   | 0.690   |
| PPC_t13                    |           | -0.0040  | 0.0023         | 805 | -1.71   | 0.087   |
| PFandPPC_t13               |           | -0.0036  | 0.0033         | 805 | -1.07   | 0.285   |

| Estimates         |          |                |     |         |         |
|-------------------|----------|----------------|-----|---------|---------|
| Label             | Estimate | Standard Error | DF  | t Value | Pr >  t |
| NOINT Chg         | 0.0451   | 0.0234         | 805 | 1.92    | 0.055   |
| PF Only Chg       | 0.1766   | 0.0241         | 805 | 7.34    | <.0001  |
| PPC Only Chg      | -0.0027  | 0.0230         | 805 | -0.12   | 0.908   |
| PF & PPC Chg      | 0.0859   | 0.0237         | 805 | 3.63    | 0.000   |
| PF Only vs NOINT  | 0.1315   | 0.0334         | 805 | 3.94    | <.0001  |
| PPC Only vs NOINT | -0.0477  | 0.0278         | 805 | -1.71   | 0.087   |

|                       |         |        |     |       |        |
|-----------------------|---------|--------|-----|-------|--------|
| PF Only vs PPC Only 1 | 0.1792  | 0.0331 | 805 | 5.41  | <.0001 |
| PF Only vs PPC Only 2 | 0.1293  | 0.0284 | 805 | 4.56  | <.0001 |
| PF & PPC Interaction  | -0.0429 | 0.0401 | 805 | -1.07 | 0.285  |
| PF & PPC vs NOINT     | 0.0409  | 0.0332 | 805 | 1.23  | 0.218  |

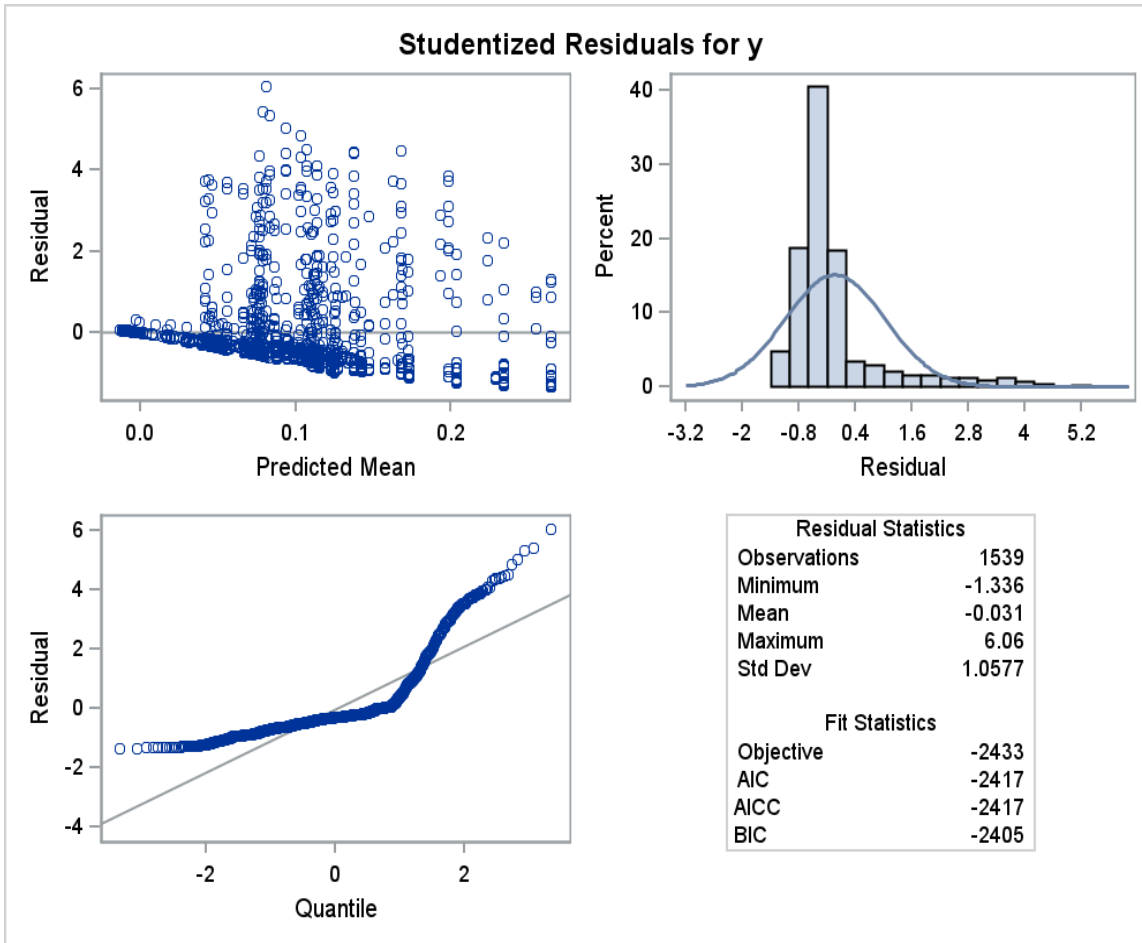

### Conditional Studentized Residuals for y

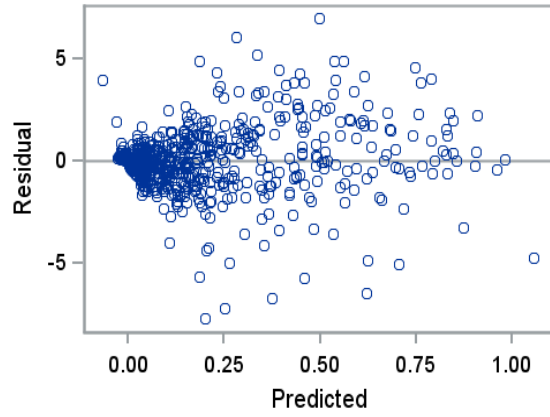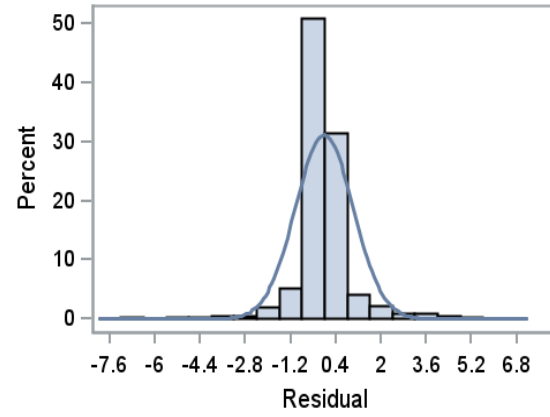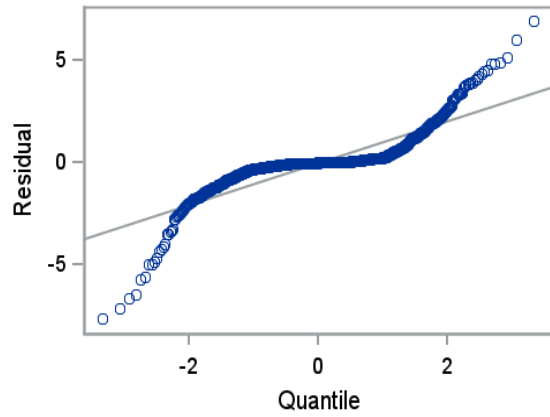

| Residual Statistics |        |
|---------------------|--------|
| Observations        | 1539   |
| Minimum             | -7.685 |
| Mean                | -0.01  |
| Maximum             | 6.9413 |
| Std Dev             | 1.0246 |

  

| Fit Statistics |       |
|----------------|-------|
| Objective      | -2433 |
| AIC            | -2417 |
| AICC           | -2417 |
| BIC            | -2405 |

Appendix B – Primary Model Results (All Opioid Patients)

Appendix B1 – Average MME Prescribed in Last 3 Months (All Opioid Patients)

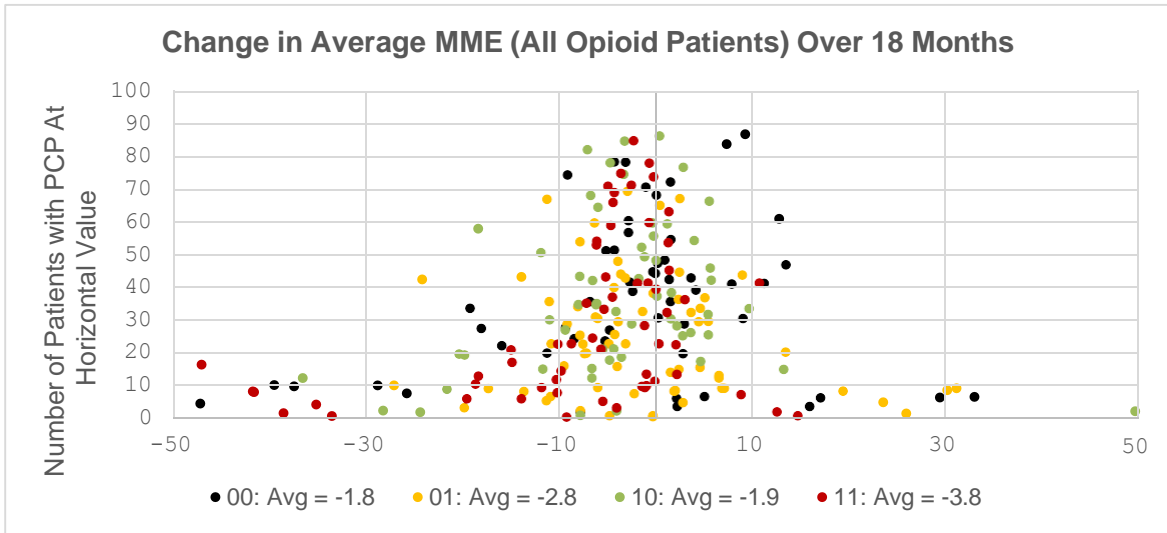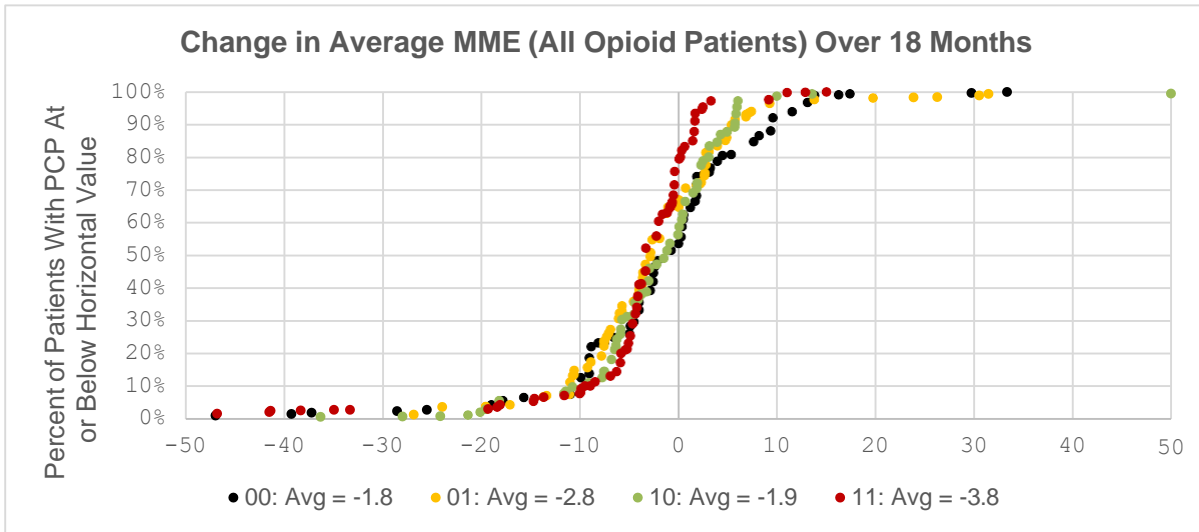

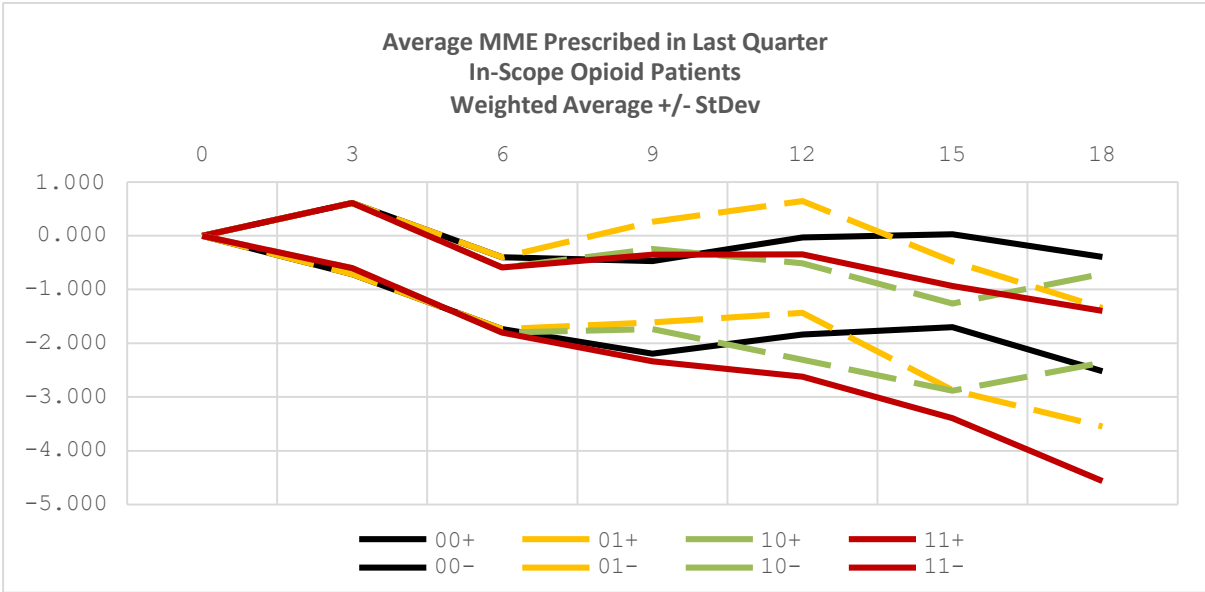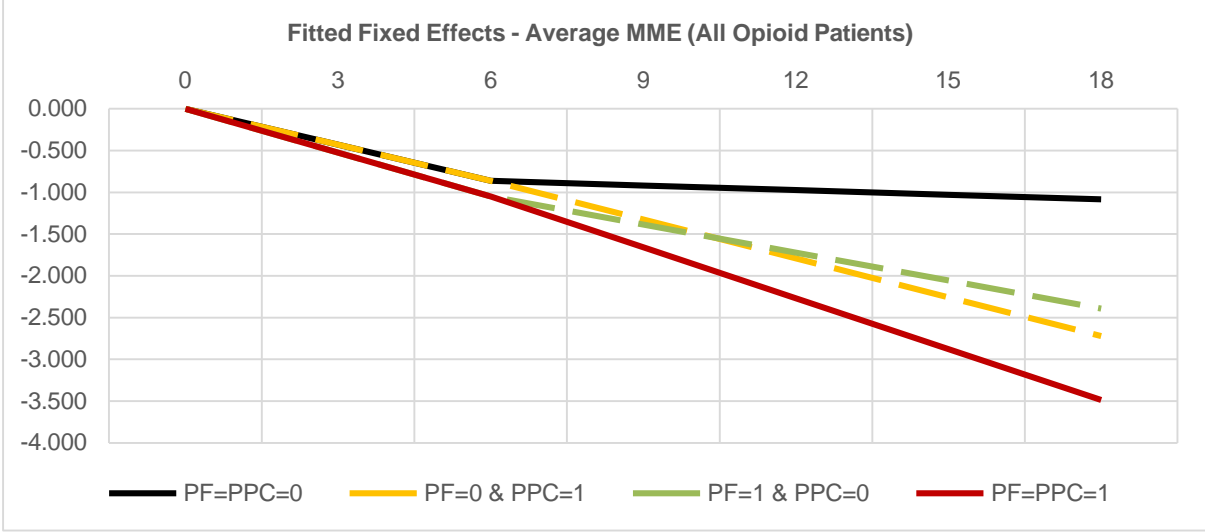



| Average MME (All Opioid Patients) |                               |              |              |          |                             |                             |                         |
|-----------------------------------|-------------------------------|--------------|--------------|----------|-----------------------------|-----------------------------|-------------------------|
| Study Month                       | Estimated Fixed Effect Curves |              |              |          | Differences                 |                             |                         |
|                                   | PF=PPC=0                      | PF=0 & PPC=1 | PF=1 & PPC=0 | PF=PPC=1 | PF=0 & PPC=1 minus PF=PPC=0 | PF=1 & PPC=0 minus PF=PPC=0 | PF=PPC=1 minus PF=PPC=0 |
| 0                                 | 0.000                         | 0.000        | 0.000        | 0.000    | 0.000                       | 0.000                       | 0.000                   |
| 3                                 | -0.431                        | -0.431       | -0.525       | -0.525   | 0.000                       | -0.094                      | -0.094                  |
| 6                                 | -0.862                        | -0.862       | -1.050       | -1.050   | 0.000                       | -0.189                      | -0.189                  |
| 9                                 | -0.917                        | -1.327       | -1.386       | -1.659   | -0.409                      | -0.468                      | -0.742                  |
| 12                                | -0.973                        | -1.792       | -1.721       | -2.268   | -0.818                      | -0.748                      | -1.295                  |
| 15                                | -1.029                        | -2.257       | -2.056       | -2.877   | -1.228                      | -1.027                      | -1.848                  |
| 18                                | -1.085                        | -2.722       | -2.392       | -3.486   | -1.637                      | -1.307                      | -2.402                  |
| Std Dev of Estimated Values       |                               |              |              |          |                             |                             |                         |
| 0                                 | 0.000                         | 0.000        | 0.000        | 0.000    | 0.000                       | 0.000                       | 0.000                   |
| 3                                 | 0.260                         | 0.260        | 0.252        | 0.252    | 0.000                       | 0.352                       | 0.352                   |
| 6                                 | 0.519                         | 0.519        | 0.505        | 0.505    | 0.000                       | 0.703                       | 0.703                   |
| 9                                 | 0.493                         | 0.493        | 0.480        | 0.482    | 0.231                       | 0.661                       | 0.662                   |
| 12                                | 0.523                         | 0.529        | 0.512        | 0.521    | 0.462                       | 0.700                       | 0.708                   |
| 15                                | 0.601                         | 0.618        | 0.590        | 0.610    | 0.693                       | 0.810                       | 0.825                   |
| 18                                | 0.711                         | 0.740        | 0.699        | 0.731    | 0.924                       | 0.965                       | 0.990                   |
| t-ratios of Estimated Values      |                               |              |              |          |                             |                             |                         |
| 0                                 |                               |              |              |          |                             |                             |                         |
| 3                                 | -1.66                         | -1.66        | -2.08        | -2.08    |                             | -0.27                       | -0.27                   |
| 6                                 | -1.66                         | -1.66        | -2.08        | -2.08    |                             | -0.27                       | -0.27                   |
| 9                                 | -1.86                         | -2.69        | -2.88        | -3.44    | -1.77                       | -0.71                       | -1.12                   |
| 12                                | -1.86                         | -3.38        | -3.36        | -4.35    | -1.77                       | -1.07                       | -1.83                   |
| 15                                | -1.71                         | -3.65        | -3.49        | -4.71    | -1.77                       | -1.27                       | -2.24                   |
| 18                                | -1.53                         | -3.68        | -3.42        | -4.77    | -1.77                       | -1.35                       | -2.43                   |

| Covariance Parameter Estimates |         |          | Std Dev & Correlation |         |         |
|--------------------------------|---------|----------|-----------------------|---------|---------|
| Cov Parm                       | Subject | Estimate |                       |         |         |
| Intercept                      | Clinic  | 3.6      | Clinic                | 1.90    |         |
| UN(1,1)                        | PCP     | 85.4     |                       |         |         |
| UN(2,1)                        | PCP     | (0.83)   |                       |         |         |
| UN(2,2)                        | PCP     | 0.066    | PCP                   | 9.24    |         |
| UN(3,1)                        | PCP     | (0.18)   |                       | -35.0%  | 0.26    |
| UN(3,2)                        | PCP     | (0.02)   |                       | #DIV/0! | #DIV/0! |
| UN(3,3)                        | PCP     | -        |                       |         | -       |
| Residual                       |         | 628.6    | Residual              | 25.07   |         |

| Solution for Fixed Effects |           |          |                |     |         |         |
|----------------------------|-----------|----------|----------------|-----|---------|---------|
| Effect                     | system    | Estimate | Standard Error | DF  | t Value | Pr >  t |
| system                     | Bellin    | 31.948   | 1.176          | 865 | 27.17   | <.0001  |
| system                     | UW Health | 43.227   | 1.002          | 865 | 43.15   | <.0001  |
| clinic_size                |           | 0.000    | 0.000          | 865 | -0.51   | 0.613   |
| t7                         |           | -0.144   | 0.087          | 263 | -1.66   | 0.098   |
| PF_t7                      |           | -0.031   | 0.117          | 865 | -0.27   | 0.789   |
| t13                        |           | 0.125    | 0.117          | 214 | 1.07    | 0.287   |
| PF_t13                     |           | -0.062   | 0.162          | 865 | -0.38   | 0.703   |
| PPC_t13                    |           | -0.136   | 0.077          | 865 | -1.77   | 0.077   |
| PFandPPC_t13               |           | 0.045    | 0.108          | 865 | 0.42    | 0.676   |

| Estimates                       |          |                |     |         |         |
|---------------------------------|----------|----------------|-----|---------|---------|
| Label                           | Estimate | Standard Error | DF  | t Value | Pr >  t |
| <b>NOINT Chg</b>                | -1.0854  | 0.7118         | 865 | -1.52   | 0.1276  |
| <b>PF Only Chg</b>              | -2.3925  | 0.7002         | 865 | -3.42   | 0.0007  |
| <b>PPC Only Chg</b>             | -2.7227  | 0.7406         | 865 | -3.68   | 0.0003  |
| <b>PF &amp; PPC Chg</b>         | -3.4877  | 0.7310         | 865 | -4.77   | <.0001  |
| <b>PF Only vs NOINT</b>         | -1.3071  | 0.9645         | 865 | -1.36   | 0.1757  |
| <b>PPC Only vs NOINT</b>        | -1.6373  | 0.9237         | 865 | -1.77   | 0.0766  |
| <b>PF Only vs PPC Only 1</b>    | 0.3302   | 0.9868         | 865 | 0.33    | 0.7380  |
| <b>PF Only vs PPC Only 2</b>    | 0.5187   | 0.9748         | 865 | 0.53    | 0.5948  |
| <b>PF &amp; PPC Interaction</b> | 0.5421   | 1.2951         | 865 | 0.42    | 0.6756  |
| <b>PF &amp; PPC vs NOINT</b>    | -2.4023  | 0.9879         | 865 | -2.43   | 0.0152  |

### Studentized Residuals for y

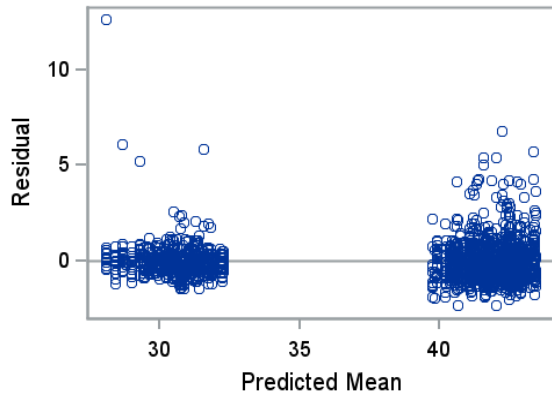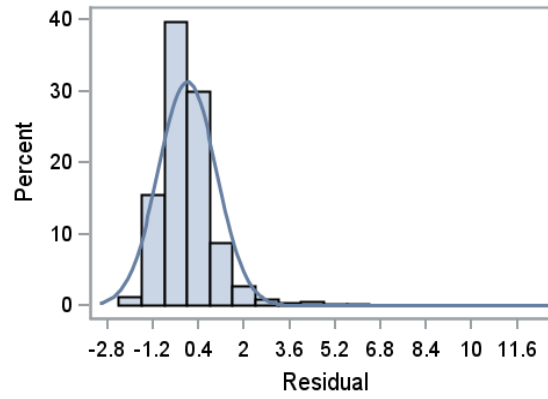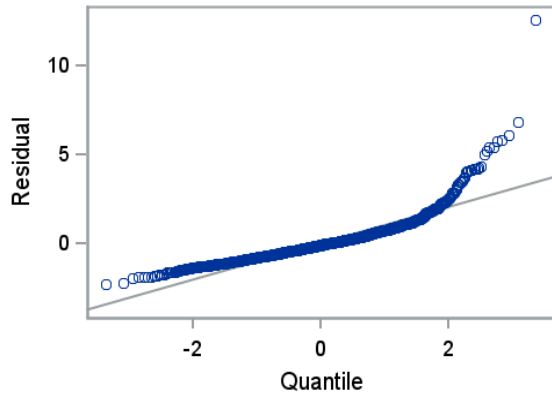

| Residual Statistics |        |
|---------------------|--------|
| Observations        | 1616   |
| Minimum             | -2.331 |
| Mean                | 0.0035 |
| Maximum             | 12.616 |
| Std Dev             | 1.0217 |

  

| Fit Statistics |       |
|----------------|-------|
| Objective      | 10750 |
| AIC            | 10764 |
| AICC           | 10764 |
| BIC            | 10775 |

### Conditional Studentized Residuals for y

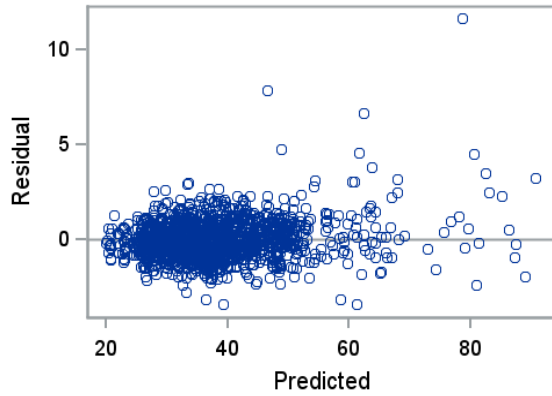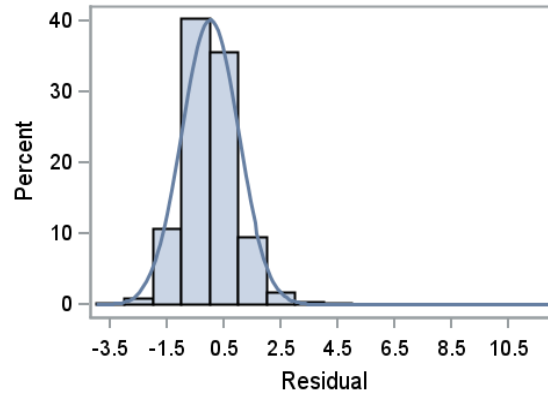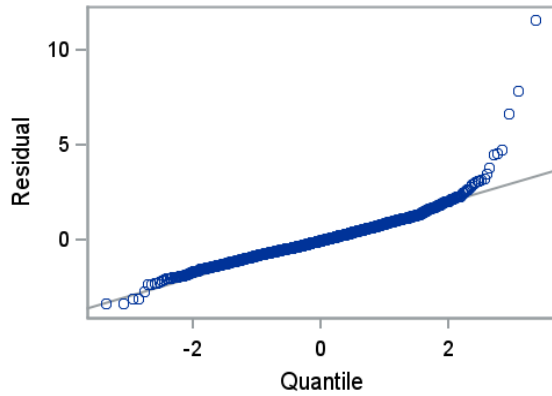

| Residual Statistics |        |
|---------------------|--------|
| Observations        | 1616   |
| Minimum             | -3.4   |
| Mean                | 0.0057 |
| Maximum             | 11.61  |
| Std Dev             | 0.9928 |

  

| Fit Statistics |       |
|----------------|-------|
| Objective      | 10750 |
| AIC            | 10764 |
| AICC           | 10764 |
| BIC            | 10775 |

Appendix B2 – Percent of Opioid Patients with Average MME  $\geq$  90 mg/day (All Opioid Patients)

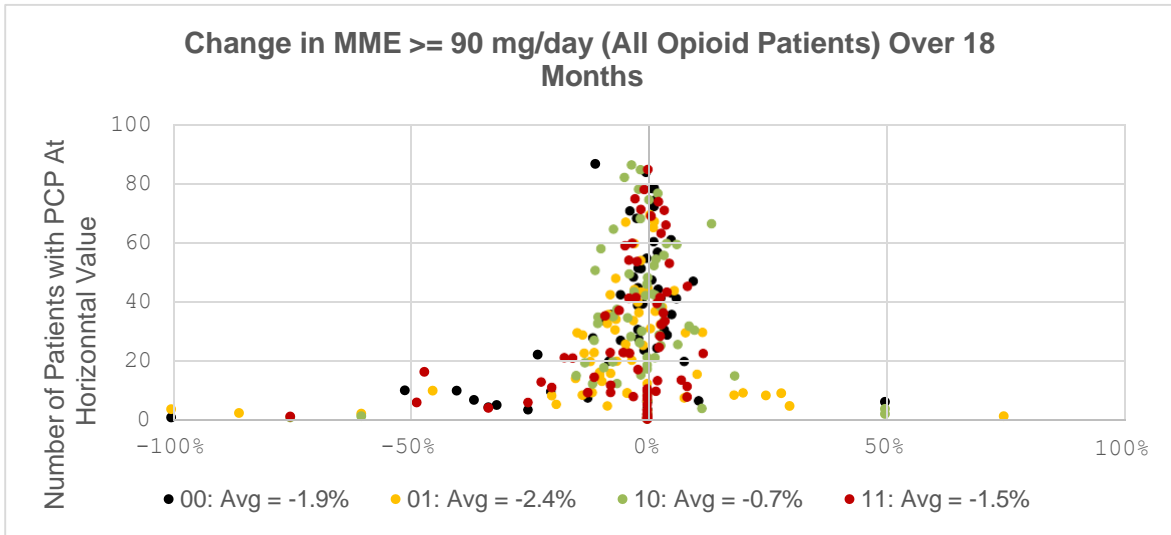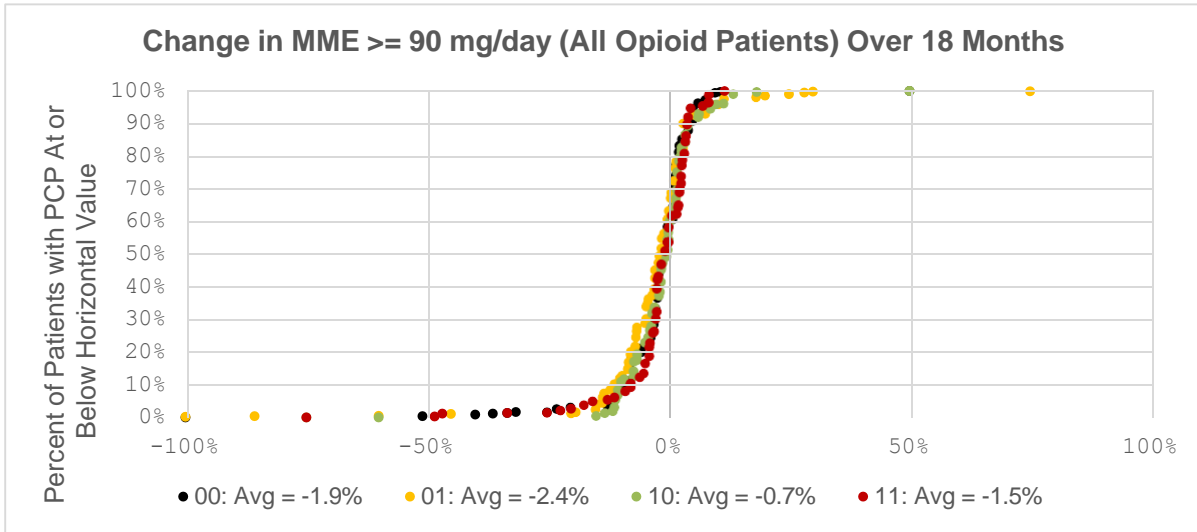

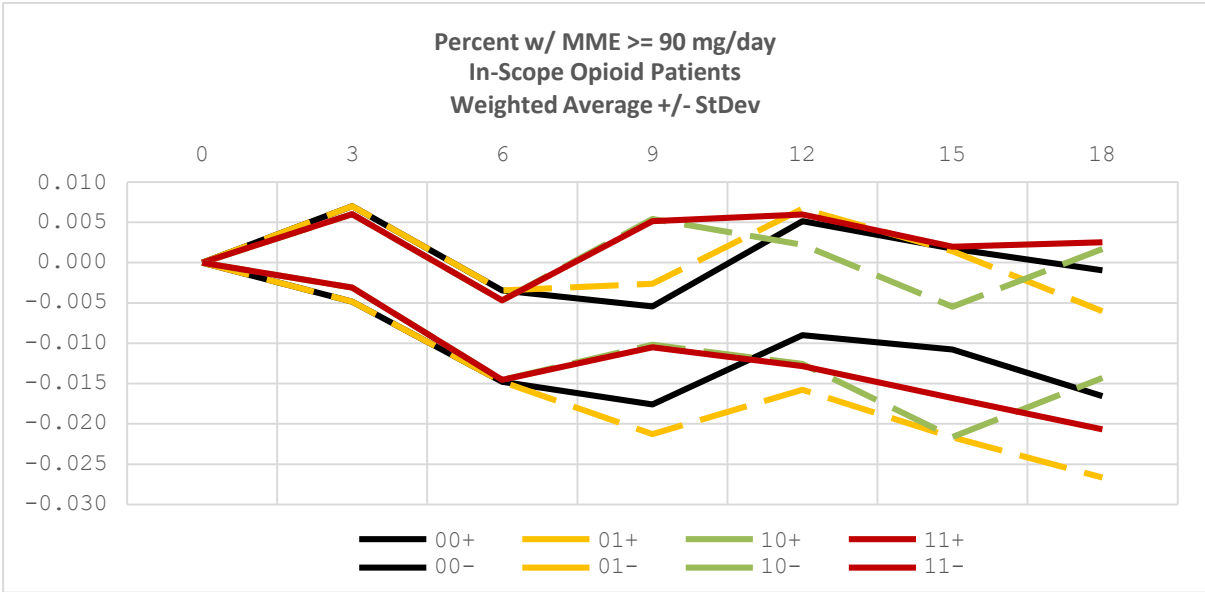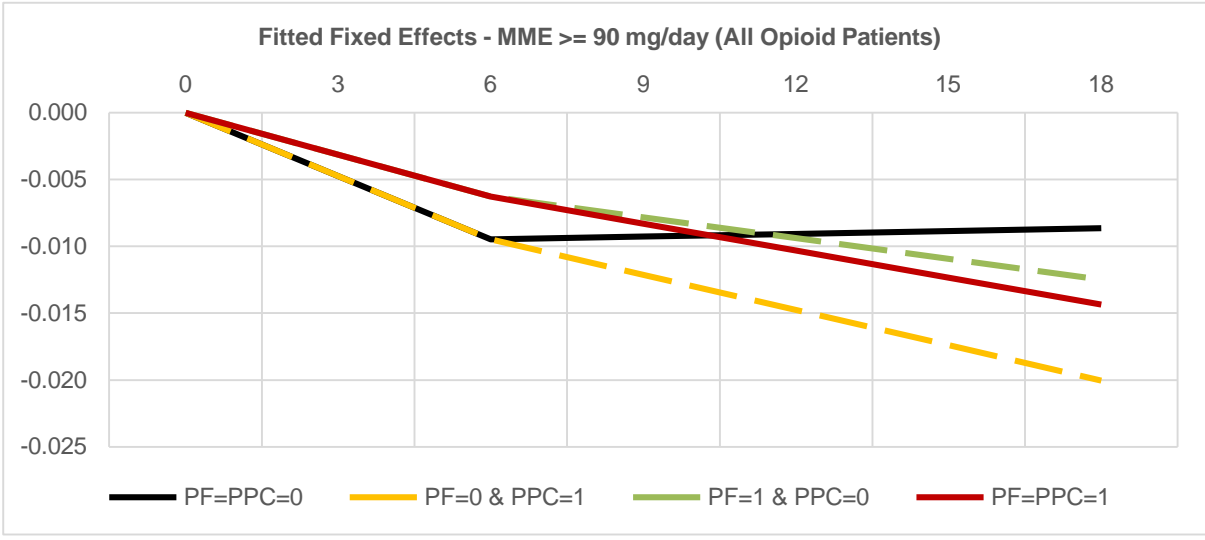

| <b>MME &gt;= 90 mg/day (All Opioid Patients)</b> |                                      |                         |                         |                 |                                        |                                        |                                |
|--------------------------------------------------|--------------------------------------|-------------------------|-------------------------|-----------------|----------------------------------------|----------------------------------------|--------------------------------|
| <b>Study Month</b>                               | <b>Estimated Fixed Effect Curves</b> |                         |                         |                 | <b>Differences</b>                     |                                        |                                |
|                                                  | <b>PF=PPC=0</b>                      | <b>PF=0 &amp; PPC=1</b> | <b>PF=1 &amp; PPC=0</b> | <b>PF=PPC=1</b> | <b>PF=0 &amp; PPC=1 minus PF=PPC=0</b> | <b>PF=1 &amp; PPC=0 minus PF=PPC=0</b> | <b>PF=PPC=1 minus PF=PPC=0</b> |
| 0                                                | 0.000                                | 0.000                   | 0.000                   | 0.000           | 0.000                                  | 0.000                                  | 0.000                          |
| 3                                                | -0.005                               | -0.005                  | -0.003                  | -0.003          | 0.000                                  | 0.002                                  | 0.002                          |
| 6                                                | -0.009                               | -0.009                  | -0.006                  | -0.006          | 0.000                                  | 0.003                                  | 0.003                          |
| 9                                                | -0.009                               | -0.012                  | -0.008                  | -0.008          | -0.003                                 | 0.001                                  | 0.001                          |
| 12                                               | -0.009                               | -0.015                  | -0.009                  | -0.010          | -0.006                                 | 0.000                                  | -0.001                         |
| 15                                               | -0.009                               | -0.017                  | -0.011                  | -0.012          | -0.009                                 | -0.002                                 | -0.003                         |
| 18                                               | -0.009                               | -0.020                  | -0.012                  | -0.014          | -0.011                                 | -0.004                                 | -0.006                         |
| <b>Std Dev of Estimated Values</b>               |                                      |                         |                         |                 |                                        |                                        |                                |
| 0                                                | 0.000                                | 0.000                   | 0.000                   | 0.000           | 0.000                                  | 0.000                                  | 0.000                          |
| 3                                                | 0.002                                | 0.002                   | 0.002                   | 0.002           | 0.000                                  | 0.003                                  | 0.003                          |
| 6                                                | 0.004                                | 0.004                   | 0.004                   | 0.004           | 0.000                                  | 0.006                                  | 0.006                          |
| 9                                                | 0.004                                | 0.004                   | 0.004                   | 0.004           | 0.002                                  | 0.005                                  | 0.005                          |
| 12                                               | 0.004                                | 0.004                   | 0.004                   | 0.004           | 0.004                                  | 0.005                                  | 0.005                          |
| 15                                               | 0.005                                | 0.005                   | 0.004                   | 0.005           | 0.006                                  | 0.006                                  | 0.006                          |
| 18                                               | 0.006                                | 0.006                   | 0.005                   | 0.006           | 0.007                                  | 0.007                                  | 0.008                          |
| <b>t-ratios of Estimated Values</b>              |                                      |                         |                         |                 |                                        |                                        |                                |
| 0                                                |                                      |                         |                         |                 |                                        |                                        |                                |
| 3                                                | -2.23                                | -2.23                   | -1.52                   | -1.52           |                                        | 0.56                                   | 0.56                           |
| 6                                                | -2.23                                | -2.23                   | -1.52                   | -1.52           |                                        | 0.56                                   | 0.56                           |
| 9                                                | -2.39                                | -3.11                   | -2.08                   | -2.19           | -1.53                                  | 0.28                                   | 0.19                           |
| 12                                               | -2.26                                | -3.60                   | -2.41                   | -2.58           | -1.53                                  | -0.06                                  | -0.24                          |
| 15                                               | -1.91                                | -3.62                   | -2.44                   | -2.62           | -1.53                                  | -0.35                                  | -0.56                          |
| 18                                               | -1.55                                | -3.43                   | -2.32                   | -2.52           | -1.53                                  | -0.53                                  | -0.76                          |



| Covariance Parameter Estimates |         |          | Std Dev & Correlation |         |         |
|--------------------------------|---------|----------|-----------------------|---------|---------|
| Cov Parm                       | Subject | Estimate |                       |         |         |
| Intercept                      | Clinic  | 0.0001   | Clinic                | 0.0077  |         |
| UN(1,1)                        | PCP     | 0.0019   |                       |         |         |
| UN(2,1)                        | PCP     | 0.0000   |                       |         |         |
| UN(2,2)                        | PCP     | -        | PCP                   | 0.0431  |         |
| UN(3,1)                        | PCP     | (0.0001) |                       | #DIV/0! | -       |
| UN(3,2)                        | PCP     | 0.0000   |                       | #DIV/0! | #DIV/0! |
| UN(3,3)                        | PCP     | -        |                       |         |         |
| Residual                       |         | 0.0479   | Residual              | 0.2188  |         |

| Solution for Fixed Effects |           |          |                |     |         |         |
|----------------------------|-----------|----------|----------------|-----|---------|---------|
| Effect                     | system    | Estimate | Standard Error | DF  | t Value | Pr >  t |
| system                     | Bellin    | 0.0484   | 0.0059         | 865 | 8.23    | <.0001  |
| system                     | UW Health | 0.1141   | 0.0051         | 865 | 22.42   | <.0001  |
| clinic_size                |           | 0.0000   | 0.0000         | 865 | -Inf    | <.0001  |
| t7                         |           | -0.0016  | 0.0007         | 263 | -2.23   | 0.027   |
| PF_t7                      |           | 0.0005   | 0.0010         | 865 | 0.56    | 0.576   |
| t13                        |           | 0.0017   | 0.0010         | 214 | 1.63    | 0.105   |
| PF_t13                     |           | -0.0011  | 0.0014         | 865 | -0.80   | 0.424   |
| PPC_t13                    |           | -0.0010  | 0.0006         | 865 | -1.53   | 0.125   |
| PFandPPC_t13               |           | 0.0008   | 0.0009         | 865 | 0.92    | 0.360   |

| Estimates                       |          |                |     |         |         |
|---------------------------------|----------|----------------|-----|---------|---------|
| Label                           | Estimate | Standard Error | DF  | t Value | Pr >  t |
| <b>NOINT Chg</b>                | -0.0087  | 0.0056         | 865 | -1.55   | 0.121   |
| <b>PF Only Chg</b>              | -0.0125  | 0.0055         | 865 | -2.28   | 0.023   |
| <b>PPC Only Chg</b>             | -0.0200  | 0.0058         | 865 | -3.43   | 0.001   |
| <b>PF &amp; PPC Chg</b>         | -0.0144  | 0.0058         | 865 | -2.49   | 0.013   |
| <b>PF Only vs NOINT</b>         | -0.0038  | 0.0074         | 865 | -0.52   | 0.603   |
| <b>PPC Only vs NOINT</b>        | -0.0114  | 0.0074         | 865 | -1.53   | 0.125   |
| <b>PF Only vs PPC Only 1</b>    | 0.0076   | 0.0076         | 865 | 1.00    | 0.318   |
| <b>PF Only vs PPC Only 2</b>    | 0.0044   | 0.0083         | 865 | 0.53    | 0.598   |
| <b>PF &amp; PPC Interaction</b> | 0.0095   | 0.0104         | 865 | 0.92    | 0.360   |
| <b>PF &amp; PPC vs NOINT</b>    | -0.0057  | 0.0076         | 865 | -0.75   | 0.454   |

### Studentized Residuals for y

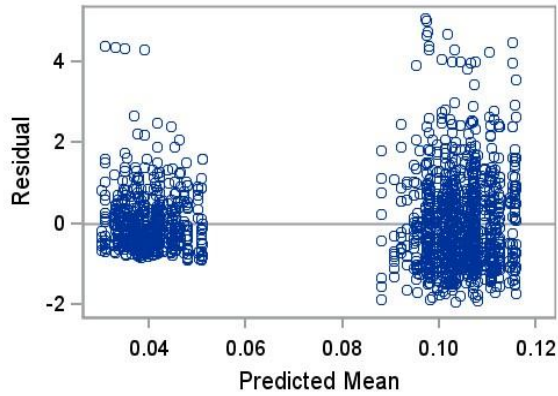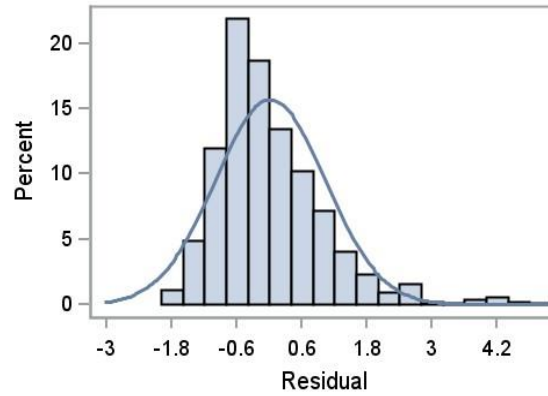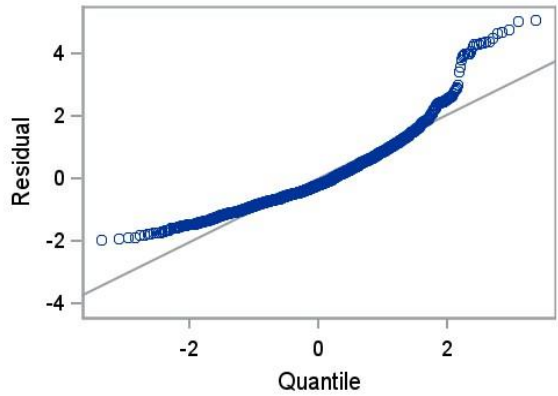

| Residual Statistics |        |
|---------------------|--------|
| Observations        | 1616   |
| Minimum             | -1.944 |
| Mean                | 0.0121 |
| Maximum             | 5.0692 |
| Std Dev             | 1.0177 |

  

| Fit Statistics |       |
|----------------|-------|
| Objective      | -4772 |
| AIC            | -4760 |
| AICC           | -4760 |
| BIC            | -4751 |

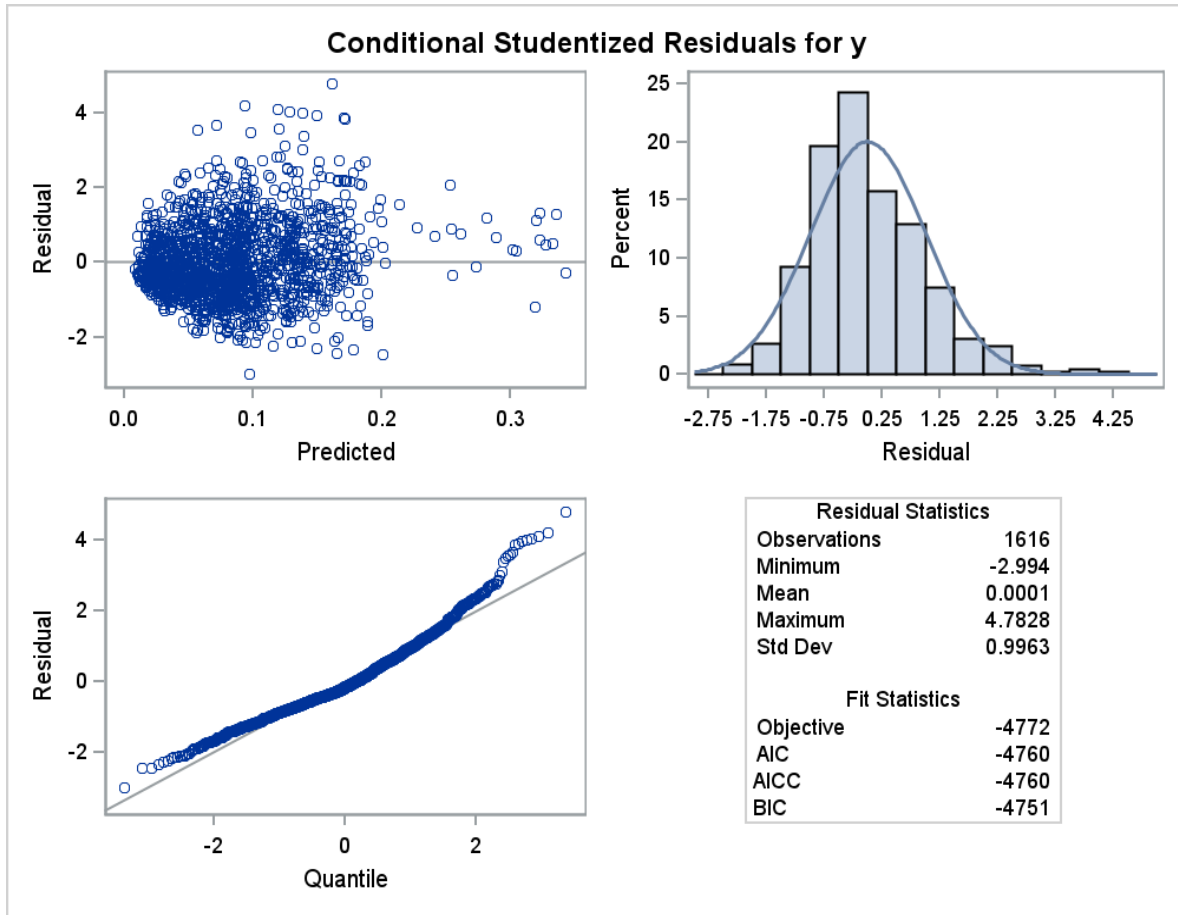

Appendix B3 – Percent of Opioid Patients with Benzo’s in Last 3 Months (All Opioid Patients)

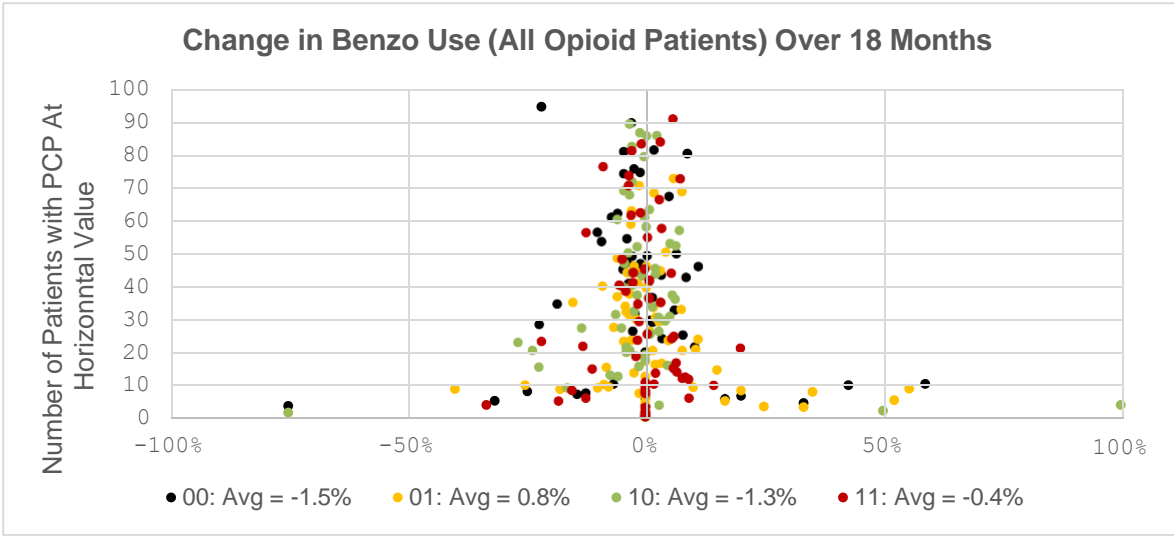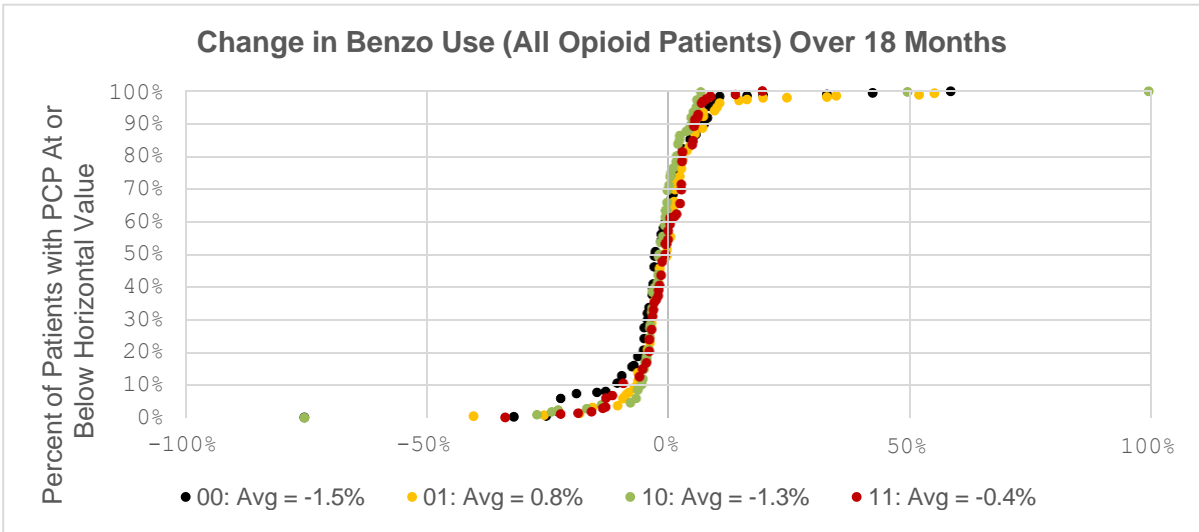

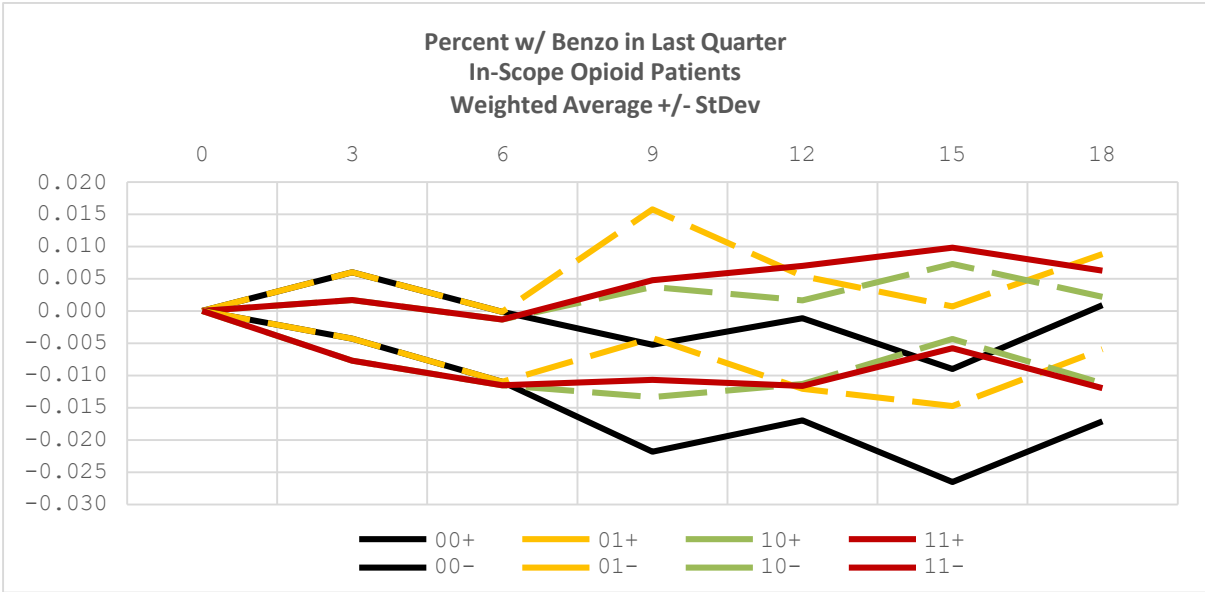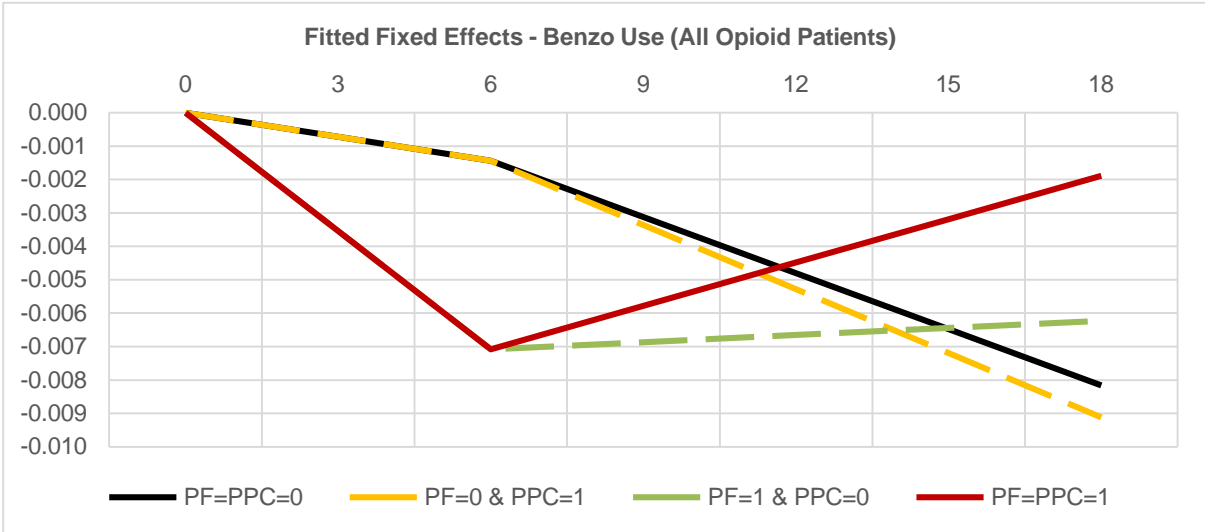

| <b>Benzo Use (All Opioid Patients)</b> |                                      |                         |                         |                 |                                        |                                        |                                |
|----------------------------------------|--------------------------------------|-------------------------|-------------------------|-----------------|----------------------------------------|----------------------------------------|--------------------------------|
| <b>Study Month</b>                     | <b>Estimated Fixed Effect Curves</b> |                         |                         |                 | <b>Differences</b>                     |                                        |                                |
|                                        | <b>PF=PPC=0</b>                      | <b>PF=0 &amp; PPC=1</b> | <b>PF=1 &amp; PPC=0</b> | <b>PF=PPC=1</b> | <b>PF=0 &amp; PPC=1 minus PF=PPC=0</b> | <b>PF=1 &amp; PPC=0 minus PF=PPC=0</b> | <b>PF=PPC=1 minus PF=PPC=0</b> |
| 0                                      | 0.000                                | 0.000                   | 0.000                   | 0.000           | 0.000                                  | 0.000                                  | 0.000                          |
| 3                                      | -0.001                               | -0.001                  | -0.004                  | -0.004          | 0.000                                  | -0.003                                 | -0.003                         |
| 6                                      | -0.001                               | -0.001                  | -0.007                  | -0.007          | 0.000                                  | -0.006                                 | -0.006                         |
| 9                                      | -0.003                               | -0.003                  | -0.007                  | -0.006          | 0.000                                  | -0.004                                 | -0.003                         |
| 12                                     | -0.005                               | -0.005                  | -0.007                  | -0.004          | 0.000                                  | -0.002                                 | 0.000                          |
| 15                                     | -0.006                               | -0.007                  | -0.006                  | -0.003          | -0.001                                 | 0.000                                  | 0.003                          |
| 18                                     | -0.008                               | -0.009                  | -0.006                  | -0.002          | -0.001                                 | 0.002                                  | 0.006                          |
| <b>Std Dev of Estimated Values</b>     |                                      |                         |                         |                 |                                        |                                        |                                |
| 0                                      | 0.000                                | 0.000                   | 0.000                   | 0.000           | 0.000                                  | 0.000                                  | 0.000                          |
| 3                                      | 0.002                                | 0.002                   | 0.002                   | 0.002           | 0.000                                  | 0.003                                  | 0.003                          |
| 6                                      | 0.005                                | 0.005                   | 0.005                   | 0.005           | 0.000                                  | 0.006                                  | 0.006                          |
| 9                                      | 0.004                                | 0.004                   | 0.004                   | 0.004           | 0.002                                  | 0.006                                  | 0.006                          |
| 12                                     | 0.005                                | 0.005                   | 0.004                   | 0.005           | 0.004                                  | 0.006                                  | 0.006                          |
| 15                                     | 0.005                                | 0.005                   | 0.005                   | 0.005           | 0.006                                  | 0.007                                  | 0.007                          |
| 18                                     | 0.006                                | 0.007                   | 0.006                   | 0.006           | 0.008                                  | 0.008                                  | 0.009                          |
| <b>t-ratios of Estimated Values</b>    |                                      |                         |                         |                 |                                        |                                        |                                |
| 0                                      |                                      |                         |                         |                 |                                        |                                        |                                |
| 3                                      | -0.30                                | -0.30                   | -1.49                   | -1.49           |                                        | -0.89                                  | -0.89                          |
| 6                                      | -0.30                                | -0.30                   | -1.49                   | -1.49           |                                        | -0.89                                  | -0.89                          |
| 9                                      | -0.71                                | -0.76                   | -1.59                   | -1.33           | -0.11                                  | -0.66                                  | -0.47                          |
| 12                                     | -1.06                                | -1.14                   | -1.50                   | -0.99           | -0.11                                  | -0.31                                  | 0.05                           |
| 15                                     | -1.26                                | -1.33                   | -1.27                   | -0.61           | -0.11                                  | 0.01                                   | 0.47                           |
| 18                                     | -1.33                                | -1.40                   | -1.03                   | -0.30           | -0.11                                  | 0.23                                   | 0.74                           |

| Covariance Parameter Estimates |         |          | Std Dev & Correlation |        |        |
|--------------------------------|---------|----------|-----------------------|--------|--------|
| Cov Parm                       | Subject | Estimate |                       |        |        |
| Intercept                      | Clinic  | 0.0001   | 0.0097                |        |        |
| UN(1,1)                        | PCP     | 0.0022   |                       |        |        |
| UN(2,1)                        | PCP     | (0.0001) |                       |        |        |
| UN(2,2)                        | PCP     | 0.0000   | 0.0469                |        |        |
| UN(3,1)                        | PCP     | 0.0001   | -36.9%                | 0.0035 |        |
| UN(3,2)                        | PCP     | (0.0000) | 40.5%                 | -64.5% | 0.0045 |
| UN(3,3)                        | PCP     | 0.0000   |                       |        |        |
| Residual                       |         | 0.0564   | 0.2375                |        |        |

| Solution for Fixed Effects |           |          |                |     |         |         |
|----------------------------|-----------|----------|----------------|-----|---------|---------|
| Effect                     | system    | Estimate | Standard Error | DF  | t Value | Pr >  t |
| system                     | Bellin    | 0.0771   | 0.0066         | 866 | 11.68   | <.0001  |
| system                     | UW Health | 0.1036   | 0.0057         | 866 | 18.06   | <.0001  |
| clinic_size                |           | 0.0000   | 0.0000         | 866 | Infty   | <.0001  |
| t7                         |           | -0.0002  | 0.0008         | 263 | -0.30   | 0.766   |
| PF_t7                      |           | -0.0009  | 0.0011         | 866 | -0.89   | 0.373   |
| t13                        |           | -0.0003  | 0.0011         | 214 | -0.28   | 0.780   |
| PF_t13                     |           | 0.0016   | 0.0015         | 866 | 1.03    | 0.305   |
| PPC_t13                    |           | -0.0001  | 0.0007         | 866 | -0.11   | 0.914   |
| PFandPPC_t13               |           | 0.0004   | 0.0010         | 866 | 0.45    | 0.652   |



| Estimates                       |          |                |     |         |         |
|---------------------------------|----------|----------------|-----|---------|---------|
| Label                           | Estimate | Standard Error | DF  | t Value | Pr >  t |
| <b>NOINT Chg</b>                | -0.0082  | 0.0061         | 866 | -1.34   | 0.181   |
| <b>PF Only Chg</b>              | -0.0062  | 0.0061         | 866 | -1.03   | 0.305   |
| <b>PPC Only Chg</b>             | -0.0091  | 0.0065         | 866 | -1.40   | 0.163   |
| <b>PF &amp; PPC Chg</b>         | -0.0018  | 0.0063         | 866 | -0.29   | 0.772   |
| <b>PF Only vs NOINT</b>         | 0.0020   | 0.0084         | 866 | 0.23    | 0.816   |
| <b>PPC Only vs NOINT</b>        | -0.0009  | 0.0084         | 866 | -0.11   | 0.914   |
| <b>PF Only vs PPC Only 1</b>    | 0.0029   | 0.0087         | 866 | 0.33    | 0.742   |
| <b>PF Only vs PPC Only 2</b>    | 0.0085   | 0.0092         | 866 | 0.92    | 0.358   |
| <b>PF &amp; PPC Interaction</b> | 0.0053   | 0.0118         | 866 | 0.45    | 0.652   |
| <b>PF &amp; PPC vs NOINT</b>    | 0.0063   | 0.0086         | 866 | 0.74    | 0.461   |

### Studentized Residuals for y

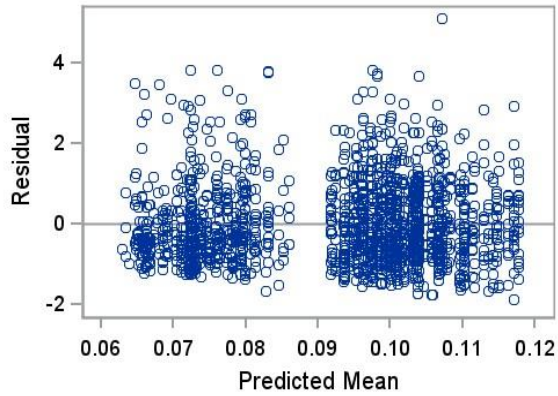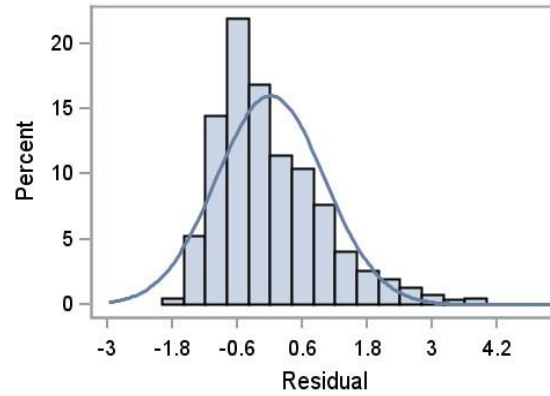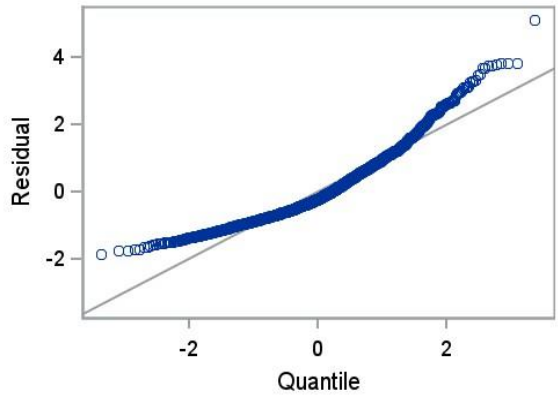

| Residual Statistics |        |
|---------------------|--------|
| Observations        | 1617   |
| Minimum             | -1.871 |
| Mean                | 0.0085 |
| Maximum             | 5.1147 |
| Std Dev             | 0.9988 |

  

| Fit Statistics |       |
|----------------|-------|
| Objective      | -4549 |
| AIC            | -4533 |
| AICC           | -4533 |
| BIC            | -4521 |

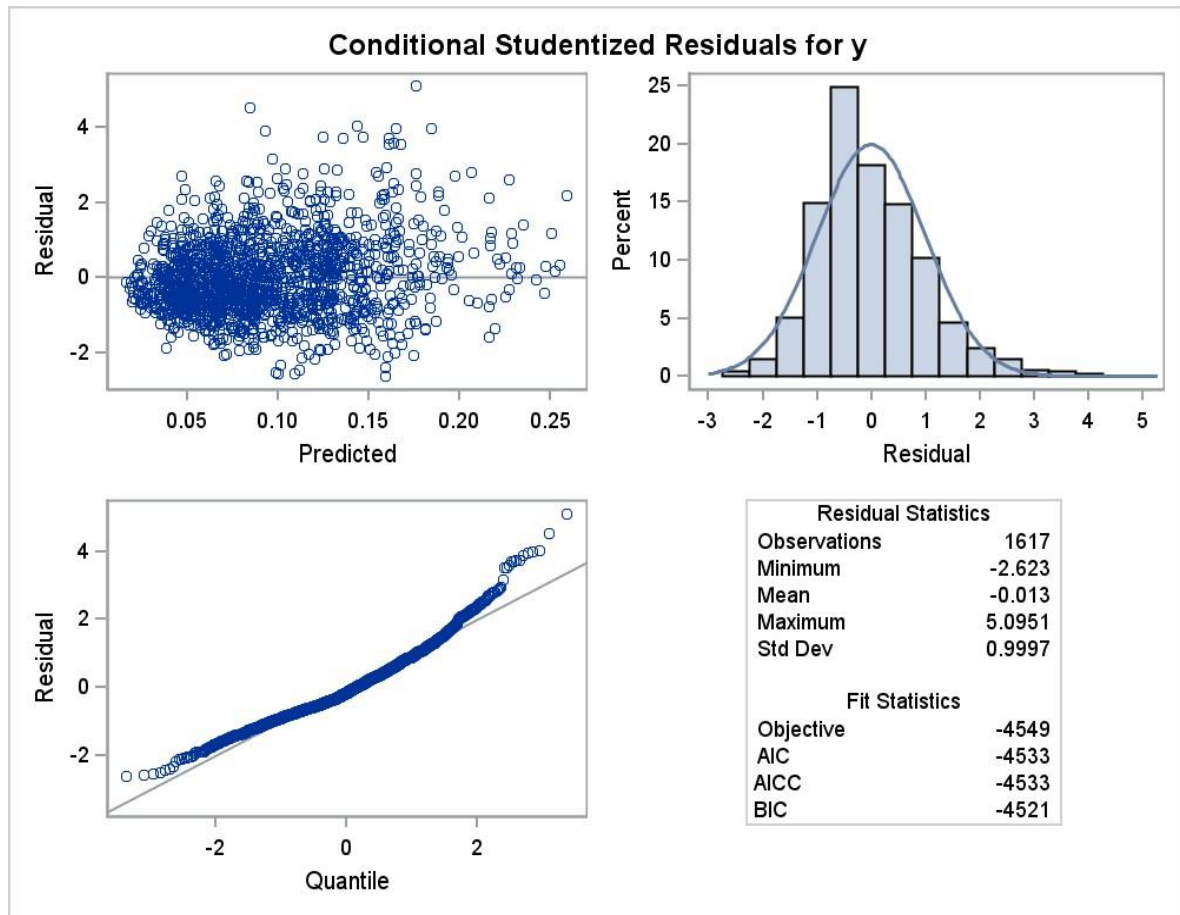

Appendix B4 – Percent of Opioid Patients with Urine Drug Screen in Last 12 Months (All opioid Patients)

Change in Urine Screening (All Opioid Patients) Over 18 Months

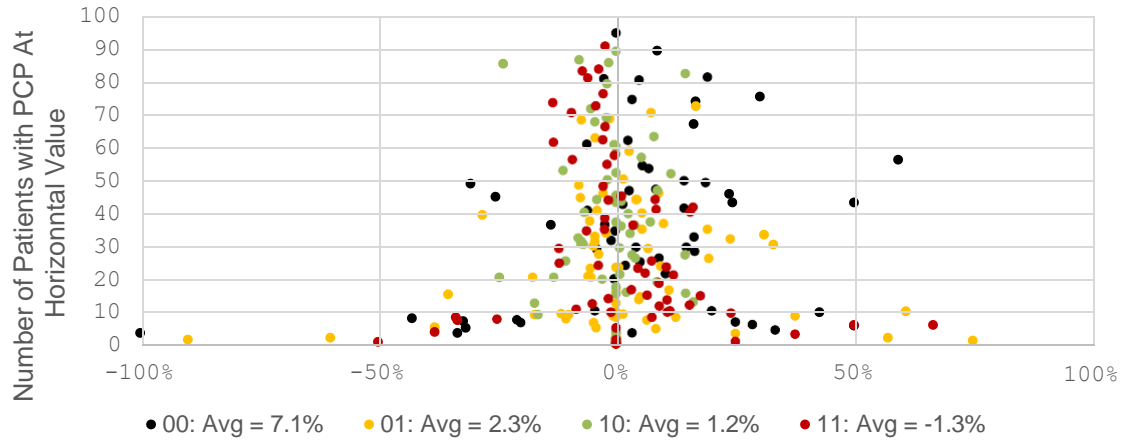

Change in Urine Screening (All Opioid Patients) Over 18 Months

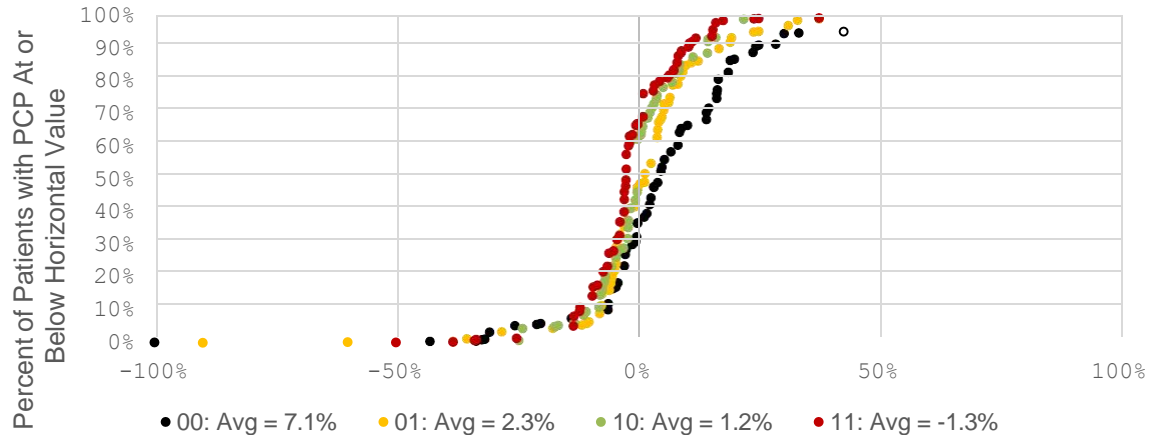

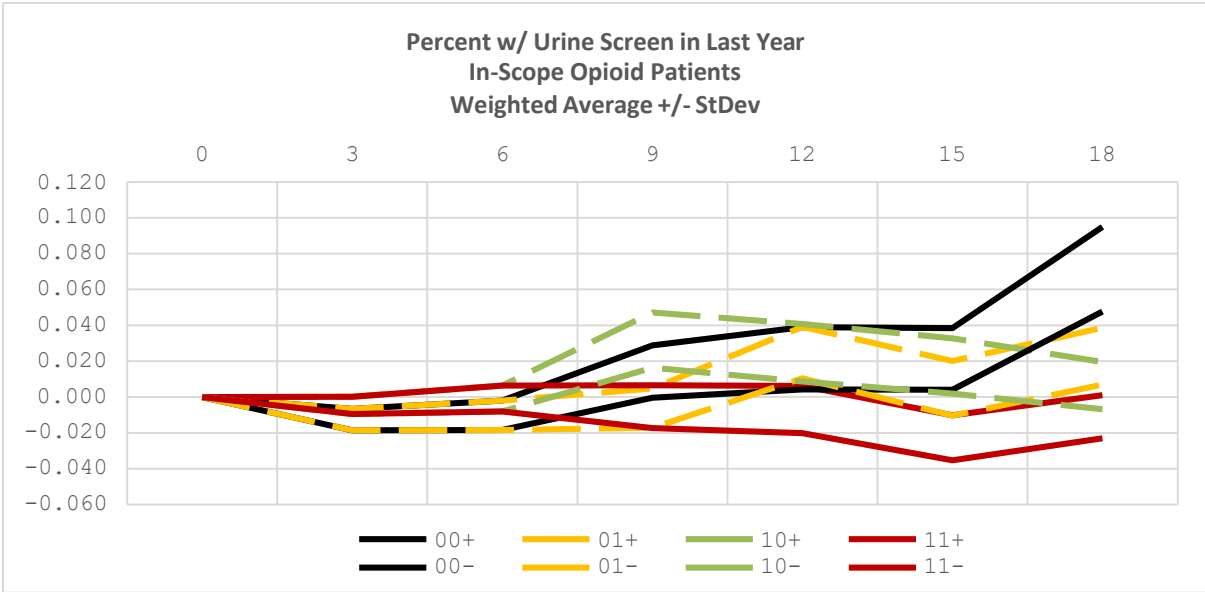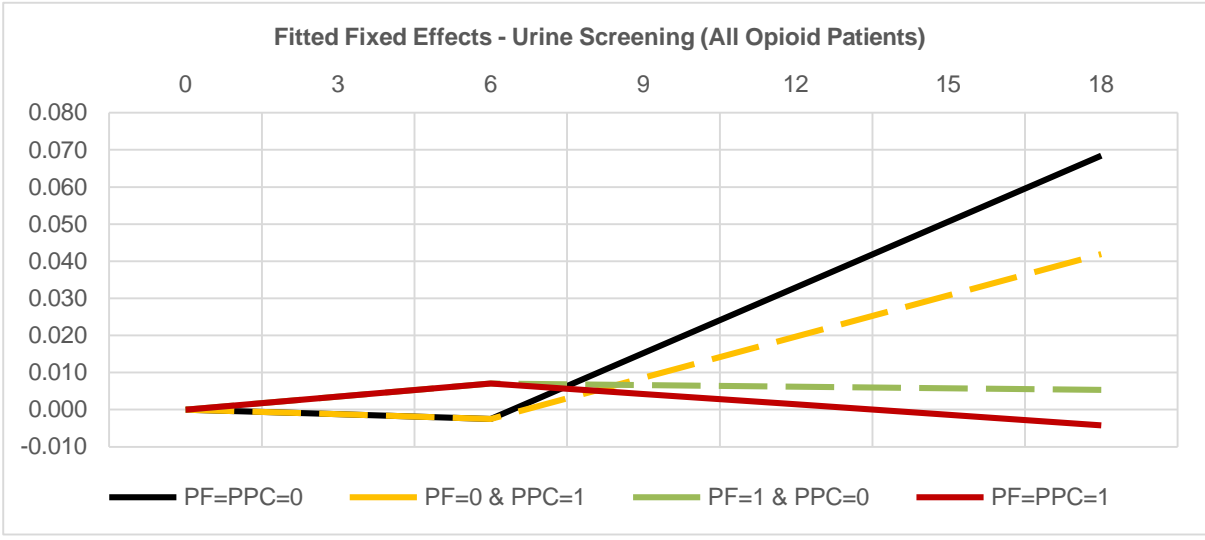

| Urine Screening (All Opioid Patients) |                               |              |              |          |                             |                             |                         |
|---------------------------------------|-------------------------------|--------------|--------------|----------|-----------------------------|-----------------------------|-------------------------|
| Study Month                           | Estimated Fixed Effect Curves |              |              |          | Differences                 |                             |                         |
|                                       | PF=PPC=0                      | PF=0 & PPC=1 | PF=1 & PPC=0 | PF=PPC=1 | PF=0 & PPC=1 minus PF=PPC=0 | PF=1 & PPC=0 minus PF=PPC=0 | PF=PPC=1 minus PF=PPC=0 |
| 0                                     | 0.000                         | 0.000        | 0.000        | 0.000    | 0.000                       | 0.000                       | 0.000                   |
| 3                                     | -0.001                        | -0.001       | 0.004        | 0.004    | 0.000                       | 0.005                       | 0.005                   |
| 6                                     | -0.002                        | -0.002       | 0.007        | 0.007    | 0.000                       | 0.010                       | 0.010                   |
| 9                                     | 0.015                         | 0.009        | 0.007        | 0.004    | -0.007                      | -0.009                      | -0.011                  |
| 12                                    | 0.033                         | 0.020        | 0.006        | 0.001    | -0.013                      | -0.027                      | -0.032                  |
| 15                                    | 0.051                         | 0.031        | 0.006        | -0.001   | -0.020                      | -0.045                      | -0.052                  |
| 18                                    | 0.068                         | 0.042        | 0.005        | -0.004   | -0.027                      | -0.063                      | -0.073                  |
| Std Dev of Estimated Values           |                               |              |              |          |                             |                             |                         |
| 0                                     | 0.000                         | 0.000        | 0.000        | 0.000    | 0.000                       | 0.000                       | 0.000                   |
| 3                                     | 0.004                         | 0.004        | 0.004        | 0.004    | 0.000                       | 0.006                       | 0.006                   |
| 6                                     | 0.009                         | 0.009        | 0.009        | 0.009    | 0.000                       | 0.012                       | 0.012                   |
| 9                                     | 0.009                         | 0.009        | 0.009        | 0.009    | 0.005                       | 0.012                       | 0.012                   |
| 12                                    | 0.010                         | 0.010        | 0.010        | 0.010    | 0.010                       | 0.014                       | 0.014                   |
| 15                                    | 0.013                         | 0.012        | 0.013        | 0.013    | 0.015                       | 0.018                       | 0.018                   |
| 18                                    | 0.016                         | 0.015        | 0.015        | 0.015    | 0.020                       | 0.022                       | 0.022                   |
| t-ratios of Estimated Values          |                               |              |              |          |                             |                             |                         |
| 0                                     |                               |              |              |          |                             |                             |                         |
| 3                                     | -0.29                         | -0.29        | 0.83         | 0.83     |                             | 0.80                        | 0.80                    |
| 6                                     | -0.29                         | -0.29        | 0.83         | 0.83     |                             | 0.80                        | 0.80                    |
| 9                                     | 1.74                          | 0.99         | 0.76         | 0.49     | -1.33                       | -0.71                       | -0.91                   |
| 12                                    | 3.21                          | 1.95         | 0.61         | 0.14     | -1.33                       | -1.87                       | -2.21                   |
| 15                                    | 4.00                          | 2.48         | 0.46         | -0.11    | -1.33                       | -2.54                       | -2.95                   |
| 18                                    | 4.41                          | 2.75         | 0.35         | -0.27    | -1.33                       | -2.91                       | -3.35                   |

| Covariance Parameter Estimates |         |          | Std Dev & Correlation |        |        |
|--------------------------------|---------|----------|-----------------------|--------|--------|
| Cov Parm                       | Subject | Estimate |                       |        |        |
| Intercept                      | Clinic  | 0.0049   | Clinic                | 0.0697 |        |
| UN(1,1)                        | PCP     | 0.0113   |                       |        |        |
| UN(2,1)                        | PCP     | (0.0005) |                       |        |        |
| UN(2,2)                        | PCP     | 0.0001   | PCP                   | 0.1063 |        |
| UN(3,1)                        | PCP     | 0.0003   |                       | -44.4% | 0.0108 |
| UN(3,2)                        | PCP     | (0.0001) |                       | 24.3%  | -85.6% |
| UN(3,3)                        | PCP     | 0.0002   |                       |        | 0.0130 |
| Residual                       |         | 0.0817   | Residual              | 0.2858 |        |

| Solution for Fixed Effects |           |          |                |     |         |         |
|----------------------------|-----------|----------|----------------|-----|---------|---------|
| Effect                     | system    | Estimate | Standard Error | DF  | t Value | Pr >  t |
| system                     | Bellin    | 0.1134   | 0.0221         | 866 | 5.14    | <.0001  |
| system                     | UW Health | 0.1854   | 0.0224         | 866 | 8.28    | <.0001  |
| clinic_size                |           | 0.0000   | 0.0000         | 866 | -1.59   | 0.113   |
| t7                         |           | -0.0004  | 0.0014         | 263 | -0.28   | 0.776   |
| PF_t7                      |           | 0.0016   | 0.0020         | 866 | 0.80    | 0.426   |
| t13                        |           | 0.0063   | 0.0020         | 214 | 3.13    | 0.002   |
| PF_t13                     |           | -0.0076  | 0.0028         | 866 | -2.71   | 0.007   |
| PPC_t13                    |           | -0.0022  | 0.0017         | 866 | -1.33   | 0.183   |
| PFandPPC_t13               |           | 0.0014   | 0.0024         | 866 | 0.60    | 0.546   |

| Estimates                       |          |                |     |         |         |
|---------------------------------|----------|----------------|-----|---------|---------|
| Label                           | Estimate | Standard Error | DF  | t Value | Pr >  t |
| <b>NOINT Chg</b>                | 0.0684   | 0.0155         | 866 | 4.41    | <.0001  |
| <b>PF Only Chg</b>              | 0.0053   | 0.0154         | 866 | 0.34    | 0.732   |
| <b>PPC Only Chg</b>             | 0.0419   | 0.0152         | 866 | 2.75    | 0.006   |
| <b>PF &amp; PPC Chg</b>         | -0.0042  | 0.0154         | 866 | -0.27   | 0.784   |
| <b>PF Only vs NOINT</b>         | -0.0632  | 0.0217         | 866 | -2.91   | 0.004   |
| <b>PPC Only vs NOINT</b>        | -0.0265  | 0.0199         | 866 | -1.33   | 0.183   |
| <b>PF Only vs PPC Only 1</b>    | -0.0366  | 0.0215         | 866 | -1.70   | 0.089   |
| <b>PF Only vs PPC Only 2</b>    | -0.0461  | 0.0202         | 866 | -2.28   | 0.023   |
| <b>PF &amp; PPC Interaction</b> | 0.0170   | 0.0282         | 866 | 0.60    | 0.546   |
| <b>PF &amp; PPC vs NOINT</b>    | -0.0727  | 0.0217         | 866 | -3.35   | 0.001   |



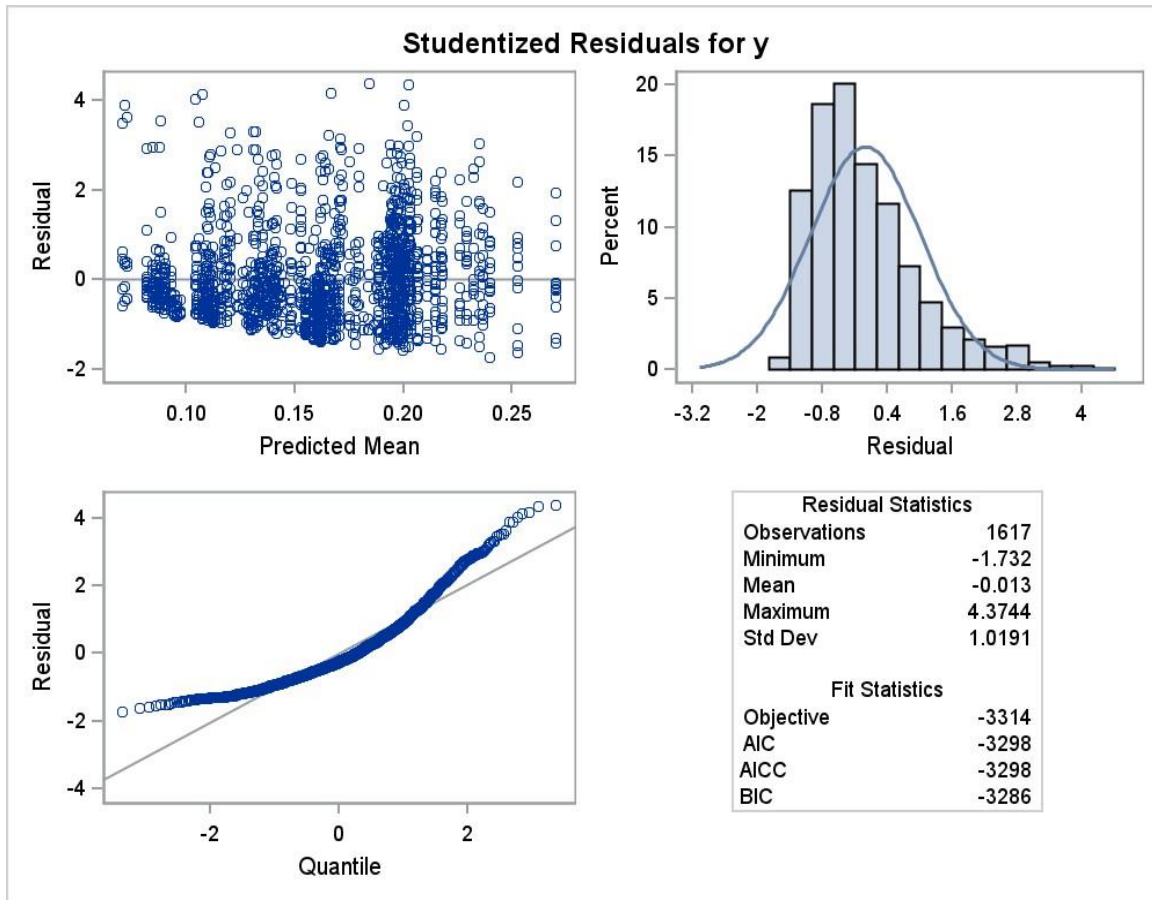

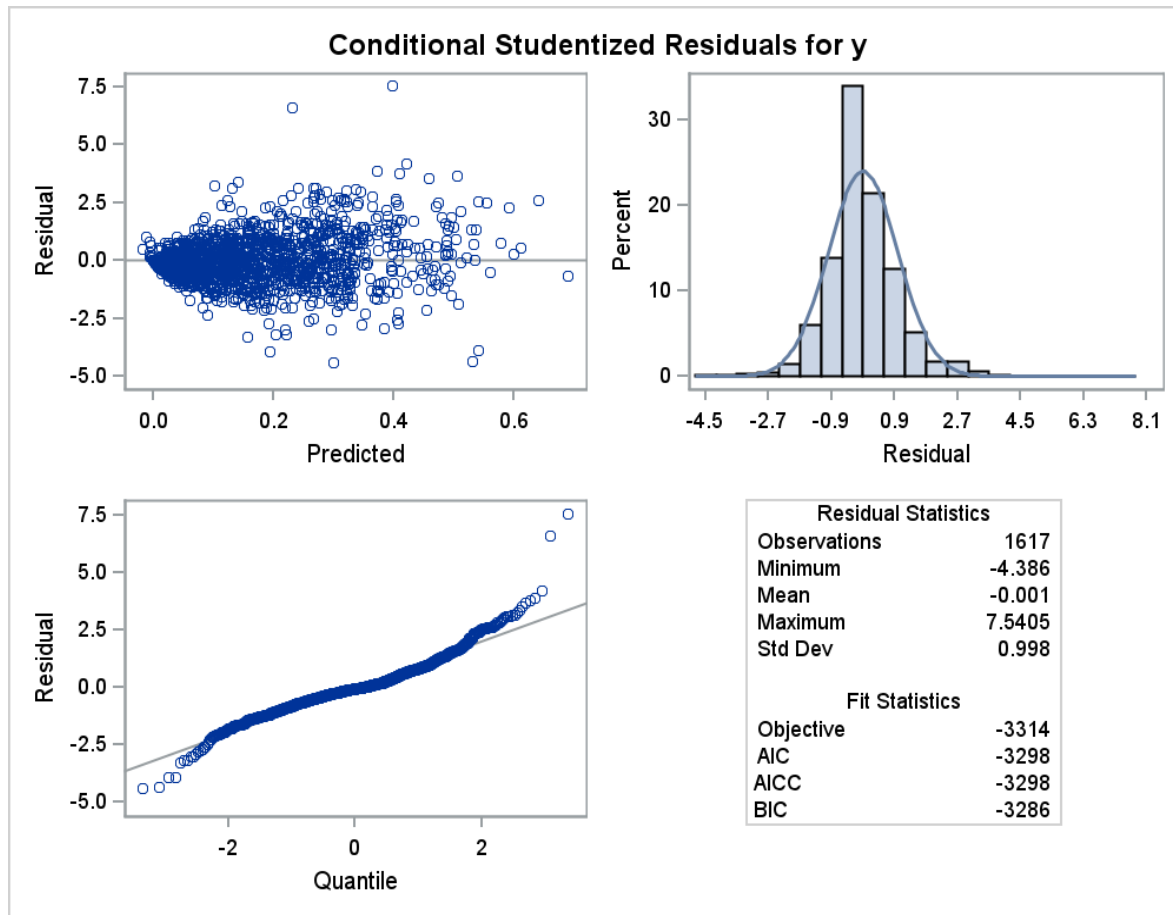

Appendix B5 – Percent of Opioid Patients with Treatment Agreement in Last 12 Months (All Opioid Patients)

**Change in Treatment Agreements (All Opioid Patients) Over 18 Months**

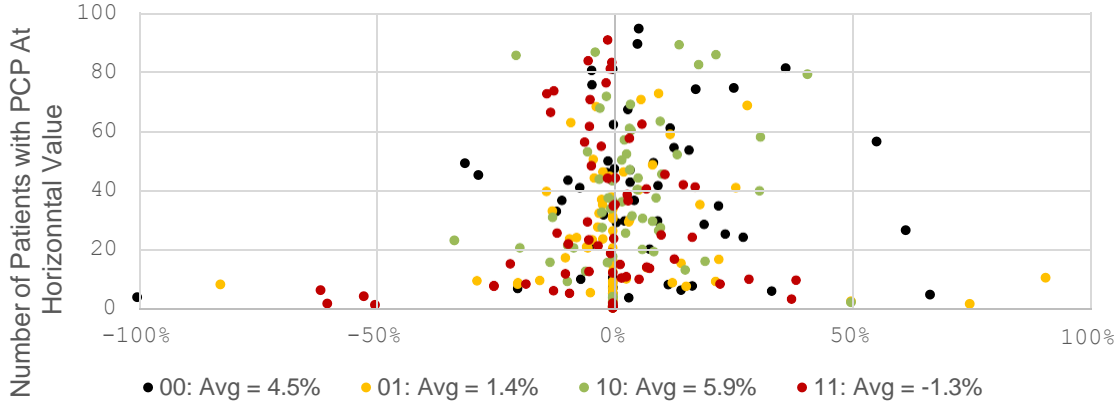

**Change in Treatment Agreements (All Opioid Patients) Over 18 Months**

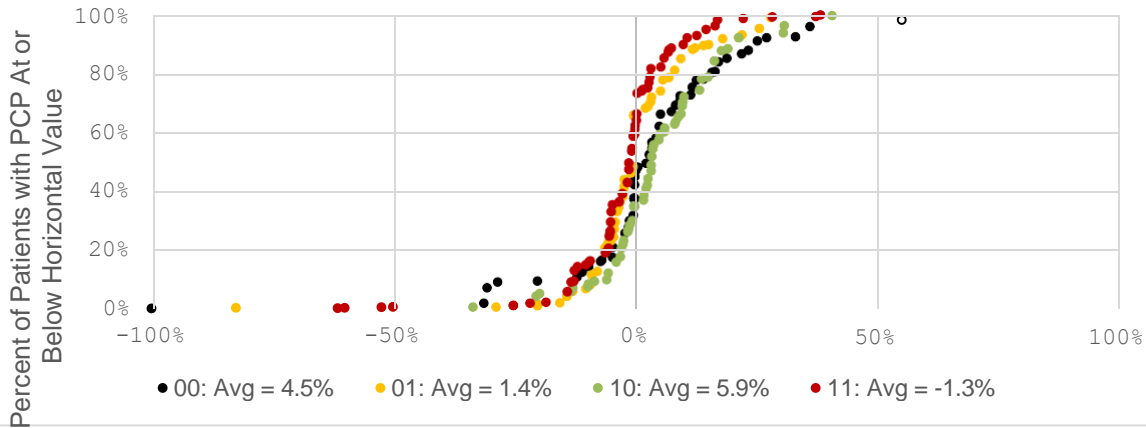

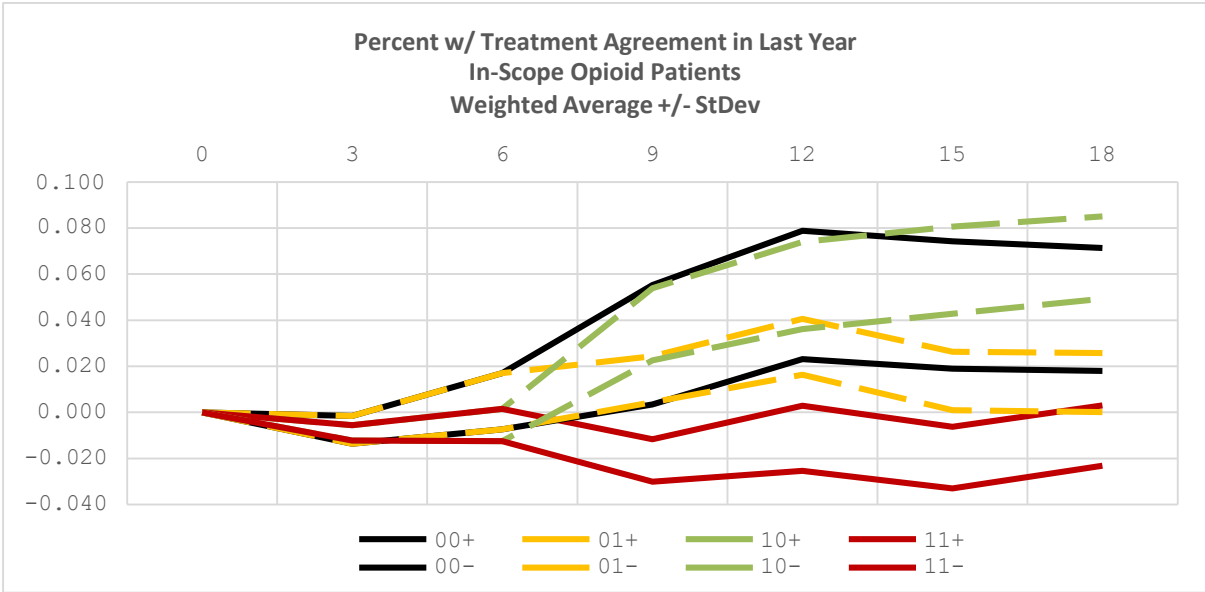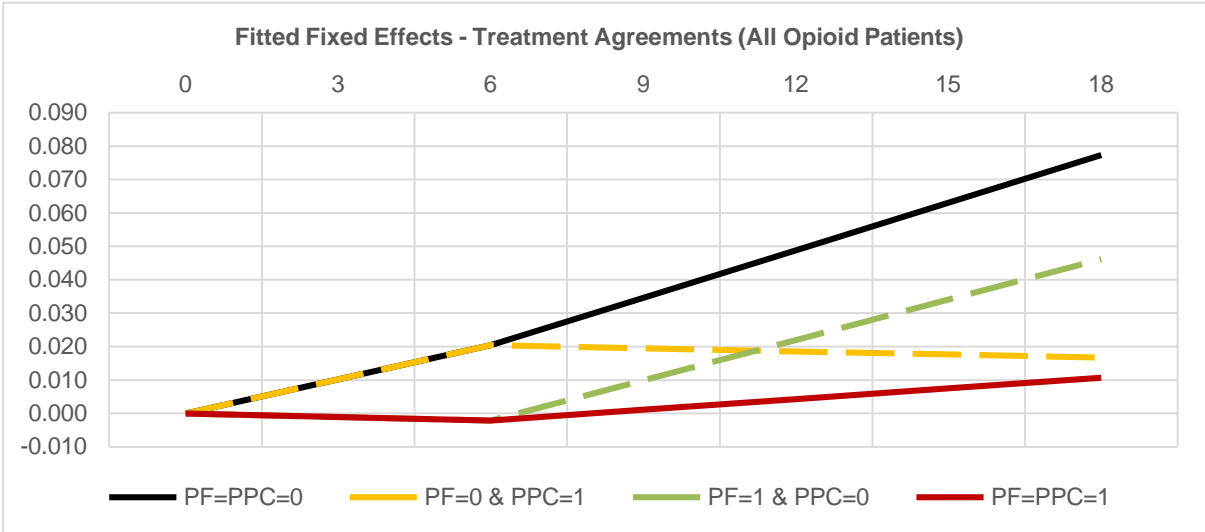

| Treatment Agreements (All Opioid Patients) |                               |              |              |          |                             |                             |                         |
|--------------------------------------------|-------------------------------|--------------|--------------|----------|-----------------------------|-----------------------------|-------------------------|
| Study Month                                | Estimated Fixed Effect Curves |              |              |          | Differences                 |                             |                         |
|                                            | PF=PPC=0                      | PF=0 & PPC=1 | PF=1 & PPC=0 | PF=PPC=1 | PF=0 & PPC=1 minus PF=PPC=0 | PF=1 & PPC=0 minus PF=PPC=0 | PF=PPC=1 minus PF=PPC=0 |
| 0                                          | 0.000                         | 0.000        | 0.000        | 0.000    | 0.000                       | 0.000                       | 0.000                   |
| 3                                          | 0.010                         | 0.010        | -0.001       | -0.001   | 0.000                       | -0.011                      | -0.011                  |
| 6                                          | 0.020                         | 0.020        | -0.002       | -0.002   | 0.000                       | -0.023                      | -0.023                  |
| 9                                          | 0.035                         | 0.019        | 0.010        | 0.001    | -0.015                      | -0.025                      | -0.034                  |
| 12                                         | 0.049                         | 0.019        | 0.022        | 0.004    | -0.030                      | -0.027                      | -0.045                  |
| 15                                         | 0.063                         | 0.018        | 0.034        | 0.007    | -0.045                      | -0.029                      | -0.056                  |
| 18                                         | 0.077                         | 0.017        | 0.046        | 0.011    | -0.061                      | -0.031                      | -0.067                  |
| Std Dev of Estimated Values                |                               |              |              |          |                             |                             |                         |
| 0                                          | 0.000                         | 0.000        | 0.000        | 0.000    | 0.000                       | 0.000                       | 0.000                   |
| 3                                          | 0.005                         | 0.005        | 0.005        | 0.005    | 0.000                       | 0.007                       | 0.007                   |
| 6                                          | 0.010                         | 0.010        | 0.010        | 0.010    | 0.000                       | 0.014                       | 0.014                   |
| 9                                          | 0.010                         | 0.010        | 0.010        | 0.010    | 0.005                       | 0.014                       | 0.014                   |
| 12                                         | 0.012                         | 0.012        | 0.012        | 0.012    | 0.010                       | 0.016                       | 0.016                   |
| 15                                         | 0.014                         | 0.014        | 0.014        | 0.014    | 0.015                       | 0.019                       | 0.019                   |
| 18                                         | 0.016                         | 0.016        | 0.016        | 0.016    | 0.019                       | 0.022                       | 0.022                   |
| t-ratios of Estimated Values               |                               |              |              |          |                             |                             |                         |
| 0                                          |                               |              |              |          |                             |                             |                         |
| 3                                          | 2.00                          | 2.00         | -0.21        | -0.21    |                             | -1.63                       | -1.63                   |
| 6                                          | 2.00                          | 2.00         | -0.21        | -0.21    |                             | -1.63                       | -1.63                   |
| 9                                          | 3.32                          | 1.88         | 0.95         | 0.10     | -3.13                       | -1.75                       | -2.39                   |
| 12                                         | 4.16                          | 1.61         | 1.87         | 0.37     | -3.13                       | -1.69                       | -2.81                   |
| 15                                         | 4.57                          | 1.30         | 2.46         | 0.55     | -3.13                       | -1.54                       | -2.96                   |
| 18                                         | 4.73                          | 1.04         | 2.82         | 0.66     | -3.13                       | -1.39                       | -2.97                   |

| Covariance Parameter Estimates |         |          | Std Dev & Correlation |        |        |
|--------------------------------|---------|----------|-----------------------|--------|--------|
| Cov Parm                       | Subject | Estimate |                       |        |        |
| Intercept                      | Clinic  | 0.0016   | Clinic                | 0.0403 |        |
| UN(1,1)                        | PCP     | 0.0073   |                       |        |        |
| UN(2,1)                        | PCP     | (0.0008) |                       |        |        |
| UN(2,2)                        | PCP     | 0.0003   | PCP                   | 0.0857 |        |
| UN(3,1)                        | PCP     | 0.0006   |                       | -56.8% | 0.0160 |
| UN(3,2)                        | PCP     | (0.0003) |                       | 41.5%  | -90.8% |
| UN(3,3)                        | PCP     | 0.0003   |                       |        | 0.0172 |
| Residual                       |         | 0.0623   | Residual              | 0.2496 |        |

| Solution for Fixed Effects |           |          |                |     |         |         |
|----------------------------|-----------|----------|----------------|-----|---------|---------|
| Effect                     | system    | Estimate | Standard Error | DF  | t Value | Pr >  t |
| system                     | Bellin    | 0.1405   | 0.0144         | 866 | 9.77    | <.0001  |
| system                     | UW Health | 0.0631   | 0.0141         | 866 | 4.47    | <.0001  |
| clinic_size                |           | 0.0000   | 0.0000         | 866 | -0.39   | 0.697   |
| t7                         |           | 0.0034   | 0.0017         | 263 | 2.00    | 0.047   |
| PF_t7                      |           | -0.0038  | 0.0023         | 866 | -1.63   | 0.104   |
| t13                        |           | 0.0013   | 0.0022         | 214 | 0.62    | 0.533   |
| PF_t13                     |           | 0.0030   | 0.0030         | 866 | 1.02    | 0.308   |
| PPC_t13                    |           | -0.0051  | 0.0016         | 866 | -3.13   | 0.002   |
| PFandPPC_t13               |           | 0.0021   | 0.0023         | 866 | 0.92    | 0.358   |

| Estimates                       |          |                |     |         |         |
|---------------------------------|----------|----------------|-----|---------|---------|
| Label                           | Estimate | Standard Error | DF  | t Value | Pr >  t |
| <b>NOINT Chg</b>                | 0.0773   | 0.0164         | 866 | 4.72    | <.0001  |
| <b>PF Only Chg</b>              | 0.0462   | 0.0164         | 866 | 2.82    | 0.005   |
| <b>PPC Only Chg</b>             | 0.0168   | 0.0161         | 866 | 1.04    | 0.297   |
| <b>PF &amp; PPC Chg</b>         | 0.0107   | 0.0162         | 866 | 0.66    | 0.509   |
| <b>PF Only vs NOINT</b>         | -0.0312  | 0.0225         | 866 | -1.38   | 0.167   |
| <b>PPC Only vs NOINT</b>        | -0.0606  | 0.0194         | 866 | -3.13   | 0.002   |
| <b>PF Only vs PPC Only 1</b>    | 0.0294   | 0.0223         | 866 | 1.32    | 0.188   |
| <b>PF Only vs PPC Only 2</b>    | 0.0520   | 0.0195         | 866 | 2.67    | 0.008   |
| <b>PF &amp; PPC Interaction</b> | 0.0252   | 0.0274         | 866 | 0.92    | 0.358   |
| <b>PF &amp; PPC vs NOINT</b>    | -0.0666  | 0.0225         | 866 | -2.97   | 0.003   |

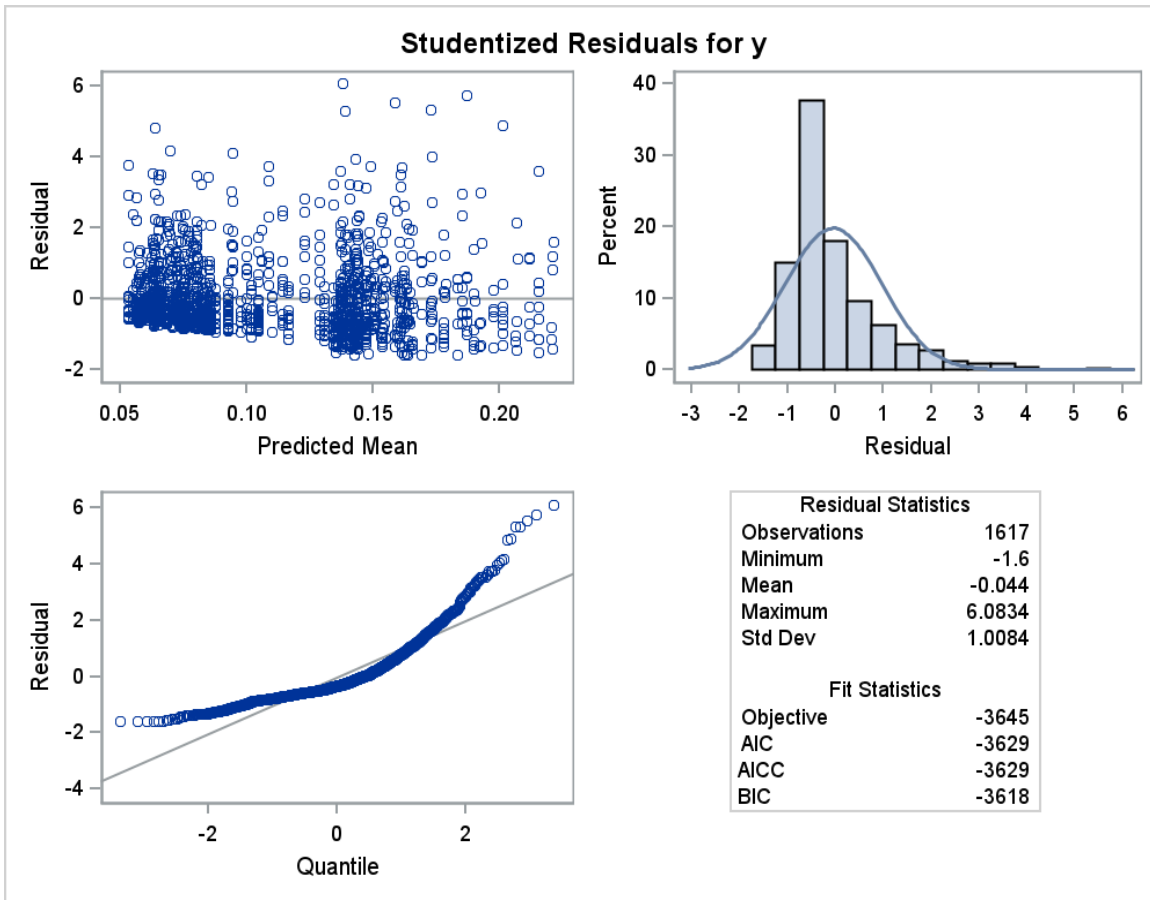



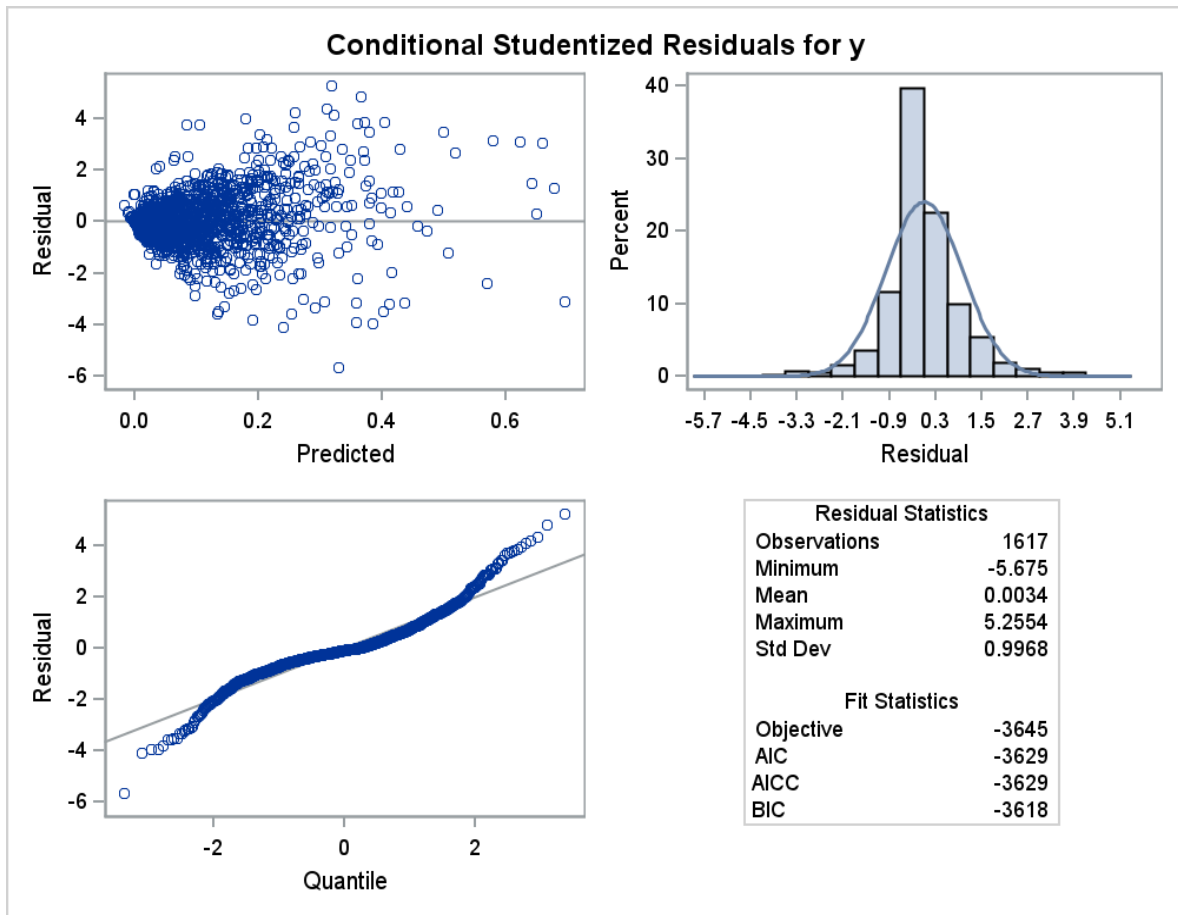

Appendix B6 – Percent of Opioid Patients with PHQ-9 Depression Screen in Last 12 Months (All Opioid Patients)

### Change in PHQ-9 Screening (All Opioid Patients) Over 18 Months

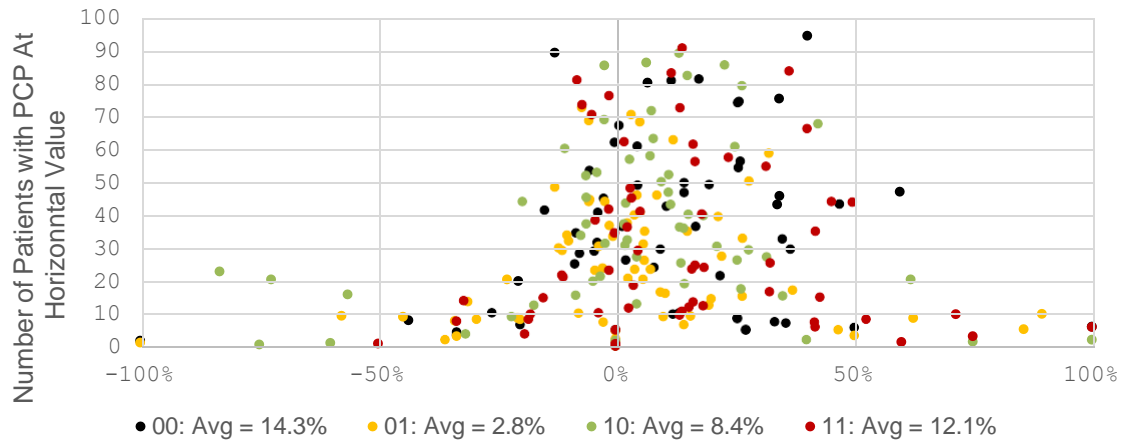

### Change in PHQ-9 Screening (All Opioid Patients) Over 18 Months

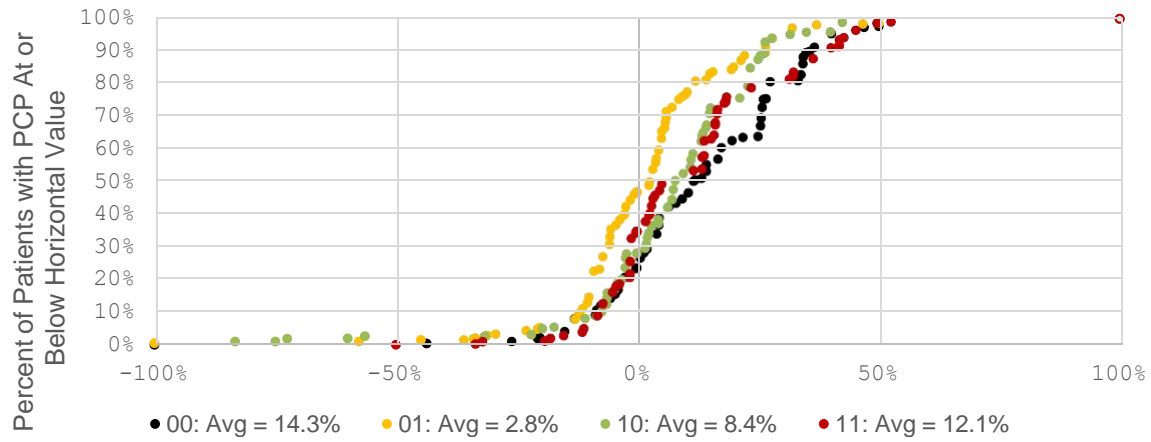

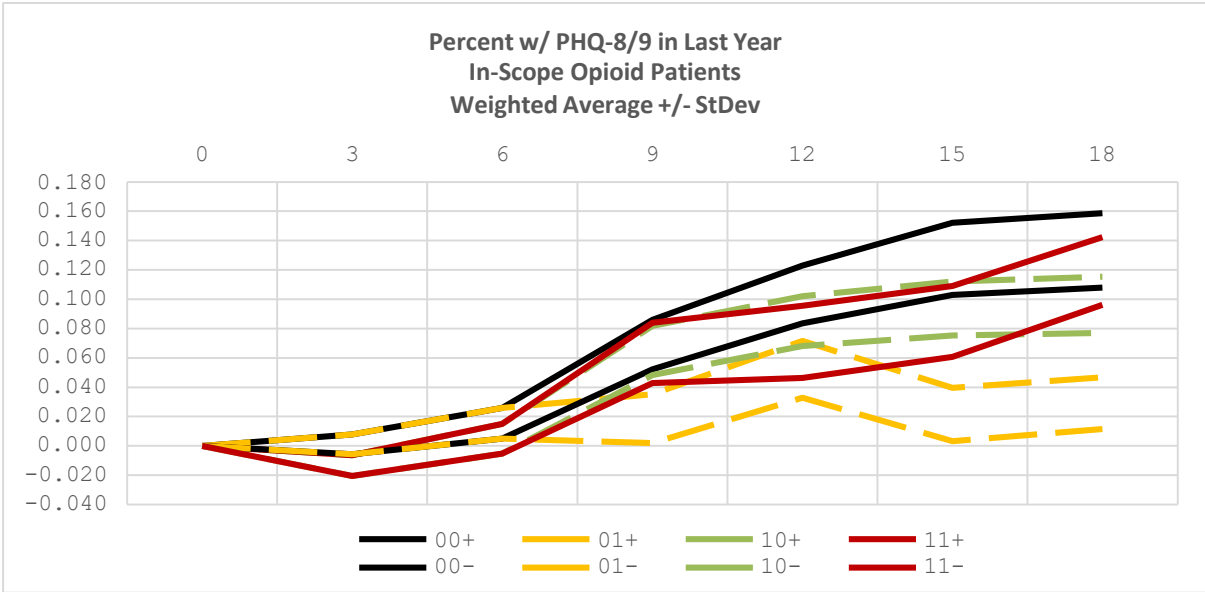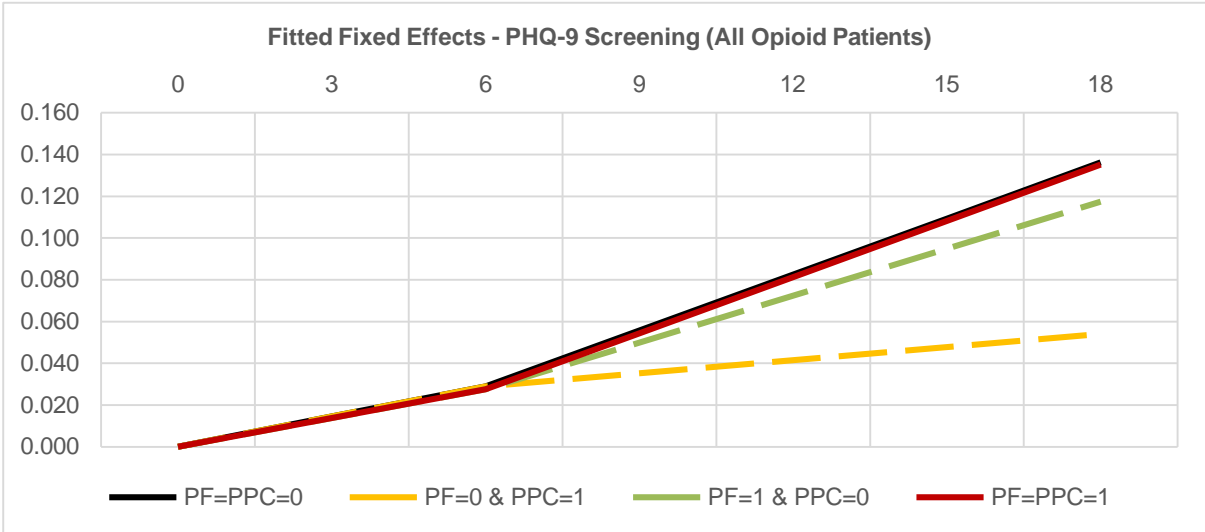

| PHQ-9 Screening (All Opioid Patients) |                               |              |              |          |                             |                             |                         |
|---------------------------------------|-------------------------------|--------------|--------------|----------|-----------------------------|-----------------------------|-------------------------|
| Study Month                           | Estimated Fixed Effect Curves |              |              |          | Differences                 |                             |                         |
|                                       | PF=PPC=0                      | PF=0 & PPC=1 | PF=1 & PPC=0 | PF=PPC=1 | PF=0 & PPC=1 minus PF=PPC=0 | PF=1 & PPC=0 minus PF=PPC=0 | PF=PPC=1 minus PF=PPC=0 |
| 0                                     | 0.000                         | 0.000        | 0.000        | 0.000    | 0.000                       | 0.000                       | 0.000                   |
| 3                                     | 0.015                         | 0.015        | 0.014        | 0.014    | 0.000                       | -0.001                      | -0.001                  |
| 6                                     | 0.029                         | 0.029        | 0.028        | 0.028    | 0.000                       | -0.002                      | -0.002                  |
| 9                                     | 0.056                         | 0.035        | 0.050        | 0.054    | -0.021                      | -0.006                      | -0.001                  |
| 12                                    | 0.083                         | 0.042        | 0.072        | 0.081    | -0.041                      | -0.010                      | -0.001                  |
| 15                                    | 0.109                         | 0.048        | 0.095        | 0.108    | -0.062                      | -0.014                      | -0.001                  |
| 18                                    | 0.136                         | 0.054        | 0.117        | 0.135    | -0.082                      | -0.019                      | -0.001                  |
| Std Dev of Estimated Values           |                               |              |              |          |                             |                             |                         |
| 0                                     | 0.000                         | 0.000        | 0.000        | 0.000    | 0.000                       | 0.000                       | 0.000                   |
| 3                                     | 0.006                         | 0.006        | 0.006        | 0.006    | 0.000                       | 0.008                       | 0.008                   |
| 6                                     | 0.011                         | 0.011        | 0.011        | 0.011    | 0.000                       | 0.016                       | 0.016                   |
| 9                                     | 0.012                         | 0.012        | 0.012        | 0.012    | 0.006                       | 0.017                       | 0.017                   |
| 12                                    | 0.015                         | 0.014        | 0.014        | 0.014    | 0.013                       | 0.020                       | 0.020                   |
| 15                                    | 0.018                         | 0.017        | 0.017        | 0.017    | 0.019                       | 0.024                       | 0.024                   |
| 18                                    | 0.021                         | 0.021        | 0.020        | 0.020    | 0.026                       | 0.029                       | 0.029                   |
| t-ratios of Estimated Values          |                               |              |              |          |                             |                             |                         |
| 0                                     |                               |              |              |          |                             |                             |                         |
| 3                                     | 2.56                          | 2.56         | 2.44         | 2.44     |                             | -0.10                       | -0.10                   |
| 6                                     | 2.56                          | 2.56         | 2.44         | 2.44     |                             | -0.10                       | -0.10                   |
| 9                                     | 4.56                          | 2.94         | 4.16         | 4.57     | -3.20                       | -0.35                       | -0.08                   |
| 12                                    | 5.68                          | 2.93         | 5.18         | 5.88     | -3.20                       | -0.51                       | -0.06                   |
| 15                                    | 6.17                          | 2.76         | 5.67         | 6.53     | -3.20                       | -0.60                       | -0.05                   |
| 18                                    | 6.36                          | 2.58         | 5.89         | 6.82     | -3.20                       | -0.65                       | -0.03                   |

| Covariance Parameter Estimates |         |          | Std Dev & Correlation |        |        |
|--------------------------------|---------|----------|-----------------------|--------|--------|
| Cov Parm                       | Subject | Estimate |                       |        |        |
| Intercept                      | Clinic  | 0.0066   | Clinic                | 0.0812 |        |
| UN(1,1)                        | PCP     | 0.0132   |                       |        |        |
| UN(2,1)                        | PCP     | (0.0008) |                       |        |        |
| UN(2,2)                        | PCP     | 0.0002   | PCP                   | 0.1150 |        |
| UN(3,1)                        | PCP     | 0.0003   |                       | -46.7% | 0.0147 |
| UN(3,2)                        | PCP     | (0.0002) |                       | 17.9%  | -82.8% |
| UN(3,3)                        | PCP     | 0.0002   |                       |        | 0.0140 |
| Residual                       |         | 0.1375   | Residual              | 0.3708 |        |

| Solution for Fixed Effects |           |          |                |     |         |         |
|----------------------------|-----------|----------|----------------|-----|---------|---------|
| Effect                     | system    | Estimate | Standard Error | DF  | t Value | Pr >  t |
| system                     | Bellin    | 0.3037   | 0.0251         | 866 | 12.11   | <.0001  |
| system                     | UW Health | 0.2204   | 0.0258         | 866 | 8.54    | <.0001  |
| clinic_size                |           | 0.0000   | 0.0000         | 866 | -0.37   | 0.711   |
| t7                         |           | 0.0048   | 0.0019         | 263 | 2.56    | 0.011   |
| PF_t7                      |           | -0.0003  | 0.0026         | 866 | -0.09   | 0.925   |
| t13                        |           | 0.0041   | 0.0024         | 214 | 1.70    | 0.091   |
| PF_t13                     |           | -0.0012  | 0.0034         | 866 | -0.35   | 0.725   |
| PPC_t13                    |           | -0.0068  | 0.0021         | 866 | -3.20   | 0.001   |
| PFandPPC_t13               |           | 0.0083   | 0.0030         | 866 | 2.76    | 0.006   |

| Estimates                       |          |                |     |         |         |
|---------------------------------|----------|----------------|-----|---------|---------|
| Label                           | Estimate | Standard Error | DF  | t Value | Pr >  t |
| <b>NOINT Chg</b>                | 0.1362   | 0.0215         | 866 | 6.35    | <.0001  |
| <b>PF Only Chg</b>              | 0.1175   | 0.0214         | 866 | 5.50    | <.0001  |
| <b>PPC Only Chg</b>             | 0.0541   | 0.0210         | 866 | 2.57    | 0.010   |
| <b>PF &amp; PPC Chg</b>         | 0.1353   | 0.0213         | 866 | 6.36    | <.0001  |
| <b>PF Only vs NOINT</b>         | -0.0187  | 0.0298         | 866 | -0.63   | 0.530   |
| <b>PPC Only vs NOINT</b>        | -0.0821  | 0.0256         | 866 | -3.20   | 0.001   |
| <b>PF Only vs PPC Only 1</b>    | 0.0634   | 0.0295         | 866 | 2.15    | 0.032   |
| <b>PF Only vs PPC Only 2</b>    | 0.0648   | 0.0255         | 866 | 2.54    | 0.011   |
| <b>PF &amp; PPC Interaction</b> | 0.0999   | 0.0362         | 866 | 2.76    | 0.006   |
| <b>PF &amp; PPC vs NOINT</b>    | -0.0009  | 0.0298         | 866 | -0.03   | 0.975   |

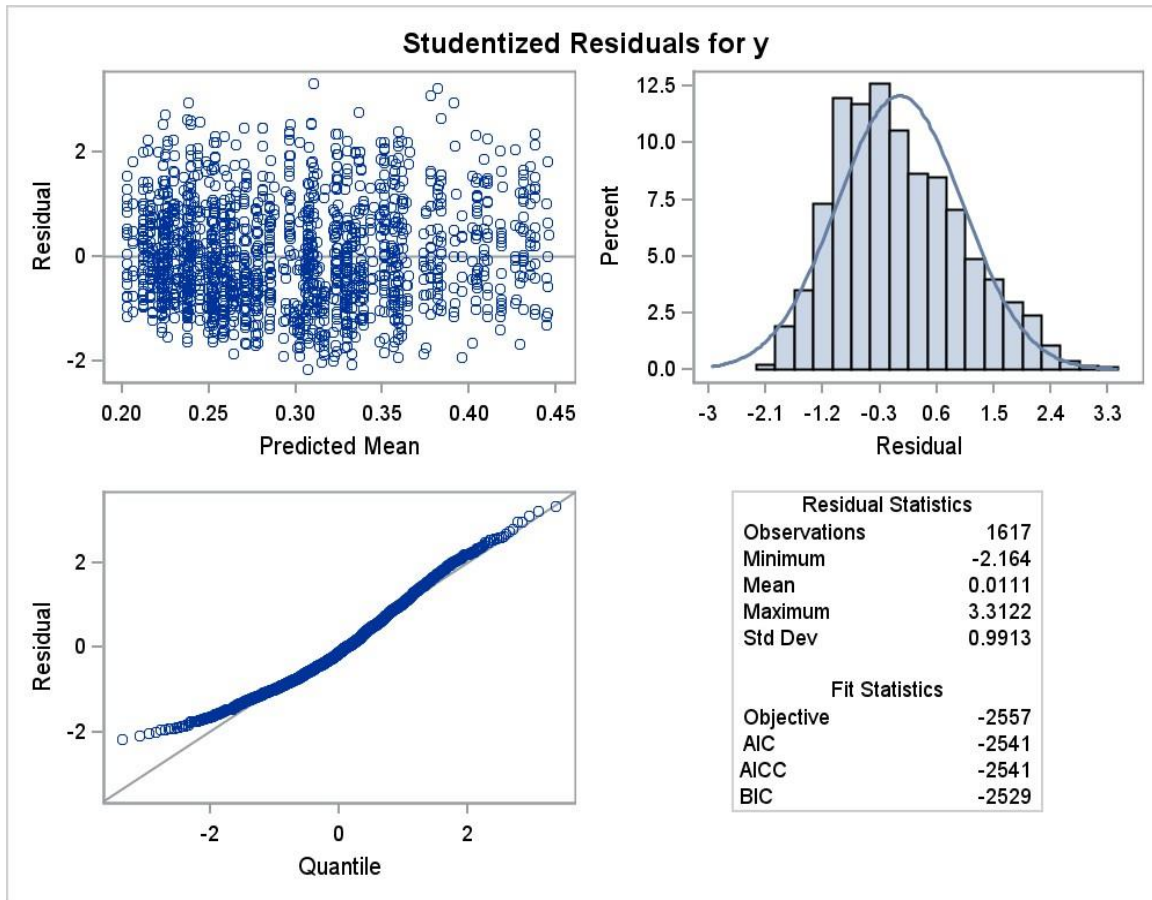

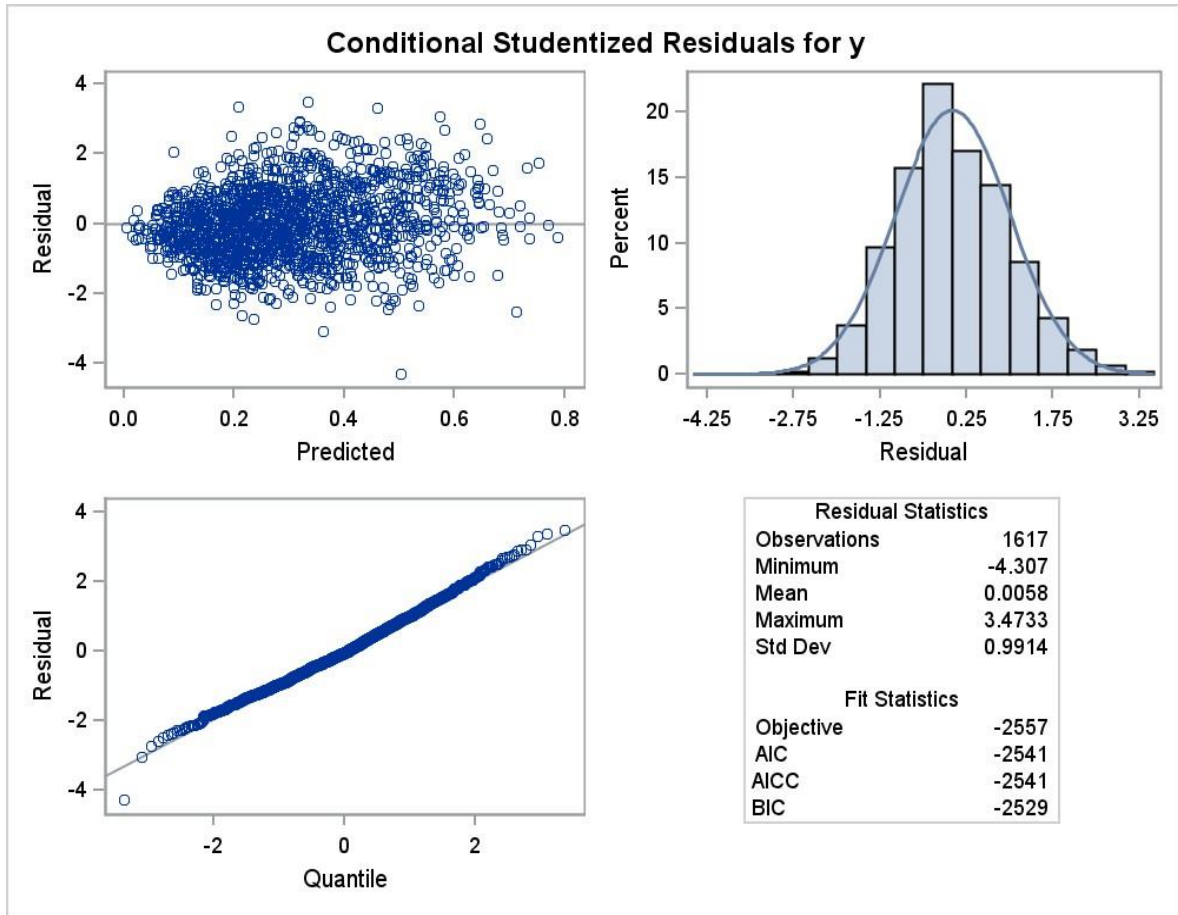

Appendix B7 – Percent of Opioid Patients with PEG-3 Pain Screen in Last 12 Months (All Opioid Patients)



### Change in PEG-3 Screening (All Opioid Patients) Over 18 Months

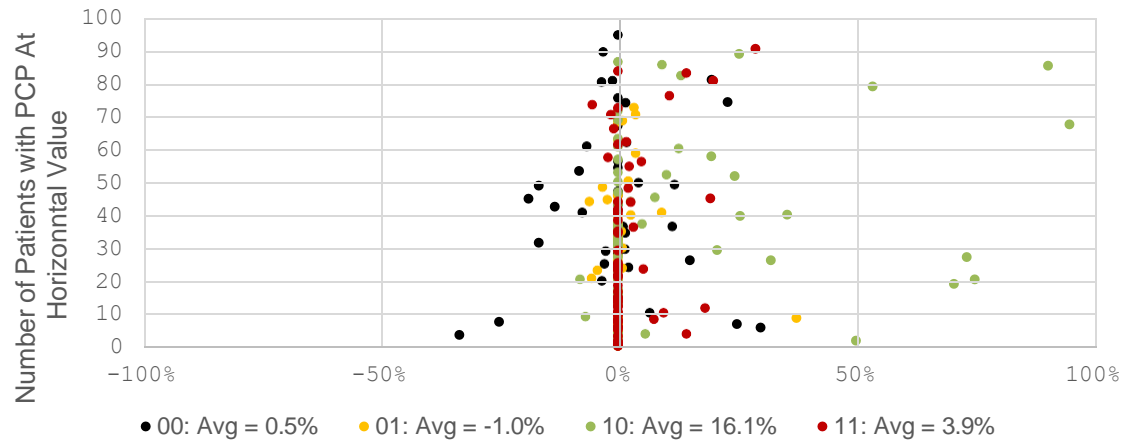

### Change in PEG-3 Screening (All Opioid Patients) Over 18 Months

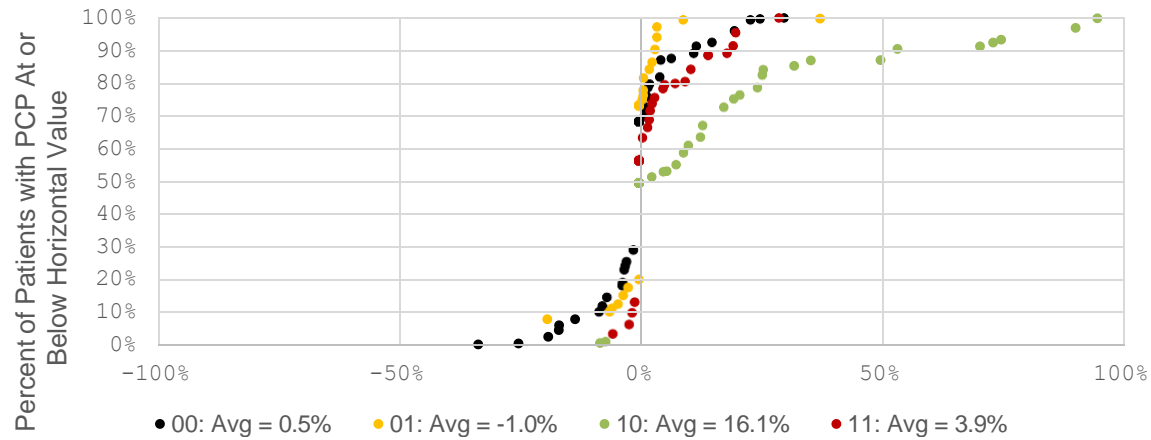

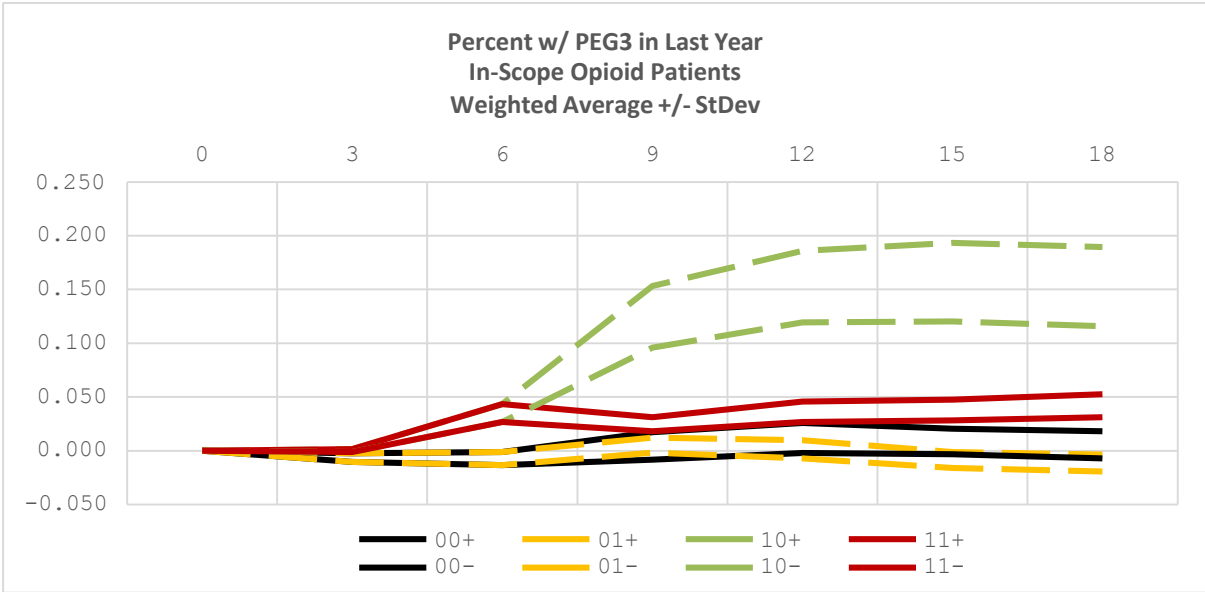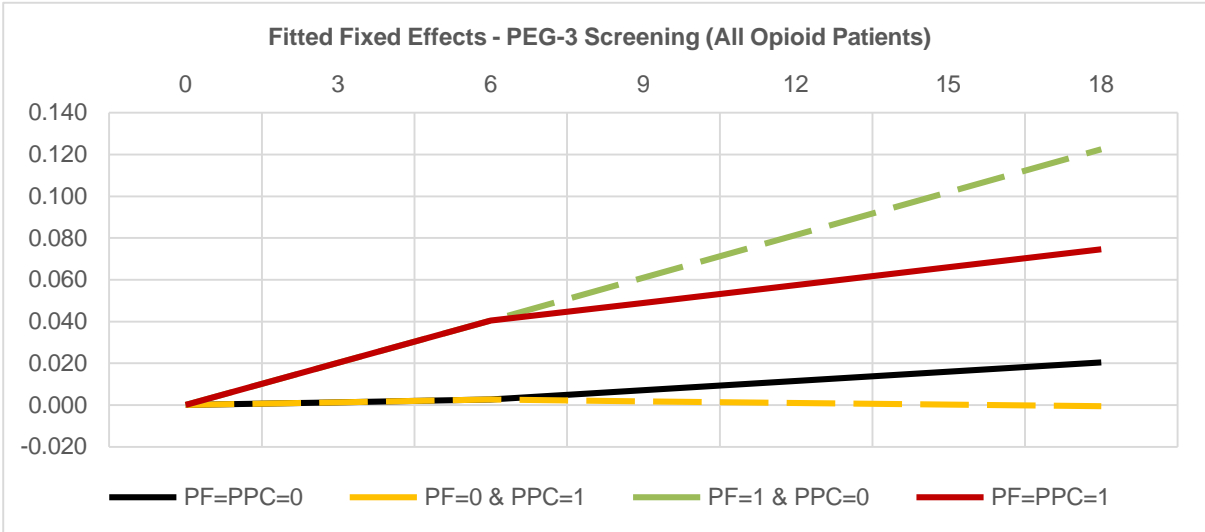

| PEG-3 Screening (All Opioid Patients) |                               |              |              |          |                             |                             |                         |
|---------------------------------------|-------------------------------|--------------|--------------|----------|-----------------------------|-----------------------------|-------------------------|
| Study Month                           | Estimated Fixed Effect Curves |              |              |          | Differences                 |                             |                         |
|                                       | PF=PPC=0                      | PF=0 & PPC=1 | PF=1 & PPC=0 | PF=PPC=1 | PF=0 & PPC=1 minus PF=PPC=0 | PF=1 & PPC=0 minus PF=PPC=0 | PF=PPC=1 minus PF=PPC=0 |
| 0                                     | 0.000                         | 0.000        | 0.000        | 0.000    | 0.000                       | 0.000                       | 0.000                   |
| 3                                     | 0.001                         | 0.001        | 0.020        | 0.020    | 0.000                       | 0.019                       | 0.019                   |
| 6                                     | 0.003                         | 0.003        | 0.040        | 0.040    | 0.000                       | 0.038                       | 0.038                   |
| 9                                     | 0.007                         | 0.002        | 0.061        | 0.049    | -0.005                      | 0.054                       | 0.042                   |
| 12                                    | 0.011                         | 0.001        | 0.081        | 0.057    | -0.010                      | 0.070                       | 0.046                   |
| 15                                    | 0.016                         | 0.000        | 0.102        | 0.066    | -0.016                      | 0.086                       | 0.050                   |
| 18                                    | 0.020                         | -0.001       | 0.123        | 0.075    | -0.021                      | 0.102                       | 0.054                   |
| Std Dev of Estimated Values           |                               |              |              |          |                             |                             |                         |
| 0                                     | 0.000                         | 0.000        | 0.000        | 0.000    | 0.000                       | 0.000                       | 0.000                   |
| 3                                     | 0.004                         | 0.004        | 0.004        | 0.004    | 0.000                       | 0.006                       | 0.006                   |
| 6                                     | 0.009                         | 0.009        | 0.009        | 0.009    | 0.000                       | 0.012                       | 0.012                   |
| 9                                     | 0.010                         | 0.010        | 0.010        | 0.010    | 0.005                       | 0.015                       | 0.014                   |
| 12                                    | 0.013                         | 0.012        | 0.013        | 0.012    | 0.009                       | 0.018                       | 0.018                   |
| 15                                    | 0.015                         | 0.015        | 0.015        | 0.015    | 0.014                       | 0.022                       | 0.021                   |
| 18                                    | 0.018                         | 0.018        | 0.018        | 0.018    | 0.019                       | 0.026                       | 0.026                   |
| t-ratios of Estimated Values          |                               |              |              |          |                             |                             |                         |
| 0                                     |                               |              |              |          |                             |                             |                         |
| 3                                     | 0.29                          | 0.29         | 4.53         | 4.53     |                             | 3.03                        | 3.03                    |
| 6                                     | 0.29                          | 0.29         | 4.53         | 4.53     |                             | 3.03                        | 3.03                    |
| 9                                     | 0.68                          | 0.18         | 5.85         | 4.75     | -1.11                       | 3.70                        | 2.89                    |
| 12                                    | 0.91                          | 0.08         | 6.42         | 4.61     | -1.11                       | 3.94                        | 2.61                    |
| 15                                    | 1.04                          | 0.02         | 6.63         | 4.37     | -1.11                       | 3.98                        | 2.34                    |
| 18                                    | 1.11                          | -0.03        | 6.69         | 4.13     | -1.11                       | 3.96                        | 2.12                    |

| Covariance Parameter Estimates |         |          | Std Dev & Correlation |        |        |
|--------------------------------|---------|----------|-----------------------|--------|--------|
| Cov Parm                       | Subject | Estimate |                       |        |        |
| Intercept                      | Clinic  | 0.0018   | Clinic                | 0.0428 |        |
| UN(1,1)                        | PCP     | 0.0031   |                       |        |        |
| UN(2,1)                        | PCP     | (0.0002) |                       |        |        |
| UN(2,2)                        | PCP     | 0.0002   | PCP                   | 0.0560 |        |
| UN(3,1)                        | PCP     | 0.0001   |                       | -29.4% | 0.0140 |
| UN(3,2)                        | PCP     | (0.0001) |                       | 20.1%  | -86.1% |
| UN(3,3)                        | PCP     | 0.0001   |                       |        | 0.0108 |
| Residual                       |         | 0.0440   | Residual              | 0.2099 |        |

| Solution for Fixed Effects |           |          |                |     |         |         |
|----------------------------|-----------|----------|----------------|-----|---------|---------|
| Effect                     | system    | Estimate | Standard Error | DF  | t Value | Pr >  t |
| system                     | Bellin    | 0.0029   | 0.0135         | 866 | 0.21    | 0.8320  |
| system                     | UW Health | 0.0317   | 0.0137         | 866 | 2.31    | 0.0213  |
| clinic_size                |           | 0.0000   | 0.0000         | 866 | 1.29    | 0.197   |
| t7                         |           | 0.0004   | 0.0015         | 263 | 0.29    | 0.770   |
| PF_t7                      |           | 0.0063   | 0.0021         | 866 | 3.03    | 0.003   |
| t13                        |           | 0.0010   | 0.0016         | 214 | 0.65    | 0.515   |
| PF_t13                     |           | -0.0009  | 0.0023         | 866 | -0.42   | 0.676   |
| PPC_t13                    |           | -0.0017  | 0.0016         | 866 | -1.11   | 0.267   |
| PFandPPC_t13               |           | -0.0023  | 0.0022         | 866 | -1.02   | 0.308   |

| Estimates                       |          |                |     |         |         |
|---------------------------------|----------|----------------|-----|---------|---------|
| Label                           | Estimate | Standard Error | DF  | t Value | Pr >  t |
| <b>NOINT Chg</b>                | 0.0204   | 0.0184         | 866 | 1.11    | 0.268   |
| <b>PF Only Chg</b>              | 0.1225   | 0.0184         | 866 | 6.67    | <.0001  |
| <b>PPC Only Chg</b>             | -0.0006  | 0.0180         | 866 | -0.03   | 0.975   |
| <b>PF &amp; PPC Chg</b>         | 0.0745   | 0.0181         | 866 | 4.12    | <.0001  |
| <b>PF Only vs NOINT</b>         | 0.1022   | 0.0258         | 866 | 3.95    | <.0001  |
| <b>PPC Only vs NOINT</b>        | -0.0209  | 0.0189         | 866 | -1.11   | 0.267   |
| <b>PF Only vs PPC Only 1</b>    | 0.1231   | 0.0256         | 866 | 4.81    | <.0001  |
| <b>PF Only vs PPC Only 2</b>    | 0.0853   | 0.0194         | 866 | 4.39    | <.0001  |
| <b>PF &amp; PPC Interaction</b> | -0.0271  | 0.0266         | 866 | -1.02   | 0.308   |
| <b>PF &amp; PPC vs NOINT</b>    | 0.0541   | 0.0256         | 866 | 2.11    | 0.035   |

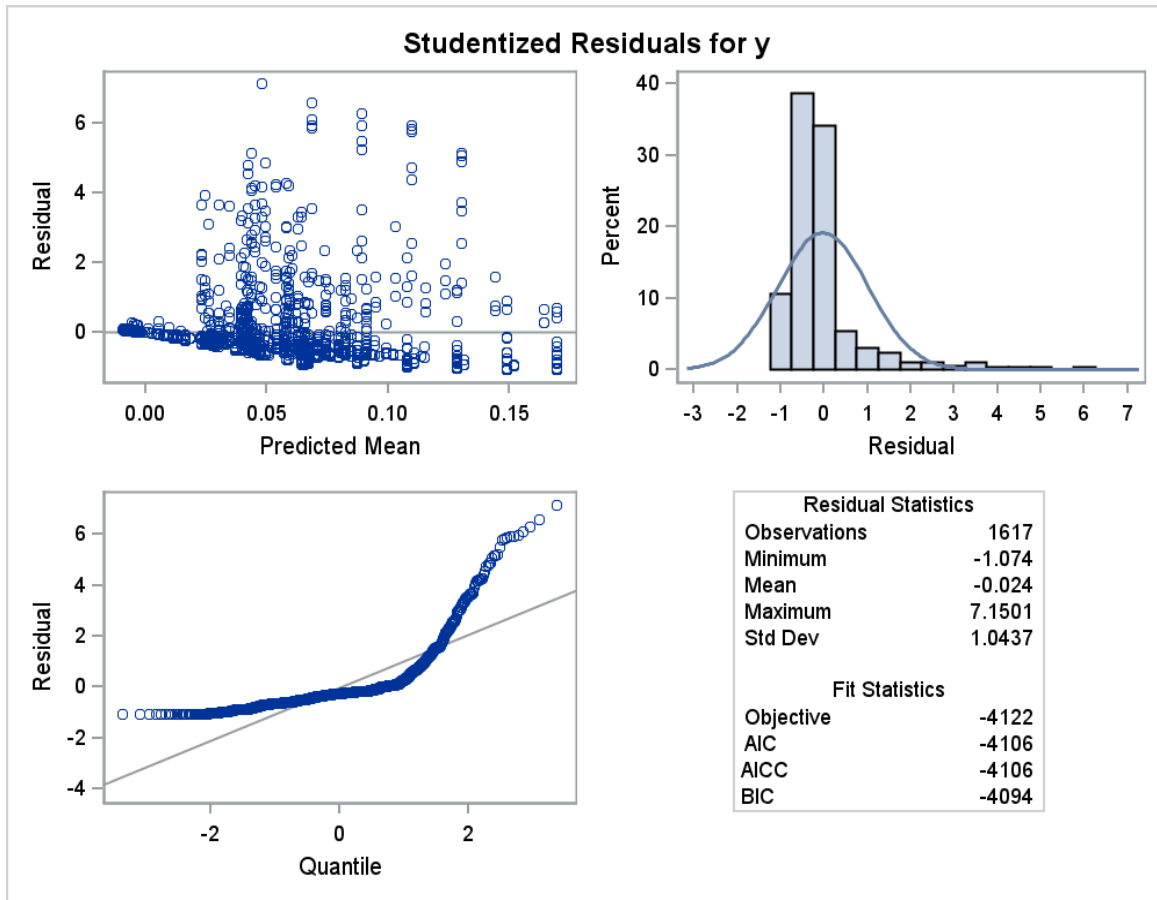

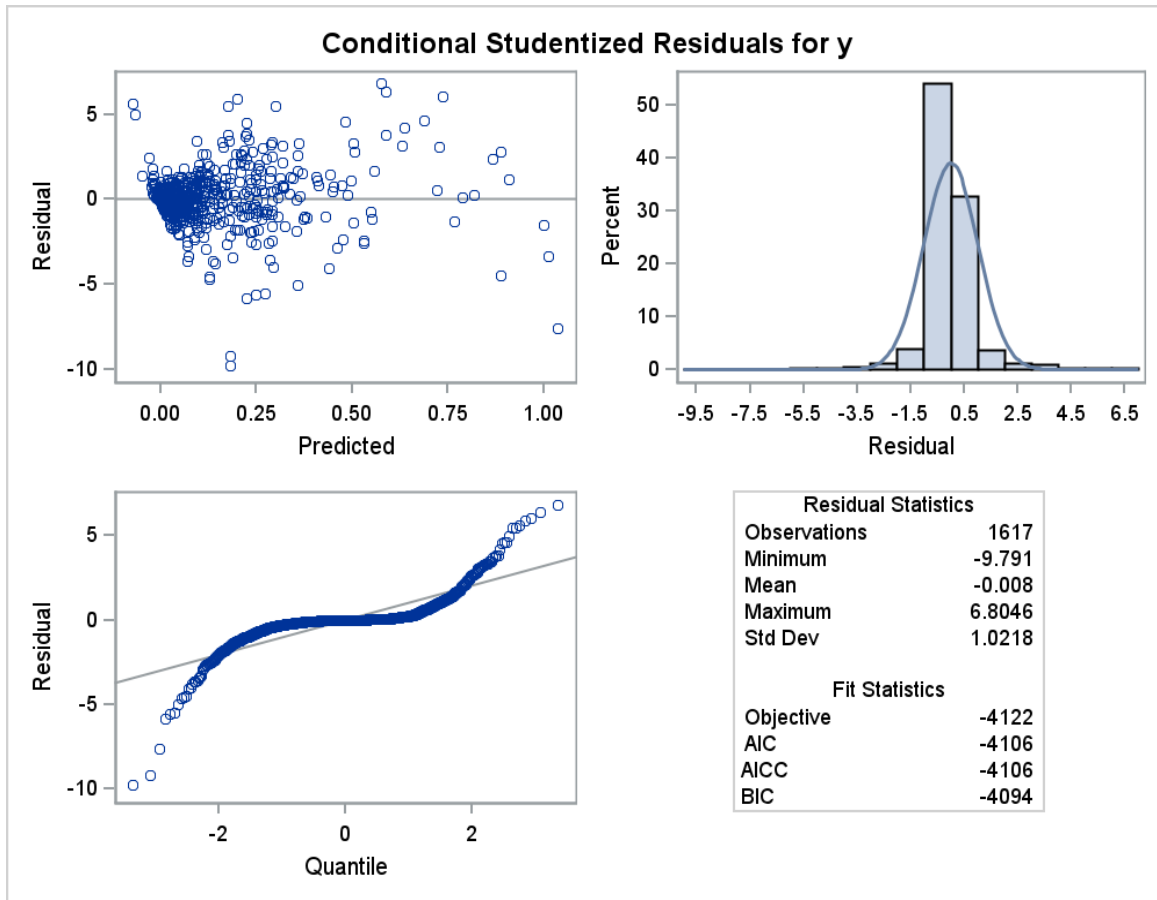

Appendix C – Primary Model Results (Less than 3-Mth Opioid Patients)

Appendix C1 – Average MME Prescribed in Last 3 Months (Less than 3-Mth Opioid Patients)

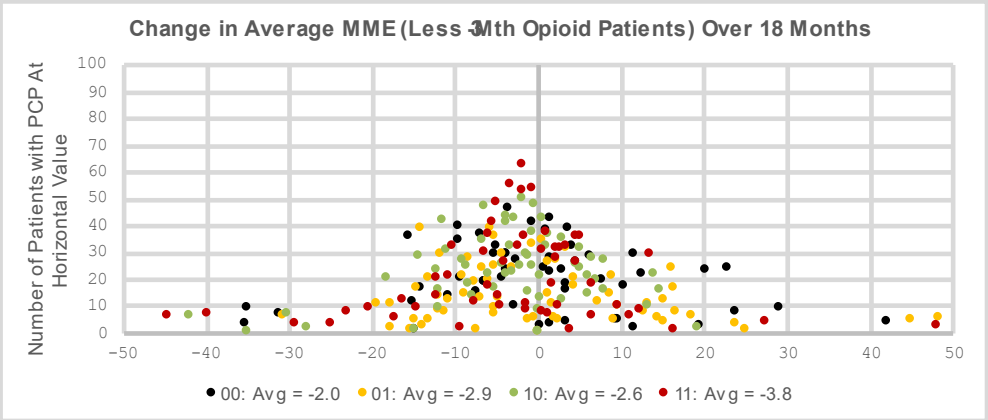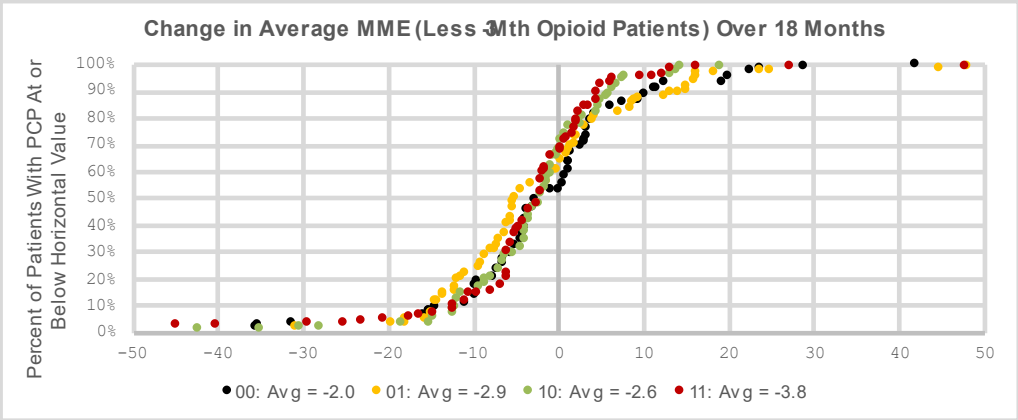



Average MME Prescribed in Last Quarter  
 In-Scope Less than 3 -Mth Opioid Users  
 Weighted Average +/- StDev

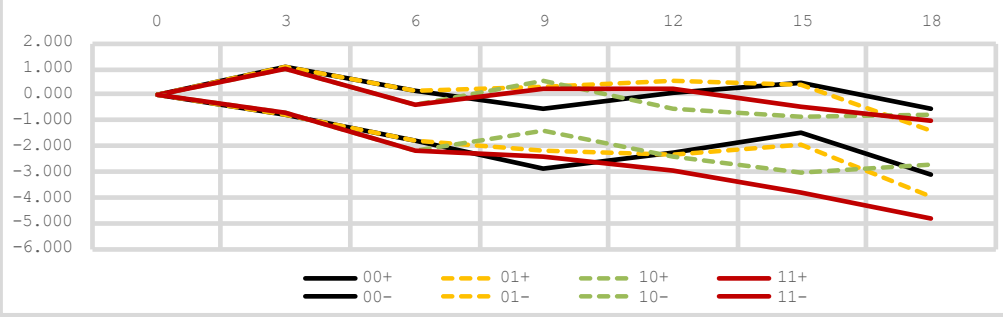

Fitted Fixed Effects- Average MME (Less 3-Mth Opioid Patients)

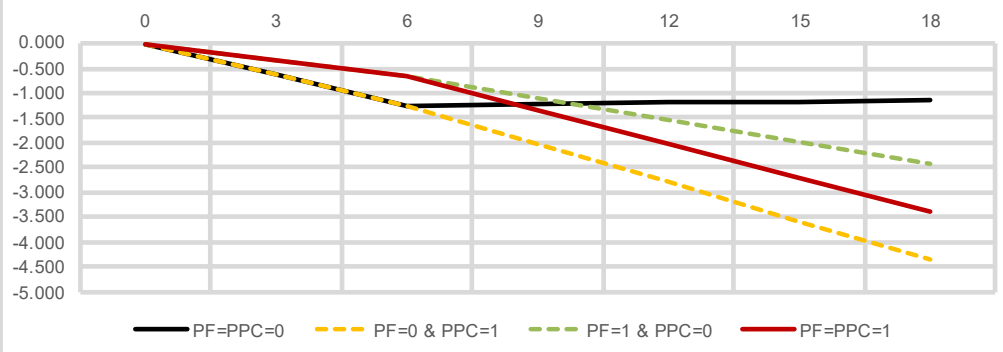

### Average MME (Less 3-Mth Opioid Patients)

| Study Month                         | Estimated Fixed Effect Curves |              |              |          | Differences  |              |                |
|-------------------------------------|-------------------------------|--------------|--------------|----------|--------------|--------------|----------------|
|                                     | PF=PPC=0                      | PF=0 & PPC=1 | PF=1 & PPC=0 | PF=PPC=1 | PF=0 & PPC=1 | PF=1 & PPC=0 | PF=PPC=1 minus |
| 0                                   | 0.000                         | 0.000        | 0.000        | 0.000    | 0.000        | 0.000        | 0.000          |
| 3                                   | -0.622                        | -0.622       | -0.326       | -0.326   | 0.000        | 0.296        | 0.296          |
| 6                                   | -1.244                        | -1.244       | -0.651       | -0.651   | 0.000        | 0.592        | 0.592          |
| 9                                   | -1.218                        | -2.023       | -1.094       | -1.331   | -0.804       | 0.124        | -0.113         |
| 12                                  | -1.193                        | -2.801       | -1.536       | -2.011   | -1.609       | -0.343       | -0.819         |
| 15                                  | -1.167                        | -3.580       | -1.979       | -2.691   | -2.413       | -0.811       | -1.524         |
| 18                                  | -1.142                        | -4.359       | -2.421       | -3.371   | -3.217       | -1.279       | -2.230         |
| <b>Std Dev of Estimated Values</b>  |                               |              |              |          |              |              |                |
| 0                                   | 0.000                         | 0.000        | 0.000        | 0.000    | 0.000        | 0.000        | 0.000          |
| 3                                   | 0.334                         | 0.334        | 0.299        | 0.299    | 0.000        | 0.426        | 0.426          |
| 6                                   | 0.669                         | 0.669        | 0.598        | 0.598    | 0.000        | 0.853        | 0.853          |
| 9                                   | 0.608                         | 0.608        | 0.550        | 0.554    | 0.284        | 0.766        | 0.768          |
| 12                                  | 0.625                         | 0.631        | 0.574        | 0.586    | 0.568        | 0.790        | 0.800          |
| 15                                  | 0.715                         | 0.729        | 0.660        | 0.684    | 0.852        | 0.918        | 0.936          |
| 18                                  | 0.854                         | 0.878        | 0.790        | 0.825    | 1.136        | 1.113        | 1.140          |
| <b>t-ratios of Estimated Values</b> |                               |              |              |          |              |              |                |
| 0                                   |                               |              |              |          |              |              |                |
| 3                                   | -1.86                         | -1.86        | -1.09        | -1.09    |              | 0.69         | 0.69           |
| 6                                   | -1.86                         | -1.86        | -1.09        | -1.09    |              | 0.69         | 0.69           |
| 9                                   | -2.00                         | -3.32        | -1.99        | -2.40    | -2.83        | 0.16         | -0.15          |
| 12                                  | -1.91                         | -4.44        | -2.68        | -3.43    | -2.83        | -0.43        | -1.02          |
| 15                                  | -1.63                         | -4.91        | -3.00        | -3.93    | -2.83        | -0.88        | -1.63          |
| 18                                  | -1.34                         | -4.96        | -3.06        | -4.08    | -2.83        | -1.15        | -1.96          |

| Covariance Parameter Estimates |         |          |                       |         |         |
|--------------------------------|---------|----------|-----------------------|---------|---------|
| Cov Parm                       | Subject | Estimate | Std Dev & Correlation |         |         |
| Intercept                      | Clinic  | 5.1232   | Clinic                | 2.26    |         |
| UN(1,1)                        | PCP     | 10.8787  |                       |         |         |
| UN(2,1)                        | PCP     | 0.1419   |                       |         |         |
| UN(2,2)                        | PCP     | 0.0333   | PCP                   | 3.30    |         |
| UN(3,1)                        | PCP     | (0.8948) |                       | 23.6%   | 0.18    |
| UN(3,2)                        | PCP     | (0.0027) |                       | #DIV/0! | #DIV/0! |
| UN(3,3)                        | PCP     | -        |                       |         | -       |
| Residual                       |         | 607.1300 | Residual              | 24.64   |         |

| Solution for Fixed Effects |           |          |                |     |         |         |
|----------------------------|-----------|----------|----------------|-----|---------|---------|
| Effect                     | System    | Estimate | Standard Error | DF  | t Value | Pr >  t |
| System                     | Bellin    | 31.6626  | 0.8001         | 781 | 39.58   | <.0001  |
| System                     | UW Health | 38.7945  | 0.8130         | 781 | 47.71   | <.0001  |
| clinic_size                |           | -0.00008 | 0.000070       | 781 | -1.10   | 0.2696  |
| t7                         |           | -0.2073  | 0.1114         | 249 | -1.86   | 0.0640  |
| PF_t7                      |           | 0.09873  | 0.1421         | 781 | 0.69    | 0.4874  |
| t13                        |           | 0.2158   | 0.1580         | 201 | 1.37    | 0.1736  |
| PF_t13                     |           | -0.2547  | 0.2072         | 781 | -1.23   | 0.2195  |
| PPC_t13                    |           | -0.2681  | 0.09466        | 781 | -2.83   | 0.0047  |
| PFandPPC_t13               |           | 0.1889   | 0.1288         | 781 | 1.47    | 0.1428  |

| <b>Estimates</b>                |                 |                       |           |                |                    |
|---------------------------------|-----------------|-----------------------|-----------|----------------|--------------------|
| <b>Label</b>                    | <b>Estimate</b> | <b>Standard Error</b> | <b>DF</b> | <b>t Value</b> | <b>Pr &gt;  t </b> |
| <b>NOINT Chg</b>                | -1.1414         | 0.8548                | 781       | -1.34          | 0.1822             |
| <b>PF Only Chg</b>              | -2.4202         | 0.7903                | 781       | -3.06          | 0.0023             |
| <b>PPC Only Chg</b>             | -4.3591         | 0.8796                | 781       | -4.96          | <.0001             |
| <b>PF &amp; PPC Chg</b>         | -3.3708         | 0.8269                | 781       | -4.08          | <.0001             |
| <b>PF Only vs NOINT</b>         | -1.2789         | 1.1136                | 781       | -1.15          | 0.2512             |
| <b>PPC Only vs NOINT</b>        | -3.2177         | 1.1359                | 781       | -2.83          | 0.0047             |
| <b>PF Only vs PPC Only 1</b>    | 1.9389          | 1.1307                | 781       | 1.71           | 0.0868             |
| <b>PF Only vs PPC Only 2</b>    | 1.3465          | 1.2211                | 781       | 1.10           | 0.2705             |
| <b>PF &amp; PPC Interaction</b> | 2.2671          | 1.5455                | 781       | 1.47           | 0.1428             |
| <b>PF &amp; PPC vs NOINT</b>    | -2.2295         | 1.1406                | 781       | -1.95          | 0.0510             |

### Studentized Residuals for y

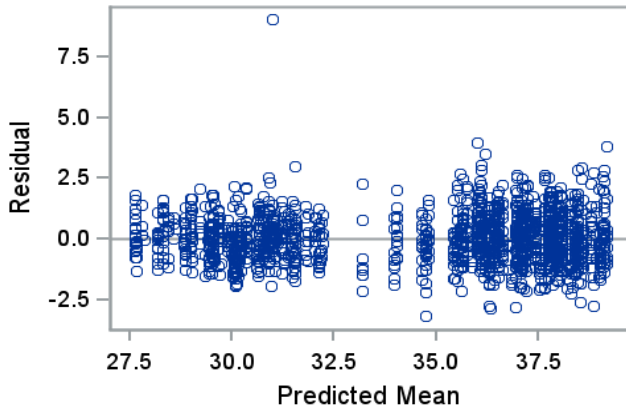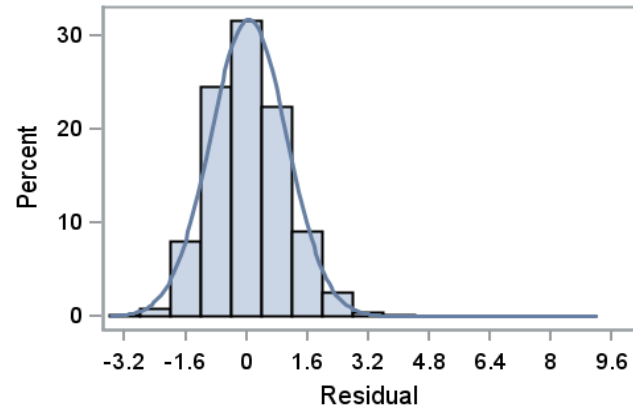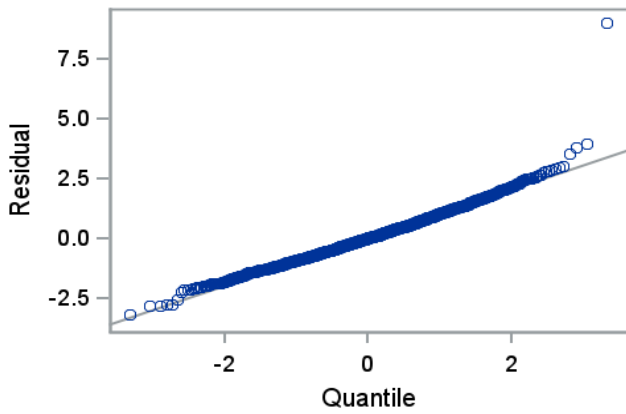

| Residual Statistics |        |
|---------------------|--------|
| Observations        | 1499   |
| Minimum             | -3.164 |
| Mean                | 0.0551 |
| Maximum             | 9.0189 |
| Std Dev             | 1.0045 |

  

| Fit Statistics |       |
|----------------|-------|
| Objective      | 10017 |
| AIC            | 10031 |
| AICC           | 10031 |
| BIC            | 10041 |

### Conditional Studentized Residuals for y

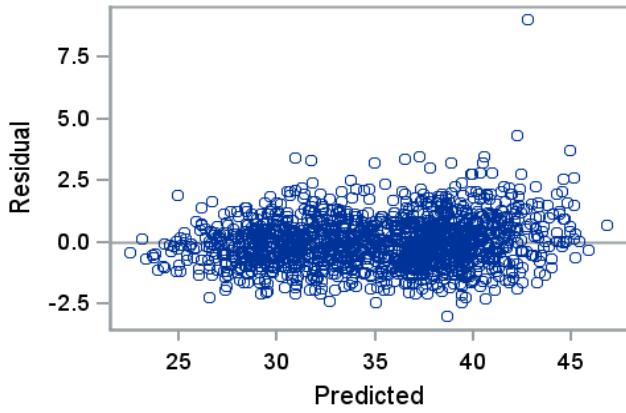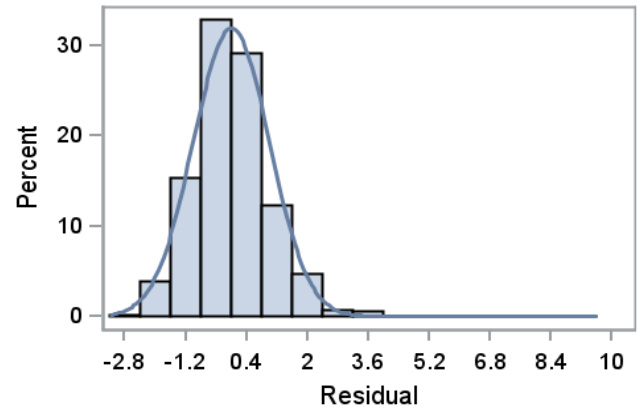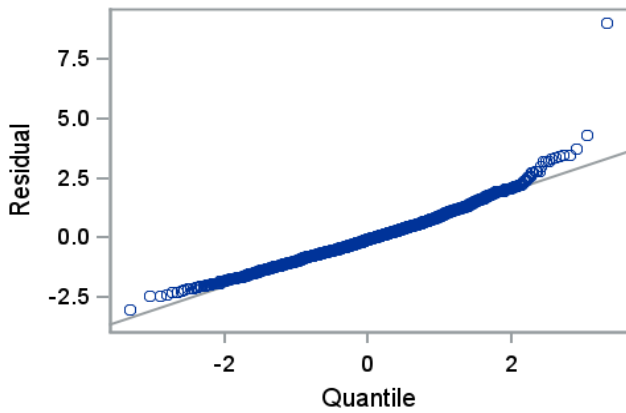

| Residual Statistics |        |
|---------------------|--------|
| Observations        | 1499   |
| Minimum             | -3.01  |
| Mean                | 0.0006 |
| Maximum             | 9.0379 |
| Std Dev             | 1.001  |

  

| Fit Statistics |       |
|----------------|-------|
| Objective      | 10017 |
| AIC            | 10031 |
| AICC           | 10031 |
| BIC            | 10041 |

Appendix C2 – Percent of Opioid Patients with Average MME  $\geq$  90 mg/day (Less than 3-Mth Opioid Patients)

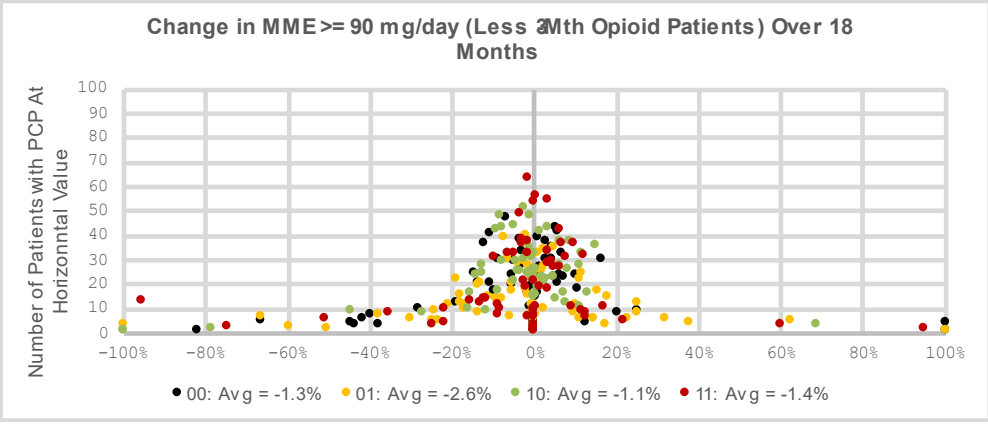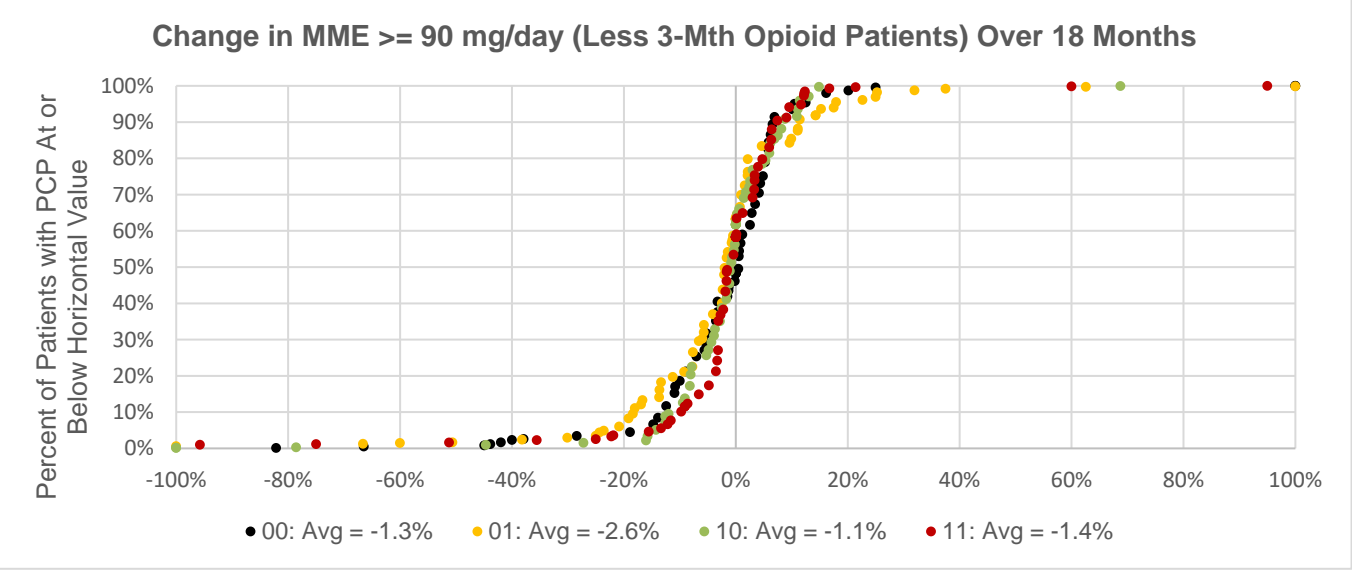

Percent w/ MME  $\geq$  90 mg/day  
 In-Scope Less than 3 -Mth Opioid Users  
 Weighted Average +/- StDev

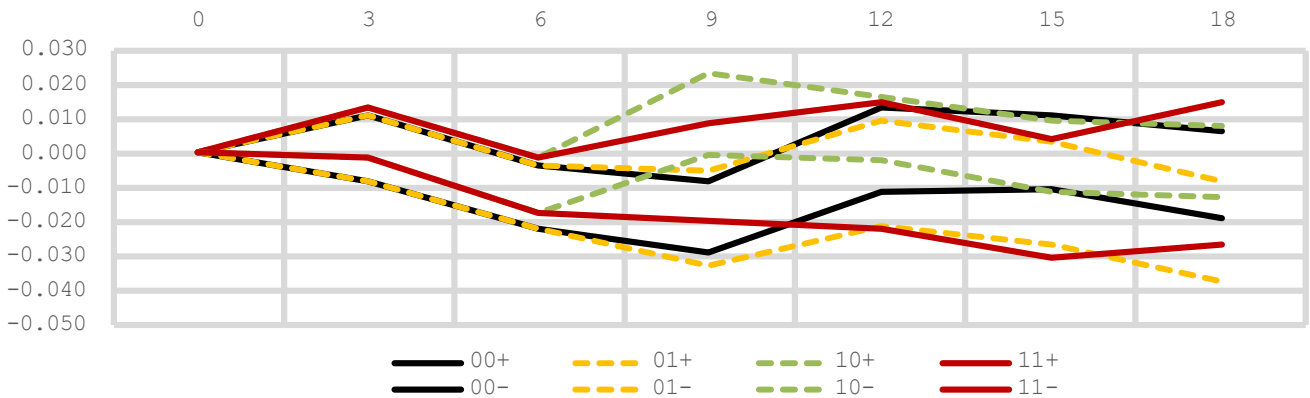

Fitted Fixed Effects- MME  $\geq$  90 mg/day (Less 3Mth Opioid Patients)

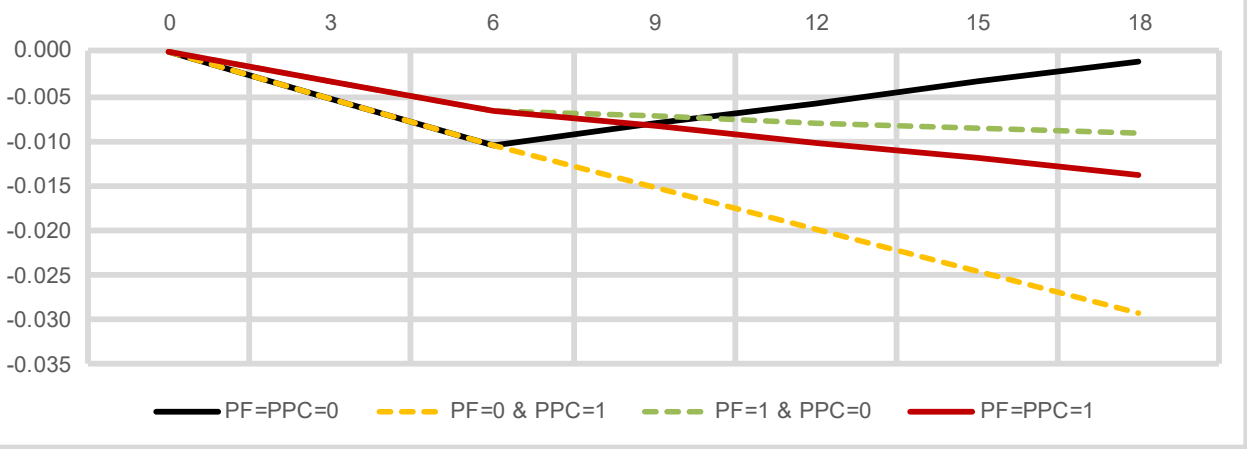



### MME >= 90 mg/day (Less 3-Mth Opioid Patients)

| Study Month                  | Estimated Fixed Effect Curves |              |              |          | Differences  |              |                |
|------------------------------|-------------------------------|--------------|--------------|----------|--------------|--------------|----------------|
|                              | PF=PPC=0                      | PF=0 & PPC=1 | PF=1 & PPC=0 | PF=PPC=1 | PF=0 & PPC=1 | PF=1 & PPC=0 | PF=PPC=1 minus |
| 0                            | 0.000                         | 0.000        | 0.000        | 0.000    | 0.000        | 0.000        | 0.000          |
| 3                            | -0.005                        | -0.005       | -0.003       | -0.003   | 0.000        | 0.002        | 0.002          |
| 6                            | -0.011                        | -0.011       | -0.007       | -0.007   | 0.000        | 0.004        | 0.004          |
| 9                            | -0.008                        | -0.015       | -0.007       | -0.008   | -0.007       | 0.001        | 0.000          |
| 12                           | -0.006                        | -0.020       | -0.008       | -0.010   | -0.014       | -0.002       | -0.004         |
| 15                           | -0.003                        | -0.025       | -0.009       | -0.012   | -0.021       | -0.005       | -0.009         |
| 18                           | -0.001                        | -0.029       | -0.009       | -0.014   | -0.028       | -0.008       | -0.013         |
| Std Dev of Estimated Values  |                               |              |              |          |              |              |                |
| 0                            | 0.000                         | 0.000        | 0.000        | 0.000    | 0.000        | 0.000        | 0.000          |
| 3                            | 0.003                         | 0.003        | 0.003        | 0.003    | 0.000        | 0.003        | 0.003          |
| 6                            | 0.006                         | 0.006        | 0.006        | 0.006    | 0.000        | 0.007        | 0.007          |
| 9                            | 0.005                         | 0.005        | 0.005        | 0.005    | 0.002        | 0.006        | 0.006          |
| 12                           | 0.005                         | 0.005        | 0.005        | 0.005    | 0.005        | 0.006        | 0.006          |
| 15                           | 0.006                         | 0.006        | 0.006        | 0.006    | 0.007        | 0.007        | 0.007          |
| 18                           | 0.007                         | 0.007        | 0.007        | 0.007    | 0.010        | 0.009        | 0.009          |
| t-ratios of Estimated Values |                               |              |              |          |              |              |                |
| 0                            |                               |              |              |          |              |              |                |
| 3                            | -1.73                         | -1.73        | -1.18        | -1.18    |              | 0.57         | 0.57           |
| 6                            | -1.73                         | -1.73        | -1.18        | -1.18    |              | 0.57         | 0.57           |
| 9                            | -1.54                         | -2.88        | -1.47        | -1.68    | -2.94        | 0.16         | -0.04          |
| 12                           | -1.10                         | -3.75        | -1.59        | -1.99    | -2.94        | -0.37        | -0.74          |
| 15                           | -0.57                         | -4.01        | -1.51        | -2.03    | -2.94        | -0.73        | -1.18          |
| 18                           | -0.15                         | -3.92        | -1.35        | -1.92    | -2.94        | -0.90        | -1.36          |

| Covariance Parameter Estimates |         |          |
|--------------------------------|---------|----------|
| Cov Parm                       | Subject | Estimate |
| Intercept                      | Clinic  | 0.0001   |
| UN(1,1)                        | PCP     | 0.0004   |
| UN(2,1)                        | PCP     | (0.0000) |
| UN(2,2)                        | PCP     | 0.0000   |
| UN(3,1)                        | PCP     | (0.0000) |
| UN(3,2)                        | PCP     | (0.0000) |
| UN(3,3)                        | PCP     | -        |
| Residual                       |         | 0.0614   |

| Std Dev & Correlation |         |         |
|-----------------------|---------|---------|
| Clinic                | 0.01    |         |
| PCP                   | 0.02    |         |
|                       | -33.9%  | 0.00    |
|                       | #DIV/0! | #DIV/0! |
| Residual              | 0.25    |         |

| Solution for Fixed Effects |           |          |                |     |         |         |
|----------------------------|-----------|----------|----------------|-----|---------|---------|
| Effect                     | System    | Estimate | Standard Error | DF  | t Value | Pr >  t |
| System                     | Bellin    | 0.04892  | 0.004799       | 784 | 10.19   | <.0001  |
| System                     | UW Health | 0.09206  | 0.004816       | 784 | 19.12   | <.0001  |
| clinic_size                |           | 0        | 0              | 784 | -Inf    | <.0001  |
| t7                         |           | -0.00175 | 0.001009       | 249 | -1.74   | 0.0837  |
| PF_t7                      |           | 0.000659 | 0.001152       | 784 | 0.57    | 0.5676  |
| t13                        |           | 0.002535 | 0.001489       | 201 | 1.70    | 0.0902  |
| PF_t13                     |           | -0.00167 | 0.001868       | 784 | -0.89   | 0.3717  |
| PPC_t13                    |           | -0.00235 | 0.000801       | 784 | -2.93   | 0.0035  |
| PFandPPC_t13               |           | 0.001970 | 0.001084       | 784 | 1.82    | 0.0694  |

| Estimates             |          |                |     |         |         |
|-----------------------|----------|----------------|-----|---------|---------|
| Label                 | Estimate | Standard Error | DF  | t Value | Pr >  t |
| NOINT Chg             | -0.00113 | 0.007417       | 784 | -0.15   | 0.8792  |
| PF Only Chg           | -0.00931 | 0.006848       | 784 | -1.36   | 0.1744  |
| PPC Only Chg          | -0.02931 | 0.007598       | 784 | -3.86   | 0.0001  |
| PF & PPC Chg          | -0.01384 | 0.007166       | 784 | -1.93   | 0.0537  |
| PF Only vs NOINT      | -0.00818 | 0.008984       | 784 | -0.91   | 0.3627  |
| PPC Only vs NOINT     | -0.02818 | 0.009608       | 784 | -2.93   | 0.0035  |
| PF Only vs PPC Only 1 | 0.02000  | 0.009099       | 784 | 2.20    | 0.0283  |
| PF Only vs PPC Only 2 | 0.01604  | 0.01142        | 784 | 1.40    | 0.1604  |
| PF & PPC Interaction  | 0.02364  | 0.01300        | 784 | 1.82    | 0.0694  |
| PF & PPC vs NOINT     | -0.01272 | 0.009263       | 784 | -1.37   | 0.1702  |

### Studentized Residuals for y

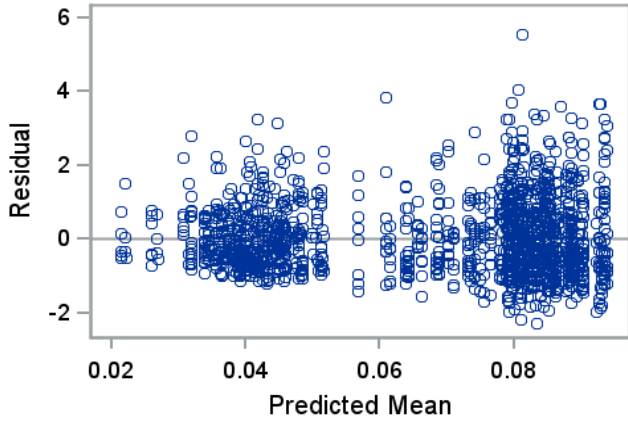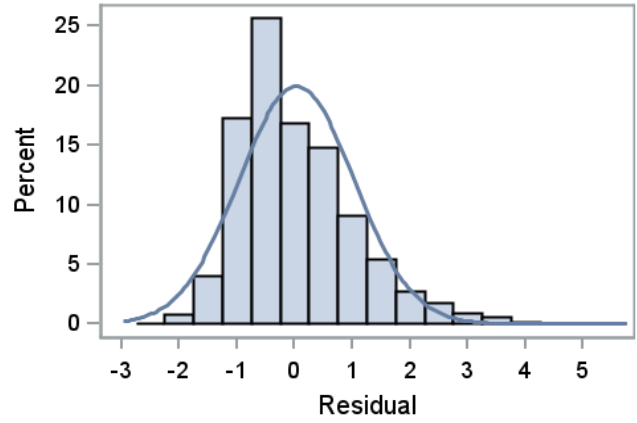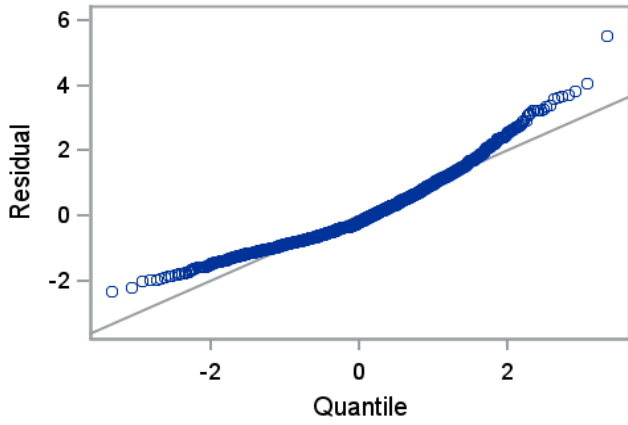

| Residual Statistics |        |
|---------------------|--------|
| Observations        | 1502   |
| Minimum             | -2.305 |
| Mean                | 0.0292 |
| Maximum             | 5.5353 |
| Std Dev             | 0.9995 |

  

| Fit Statistics |       |
|----------------|-------|
| Objective      | -3900 |
| AIC            | -3886 |
| AICC           | -3886 |
| BIC            | -3876 |

### Conditional Studentized Residuals for y

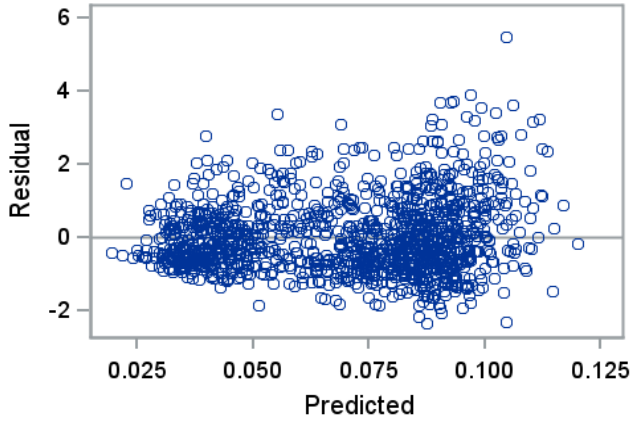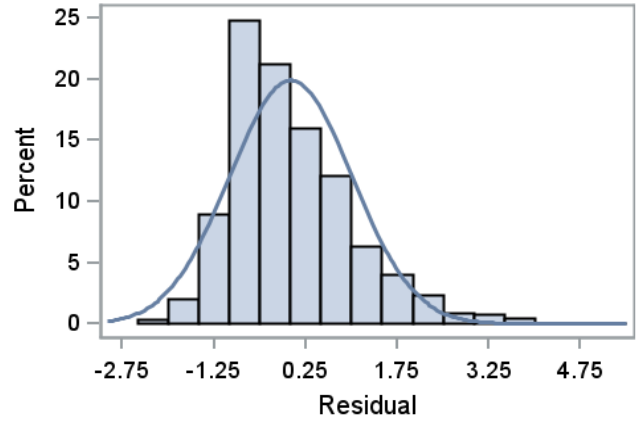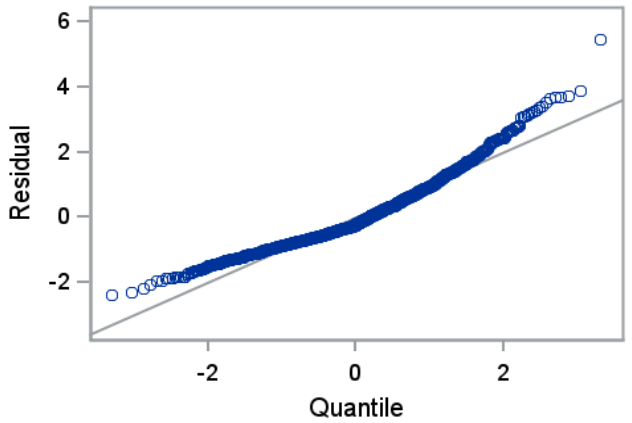

| Residual Statistics |        |
|---------------------|--------|
| Observations        | 1306   |
| Minimum             | -2.375 |
| Mean                | 0.0045 |
| Maximum             | 5.464  |
| Std Dev             | 1.0012 |
| Fit Statistics      |        |
| Objective           | -3900  |
| AIC                 | -3886  |
| AICC                | -3886  |
| BIC                 | -3876  |

Appendix C3 – Percent of Opioid Patients with Benzo’s in Last 3 Months (Less than 3-Mth Opioid Patients)

Change in Benzo Use (Less 3Mth Opioid Patients) Over 18 Months

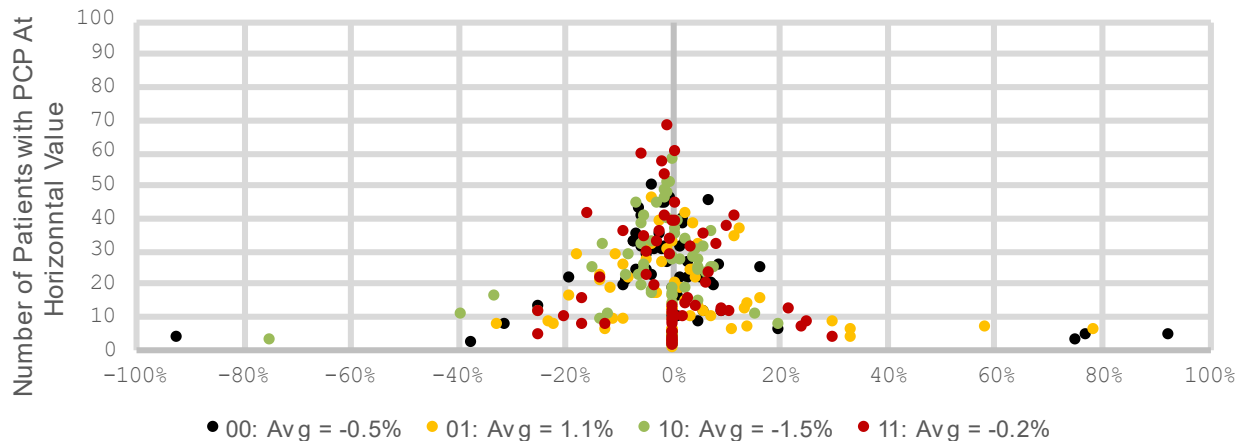

Change in Benzo Use (Less 3Mth Opioid Patients) Over 18 Months

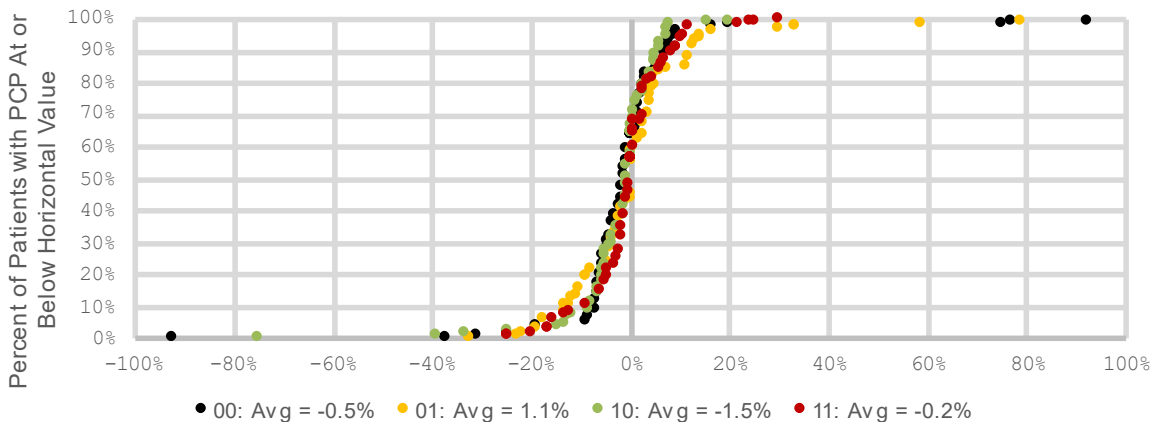

Percent w/ Benzo in Last Quarter  
In-Scope Less than 3 -Mth Opioid Users  
Weighted Average +/- StDev

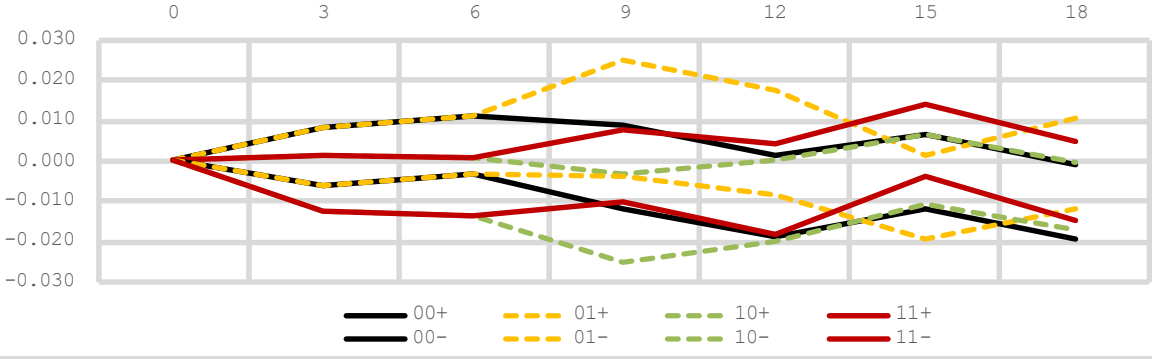

Fitted Fixed Effects- Benzo Use (Less than 3Mth Opioid Patients)

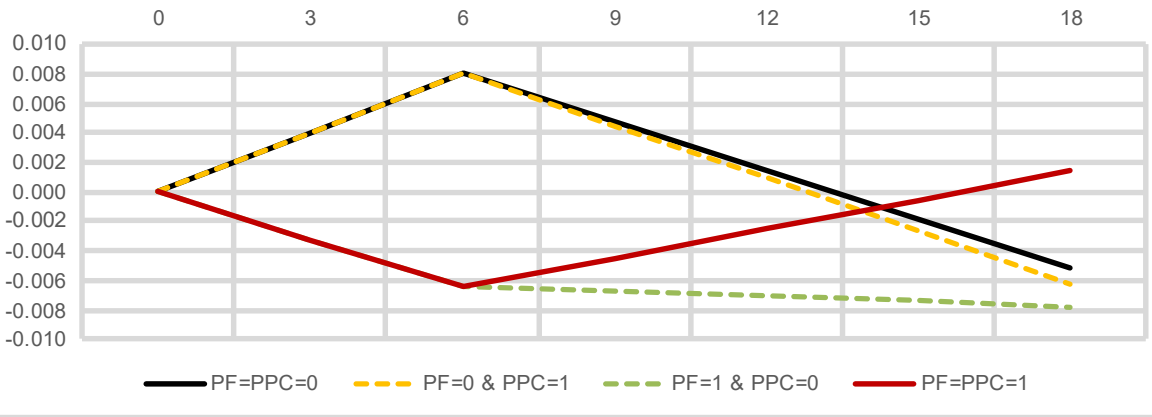

### Benzo Use (Less 3-Mth Opioid Patients)

| Study Month                         | Estimated Fixed Effect Curves |              |              |          | Differences        |                    |                |
|-------------------------------------|-------------------------------|--------------|--------------|----------|--------------------|--------------------|----------------|
|                                     | PF=PPC=0                      | PF=0 & PPC=1 | PF=1 & PPC=0 | PF=PPC=1 | PF=0 & PPC=1 minus | PF=1 & PPC=0 minus | PF=PPC=1 minus |
| 0                                   | 0.000                         | 0.000        | 0.000        | 0.000    | 0.000              | 0.000              | 0.000          |
| 3                                   | 0.004                         | 0.004        | -0.003       | -0.003   | 0.000              | -0.007             | -0.007         |
| 6                                   | 0.008                         | 0.008        | -0.006       | -0.006   | 0.000              | -0.015             | -0.015         |
| 9                                   | 0.005                         | 0.005        | -0.007       | -0.004   | 0.000              | -0.012             | -0.009         |
| 12                                  | 0.001                         | 0.001        | -0.007       | -0.003   | -0.001             | -0.009             | -0.004         |
| 15                                  | -0.002                        | -0.003       | -0.007       | -0.001   | -0.001             | -0.006             | 0.001          |
| 18                                  | -0.005                        | -0.006       | -0.008       | 0.001    | -0.001             | -0.003             | 0.007          |
| <b>Std Dev of Estimated Values</b>  |                               |              |              |          |                    |                    |                |
| 0                                   | 0.000                         | 0.000        | 0.000        | 0.000    | 0.000              | 0.000              | 0.000          |
| 3                                   | 0.003                         | 0.003        | 0.003        | 0.003    | 0.000              | 0.004              | 0.004          |
| 6                                   | 0.006                         | 0.006        | 0.006        | 0.006    | 0.000              | 0.008              | 0.008          |
| 9                                   | 0.006                         | 0.006        | 0.005        | 0.005    | 0.003              | 0.006              | 0.007          |
| 12                                  | 0.006                         | 0.006        | 0.005        | 0.005    | 0.005              | 0.007              | 0.007          |
| 15                                  | 0.006                         | 0.007        | 0.006        | 0.006    | 0.008              | 0.008              | 0.008          |
| 18                                  | 0.007                         | 0.008        | 0.007        | 0.007    | 0.010              | 0.010              | 0.010          |
| <b>t-ratios of Estimated Values</b> |                               |              |              |          |                    |                    |                |
| 0                                   |                               |              |              |          |                    |                    |                |
| 3                                   | 1.26                          | 1.26         | -1.07        | -1.07    |                    | -1.93              | -1.93          |
| 6                                   | 1.26                          | 1.26         | -1.07        | -1.07    |                    | -1.93              | -1.93          |
| 9                                   | 0.85                          | 0.79         | -1.27        | -0.84    | -0.11              | -1.79              | -1.43          |
| 12                                  | 0.27                          | 0.16         | -1.34        | -0.47    | -0.11              | -1.32              | -0.60          |
| 15                                  | -0.30                         | -0.41        | -1.25        | -0.09    | -0.11              | -0.73              | 0.17           |
| 18                                  | -0.70                         | -0.80        | -1.09        | 0.20     | -0.11              | -0.27              | 0.68           |

| Covariance Parameter Estimates |         |          |
|--------------------------------|---------|----------|
| Cov Parm                       | Subject | Estimate |
| Intercept                      | Clinic  | 0.000034 |
| UN(1,1)                        | PCP     | 0.000789 |
| UN(2,1)                        | PCP     | -0.00003 |
| UN(2,2)                        | PCP     | 0.000017 |
| UN(3,1)                        | PCP     | 0.000050 |
| UN(3,2)                        | PCP     | -0.00002 |
| UN(3,3)                        | PCP     | 0.000029 |
| Residual                       |         | 0.06528  |

| Std Dev & Correlation |        |        |        |
|-----------------------|--------|--------|--------|
| Clinic                | 0.0058 |        |        |
| PCP                   | 0.0281 |        |        |
|                       | -25.9% | 0.0041 |        |
|                       | 33.1%  | -90.1% | 0.0054 |
| Residual              | 0.2555 |        |        |

**Solution for Fixed Effects**

| Effect       | System    | Estimate | Standard Error | DF  | t Value | Pr >  t |
|--------------|-----------|----------|----------------|-----|---------|---------|
| System       | Bellin    | 0.05995  | 0.005351       | 786 | 11.20   | <.0001  |
| System       | UW Health | 0.08827  | 0.005032       | 786 | 17.54   | <.0001  |
| clinic_size  |           | 0        | 0              | 786 | Infty   | <.0001  |
| t7           |           | 0.001353 | 0.001077       | 249 | 1.26    | 0.2105  |
| PF_t7        |           | -0.00243 | 0.001257       | 786 | -1.93   | 0.0535  |
| t13          |           | -0.00246 | 0.001554       | 201 | -1.58   | 0.1145  |
| PF_t13       |           | 0.003428 | 0.001926       | 786 | 1.78    | 0.0754  |
| PPC_t13      |           | -0.00009 | 0.000838       | 786 | -0.10   | 0.9176  |
| PFandPPC_t13 |           | 0.000857 | 0.001127       | 786 | 0.76    | 0.4471  |

**Estimates**

| Label                 | Estimate | Standard Error | DF  | t Value | Pr >  t |
|-----------------------|----------|----------------|-----|---------|---------|
| NOINT Chg             | -0.00521 | 0.007328       | 786 | -0.71   | 0.4773  |
| PF Only Chg           | -0.00782 | 0.006806       | 786 | -1.15   | 0.2509  |
| PPC Only Chg          | -0.00625 | 0.007812       | 786 | -0.80   | 0.4238  |
| PF & PPC Chg          | 0.001428 | 0.006962       | 786 | 0.21    | 0.8375  |
| PF Only vs NOINT      | -0.00261 | 0.009426       | 786 | -0.28   | 0.7819  |
| PPC Only vs NOINT     | -0.00104 | 0.01005        | 786 | -0.10   | 0.9176  |
| PF Only vs PPC Only 1 | -0.00157 | 0.009741       | 786 | -0.16   | 0.8720  |
| PF Only vs PPC Only 2 | 0.01301  | 0.01148        | 786 | 1.13    | 0.2575  |
| PF & PPC Interaction  | 0.01029  | 0.01353        | 786 | 0.76    | 0.4471  |
| PF & PPC vs NOINT     | 0.006638 | 0.009580       | 786 | 0.69    | 0.4885  |



### Studentized Residuals for y

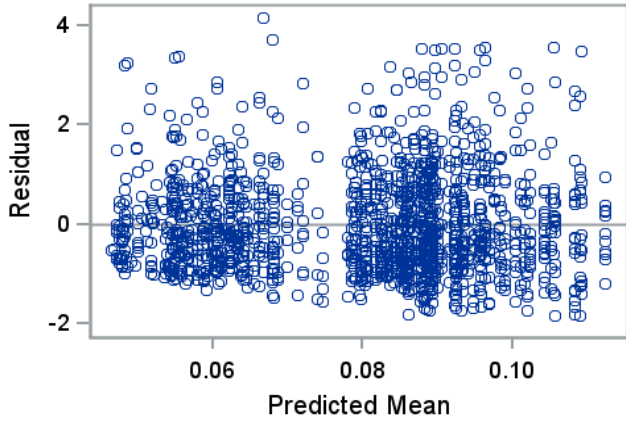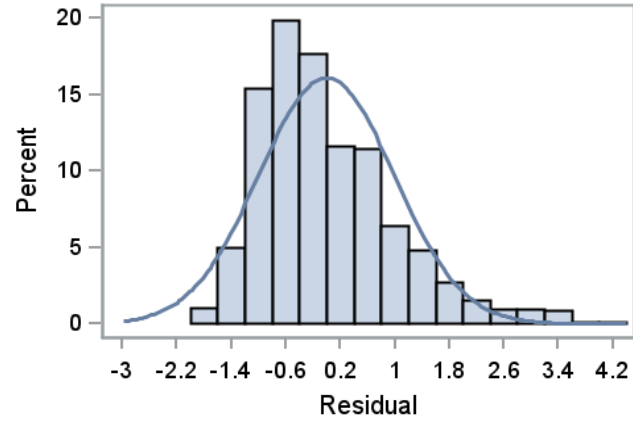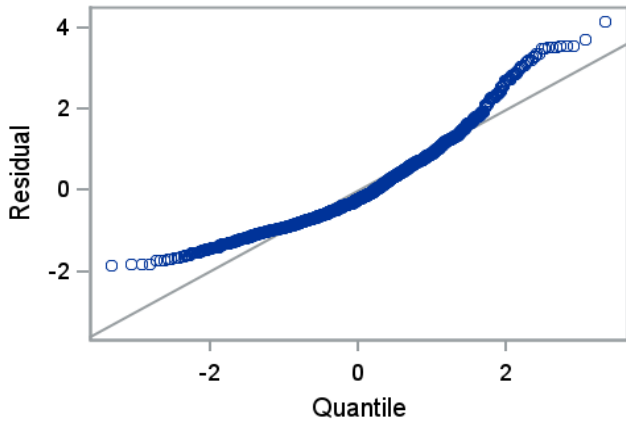

| Residual Statistics |        |
|---------------------|--------|
| Observations        | 1505   |
| Minimum             | -1.85  |
| Mean                | -0.006 |
| Maximum             | 4.1579 |
| Std Dev             | 0.9919 |

  

| Fit Statistics |       |
|----------------|-------|
| Objective      | -3748 |
| AIC            | -3732 |
| AICC           | -3732 |
| BIC            | -3720 |

### Conditional Studentized Residuals for y

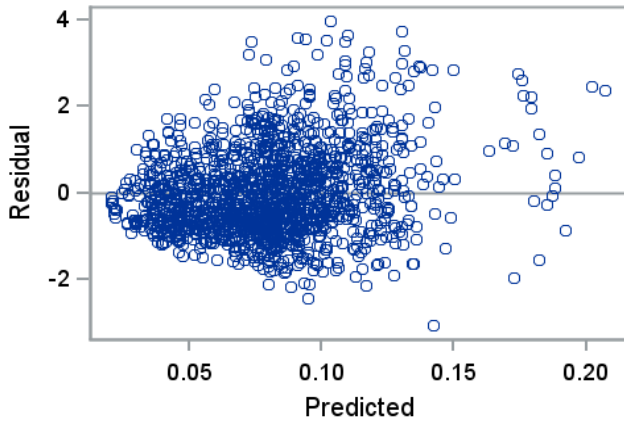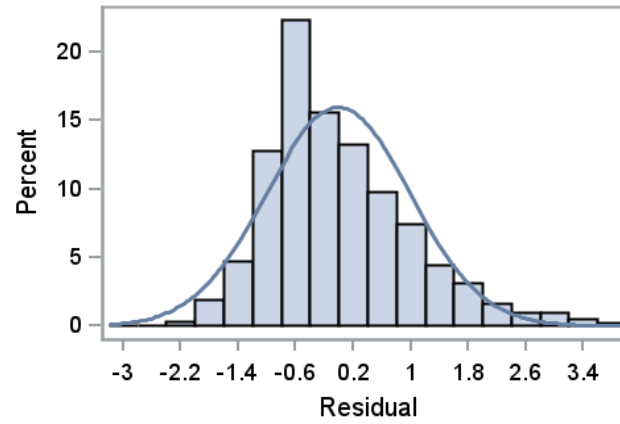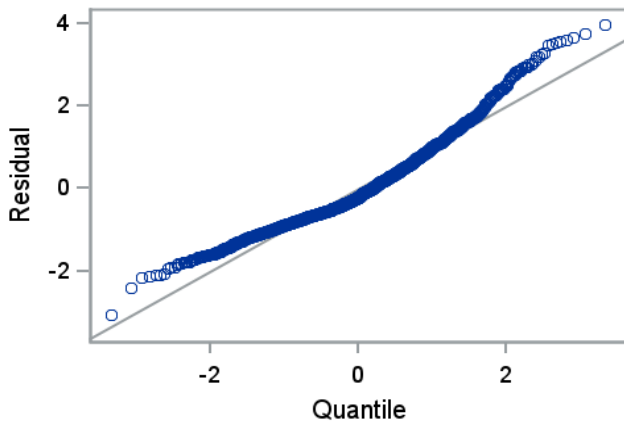

| Residual Statistics |        |
|---------------------|--------|
| Observations        | 1505   |
| Minimum             | -3.064 |
| Mean                | -0.011 |
| Maximum             | 3.9611 |
| Std Dev             | 1.0007 |

  

| Fit Statistics |       |
|----------------|-------|
| Objective      | -3748 |
| AIC            | -3732 |
| AICC           | -3732 |
| BIC            | -3720 |

Appendix C4 – Percent of Opioid Patients with Urine Drug Screen in Last 12 Months (Less than 3-Mth opioid Patients)

Change in Urine Screening (Less 3Mth Opioid Patients) Over 18 Months

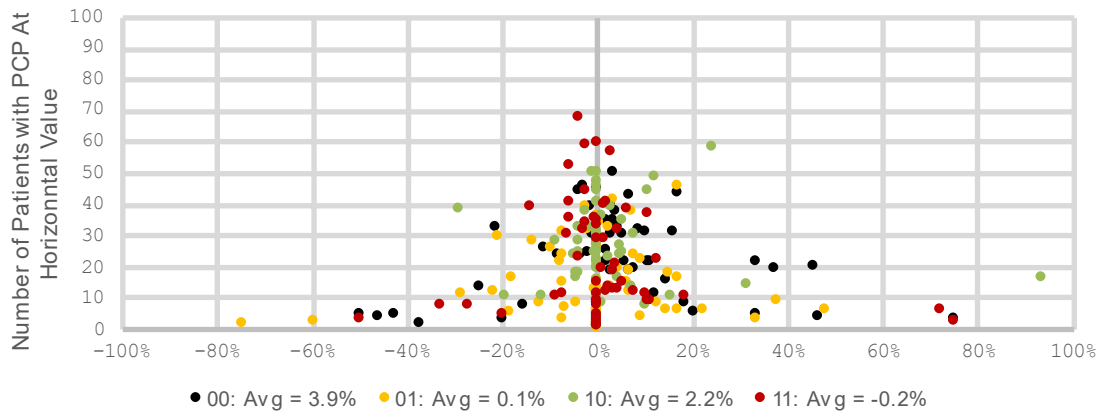

Change in Urine Screening (Less 3Mth Opioid Patients) Over 18 Months

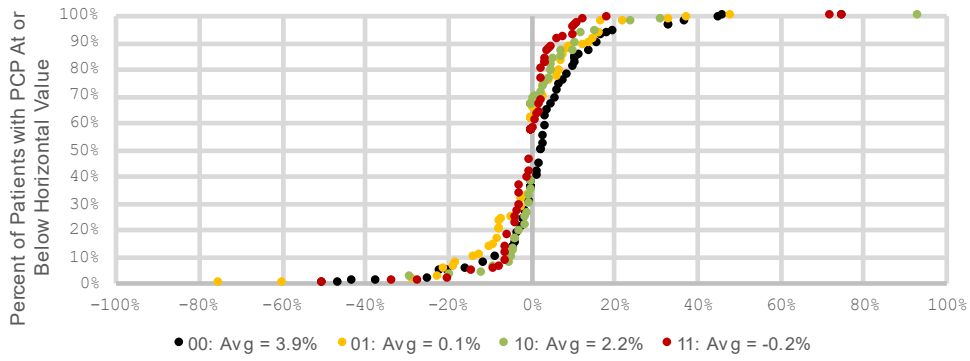

Percent w/ Urine Screen in Last Year  
In-Scope Less than 3 -Mth Opioid Users  
Weighted Average +/- StDev

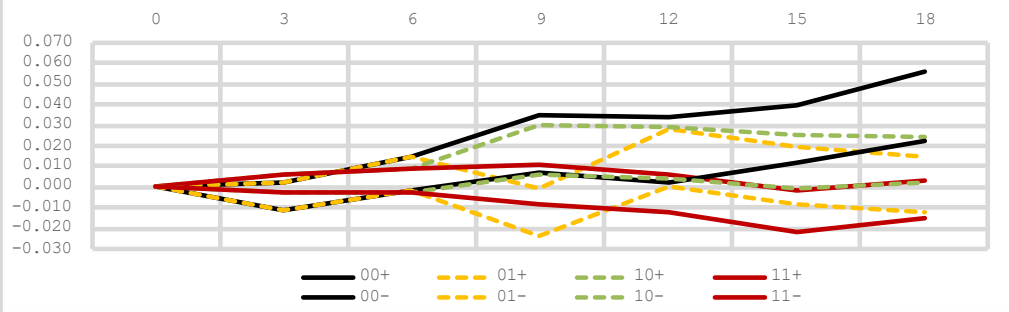

Fitted Fixed Effects- Urine Screening (Less 3Mth Opioid Patients)

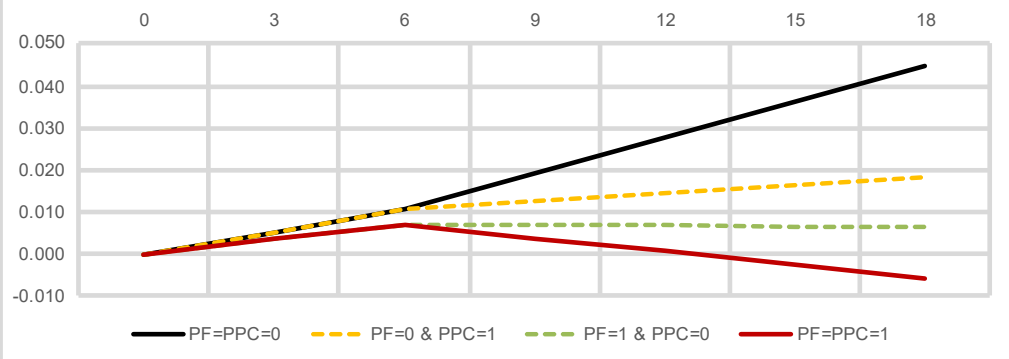

## Urine Screening (Less 3-Mth Opioid Patients)

| Study Month                  | Estimated Fixed Effect Curves |              |              |          | Differences        |                    |                |
|------------------------------|-------------------------------|--------------|--------------|----------|--------------------|--------------------|----------------|
|                              | PF=PPC=0                      | PF=0 & PPC=1 | PF=1 & PPC=0 | PF=PPC=1 | PF=0 & PPC=1 minus | PF=1 & PPC=0 minus | PF=PPC=1 minus |
| 0                            | 0.000                         | 0.000        | 0.000        | 0.000    | 0.000              | 0.000              | 0.000          |
| 3                            | 0.005                         | 0.005        | 0.003        | 0.003    | 0.000              | -0.002             | -0.002         |
| 6                            | 0.010                         | 0.010        | 0.007        | 0.007    | 0.000              | -0.003             | -0.003         |
| 9                            | 0.019                         | 0.012        | 0.007        | 0.004    | -0.007             | -0.012             | -0.015         |
| 12                           | 0.028                         | 0.014        | 0.007        | 0.001    | -0.013             | -0.021             | -0.027         |
| 15                           | 0.036                         | 0.016        | 0.006        | -0.003   | -0.020             | -0.030             | -0.039         |
| 18                           | 0.045                         | 0.018        | 0.006        | -0.006   | -0.026             | -0.039             | -0.051         |
| Std Dev of Estimated Values  |                               |              |              |          |                    |                    |                |
| 0                            | 0.000                         | 0.000        | 0.000        | 0.000    | 0.000              | 0.000              | 0.000          |
| 3                            | 0.004                         | 0.004        | 0.003        | 0.003    | 0.000              | 0.005              | 0.005          |
| 6                            | 0.007                         | 0.007        | 0.007        | 0.007    | 0.000              | 0.009              | 0.009          |
| 9                            | 0.007                         | 0.007        | 0.007        | 0.007    | 0.003              | 0.009              | 0.009          |
| 12                           | 0.008                         | 0.008        | 0.007        | 0.007    | 0.007              | 0.010              | 0.010          |
| 15                           | 0.009                         | 0.009        | 0.009        | 0.009    | 0.010              | 0.012              | 0.012          |
| 18                           | 0.011                         | 0.011        | 0.011        | 0.011    | 0.014              | 0.015              | 0.015          |
| t-ratios of Estimated Values |                               |              |              |          |                    |                    |                |
| 0                            |                               |              |              |          |                    |                    |                |
| 3                            | 1.46                          | 1.46         | 1.04         | 1.04     |                    | -0.37              | -0.37          |
| 6                            | 1.46                          | 1.46         | 1.04         | 1.04     |                    | -0.37              | -0.37          |
| 9                            | 2.71                          | 1.79         | 1.02         | 0.57     | -1.91              | -1.34              | -1.67          |
| 12                           | 3.56                          | 1.88         | 0.89         | 0.08     | -1.91              | -2.05              | -2.64          |
| 15                           | 3.96                          | 1.81         | 0.74         | -0.29    | -1.91              | -2.43              | -3.16          |
| 18                           | 4.09                          | 1.69         | 0.60         | -0.54    | -1.91              | -2.61              | -3.40          |

| Covariance Parameter Estimates |         |          |
|--------------------------------|---------|----------|
| Cov Parm                       | Subject | Estimate |
| Intercept                      | Clinic  | 0.000735 |
| UN(1,1)                        | PCP     | 0.002317 |
| UN(2,1)                        | PCP     | -0.00020 |
| UN(2,2)                        | PCP     | 0.000061 |
| UN(3,1)                        | PCP     | 0.000135 |
| UN(3,2)                        | PCP     | -0.00006 |
| UN(3,3)                        | PCP     | 0.000068 |
| Residual                       |         | 0.04382  |

| Std Dev & Correlation |        |        |        |
|-----------------------|--------|--------|--------|
| Clinic                | 0.0271 |        |        |
| PCP                   | 0.0481 |        |        |
|                       | -53.2% | 0.0078 |        |
|                       | 34.0%  | -93.2% | 0.0082 |
| Residual              | 0.2093 |        |        |

**Solution for Fixed Effects**

| Effect       | System    | Estimate | Standard Error | DF  | t Value | Pr >  t |
|--------------|-----------|----------|----------------|-----|---------|---------|
| System       | Bellin    | 0.06105  | 0.009489       | 786 | 6.43    | <.0001  |
| System       | UW Health | 0.05636  | 0.009531       | 786 | 5.91    | <.0001  |
| clinic_size  |           | 0        | 0              | 786 | -Inf    | <.0001  |
| t7           |           | 0.001744 | 0.001191       | 249 | 1.47    | 0.1442  |
| PF_t7        |           | -0.00058 | 0.001556       | 786 | -0.37   | 0.7107  |
| t13          |           | 0.001122 | 0.001601       | 201 | 0.70    | 0.4845  |
| PF_t13       |           | -0.00234 | 0.002142       | 786 | -1.09   | 0.2747  |
| PPC_t13      |           | -0.00220 | 0.001153       | 786 | -1.91   | 0.0570  |
| PFandPPC_t13 |           | 0.001191 | 0.001598       | 786 | 0.75    | 0.4564  |

**Estimates**

| Label                 | Estimate | Standard Error | DF  | t Value | Pr >  t |
|-----------------------|----------|----------------|-----|---------|---------|
| NOINT Chg             | 0.04486  | 0.01093        | 786 | 4.11    | <.0001  |
| PF Only Chg           | 0.006378 | 0.01047        | 786 | 0.61    | 0.5426  |
| PPC Only Chg          | 0.01849  | 0.01089        | 786 | 1.70    | 0.0899  |
| PF & PPC Chg          | -0.00569 | 0.01069        | 786 | -0.53   | 0.5947  |
| PF Only vs NOINT      | -0.03848 | 0.01471        | 786 | -2.62   | 0.0091  |
| PPC Only vs NOINT     | -0.02636 | 0.01383        | 786 | -1.91   | 0.0570  |
| PF Only vs PPC Only 1 | -0.01212 | 0.01469        | 786 | -0.82   | 0.4097  |
| PF Only vs PPC Only 2 | -0.00865 | 0.01394        | 786 | -0.62   | 0.5350  |
| PF & PPC Interaction  | 0.01429  | 0.01918        | 786 | 0.75    | 0.4564  |
| PF & PPC vs NOINT     | -0.05055 | 0.01488        | 786 | -3.40   | 0.0007  |

### Studentized Residuals for y

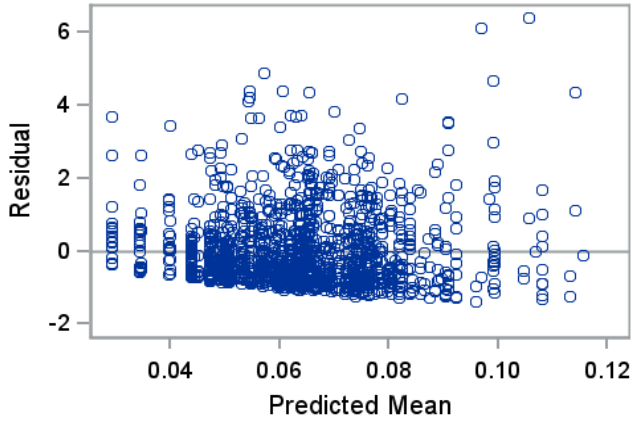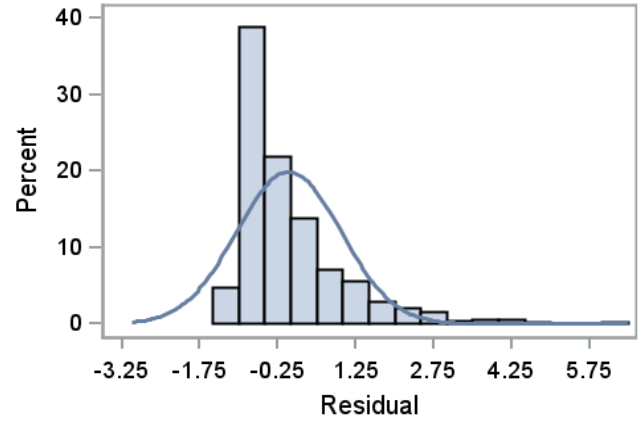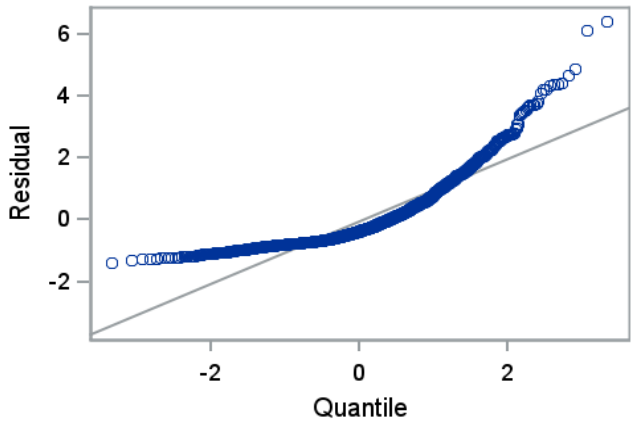

| Residual Statistics |        |
|---------------------|--------|
| Observations        | 1505   |
| Minimum             | -1.403 |
| Mean                | -0.043 |
| Maximum             | 6.4037 |
| Std Dev             | 1.0036 |

  

| Fit Statistics |       |
|----------------|-------|
| Objective      | -3907 |
| AIC            | -3891 |
| AICC           | -3891 |
| BIC            | -3879 |

### Conditional Studentized Residuals for y

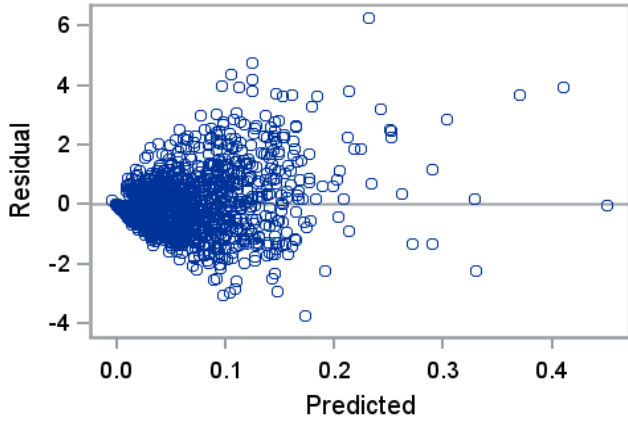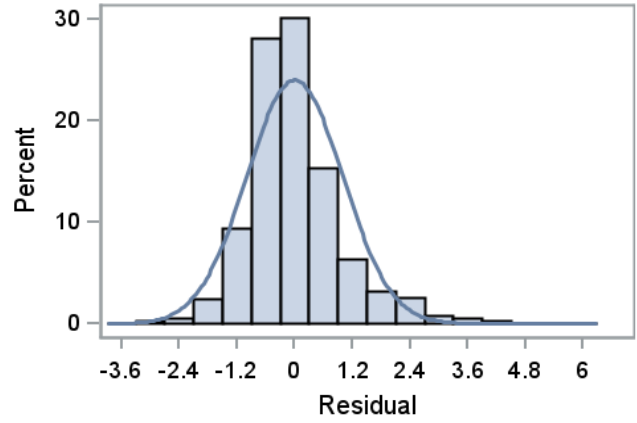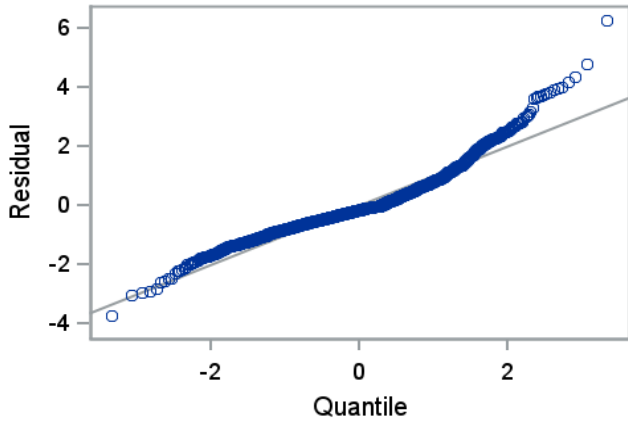

| Residual Statistics |        |
|---------------------|--------|
| Observations        | 1505   |
| Minimum             | -3.712 |
| Mean                | -0.003 |
| Maximum             | 6.2656 |
| Std Dev             | 0.9982 |

  

| Fit Statistics |       |
|----------------|-------|
| Objective      | -3907 |
| AIC            | -3891 |
| AICC           | -3891 |
| BIC            | -3879 |

Appendix C5 – Percent of Opioid Patients with Treatment Agreement in Last 12 Months (Less than 3-Mth Opioid Patients)



**Change in Treatment Agreements (Less Than 3-Mth Opioid Patients) Over 18 Months**

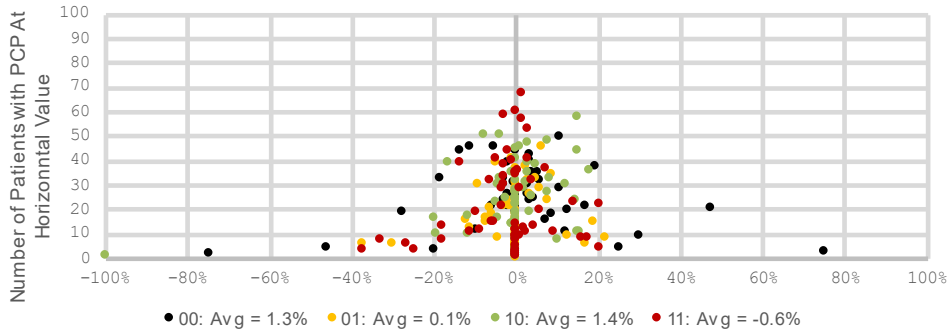

**Change in Treatment Agreements (Less Than 3-Mth Opioid Patients) Over 18 Months**

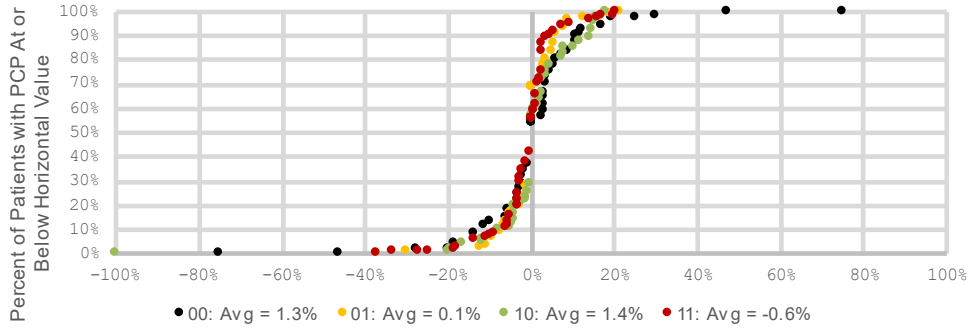

**Percent w/ Treatment Agreement in Last Year  
In-Scope Less than 3 -Mth Opioid Users  
Weighted Average +/- StDev**

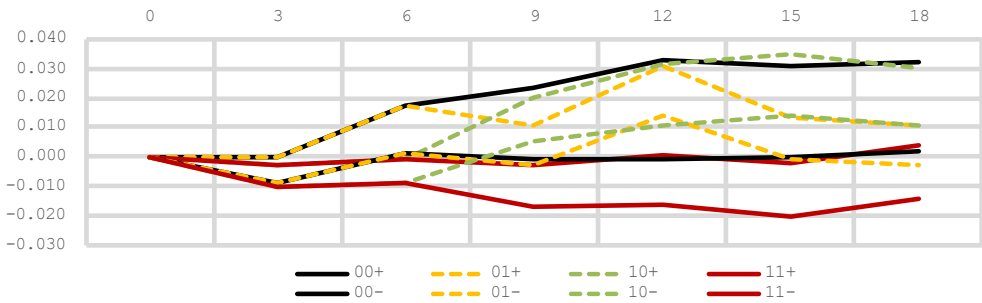

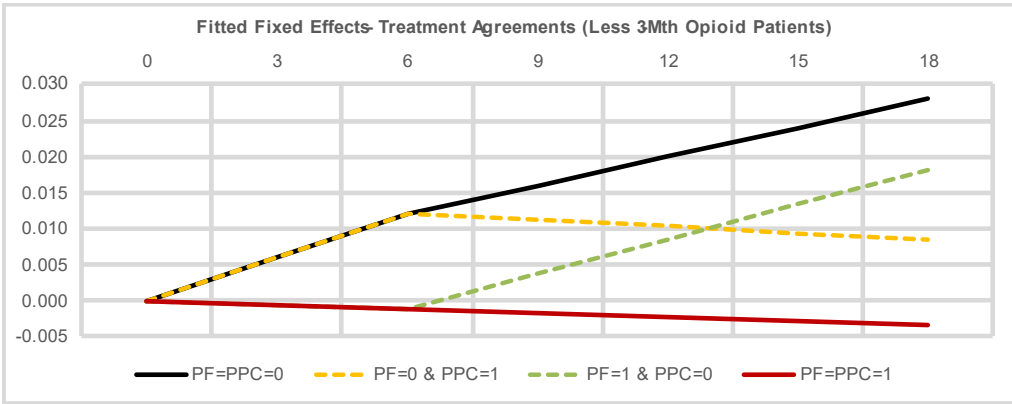

| Treatment Agreements (Less 3-Mth Opioid Patients) |                               |              |              |          |              |              |                |
|---------------------------------------------------|-------------------------------|--------------|--------------|----------|--------------|--------------|----------------|
| Study Month                                       | Estimated Fixed Effect Curves |              |              |          | Differences  |              |                |
|                                                   | PF=PPC=0                      | PF=0 & PPC=1 | PF=1 & PPC=0 | PF=PPC=1 | PF=0 & PPC=1 | PF=1 & PPC=0 | PF=PPC=1 minus |
| 0                                                 | 0.000                         | 0.000        | 0.000        | 0.000    | 0.000        | 0.000        | 0.000          |
| 3                                                 | 0.006                         | 0.006        | -0.001       | -0.001   | 0.000        | -0.007       | -0.007         |
| 6                                                 | 0.012                         | 0.012        | -0.001       | -0.001   | 0.000        | -0.013       | -0.013         |
| 9                                                 | 0.016                         | 0.011        | 0.004        | -0.002   | -0.005       | -0.012       | -0.018         |
| 12                                                | 0.020                         | 0.010        | 0.009        | -0.002   | -0.010       | -0.011       | -0.022         |
| 15                                                | 0.024                         | 0.009        | 0.013        | -0.003   | -0.015       | -0.011       | -0.027         |
| 18                                                | 0.028                         | 0.009        | 0.018        | -0.003   | -0.019       | -0.010       | -0.031         |
| Std Dev of Estimated Values                       |                               |              |              |          |              |              |                |
| 0                                                 | 0.000                         | 0.000        | 0.000        | 0.000    | 0.000        | 0.000        | 0.000          |
| 3                                                 | 0.003                         | 0.003        | 0.003        | 0.003    | 0.000        | 0.004        | 0.004          |
| 6                                                 | 0.006                         | 0.006        | 0.006        | 0.006    | 0.000        | 0.008        | 0.008          |
| 9                                                 | 0.006                         | 0.006        | 0.006        | 0.006    | 0.003        | 0.008        | 0.008          |
| 12                                                | 0.007                         | 0.007        | 0.007        | 0.007    | 0.007        | 0.010        | 0.010          |
| 15                                                | 0.009                         | 0.009        | 0.009        | 0.009    | 0.010        | 0.012        | 0.012          |
| 18                                                | 0.011                         | 0.011        | 0.011        | 0.011    | 0.014        | 0.015        | 0.015          |
| t-ratios of Estimated Values                      |                               |              |              |          |              |              |                |
| 0                                                 |                               |              |              |          |              |              |                |
| 3                                                 | 1.90                          | 1.90         | -0.20        | -0.20    |              | -1.60        | -1.60          |
| 6                                                 | 1.90                          | 1.90         | -0.20        | -0.20    |              | -1.60        | -1.60          |
| 9                                                 | 2.52                          | 1.77         | 0.60         | -0.29    | -1.42        | -1.49        | -2.14          |
| 12                                                | 2.73                          | 1.43         | 1.21         | -0.32    | -1.42        | -1.19        | -2.31          |
| 15                                                | 2.70                          | 1.07         | 1.55         | -0.33    | -1.42        | -0.90        | -2.25          |
| 18                                                | 2.59                          | 0.80         | 1.74         | -0.32    | -1.42        | -0.67        | -2.14          |

| Covariance Parameter Estimates |         |          |
|--------------------------------|---------|----------|
| Cov Parm                       | Subject | Estimate |
| Intercept                      | Clinic  | 0.000492 |
| UN(1,1)                        | PCP     | 0.002421 |
| UN(2,1)                        | PCP     | -0.00014 |
| UN(2,2)                        | PCP     | 0.000046 |
| UN(3,1)                        | PCP     | 0.000044 |
| UN(3,2)                        | PCP     | -0.00004 |
| UN(3,3)                        | PCP     | 0.000053 |
| Residual                       |         | 0.03334  |

| Std Dev & Correlation |        |        |        |
|-----------------------|--------|--------|--------|
| Clinic                | 0.0222 |        |        |
| PCP                   | 0.0492 |        |        |
|                       | -42.0% | 0.0068 |        |
|                       | 12.3%  | -81.0% | 0.0073 |
| Residual              | 0.1826 |        |        |

**Solution for Fixed Effects**

| Effect       | System    | Estimate | Standard Error | DF  | t Value | Pr >  t |
|--------------|-----------|----------|----------------|-----|---------|---------|
| System       | Bellin    | 0.08513  | 0.008561       | 786 | 9.94    | <.0001  |
| System       | UW Health | 0.02178  | 0.008326       | 786 | 2.62    | 0.0091  |
| clinic_size  |           | 0        | 0              | 786 | -Inf    | <.0001  |
| t7           |           | 0.001989 | 0.001044       | 249 | 1.90    | 0.0580  |
| PF_t7        |           | -0.00219 | 0.001370       | 786 | -1.60   | 0.1096  |
| t13          |           | -0.00065 | 0.001442       | 201 | -0.45   | 0.6530  |
| PF_t13       |           | 0.002470 | 0.001945       | 786 | 1.27    | 0.2046  |
| PPC_t13      |           | -0.00162 | 0.001143       | 786 | -1.42   | 0.1560  |
| PFandPPC_t13 |           | -0.00018 | 0.001591       | 786 | -0.11   | 0.9123  |

| Estimates             |          |                |     |         |         |
|-----------------------|----------|----------------|-----|---------|---------|
| Label                 | Estimate | Standard Error | DF  | t Value | Pr >  t |
| NOINT Chg             | 0.02801  | 0.01077        | 786 | 2.60    | 0.0095  |
| PF Only Chg           | 0.01816  | 0.01037        | 786 | 1.75    | 0.0805  |
| PPC Only Chg          | 0.008536 | 0.01062        | 786 | 0.80    | 0.4219  |
| PF & PPC Chg          | -0.00342 | 0.01053        | 786 | -0.32   | 0.7458  |
| PF Only vs NOINT      | -0.00985 | 0.01450        | 786 | -0.68   | 0.4973  |
| PPC Only vs NOINT     | -0.01947 | 0.01371        | 786 | -1.42   | 0.1560  |
| PF Only vs PPC Only 1 | 0.009621 | 0.01441        | 786 | 0.67    | 0.5045  |
| PF Only vs PPC Only 2 | 0.02278  | 0.01372        | 786 | 1.66    | 0.0973  |
| PF & PPC Interaction  | -0.00210 | 0.01909        | 786 | -0.11   | 0.9123  |
| PF & PPC vs NOINT     | -0.03142 | 0.01463        | 786 | -2.15   | 0.0320  |

### Studentized Residuals for y

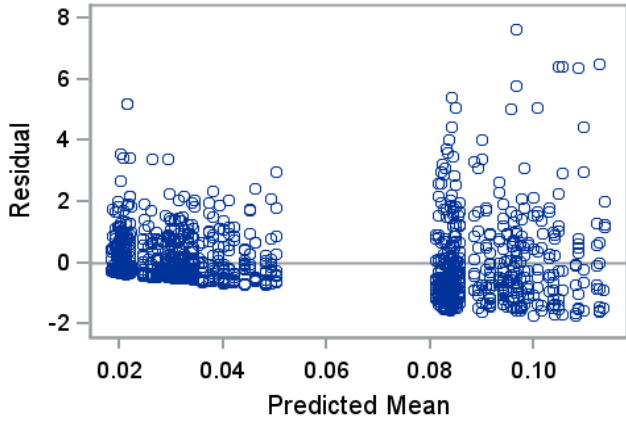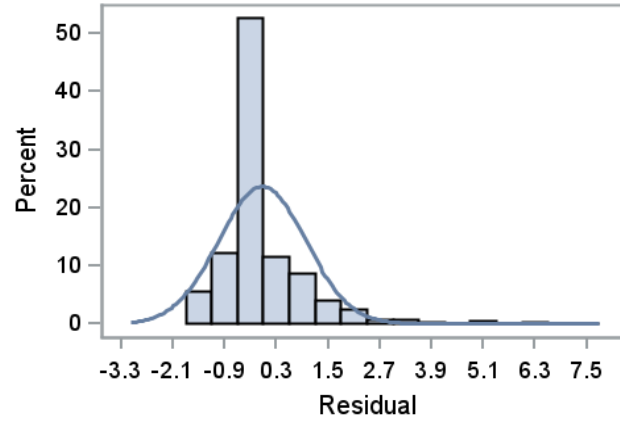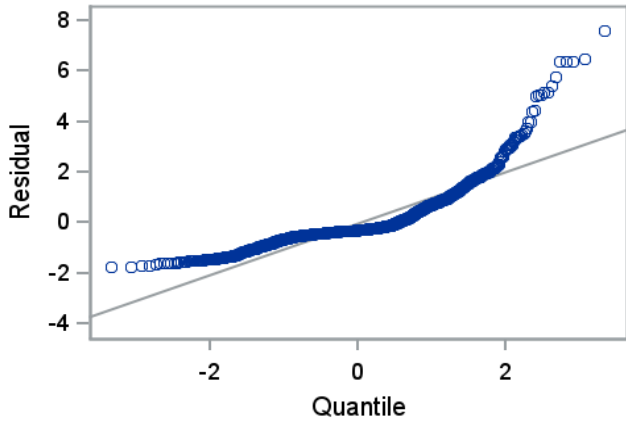

| Residual Statistics |        |
|---------------------|--------|
| Observations        | 1505   |
| Minimum             | -1.745 |
| Mean                | -0.032 |
| Maximum             | 7.6024 |
| Std Dev             | 1.0129 |

  

| Fit Statistics |       |
|----------------|-------|
| Objective      | -4199 |
| AIC            | -4183 |
| AICC           | -4183 |
| BIC            | -4171 |

### Conditional Studentized Residuals for y

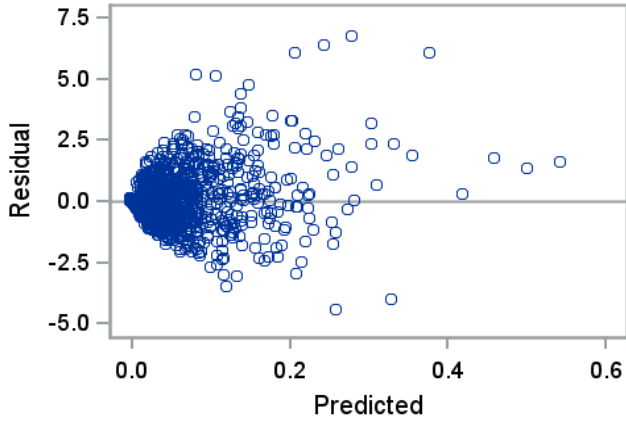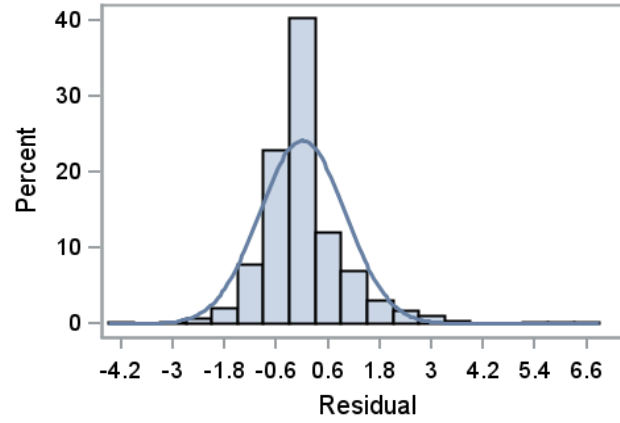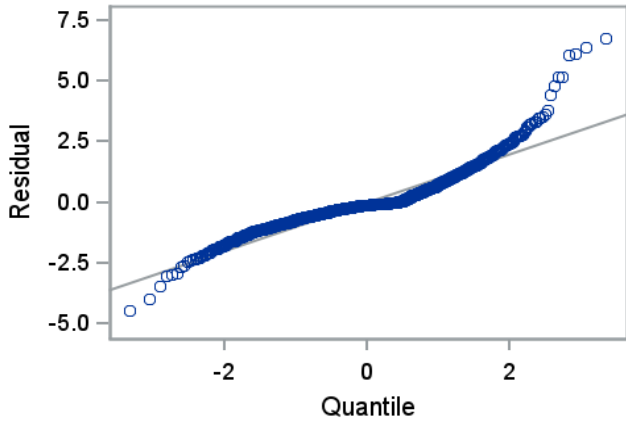

| Residual Statistics |        |
|---------------------|--------|
| Observations        | 1505   |
| Minimum             | -4.434 |
| Mean                | 0.0018 |
| Maximum             | 6.7723 |
| Std Dev             | 0.9918 |

  

| Fit Statistics |       |
|----------------|-------|
| Objective      | -4199 |
| AIC            | -4183 |
| AICC           | -4183 |
| BIC            | -4171 |

Appendix C6 – Percent of Opioid Patients with PHQ-9 Depression Screen in Last 12 Months (Less than 3-Mth Opioid Patients)

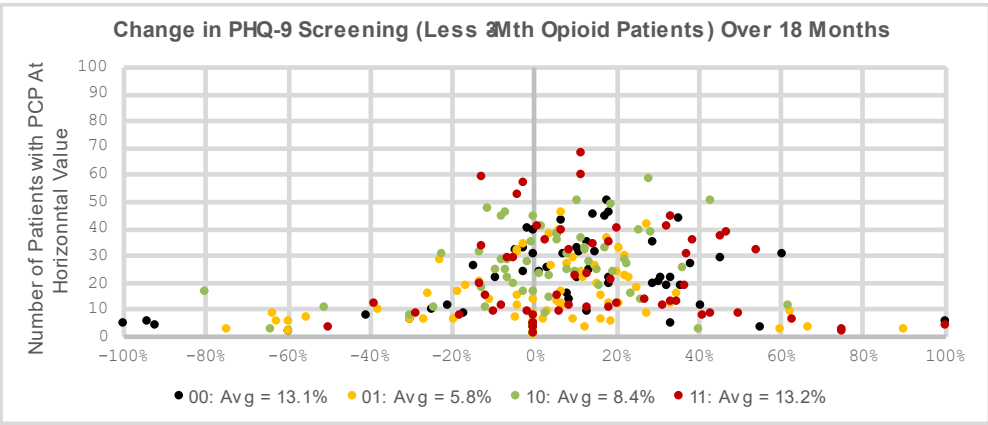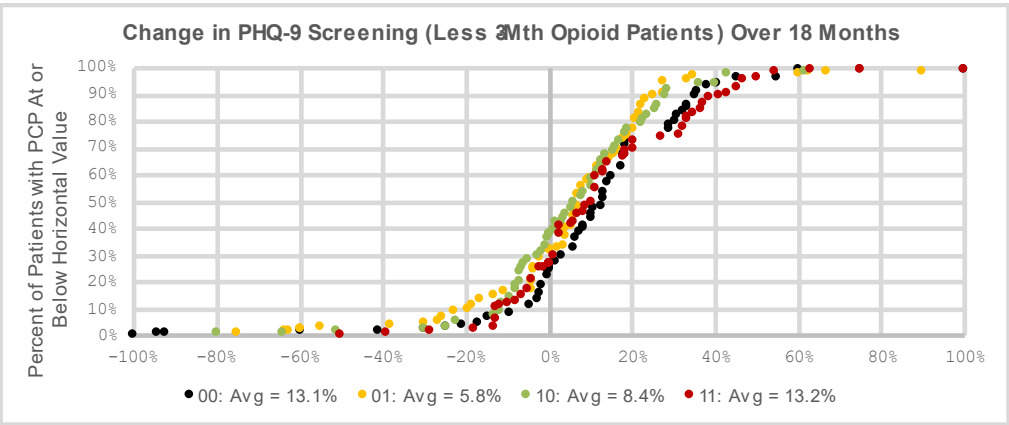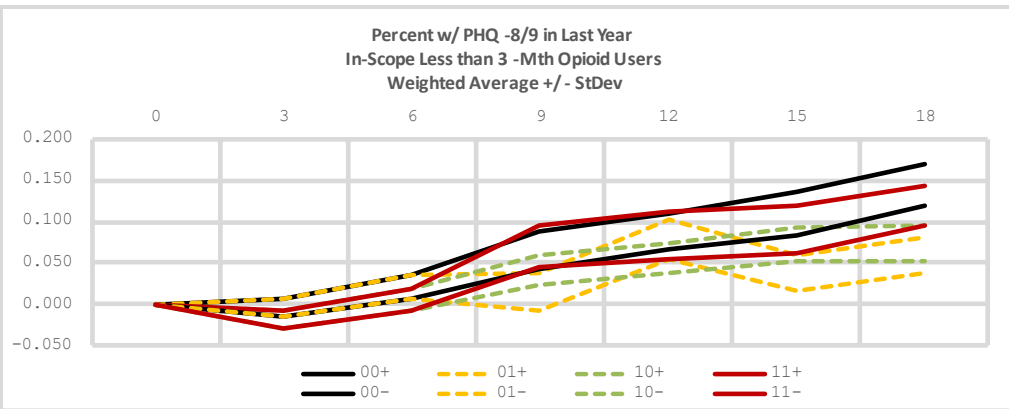

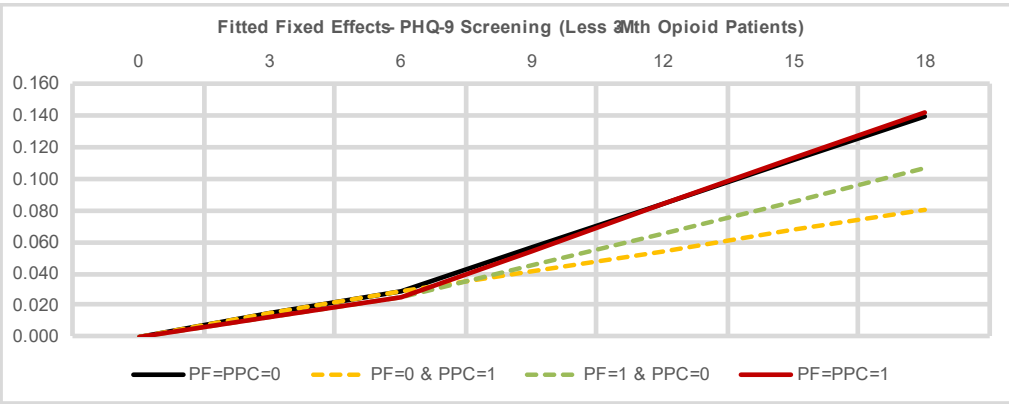



### PHQ-9 Screening (Less 3-Mth Opioid Patients)

| Study Month                         | Estimated Fixed Effect Curves |              |              |          | Differences  |              |                |
|-------------------------------------|-------------------------------|--------------|--------------|----------|--------------|--------------|----------------|
|                                     | PF=PPC=0                      | PF=0 & PPC=1 | PF=1 & PPC=0 | PF=PPC=1 | PF=0 & PPC=1 | PF=1 & PPC=0 | PF=PPC=1 minus |
| 0                                   | 0.000                         | 0.000        | 0.000        | 0.000    | 0.000        | 0.000        | 0.000          |
| 3                                   | 0.014                         | 0.014        | 0.012        | 0.012    | 0.000        | -0.002       | -0.002         |
| 6                                   | 0.028                         | 0.028        | 0.025        | 0.025    | 0.000        | -0.004       | -0.004         |
| 9                                   | 0.056                         | 0.041        | 0.045        | 0.054    | -0.015       | -0.011       | -0.002         |
| 12                                  | 0.084                         | 0.054        | 0.066        | 0.084    | -0.030       | -0.019       | 0.000          |
| 15                                  | 0.112                         | 0.067        | 0.086        | 0.113    | -0.045       | -0.026       | 0.001          |
| 18                                  | 0.140                         | 0.080        | 0.106        | 0.143    | -0.059       | -0.033       | 0.003          |
| <b>Std Dev of Estimated Values</b>  |                               |              |              |          |              |              |                |
| 0                                   | 0.000                         | 0.000        | 0.000        | 0.000    | 0.000        | 0.000        | 0.000          |
| 3                                   | 0.007                         | 0.007        | 0.006        | 0.006    | 0.000        | 0.009        | 0.009          |
| 6                                   | 0.014                         | 0.014        | 0.013        | 0.013    | 0.000        | 0.018        | 0.018          |
| 9                                   | 0.014                         | 0.014        | 0.014        | 0.013    | 0.007        | 0.019        | 0.019          |
| 12                                  | 0.015                         | 0.015        | 0.016        | 0.016    | 0.013        | 0.022        | 0.022          |
| 15                                  | 0.018                         | 0.018        | 0.019        | 0.020    | 0.020        | 0.026        | 0.026          |
| 18                                  | 0.022                         | 0.022        | 0.023        | 0.024    | 0.026        | 0.031        | 0.032          |
| <b>t-ratios of Estimated Values</b> |                               |              |              |          |              |              |                |
| 0                                   |                               |              |              |          |              |              |                |
| 3                                   | 2.08                          | 2.08         | 1.93         | 1.93     |              | -0.21        | -0.21          |
| 6                                   | 2.08                          | 2.08         | 1.93         | 1.93     |              | -0.21        | -0.21          |
| 9                                   | 4.07                          | 3.03         | 3.34         | 4.02     | -2.25        | -0.59        | -0.11          |
| 12                                  | 5.44                          | 3.57         | 4.13         | 5.25     | -2.25        | -0.86        | -0.02          |
| 15                                  | 6.17                          | 3.74         | 4.45         | 5.80     | -2.25        | -0.99        | 0.05           |
| 18                                  | 6.49                          | 3.74         | 4.56         | 6.02     | -2.25        | -1.06        | 0.10           |

| Covariance Parameter Estimates |         |          | Std Dev & Correlation |        |        |
|--------------------------------|---------|----------|-----------------------|--------|--------|
| Cov Parm                       | Subject | Estimate |                       |        |        |
| Intercept                      | Clinic  | 0.007275 | Clinic                | 0.0853 |        |
| UN(1,1)                        | PCP     | 0.009080 |                       |        |        |
| UN(2,1)                        | PCP     | -0.00071 |                       |        |        |
| UN(2,2)                        | PCP     | 0.000189 | PCP                   | 0.0953 |        |
| UN(3,1)                        | PCP     | 0.000550 |                       | -54.2% | 0.0137 |
| UN(3,2)                        | PCP     | -0.00015 |                       | 47.1%  | -89.1% |
| UN(3,3)                        | PCP     | 0.000150 |                       |        | 0.0122 |
| Residual                       |         | 0.1681   | Residual              | 0.4100 |        |

| Solution for Fixed Effects |           |          |                |     |         |         |
|----------------------------|-----------|----------|----------------|-----|---------|---------|
| Effect                     | System    | Estimate | Standard Error | DF  | t Value | Pr >  t |
| System                     | Bellin    | 0.2964   | 0.02536        | 786 | 11.68   | <.0001  |
| System                     | UW Health | 0.1947   | 0.02676        | 786 | 7.28    | <.0001  |
| clinic_size                |           | 0        | 0              | 786 | -0.55   | 0.5803  |
| t7                         |           | 0.004743 | 0.002284       | 249 | 2.08    | 0.0389  |
| PF_t7                      |           | -0.00063 | 0.003043       | 786 | -0.21   | 0.8373  |
| t13                        |           | 0.004535 | 0.002941       | 201 | 1.54    | 0.1247  |
| PF_t13                     |           | -0.00183 | 0.003950       | 786 | -0.46   | 0.6433  |
| PPC_t13                    |           | -0.00495 | 0.002203       | 786 | -2.25   | 0.0250  |
| PFandPPC_t13               |           | 0.007976 | 0.003035       | 786 | 2.63    | 0.0087  |

| <b>Estimates</b>                |                 |                       |           |                |                    |
|---------------------------------|-----------------|-----------------------|-----------|----------------|--------------------|
| <b>Label</b>                    | <b>Estimate</b> | <b>Standard Error</b> | <b>DF</b> | <b>t Value</b> | <b>Pr &gt;  t </b> |
| <b>NOINT Chg</b>                | 0.1398          | 0.02150               | 786       | 6.50           | <.0001             |
| <b>PF Only Chg</b>              | 0.1066          | 0.02049               | 786       | 5.20           | <.0001             |
| <b>PPC Only Chg</b>             | 0.08042         | 0.02148               | 786       | 3.74           | 0.0002             |
| <b>PF &amp; PPC Chg</b>         | 0.1429          | 0.02086               | 786       | 6.85           | <.0001             |
| <b>PF Only vs NOINT</b>         | -0.03321        | 0.02933               | 786       | -1.13          | 0.2579             |
| <b>PPC Only vs NOINT</b>        | -0.05937        | 0.02643               | 786       | -2.25          | 0.0250             |
| <b>PF Only vs PPC Only 1</b>    | 0.02616         | 0.02932               | 786       | 0.89           | 0.3726             |
| <b>PF Only vs PPC Only 2</b>    | 0.02991         | 0.02606               | 786       | 1.15           | 0.2515             |
| <b>PF &amp; PPC Interaction</b> | 0.09571         | 0.03642               | 786       | 2.63           | 0.0087             |
| <b>PF &amp; PPC vs NOINT</b>    | 0.003133        | 0.02959               | 786       | 0.11           | 0.9157             |

### Studentized Residuals for y

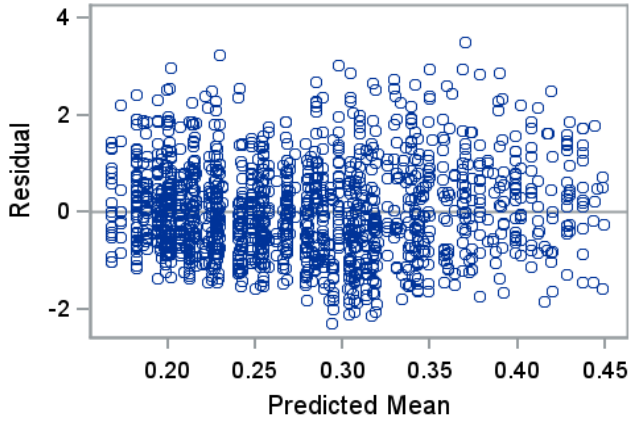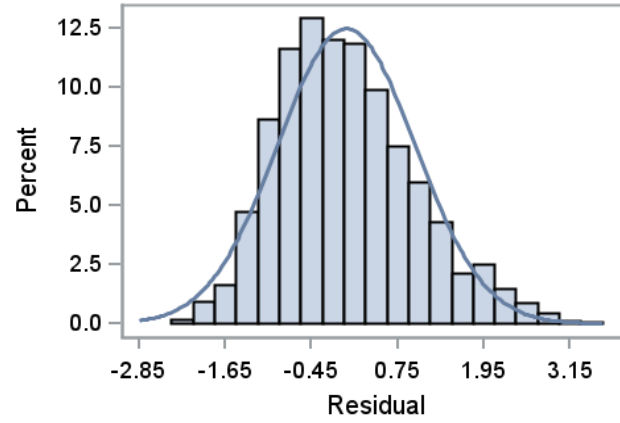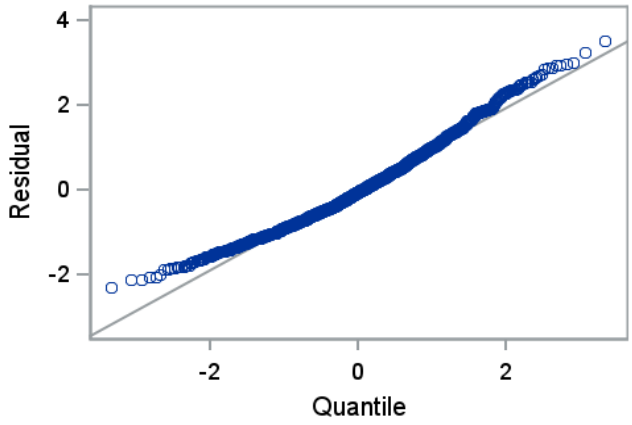

| Residual Statistics |        |
|---------------------|--------|
| Observations        | 1505   |
| Minimum             | -2.308 |
| Mean                | 0.0309 |
| Maximum             | 3.5081 |
| Std Dev             | 0.9575 |

  

| Fit Statistics |       |
|----------------|-------|
| Objective      | -1891 |
| AIC            | -1875 |
| AICC           | -1875 |
| BIC            | -1863 |

### Conditional Studentized Residuals for y

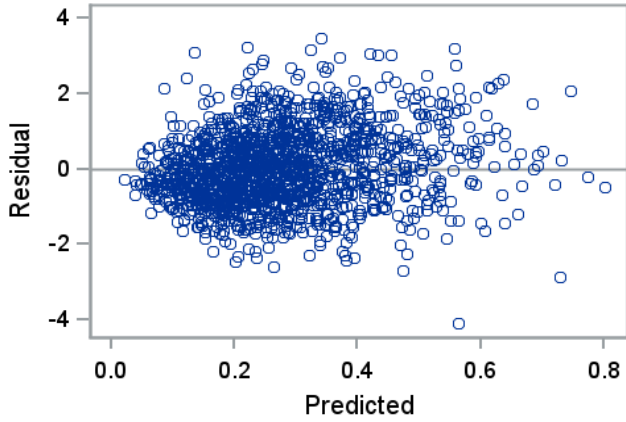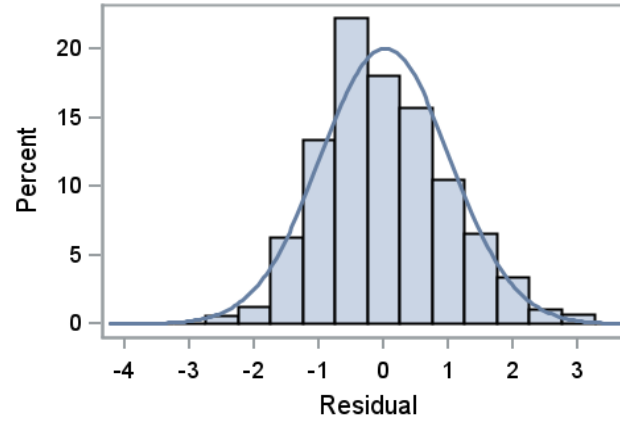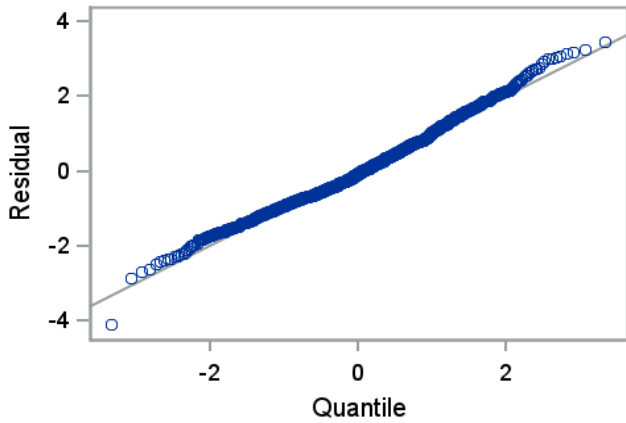

| Residual Statistics |        |
|---------------------|--------|
| Observations        | 1505   |
| Minimum             | -4.099 |
| Mean                | 0.0164 |
| Maximum             | 3.4461 |
| Std Dev             | 0.9945 |

  

| Fit Statistics |       |
|----------------|-------|
| Objective      | -1891 |
| AIC            | -1875 |
| AICC           | -1875 |
| BIC            | -1863 |

Appendix C7 – Percent of Opioid Patients with PEG-3 Pain Screen in Last 12 Months (Less than 3-Mth Opioid Patients)

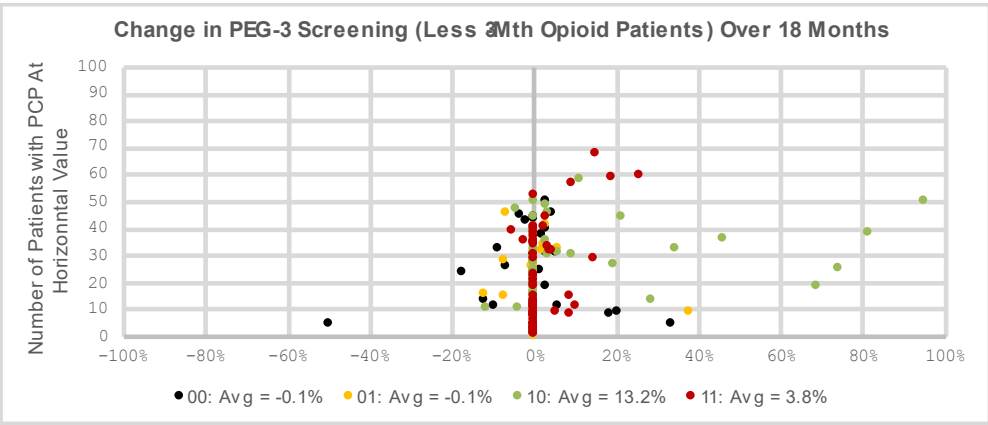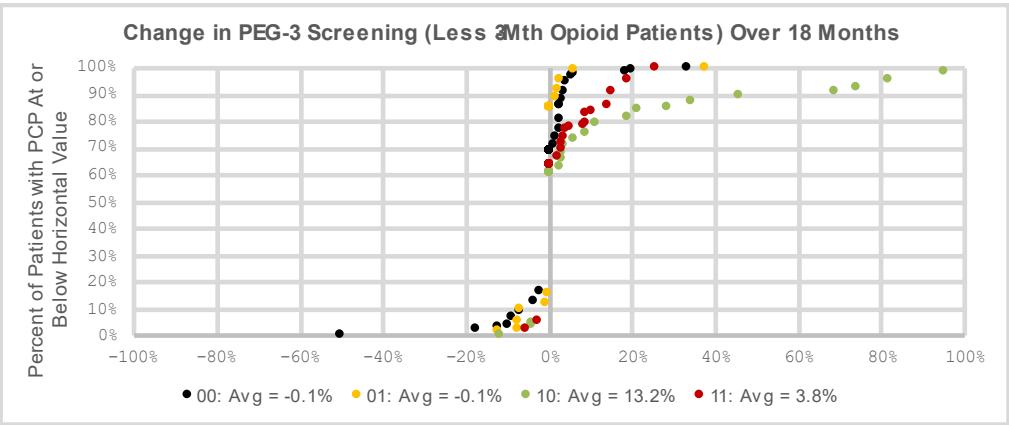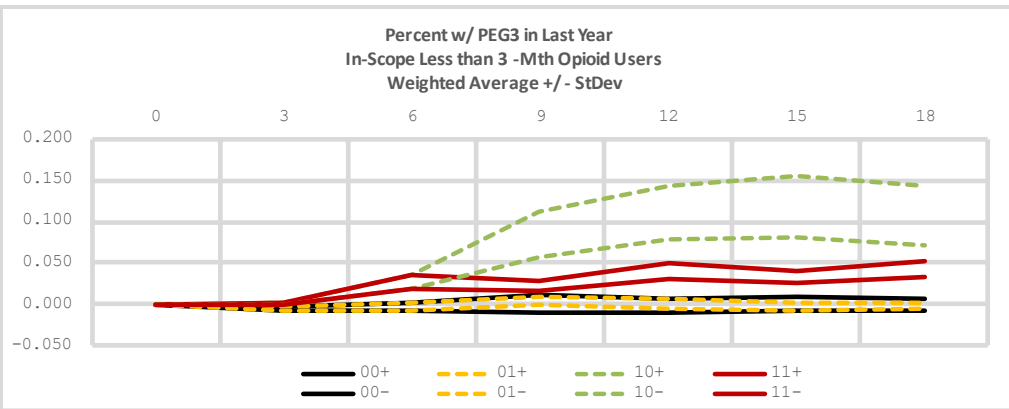

Fitted Fixed Effects- PEG-3 Screening (Less 3Mth Opioid Patients)

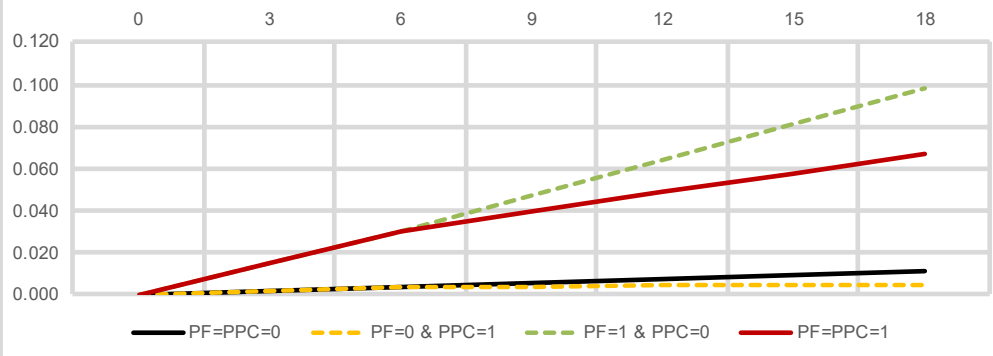

## PEG-3 Screening (Less 3-Mth Opioid Patients)

| Study Month                         | Estimated Fixed Effect Curves |              |              |          | Differences  |              |                |
|-------------------------------------|-------------------------------|--------------|--------------|----------|--------------|--------------|----------------|
|                                     | PF=PPC=0                      | PF=0 & PPC=1 | PF=1 & PPC=0 | PF=PPC=1 | PF=0 & PPC=1 | PF=1 & PPC=0 | PF=PPC=1 minus |
| 0                                   | 0.000                         | 0.000        | 0.000        | 0.000    | 0.000        | 0.000        | 0.000          |
| 3                                   | 0.002                         | 0.002        | 0.015        | 0.015    | 0.000        | 0.013        | 0.013          |
| 6                                   | 0.004                         | 0.004        | 0.030        | 0.030    | 0.000        | 0.027        | 0.027          |
| 9                                   | 0.006                         | 0.004        | 0.047        | 0.039    | -0.002       | 0.042        | 0.034          |
| 12                                  | 0.008                         | 0.004        | 0.064        | 0.049    | -0.004       | 0.057        | 0.041          |
| 15                                  | 0.009                         | 0.004        | 0.081        | 0.058    | -0.005       | 0.072        | 0.048          |
| 18                                  | 0.011                         | 0.004        | 0.098        | 0.067    | -0.007       | 0.087        | 0.056          |
| <b>Std Dev of Estimated Values</b>  |                               |              |              |          |              |              |                |
| 0                                   | 0.000                         | 0.000        | 0.000        | 0.000    | 0.000        | 0.000        | 0.000          |
| 3                                   | 0.004                         | 0.004        | 0.004        | 0.004    | 0.000        | 0.005        | 0.005          |
| 6                                   | 0.008                         | 0.008        | 0.008        | 0.008    | 0.000        | 0.011        | 0.011          |
| 9                                   | 0.010                         | 0.010        | 0.010        | 0.010    | 0.004        | 0.013        | 0.013          |
| 12                                  | 0.012                         | 0.012        | 0.012        | 0.012    | 0.009        | 0.017        | 0.016          |
| 15                                  | 0.015                         | 0.015        | 0.015        | 0.014    | 0.013        | 0.020        | 0.020          |
| 18                                  | 0.018                         | 0.017        | 0.018        | 0.017    | 0.018        | 0.024        | 0.024          |
| <b>t-ratios of Estimated Values</b> |                               |              |              |          |              |              |                |
| 0                                   |                               |              |              |          |              |              |                |
| 3                                   | 0.47                          | 0.47         | 3.87         | 3.87     |              | 2.48         | 2.48           |
| 6                                   | 0.47                          | 0.47         | 3.87         | 3.87     |              | 2.48         | 2.48           |
| 9                                   | 0.58                          | 0.40         | 4.91         | 4.15     | -0.40        | 3.16         | 2.58           |
| 12                                  | 0.62                          | 0.34         | 5.35         | 4.11     | -0.40        | 3.43         | 2.50           |
| 15                                  | 0.63                          | 0.28         | 5.53         | 3.99     | -0.40        | 3.52         | 2.38           |
| 18                                  | 0.63                          | 0.24         | 5.59         | 3.86     | -0.40        | 3.54         | 2.28           |

| Covariance Parameter Estimates |         |          |
|--------------------------------|---------|----------|
| Cov Parm                       | Subject | Estimate |
| Intercept                      | Clinic  | 0.000232 |
| UN(1,1)                        | PCP     | 0.000566 |
| UN(2,1)                        | PCP     | -0.00014 |
| UN(2,2)                        | PCP     | 0.000155 |
| UN(3,1)                        | PCP     | 0.000036 |
| UN(3,2)                        | PCP     | -0.00008 |
| UN(3,3)                        | PCP     | 0.000055 |
| Residual                       |         | 0.02478  |

| Std Dev & Correlation |        |        |        |
|-----------------------|--------|--------|--------|
| Clinic                | 0.0152 |        |        |
| PCP                   | 0.0238 |        |        |
|                       | -47.3% | 0.0124 |        |
|                       | 20.4%  | -86.6% | 0.0074 |
| Residual              | 0.1574 |        |        |



**Solution for Fixed Effects**

| Effect       | System    | Estimate | Standard Error | DF  | t Value | Pr >  t |
|--------------|-----------|----------|----------------|-----|---------|---------|
| System       | Bellin    | 0.000608 | 0.005766       | 786 | 0.11    | 0.9161  |
| System       | UW Health | 0.007940 | 0.005777       | 786 | 1.37    | 0.1697  |
| clinic_size  |           | 0        | 0              | 786 | Infy    | <.0001  |
| t7           |           | 0.000622 | 0.001325       | 249 | 0.47    | 0.6392  |
| PF_t7        |           | 0.004427 | 0.001785       | 786 | 2.48    | 0.0133  |
| t13          |           | 0.000011 | 0.001363       | 201 | 0.01    | 0.9938  |
| PF_t13       |           | 0.000586 | 0.001846       | 786 | 0.32    | 0.7511  |
| PPC_t13      |           | -0.00059 | 0.001462       | 786 | -0.40   | 0.6890  |
| PFandPPC_t13 |           | -0.00201 | 0.002012       | 786 | -1.00   | 0.3186  |

**Estimates**

| Label                 | Estimate | Standard Error | DF  | t Value | Pr >  t |
|-----------------------|----------|----------------|-----|---------|---------|
| NOINT Chg             | 0.01133  | 0.01784        | 786 | 0.64    | 0.5256  |
| PF Only Chg           | 0.09805  | 0.01748        | 786 | 5.61    | <.0001  |
| PPC Only Chg          | 0.004304 | 0.01749        | 786 | 0.25    | 0.8057  |
| PF & PPC Chg          | 0.06693  | 0.01731        | 786 | 3.87    | 0.0001  |
| PF Only vs NOINT      | 0.08672  | 0.02444        | 786 | 3.55    | 0.0004  |
| PPC Only vs NOINT     | -0.00702 | 0.01754        | 786 | -0.40   | 0.6890  |
| PF Only vs PPC Only 1 | 0.09374  | 0.02424        | 786 | 3.87    | 0.0001  |
| PF Only vs PPC Only 2 | 0.06718  | 0.01828        | 786 | 3.67    | 0.0003  |
| PF & PPC Interaction  | -0.02410 | 0.02415        | 786 | -1.00   | 0.3186  |
| PF & PPC vs NOINT     | 0.05560  | 0.02434        | 786 | 2.28    | 0.0226  |

### Studentized Residuals for y

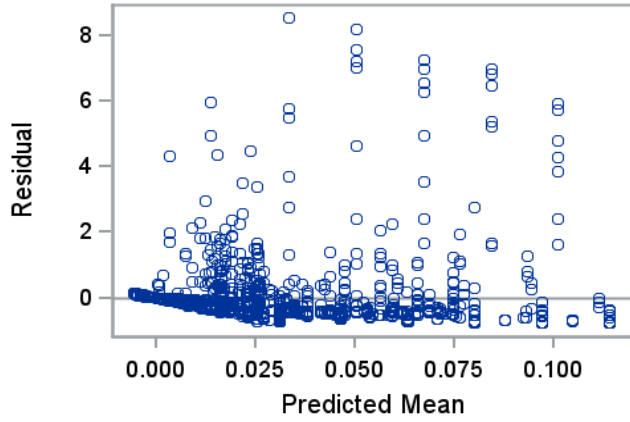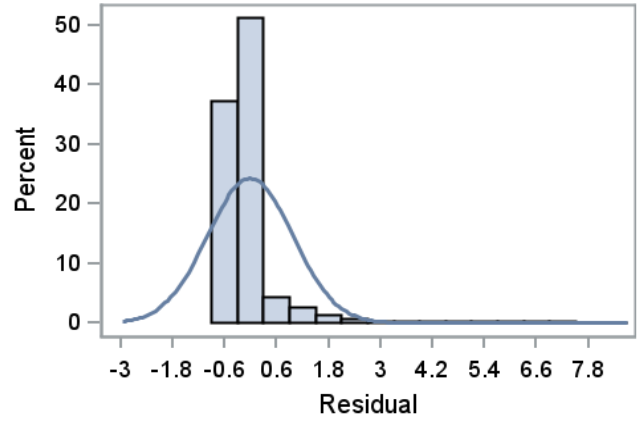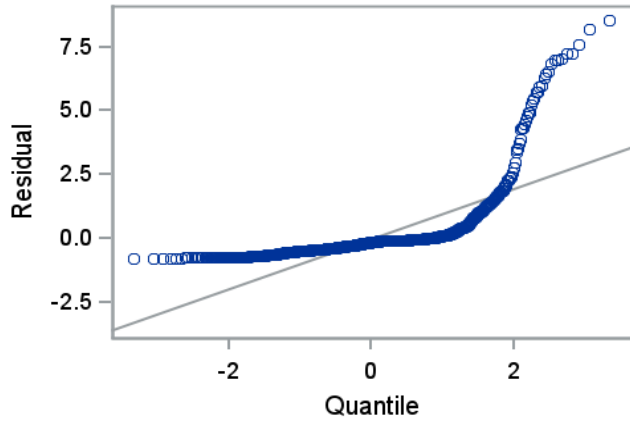

| Residual Statistics |        |
|---------------------|--------|
| Observations        | 1505   |
| Minimum             | -0.771 |
| Mean                | -0.014 |
| Maximum             | 8.5343 |
| Std Dev             | 0.986  |

  

| Fit Statistics |       |
|----------------|-------|
| Objective      | -4399 |
| AIC            | -4383 |
| AICC           | -4383 |
| BIC            | -4372 |

### Conditional Studentized Residuals for y

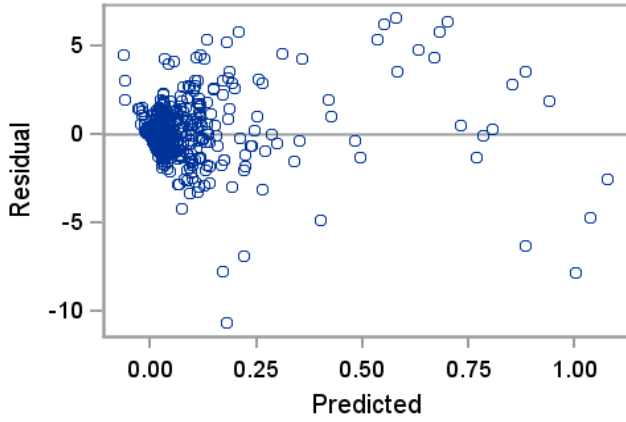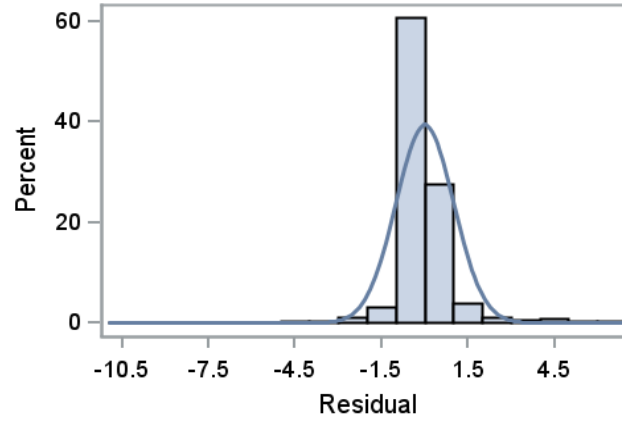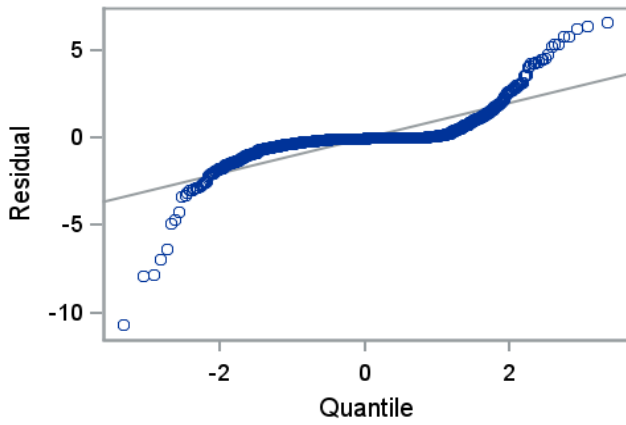

| Residual Statistics |        |
|---------------------|--------|
| Observations        | 1505   |
| Minimum             | -10.7  |
| Mean                | -0.004 |
| Maximum             | 6.617  |
| Std Dev             | 1.0114 |

  

| Fit Statistics |       |
|----------------|-------|
| Objective      | -4399 |
| AIC            | -4383 |
| AICC           | -4383 |
| BIC            | -4372 |

Specification of the Balanced Opioid Initiative Implementation Strategies:

- Adoption decision/preparation activities, which introduce the project and research team to the staff of health systems and clinics and help prepare the health systems and clinics for undertaking the project.
- Educational meetings, which consists of didactic sessions devoted to explain the opioid prescribing guidelines.
- Audit and feedback, which involves clinicians monitoring their opioid prescribing practices using monthly feedback reports.
- Practice facilitation, which focuses on improving clinic workflows related to opioid prescribing.
- Prescriber peer consulting, in which physician experts in opioid prescribing consult with prescribers about difficult panels and cases.

\**Temporality* in the table below, fifth column, shows the months each strategy was planned. Due to the COVID-19 pandemic, many of these dates were pushed back.

The table below is based on Proctor’s recommendations for specifying implementation strategies.<sup>2</sup> Strategies named in the first column come from Powell’s ERIC project unless otherwise noted.<sup>3</sup>

**ADOPTION DECISION/PREPARATION**

| Strategy | Actor (stakeholder who delivers implementation strategy) | Actions (of research team health systems, clinicians, and others) | Target of the action | Temporality* | Dose or intensity | Targeted implementation outcomes | Justification |
|----------|----------------------------------------------------------|-------------------------------------------------------------------|----------------------|--------------|-------------------|----------------------------------|---------------|
|----------|----------------------------------------------------------|-------------------------------------------------------------------|----------------------|--------------|-------------------|----------------------------------|---------------|

|                                                                                |                                                                    |                                                                                                                                                                                                                                                                                                         |                                                                                                                                                         |                                                                                                                                                                                                                  |                                                   |                                                                          |                                                                                                                                                                                      |
|--------------------------------------------------------------------------------|--------------------------------------------------------------------|---------------------------------------------------------------------------------------------------------------------------------------------------------------------------------------------------------------------------------------------------------------------------------------------------------|---------------------------------------------------------------------------------------------------------------------------------------------------------|------------------------------------------------------------------------------------------------------------------------------------------------------------------------------------------------------------------|---------------------------------------------------|--------------------------------------------------------------------------|--------------------------------------------------------------------------------------------------------------------------------------------------------------------------------------|
| 1-Develop academic partnerships (between an academic unit and a health system) | Principal Investigator (PI) and other members of the research team | Research team: As part of developing the proposal for the study, the PI contacts health system leaders to explain the project and ask for letter of support. After funding is obtained, research team initiates regular communication with health systems leaders to engage their active participation. | Engagement of health system leaders. If they want to participate, then engagement of clinic leaders and staff.<br><br><i>Note: We need to make sure</i> | Initial contact during the writing of the proposal. Meetings and site visits take place in Months 1-15, with frequency determined by research team and health system and clinic personnel on an as-needed basis. | Meetings are one hour. Site visits are 3-4 hours. | Increase the acceptability and adoption of opioid prescribing guidelines | Evidence suggests that the engagement of organizational leaders is critical to the success of change effort. References: Damschroder et al, CFIR, 2009; Aarons et al, Evidence-based |
|--------------------------------------------------------------------------------|--------------------------------------------------------------------|---------------------------------------------------------------------------------------------------------------------------------------------------------------------------------------------------------------------------------------------------------------------------------------------------------|---------------------------------------------------------------------------------------------------------------------------------------------------------|------------------------------------------------------------------------------------------------------------------------------------------------------------------------------------------------------------------|---------------------------------------------------|--------------------------------------------------------------------------|--------------------------------------------------------------------------------------------------------------------------------------------------------------------------------------|

| Strategy | Actor (stakeholder who delivers implementation strategy) | Actions (of research team health systems, clinicians, and others)                                                                                                                                                     | Target of the action                                                                                         | Temporality*                                          | Dose or intensity | Targeted implementation outcomes | Justification          |
|----------|----------------------------------------------------------|-----------------------------------------------------------------------------------------------------------------------------------------------------------------------------------------------------------------------|--------------------------------------------------------------------------------------------------------------|-------------------------------------------------------|-------------------|----------------------------------|------------------------|
|          |                                                          | Health systems: Health systems leaders write letter of support. After funding is obtained, leaders take part in meetings and other communications to move the study forward in a way that benefits the health system. | <i>we're getting green lights from people in a position to influence and/or take part in implementation.</i> | Email and phone contact also take place as necessary. |                   |                                  | practice implem, 2011. |

|                                                                 |                                                                                                                    |                                                                                                                                                                                                                                                                                                                                                                                                                               |                                                                                                                                      |                                                                                                             |                                                                     |                                                           |                                                                                                                                                               |
|-----------------------------------------------------------------|--------------------------------------------------------------------------------------------------------------------|-------------------------------------------------------------------------------------------------------------------------------------------------------------------------------------------------------------------------------------------------------------------------------------------------------------------------------------------------------------------------------------------------------------------------------|--------------------------------------------------------------------------------------------------------------------------------------|-------------------------------------------------------------------------------------------------------------|---------------------------------------------------------------------|-----------------------------------------------------------|---------------------------------------------------------------------------------------------------------------------------------------------------------------|
| <p><b>2-Develop and organize quality monitoring systems</b></p> | <p>PI and other research team members; each health system's designated information technology (IT) coordinator</p> | <p>PI calls initial meeting of research team, each health system's designated IT leader, Wisconsin Collaborative for Healthcare Quality (WCHQ) (which collects data from health systems), and the UW Health Innovation Program (HIP) (which de-identifies data and provides data sets to researchers). Subsequent tasks include defining and operationalizing outcomes, scheduling any necessary programming, testing the</p> | <p>Ease of producing and effectiveness of monthly reports for clinicians and ease and accuracy of data collection for the study.</p> | <p>Initial quality monitoring system is constructed during months 3-12 and revised during months 13-15.</p> | <p>Initial and follow-up monthly meetings are usually one hour.</p> | <p>Increase acceptability, feasibility, and fidelity.</p> | <p>Agreeing on outcome definitions and data collection methods gives researchers, clinicians, and health systems staff a clear, agreed-upon set of goals.</p> |
|-----------------------------------------------------------------|--------------------------------------------------------------------------------------------------------------------|-------------------------------------------------------------------------------------------------------------------------------------------------------------------------------------------------------------------------------------------------------------------------------------------------------------------------------------------------------------------------------------------------------------------------------|--------------------------------------------------------------------------------------------------------------------------------------|-------------------------------------------------------------------------------------------------------------|---------------------------------------------------------------------|-----------------------------------------------------------|---------------------------------------------------------------------------------------------------------------------------------------------------------------|

| <b>Strategy</b> | <b>Actor (stakeholder who delivers implementation strategy)</b> | <b>Actions (of research team health systems, clinicians, and others)</b>        | <b>Target of the action</b> | <b>Temporality*</b> | <b>Dose or intensity</b> | <b>Targeted implementation outcomes</b> | <b>Justification</b> |
|-----------------|-----------------------------------------------------------------|---------------------------------------------------------------------------------|-----------------------------|---------------------|--------------------------|-----------------------------------------|----------------------|
|                 |                                                                 | <p>data collection plan, and revising the data collection plan and methods.</p> |                             |                     |                          |                                         |                      |

**EDUCATIONAL MEETINGS (EM)**

| <b>Strategy</b>                 | <b>Actor (stakeholder who delivers implementation strategy)</b> | <b>Actions (of research team health systems, clinicians, and others)</b>                                                                                               | <b>Target of the action</b>                                                     | <b>Temporality*</b>                                                                                                             | <b>Dose or intensity</b>                    | <b>Targeted implementation outcomes</b> | <b>Justification</b>                                                                                                                                                                                                                        |
|---------------------------------|-----------------------------------------------------------------|------------------------------------------------------------------------------------------------------------------------------------------------------------------------|---------------------------------------------------------------------------------|---------------------------------------------------------------------------------------------------------------------------------|---------------------------------------------|-----------------------------------------|---------------------------------------------------------------------------------------------------------------------------------------------------------------------------------------------------------------------------------------------|
| 3-Develop educational materials | Research team                                                   | Research team develops presentation and training materials for regionally hosted, in-person training sessions. (Note: Due to COVID, sessions were all held virtually.) | Engagement, knowledge, and skills of clinic prescribers and other staff members | Materials (Powerpoint presentation, handouts) are developed in months 14-15. Training sessions take place starting in month 16. | 6 quarterly meetings spread over 18 months. | Increase adoption and feasibility.      | Prescribers may fall short of guideline concordance because they don't know what the guidelines say or lack the skills to implement guideline-concordant care. Increased knowledge and skills may suffice to improve guideline concordance. |

| <b>Strategy</b> | <b>Actor (stakeholder who delivers implementation strategy)</b> | <b>Actions (of research team health systems, clinicians, and others)</b> | <b>Target of the action</b> | <b>Temporality*</b> | <b>Dose or intensity</b> | <b>Targeted implementation outcomes</b> | <b>Justification</b> |
|-----------------|-----------------------------------------------------------------|--------------------------------------------------------------------------|-----------------------------|---------------------|--------------------------|-----------------------------------------|----------------------|
|-----------------|-----------------------------------------------------------------|--------------------------------------------------------------------------|-----------------------------|---------------------|--------------------------|-----------------------------------------|----------------------|

|                                                                                      |                                                |                                                                                                                                                                                                                                                                                                                                                     |                                                                                                                                              |                             |                 |                                                      |                                      |
|--------------------------------------------------------------------------------------|------------------------------------------------|-----------------------------------------------------------------------------------------------------------------------------------------------------------------------------------------------------------------------------------------------------------------------------------------------------------------------------------------------------|----------------------------------------------------------------------------------------------------------------------------------------------|-----------------------------|-----------------|------------------------------------------------------|--------------------------------------|
| <p>4-Conduct educational meetings, and</p> <p>5-Distribute educational materials</p> | <p>Physician experts in opioid prescribing</p> | <p>In regionally hosted, in-person meeting, physician experts describe clinical guidelines for opioid prescribing, how workflows can affect outcomes, and clinical outcomes and issues (e.g., how to balance pain and function during dose reduction). Give attendees handouts, links, and other information. Elicit engagement and enthusiasm.</p> | <p>Engagement, knowledge, and skills of prescribers and other staff members directly involved in workflows related to opioid prescribing</p> | <p>Starting in month 16</p> | <p>One hour</p> | <p>Increase adoption, feasibility, and fidelity.</p> | <p>Same as for Strategy 3 above.</p> |
|--------------------------------------------------------------------------------------|------------------------------------------------|-----------------------------------------------------------------------------------------------------------------------------------------------------------------------------------------------------------------------------------------------------------------------------------------------------------------------------------------------------|----------------------------------------------------------------------------------------------------------------------------------------------|-----------------------------|-----------------|------------------------------------------------------|--------------------------------------|

**AUDIT AND FEEDBACK (AF)**

| Strategy                                                         | Actor (stakeholder who delivers implementation strategy) | Actions (of research team health systems, clinicians, and others)                                         | Target of the action                                                                                | Temporality*                                                                                       | Dose or intensity                                       | Targeted implementation outcomes          | Justification                                                                                                |
|------------------------------------------------------------------|----------------------------------------------------------|-----------------------------------------------------------------------------------------------------------|-----------------------------------------------------------------------------------------------------|----------------------------------------------------------------------------------------------------|---------------------------------------------------------|-------------------------------------------|--------------------------------------------------------------------------------------------------------------|
| <p>6-Audit and provide feedback</p> <p>7-Facilitate relay of</p> | <p>Designated IT coordinator at each health system</p>   | <p>Work with prescribers to ensure they have reports that help them monitor their opioid prescribing.</p> | <p>Knowledge and skills mainly of prescribers, but consultation on using the EHR and the use of</p> | <p>Clinicians will receive monthly feedback reports during Months 16-36. EHR consultation will</p> | <p>One report monthly in months 16-36. Consultation</p> | <p>Increase feasibility and fidelity.</p> | <p>Prescribers need feedback on outcome data to assess their own performance because self-assessment and</p> |



|                                                                                                        |  |                                                                                                                                                                                                                                                                                                                                               |                                                                                                                    |                                                  |                               |  |                                                                                                                                                                                                                                                                                                                                  |
|--------------------------------------------------------------------------------------------------------|--|-----------------------------------------------------------------------------------------------------------------------------------------------------------------------------------------------------------------------------------------------------------------------------------------------------------------------------------------------|--------------------------------------------------------------------------------------------------------------------|--------------------------------------------------|-------------------------------|--|----------------------------------------------------------------------------------------------------------------------------------------------------------------------------------------------------------------------------------------------------------------------------------------------------------------------------------|
| <p>clinical data to providers</p> <p><b>8-Conduct educational outreach visits (with providers)</b></p> |  | <p>This may involve programming or ensuring that programming gets done. Consult with prescribers and other clinicians on how to use the electronic health record (EHR) to monitor opioid prescribing and ensure that clinicians receive monthly reports. Consultation may be offered on the phone, in email, or during visits to clinics.</p> | <p>feedback reports might also target clinic staff members who work with patients on long-term opioid therapy.</p> | <p>be offered as needed during Months 16-36.</p> | <p>takes place as needed.</p> |  | <p>correction are essential to making and sustaining the changes. In Deming’s quality improvement model, this falls under “how will you know if a change is an improvement?”</p> <p>The EHR has tools for monitoring opioid prescribing. Knowing how to use these tools may ease prescribers’ path to guideline concordance.</p> |
|--------------------------------------------------------------------------------------------------------|--|-----------------------------------------------------------------------------------------------------------------------------------------------------------------------------------------------------------------------------------------------------------------------------------------------------------------------------------------------|--------------------------------------------------------------------------------------------------------------------|--------------------------------------------------|-------------------------------|--|----------------------------------------------------------------------------------------------------------------------------------------------------------------------------------------------------------------------------------------------------------------------------------------------------------------------------------|

**PRACTICE FACILITATION (PF)**

| Strategy                                                                            | Actor (stakeholder who delivers implementation strategy) | Actions (of research team health systems, clinicians, and others)                                                                                                                       | Target of the action                                                                                                                                                                                                                                                  | Temporality* | Dose or intensity    | Targeted implementation outcomes                   | Justification                                                                                                                                                         |
|-------------------------------------------------------------------------------------|----------------------------------------------------------|-----------------------------------------------------------------------------------------------------------------------------------------------------------------------------------------|-----------------------------------------------------------------------------------------------------------------------------------------------------------------------------------------------------------------------------------------------------------------------|--------------|----------------------|----------------------------------------------------|-----------------------------------------------------------------------------------------------------------------------------------------------------------------------|
| 9-Recruit, designate, and train for leadership for the change effort at each clinic | Practice facilitator                                     | Practice facilitator works with clinic medical director to identify a physician change leader for the clinic, who in turn selects about five other staff members to form a change team. | Engagement of respected clinic staff members whose work involves opioid prescriptions. This could include a receptionist who takes a call from a patient wanting a refill, a medical assistant who checks for a recent treatment agreement, a prescriber, and others. | Month 16     | Will vary by clinic. | Increase acceptability, adoption, and feasibility. | Forming a team within a clinic to carry out the project locates responsibility for the work in the clinic and gives change team members colleagues in doing the work. |

|                                                   |                      |                                             |                                                                       |          |     |                                                    |                                                                                                                                                                                                                                                                      |
|---------------------------------------------------|----------------------|---------------------------------------------|-----------------------------------------------------------------------|----------|-----|----------------------------------------------------|----------------------------------------------------------------------------------------------------------------------------------------------------------------------------------------------------------------------------------------------------------------------|
| 10-Organize clinician implementation team meeting | Practice facilitator | Practice facilitator arranges a site visit. | Attendance, engagement, knowledge, and skills of change team members. | Month 19 | TBD | Increase acceptability, adoption, and feasibility. | The implementation team (the change team) focuses on clinic processes related to opioid prescribing, based on Deming's argument that problems most often result from poor systems (rather than the actions of individuals). The site visit uncovers systems problems |
|---------------------------------------------------|----------------------|---------------------------------------------|-----------------------------------------------------------------------|----------|-----|----------------------------------------------------|----------------------------------------------------------------------------------------------------------------------------------------------------------------------------------------------------------------------------------------------------------------------|

| Strategy | Actor (stakeholder who delivers implementation strategy) | Actions (of research team health systems, clinicians, and others) | Target of the action | Temporality* | Dose or intensity | Targeted implementation outcomes | Justification                                                                                   |
|----------|----------------------------------------------------------|-------------------------------------------------------------------|----------------------|--------------|-------------------|----------------------------------|-------------------------------------------------------------------------------------------------|
|          |                                                          |                                                                   |                      |              |                   |                                  | (bottlenecks, redundancy, etc.) in opioid prescribing and introduces tools for addressing them. |

|                                                                                                                                                                                          |                      |                                                                                                                                                                                                                                                     |                                                          |              |                                                                                                        |                                                               |                                                                                                                                     |
|------------------------------------------------------------------------------------------------------------------------------------------------------------------------------------------|----------------------|-----------------------------------------------------------------------------------------------------------------------------------------------------------------------------------------------------------------------------------------------------|----------------------------------------------------------|--------------|--------------------------------------------------------------------------------------------------------|---------------------------------------------------------------|-------------------------------------------------------------------------------------------------------------------------------------|
| <p><b>11-</b> Promote adaptability</p> <p><b>12-</b> Provide local technical assistance</p> <p><b>13-</b> Tailor strategies</p> <p><b>14-</b> Purposely reexamine the implementation</p> | Practice facilitator | <p>Practice facilitator teaches change team members to use tools such as these:</p> <ul style="list-style-type: none"> <li>• Walkthroughs</li> <li>• Flowcharting</li> <li>• Nominal group technique</li> <li>• Plan-Do-Study-Act cycles</li> </ul> | Knowledge and skills of change team members              | Months 19-36 | On-site visit is described above. Thereafter, one-hour teleconferences or videoconferences take place. | Increase adoption, feasibility, and fidelity.                 | Clinicians may not understand how to fix systems problems. The systems engineering tools address these problems in a practical way. |
| <p><b>15-</b> Promote network weaving (building on working relationships and networks)</p>                                                                                               | Practice facilitator | Practice facilitator organizes a videoconference so members of different change teams can learn                                                                                                                                                     | Engagement, knowledge, and skills of change team members | Month 23     | One-hour                                                                                               | Increase adoption, fidelity, penetration, and sustainability. | A videoconference makes known the identity of other change teams and the work they've done known. This may increase engagement,     |

| Strategy | Actor (stakeholder who delivers implementation strategy) | Actions (of research team health systems, clinicians, and others) | Target of the action | Temporality* | Dose or intensity | Targeted implementation outcomes | Justification |
|----------|----------------------------------------------------------|-------------------------------------------------------------------|----------------------|--------------|-------------------|----------------------------------|---------------|
|----------|----------------------------------------------------------|-------------------------------------------------------------------|----------------------|--------------|-------------------|----------------------------------|---------------|

|                                         |                      |                                                                                                                              |                                                                             |              |                                                |                                                     |                                                                                                                 |
|-----------------------------------------|----------------------|------------------------------------------------------------------------------------------------------------------------------|-----------------------------------------------------------------------------|--------------|------------------------------------------------|-----------------------------------------------------|-----------------------------------------------------------------------------------------------------------------|
| within and outside clinics)             |                      | from one another.                                                                                                            |                                                                             |              |                                                |                                                     | suggest new ideas or methods to try, and increase dissemination across the health system.                       |
| <b>16-Stage</b> implementation scale up | Practice facilitator | Practice facilitator works with clinic change team members to plan for dissemination of improved workflows across the clinic | Engagement, knowledge, and skills of change team members + all clinic staff | Months 23-24 | Part of monthly practice facilitation meetings | Increase adoption, penetration, and sustainability. | Improvements identified by change teams likely require planned dissemination efforts to reach all clinic staff. |

### PRESCRIBER PEER CONSULTING (PPC)

| <b>Strategy</b>                                                           | <b>Actor (stakeholder who delivers implementation strategy)</b> | <b>Actions (of research team health systems, clinicians, and others)</b>                                                                                                  | <b>Target of the action</b>         | <b>Temporality*</b>       | <b>Dose or intensity</b>                        | <b>Targeted implementation outcomes</b> | <b>Justification</b>                                                                   |
|---------------------------------------------------------------------------|-----------------------------------------------------------------|---------------------------------------------------------------------------------------------------------------------------------------------------------------------------|-------------------------------------|---------------------------|-------------------------------------------------|-----------------------------------------|----------------------------------------------------------------------------------------|
| 17-Facilitation (as the ERIC study defines it, i.e., interactive problem) | Prescriber peer consultants                                     | Research team members set up one-hour consultations with individual prescribers or small groups of prescribers and instruct prescribers to bring challenging cases to the | Knowledge and skills of prescribers | Quarterly in Months 25-36 | One hour per teleconference or video conference | Increase feasibility and fidelity.      | Helping prescribers think through specific challenging cases may improve treatment for |

| Strategy             | Actor (stakeholder who delivers implementation strategy) | Actions (of research team health systems, clinicians, and others)                                                                                                                                                                            | Target of the action | Temporality* | Dose or intensity | Targeted implementation outcomes | Justification                                                                    |
|----------------------|----------------------------------------------------------|----------------------------------------------------------------------------------------------------------------------------------------------------------------------------------------------------------------------------------------------|----------------------|--------------|-------------------|----------------------------------|----------------------------------------------------------------------------------|
| solving and support) |                                                          | session. Physician peer consultants conduct the consultations via teleconference or video-conference. Clinic prescribers describe difficult cases, and peer coaches help the prescriber(s) think through how to address the difficulty(ies). |                      |              |                   |                                  | specific patients and generalize to the treatment of other challenging patients. |

**eReferences.**

1. Aarons GA, Hurlburt M, Horwitz SM. Advancing a conceptual model of evidence-based practice implementation in public service sectors. *Adm Policy Ment Health*. 2011;38(1):4-23.
2. Proctor EK, Powell BJ, McMillen JC. Implementation strategies: commendations for specifying and reporting. *Implemt Sci*. 2013;8:139.
3. Powell BJ, Waltz TJ, Chinman MJ et al. A refined compilation of implementation strategies: results from the Expert Recommendations for Implementing Change (ERIC) project. *Implemt Sci*. 2015;10:21.
