# Supplementary material for: Strategies to Deimplement Opioid Prescribing in Primary Care: A Cluster Randomized Clinical Trial
Source: PubMed Central journal article supplement (PMC11581553; doi:10.1001/jamanetworkopen.2024.38325), 2024-10-10
Supplement: jamanetwopen-e2438325-s003.pdf [file jamanetwopen-e2438325-s003.pdf]

## Data Sharing Statement

Quanbeck. Strategies to Deimplement Opioid Prescribing in Primary Care. *JAMA Netw Open*. Published October 10, 2024. doi:10.1001/jamanetworkopen.2024.38325

### Data

**Data available:** Yes

**Data types:** Deidentified participant data, Data dictionary

**How to access data:** Access to study data may be requested by contacting corresponding author Andrew Quanbeck at [andrew.quanbeck@fammed.wisc.edu](mailto:andrew.quanbeck@fammed.wisc.edu).

**When available:** With publication

### Supporting Documents

**Document types:** Statistical/analytic code, Other (please specify)

**Additional Information:** Implementation strategy specification.

**How to access documents:** Included as supplementary online material with publication.

**When available:** With publication

### Additional Information

**Who can access the data:** The data will be made available to researchers whose proposed use of the data has been approved via a data sharing agreement with the Health Innovation Program at the University of Wisconsin.

**Types of analyses:** For a specified purpose.

**Mechanisms of data availability:** with a signed data access agreement

**Any additional restrictions:** Researchers will need to complete required onboarding and training on data security required by the Health Innovation Program at the University of Wisconsin.
